# Supplementary material for: Midkine noncanonically suppresses AMPK activation through disrupting the LKB1-STRAD-Mo25 complex
Source: PubMed Central journal article supplement (PMC9054788; doi:10.1038/s41419-022-04801-0), 2022-04-29

Fig.1A

15kD —

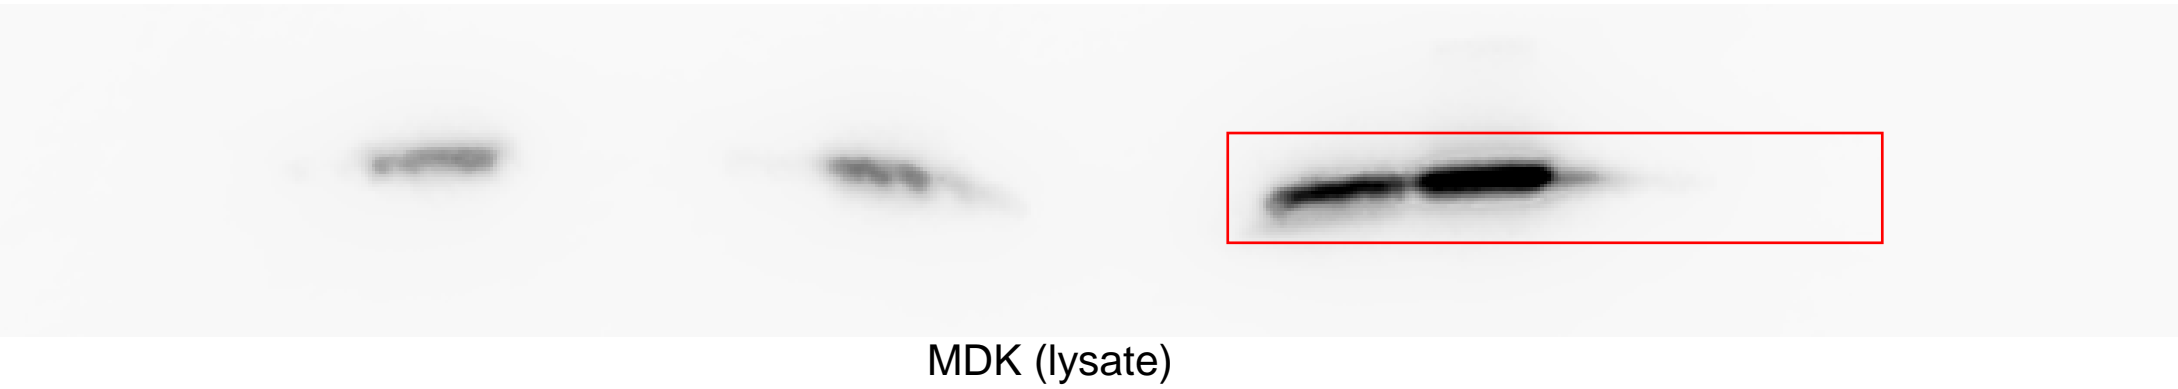

40kD —

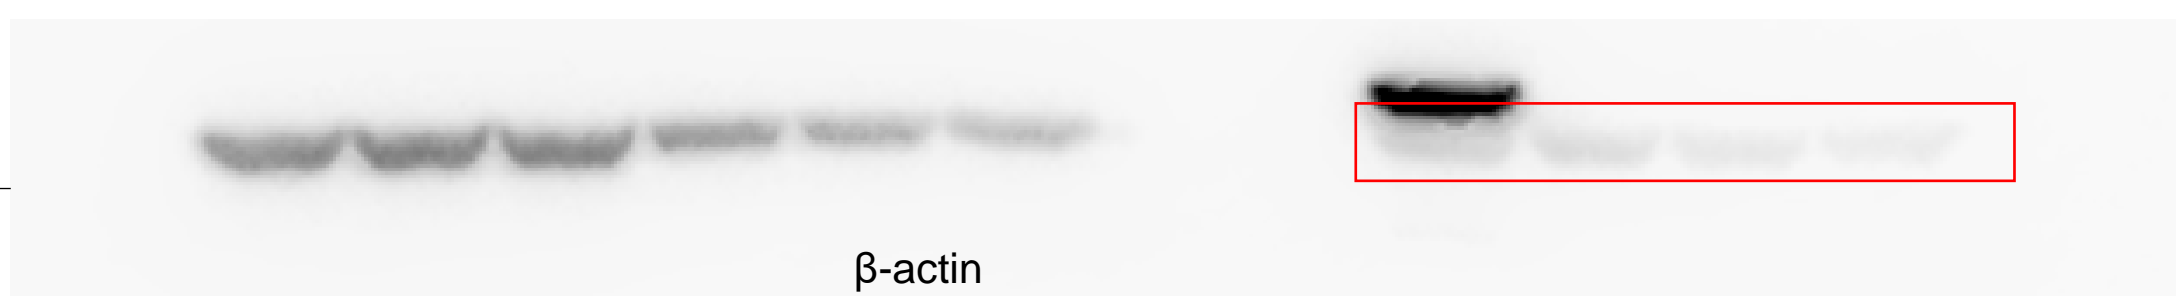

15kD —

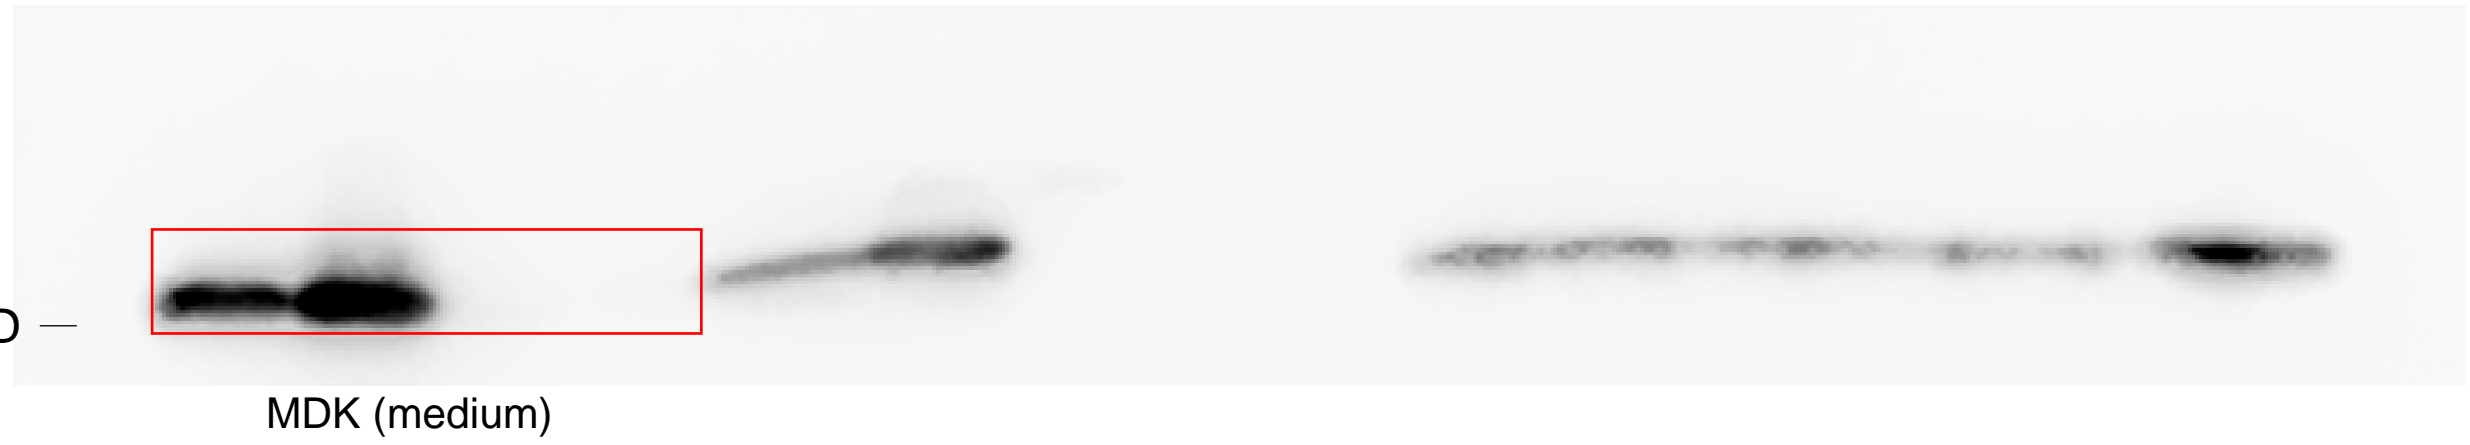

Fig.1B

15kD —

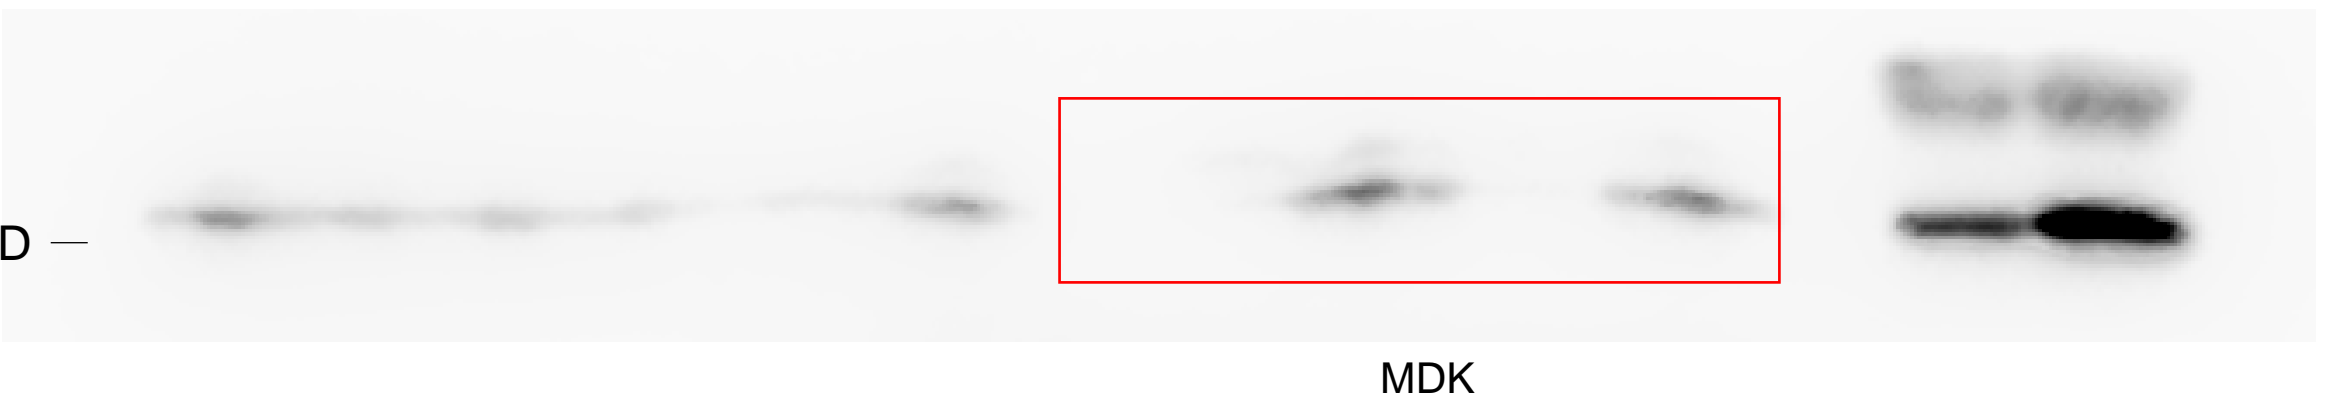

40kD —

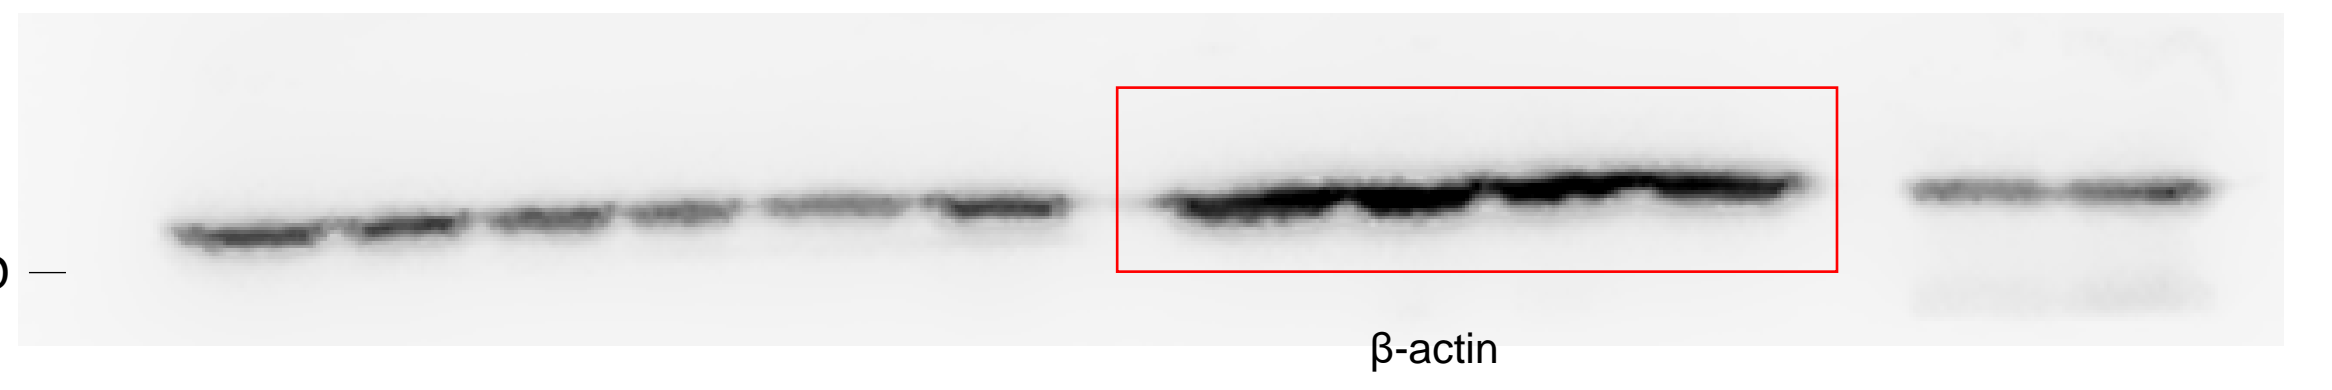

Fig.1C

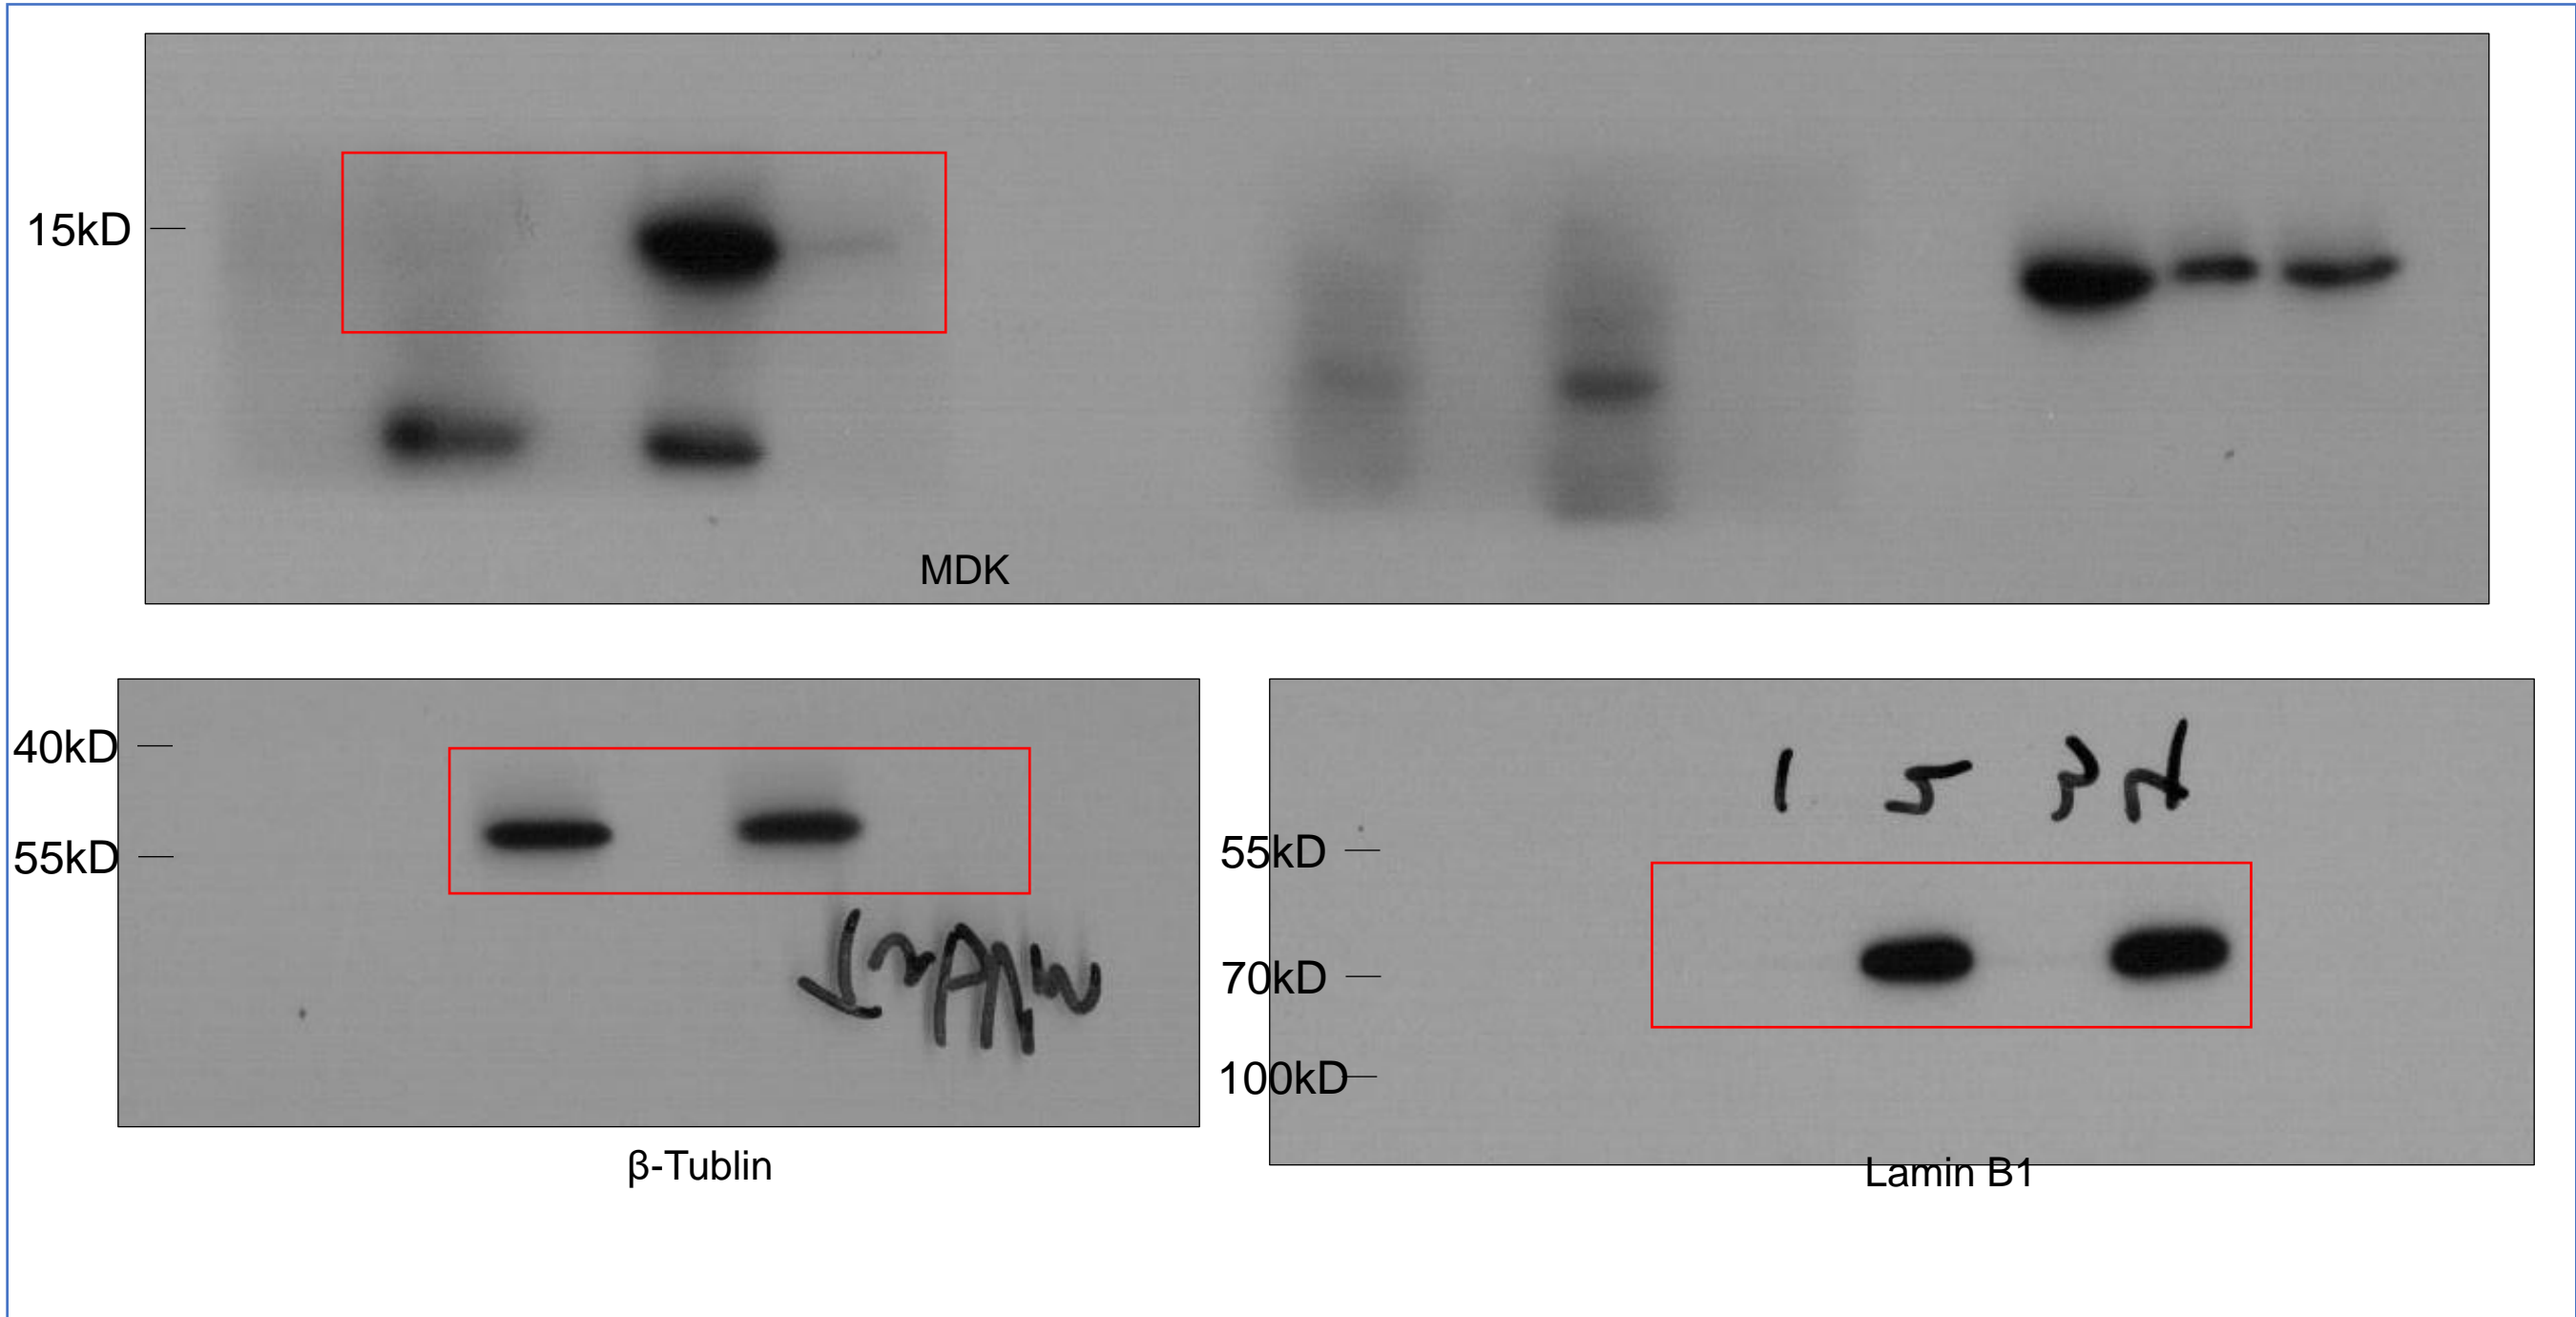

Fig.1E

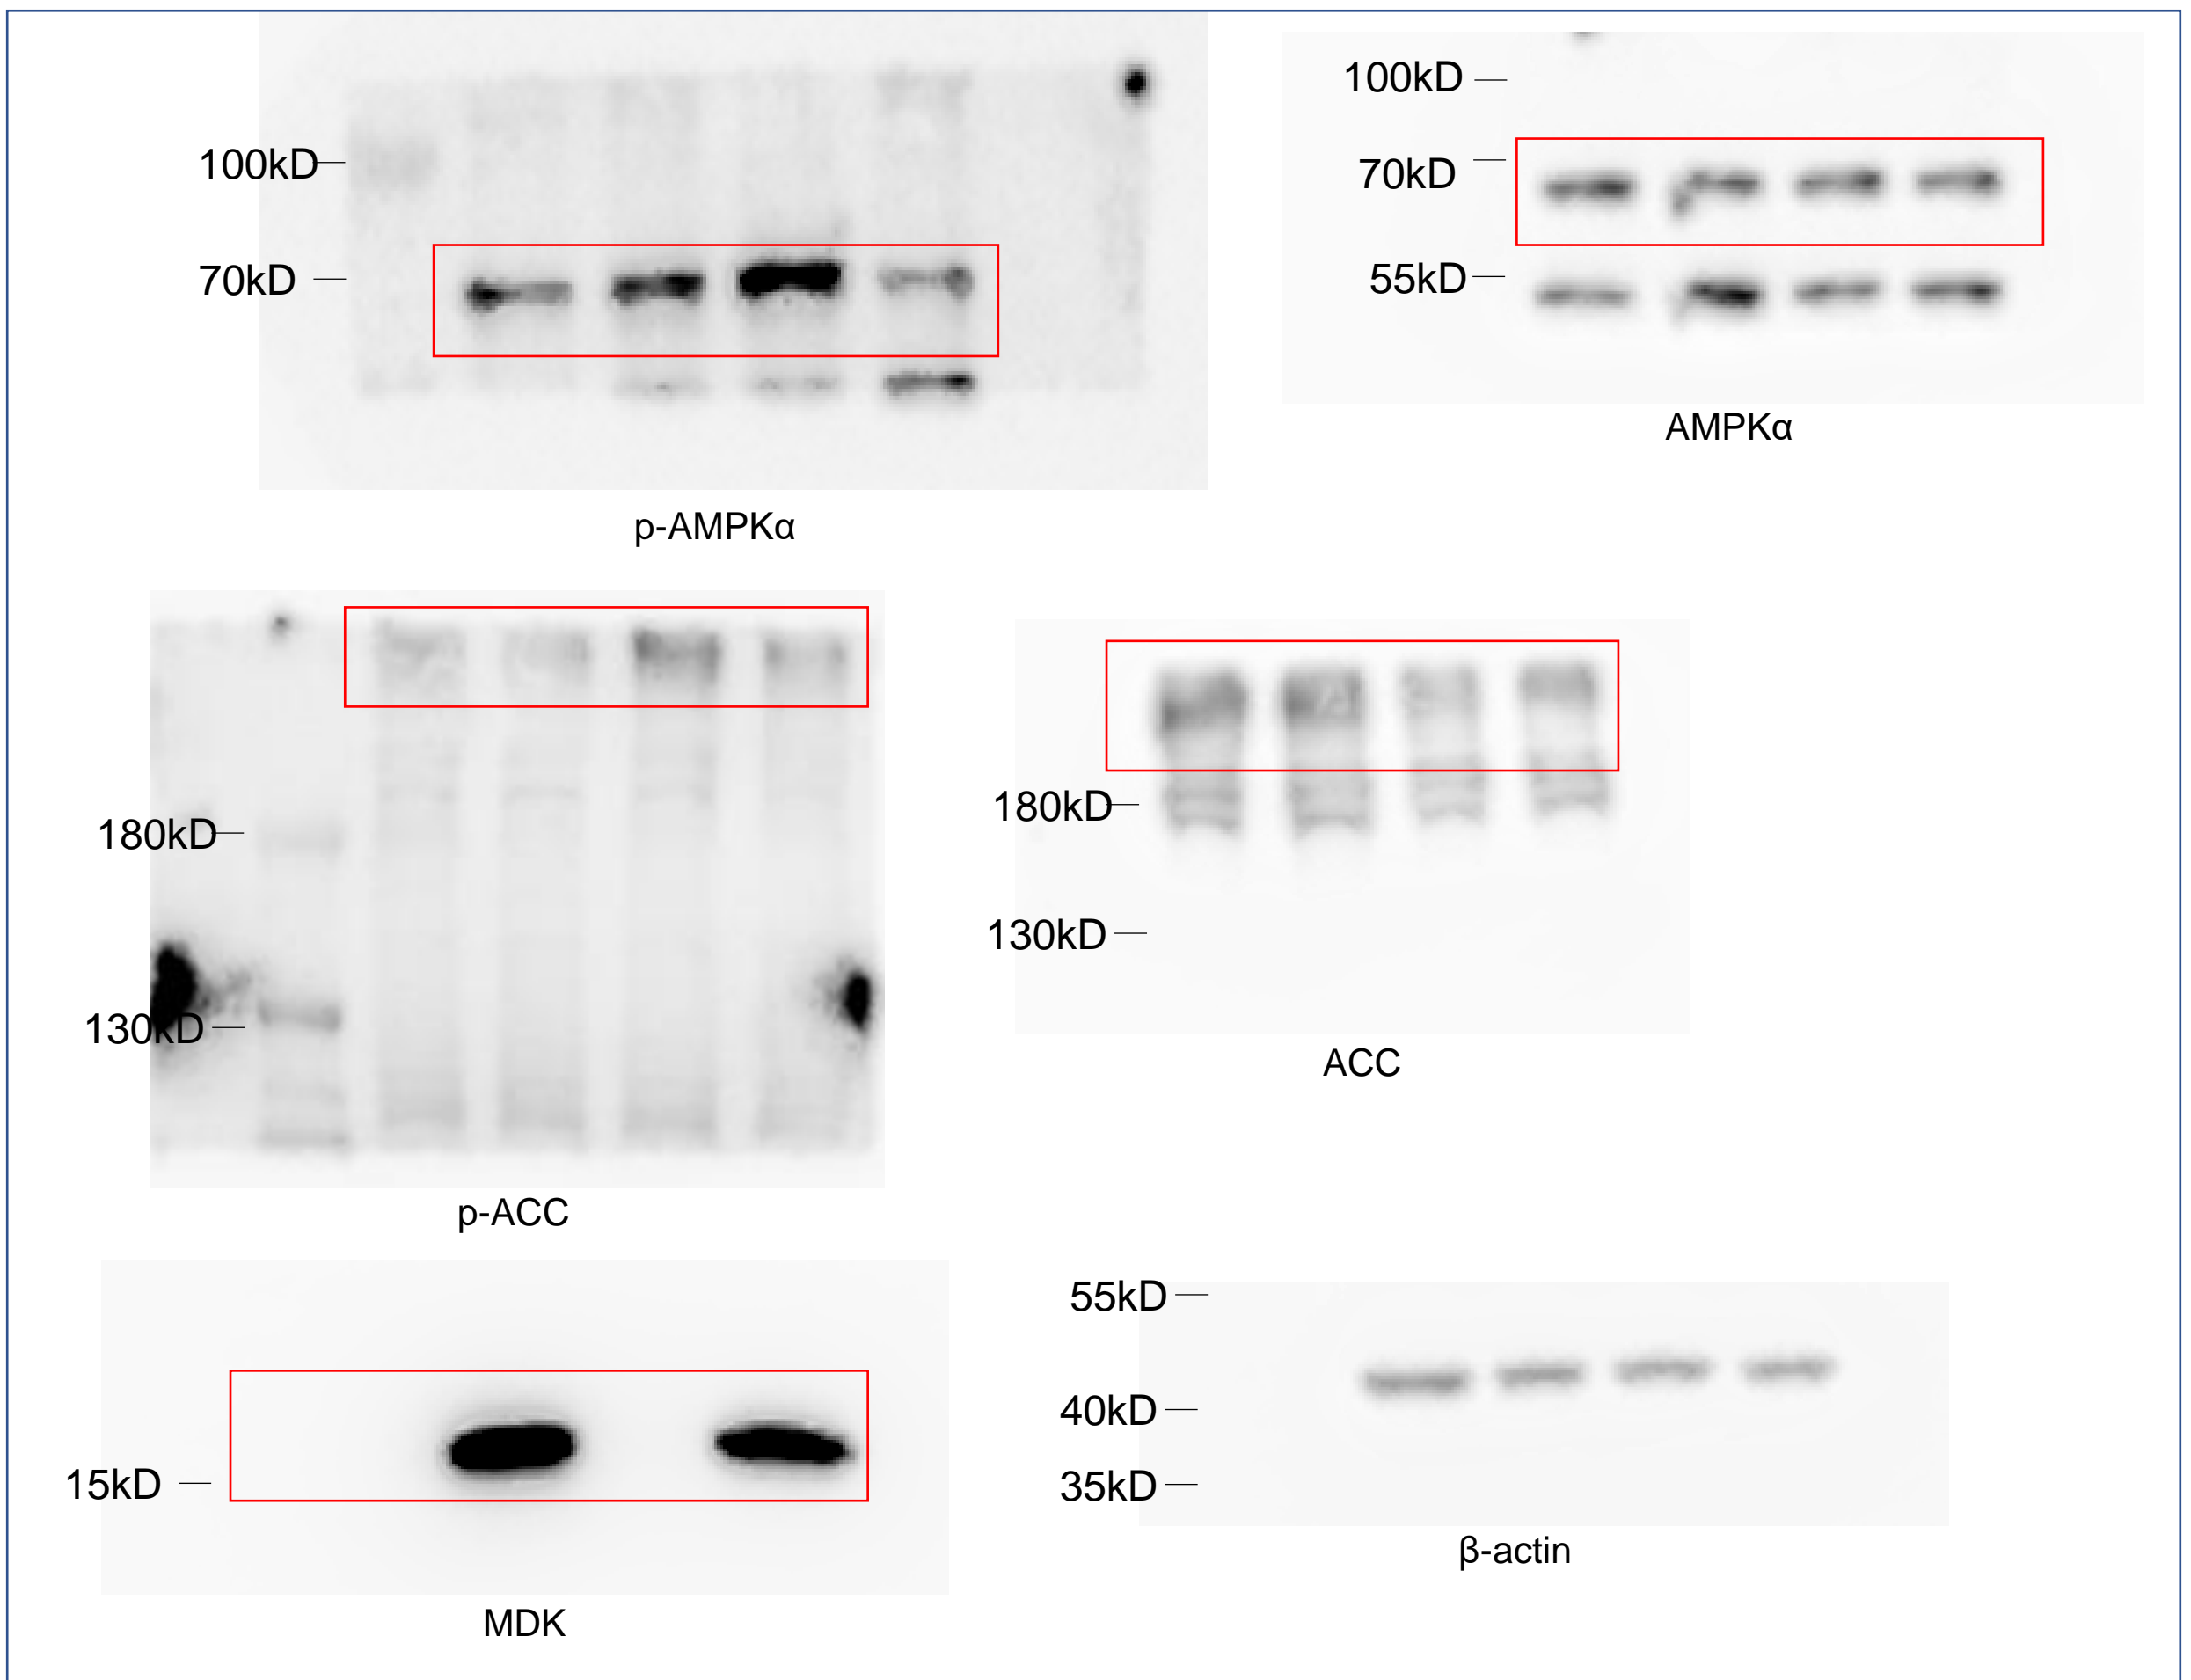

Fig.1F

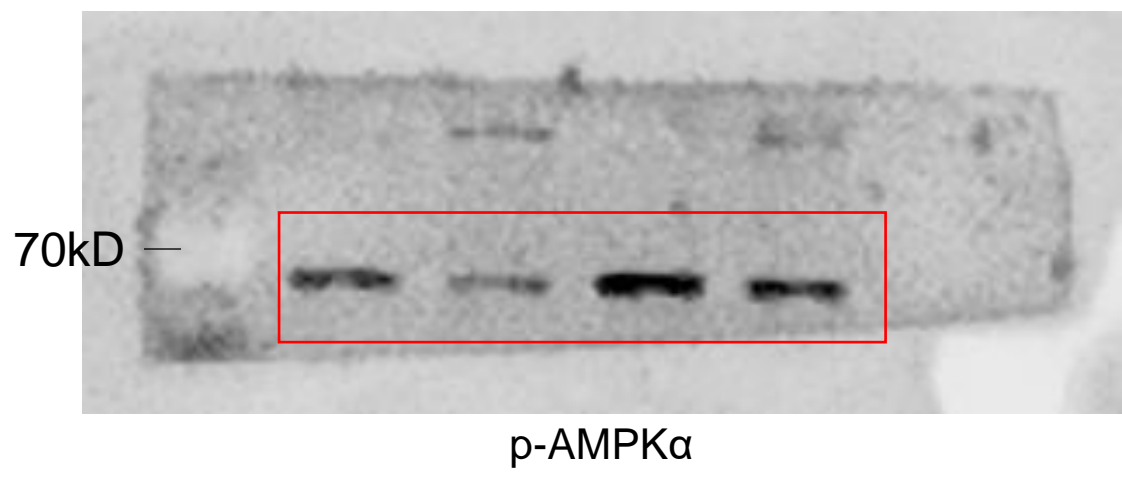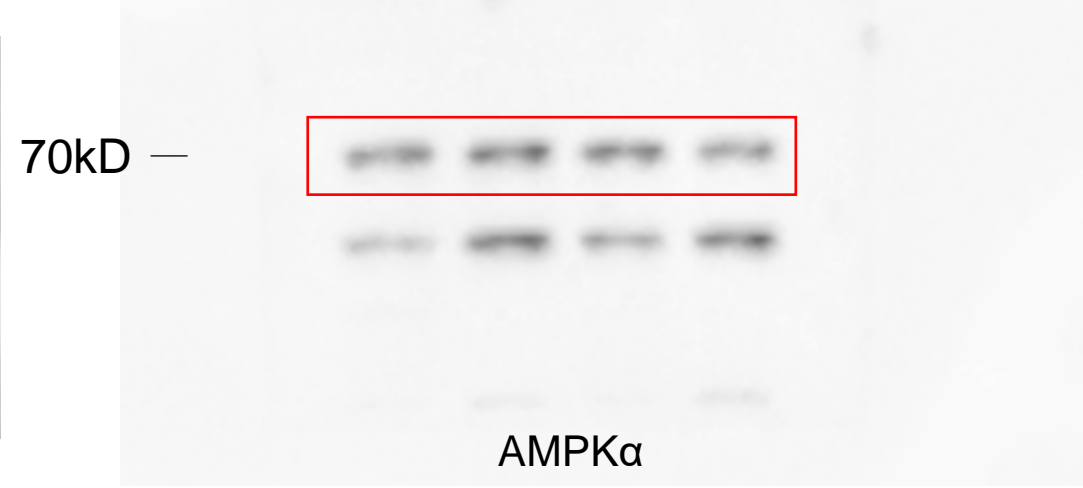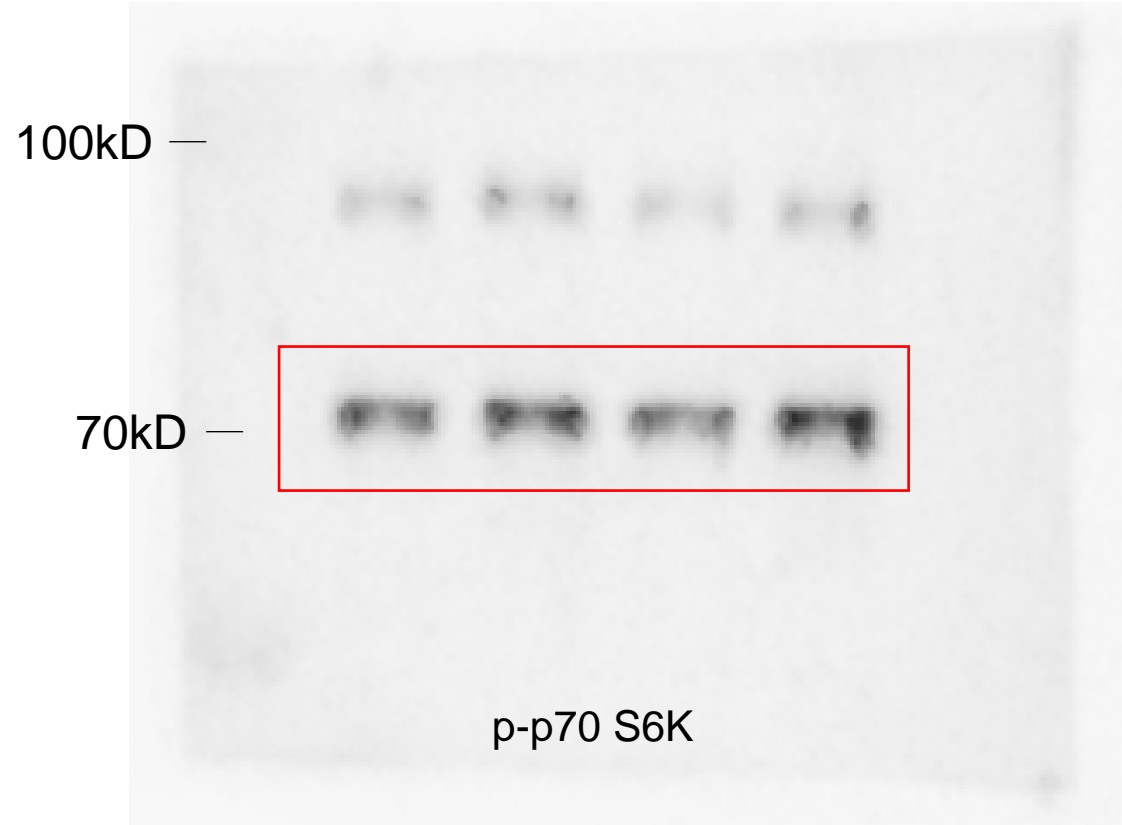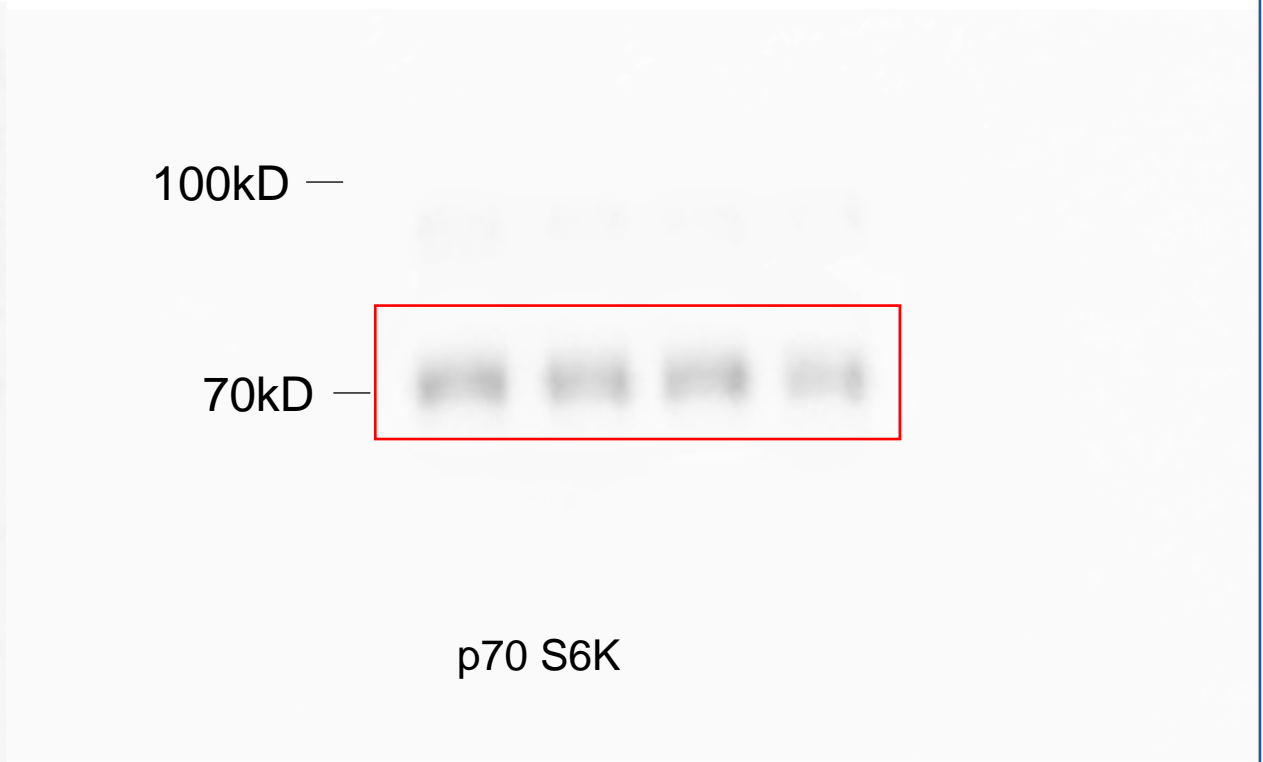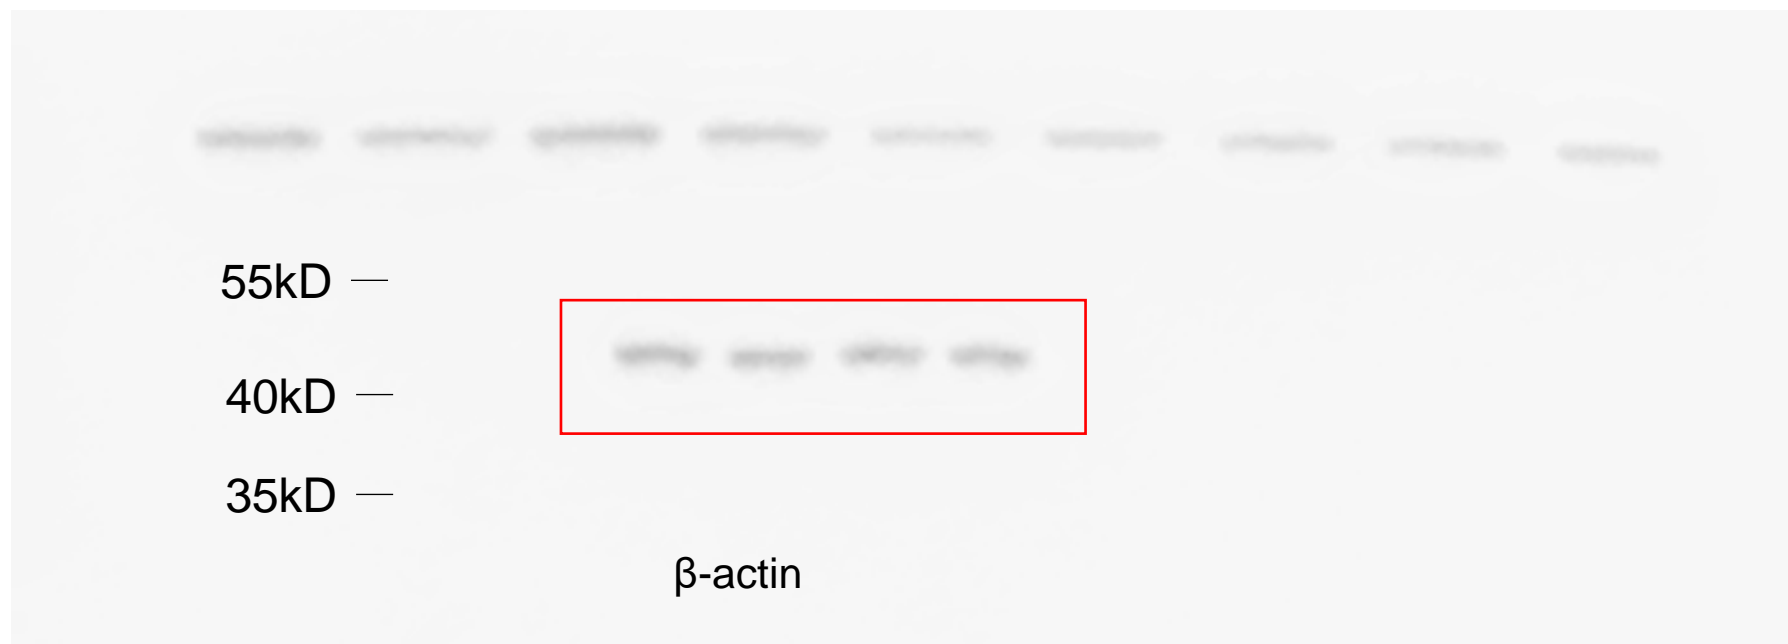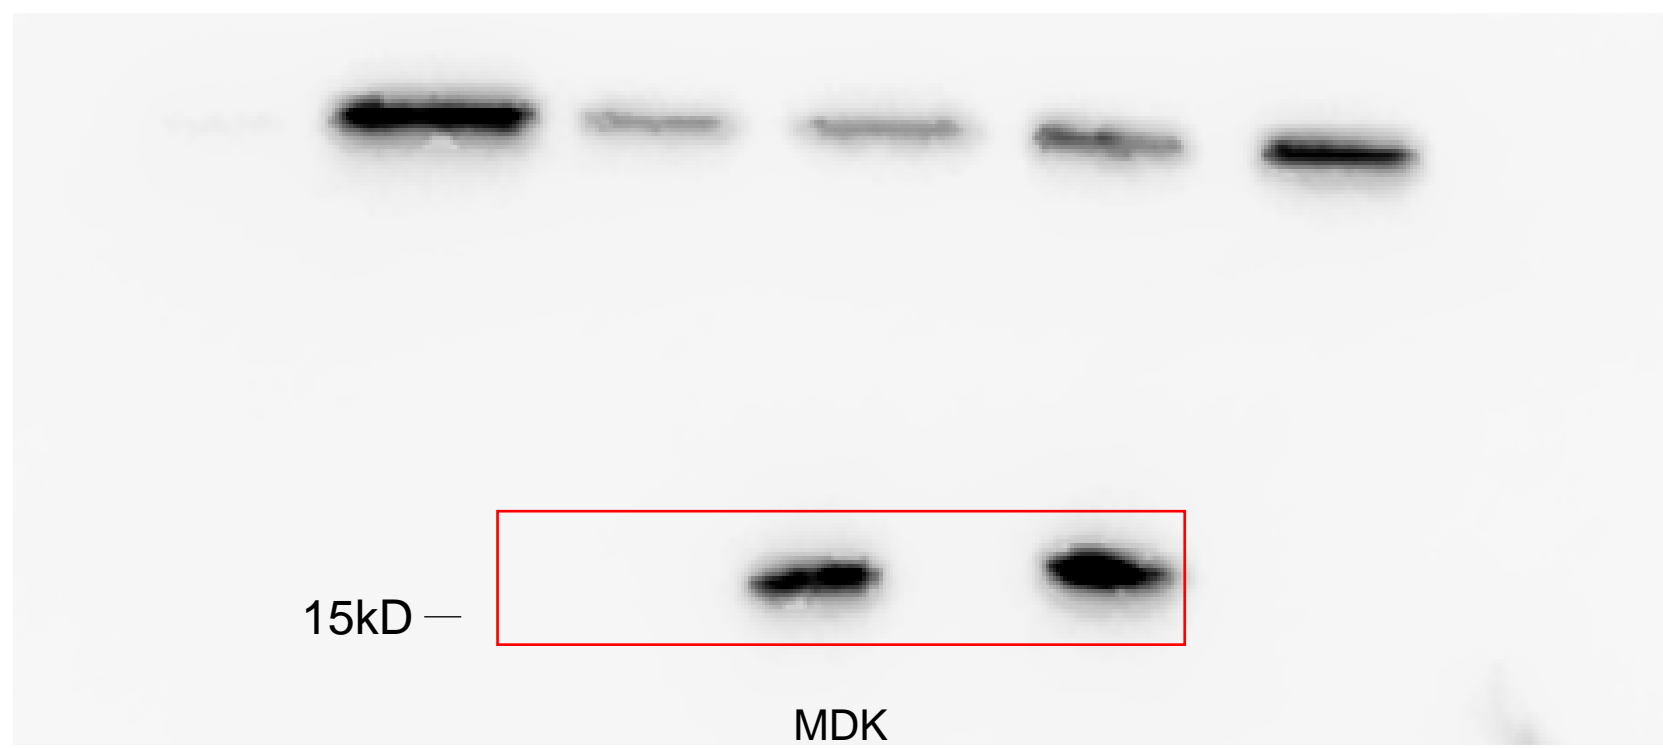

Fig.1G

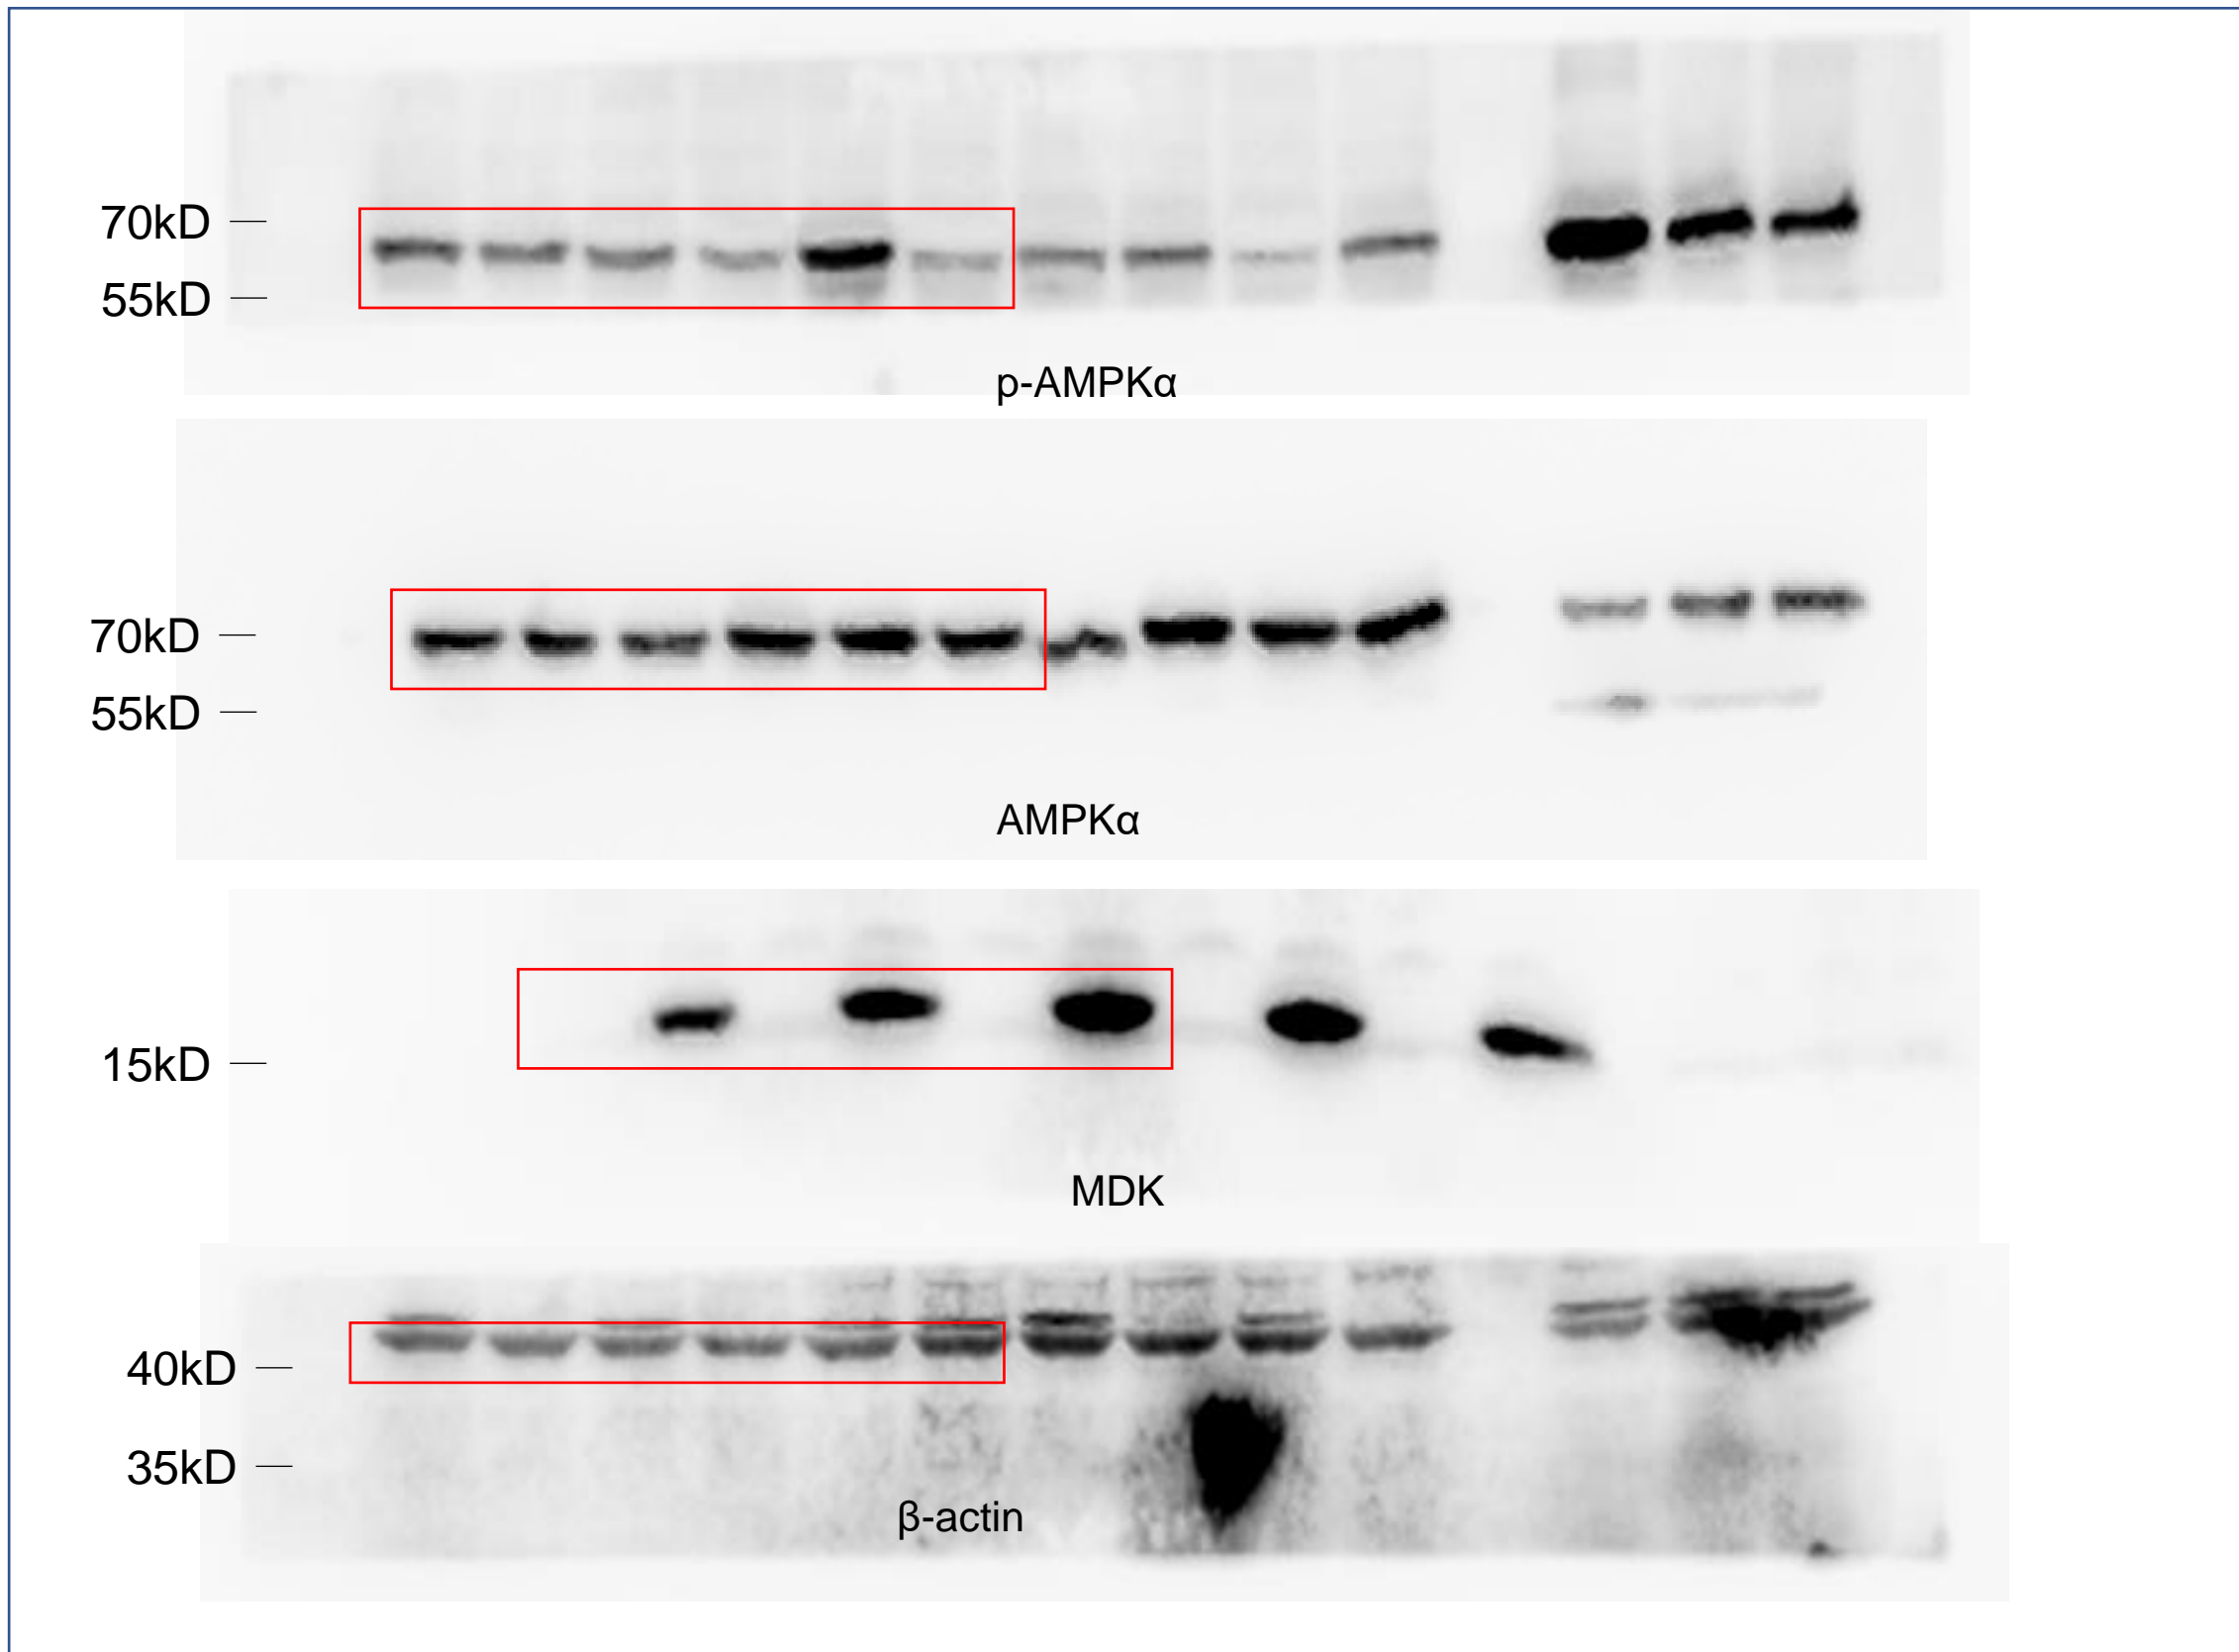

Fig.1H

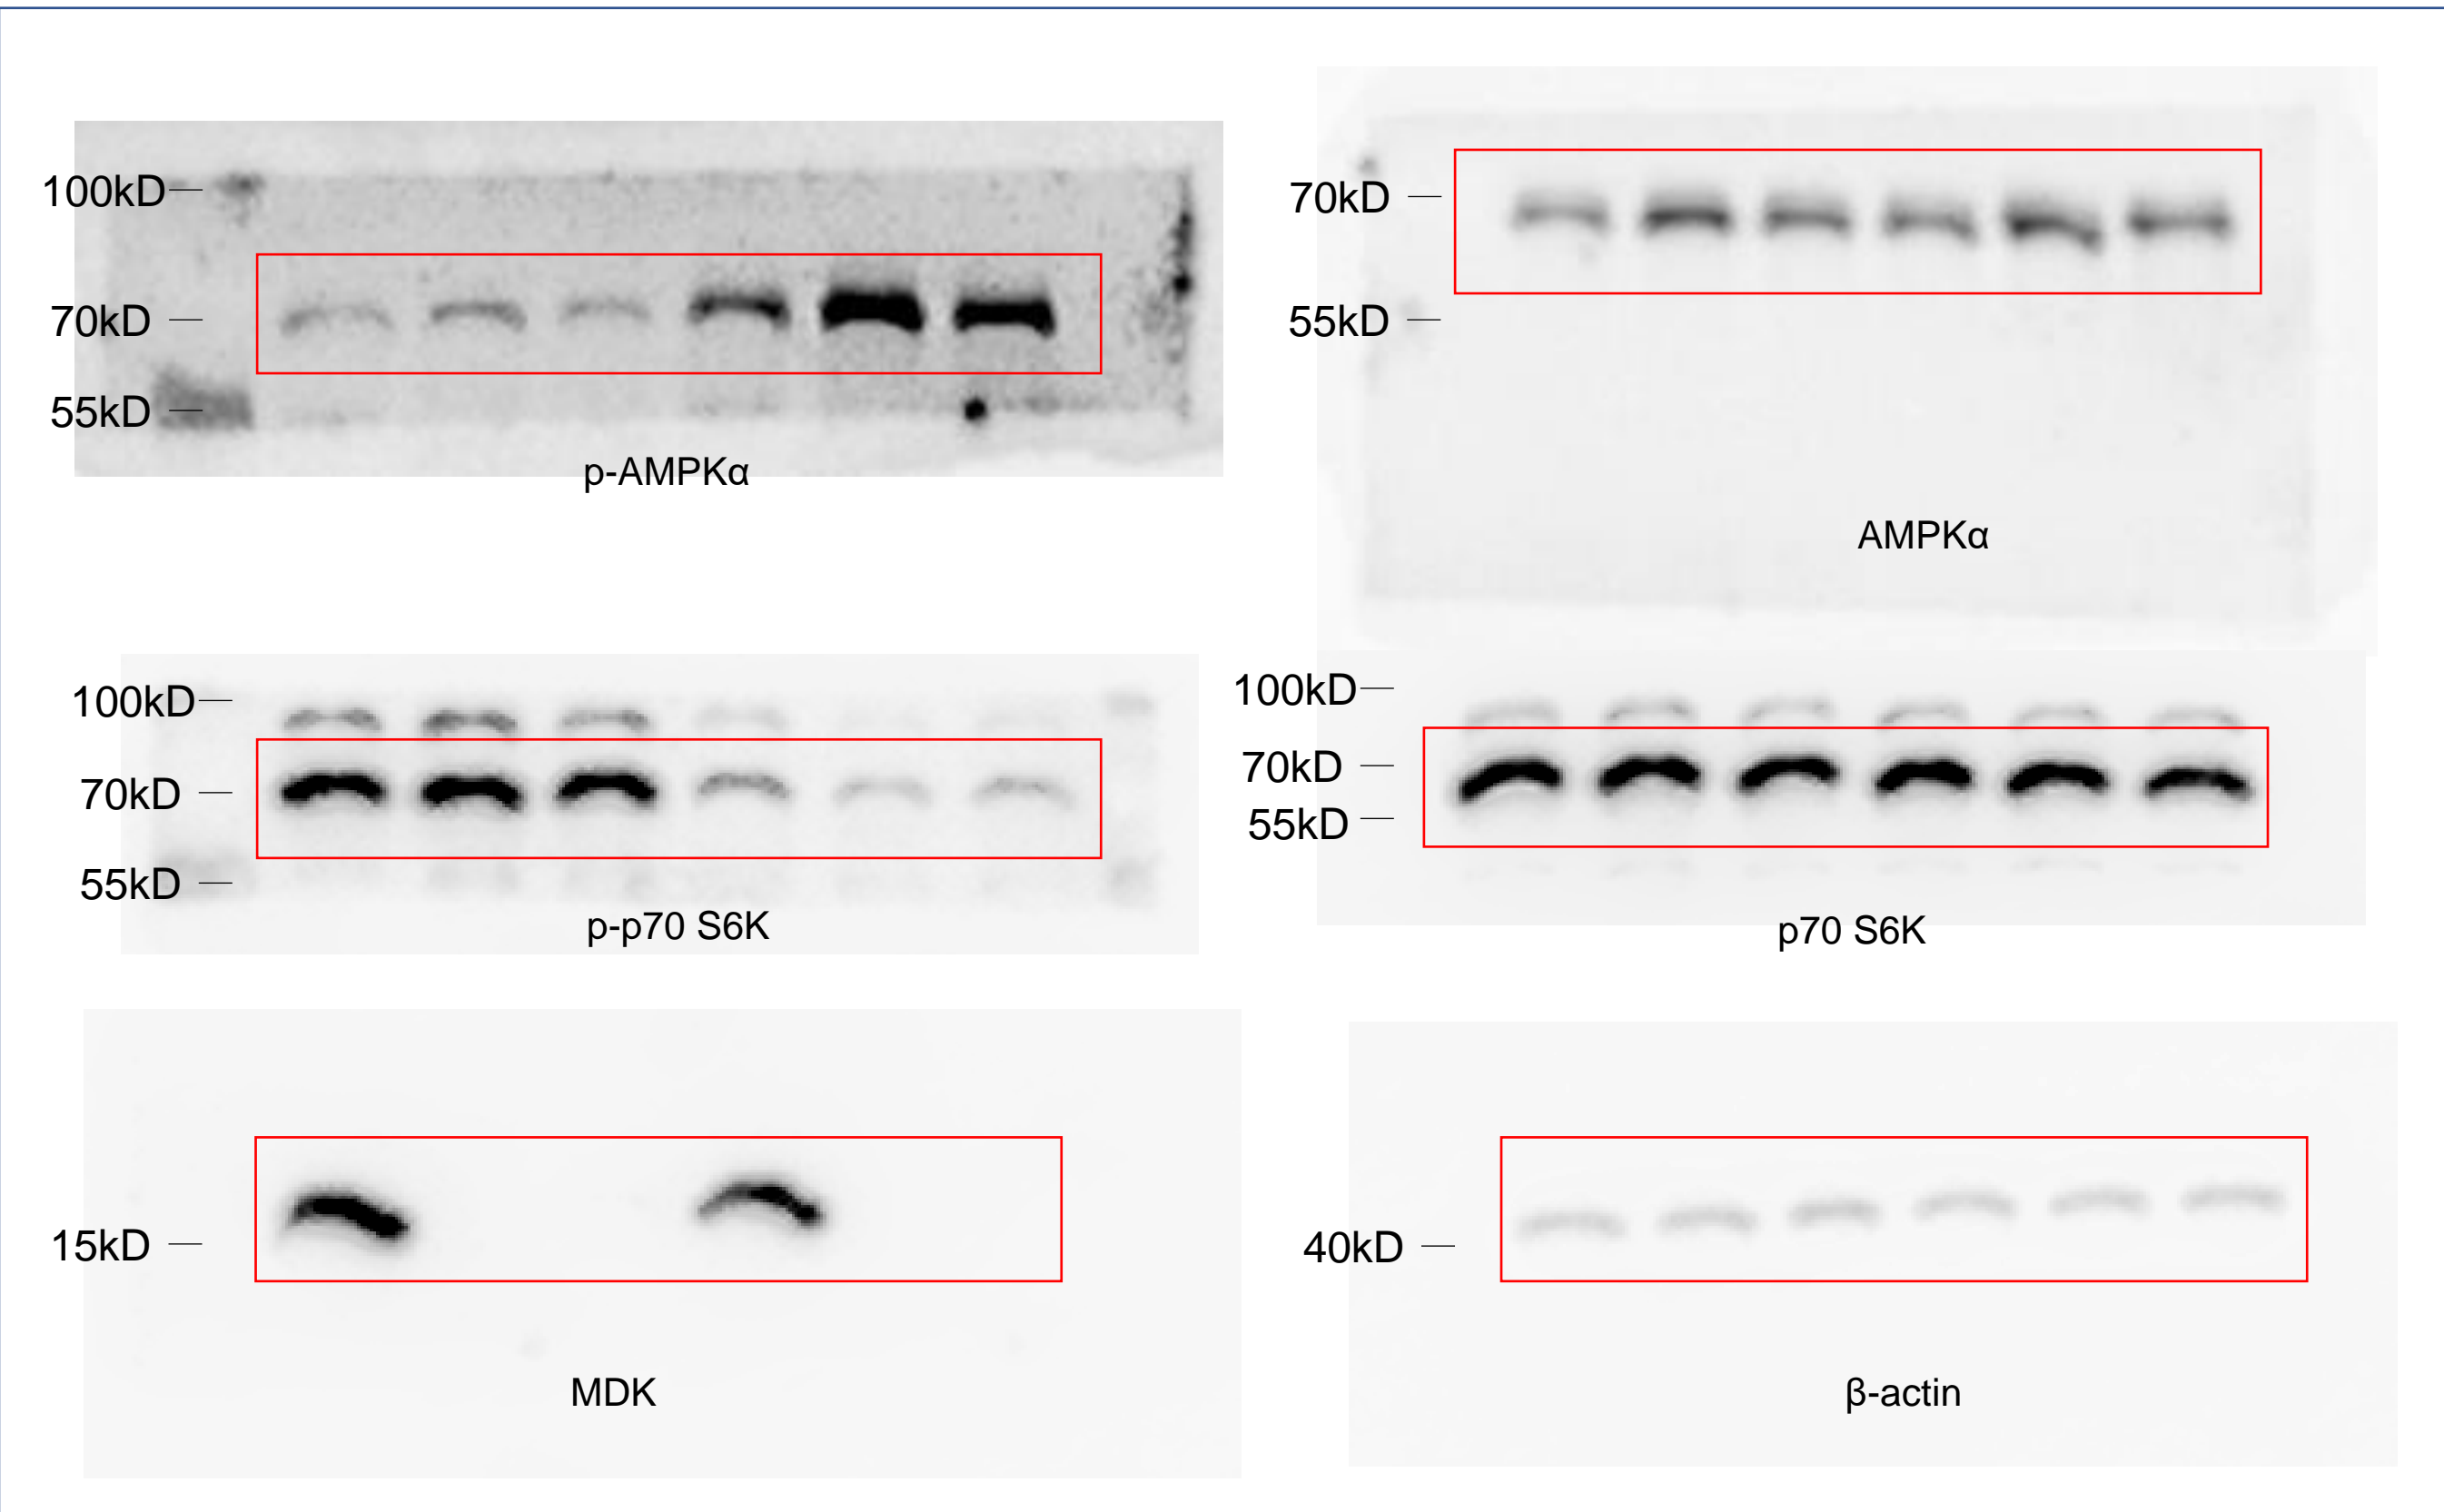

Fig.11

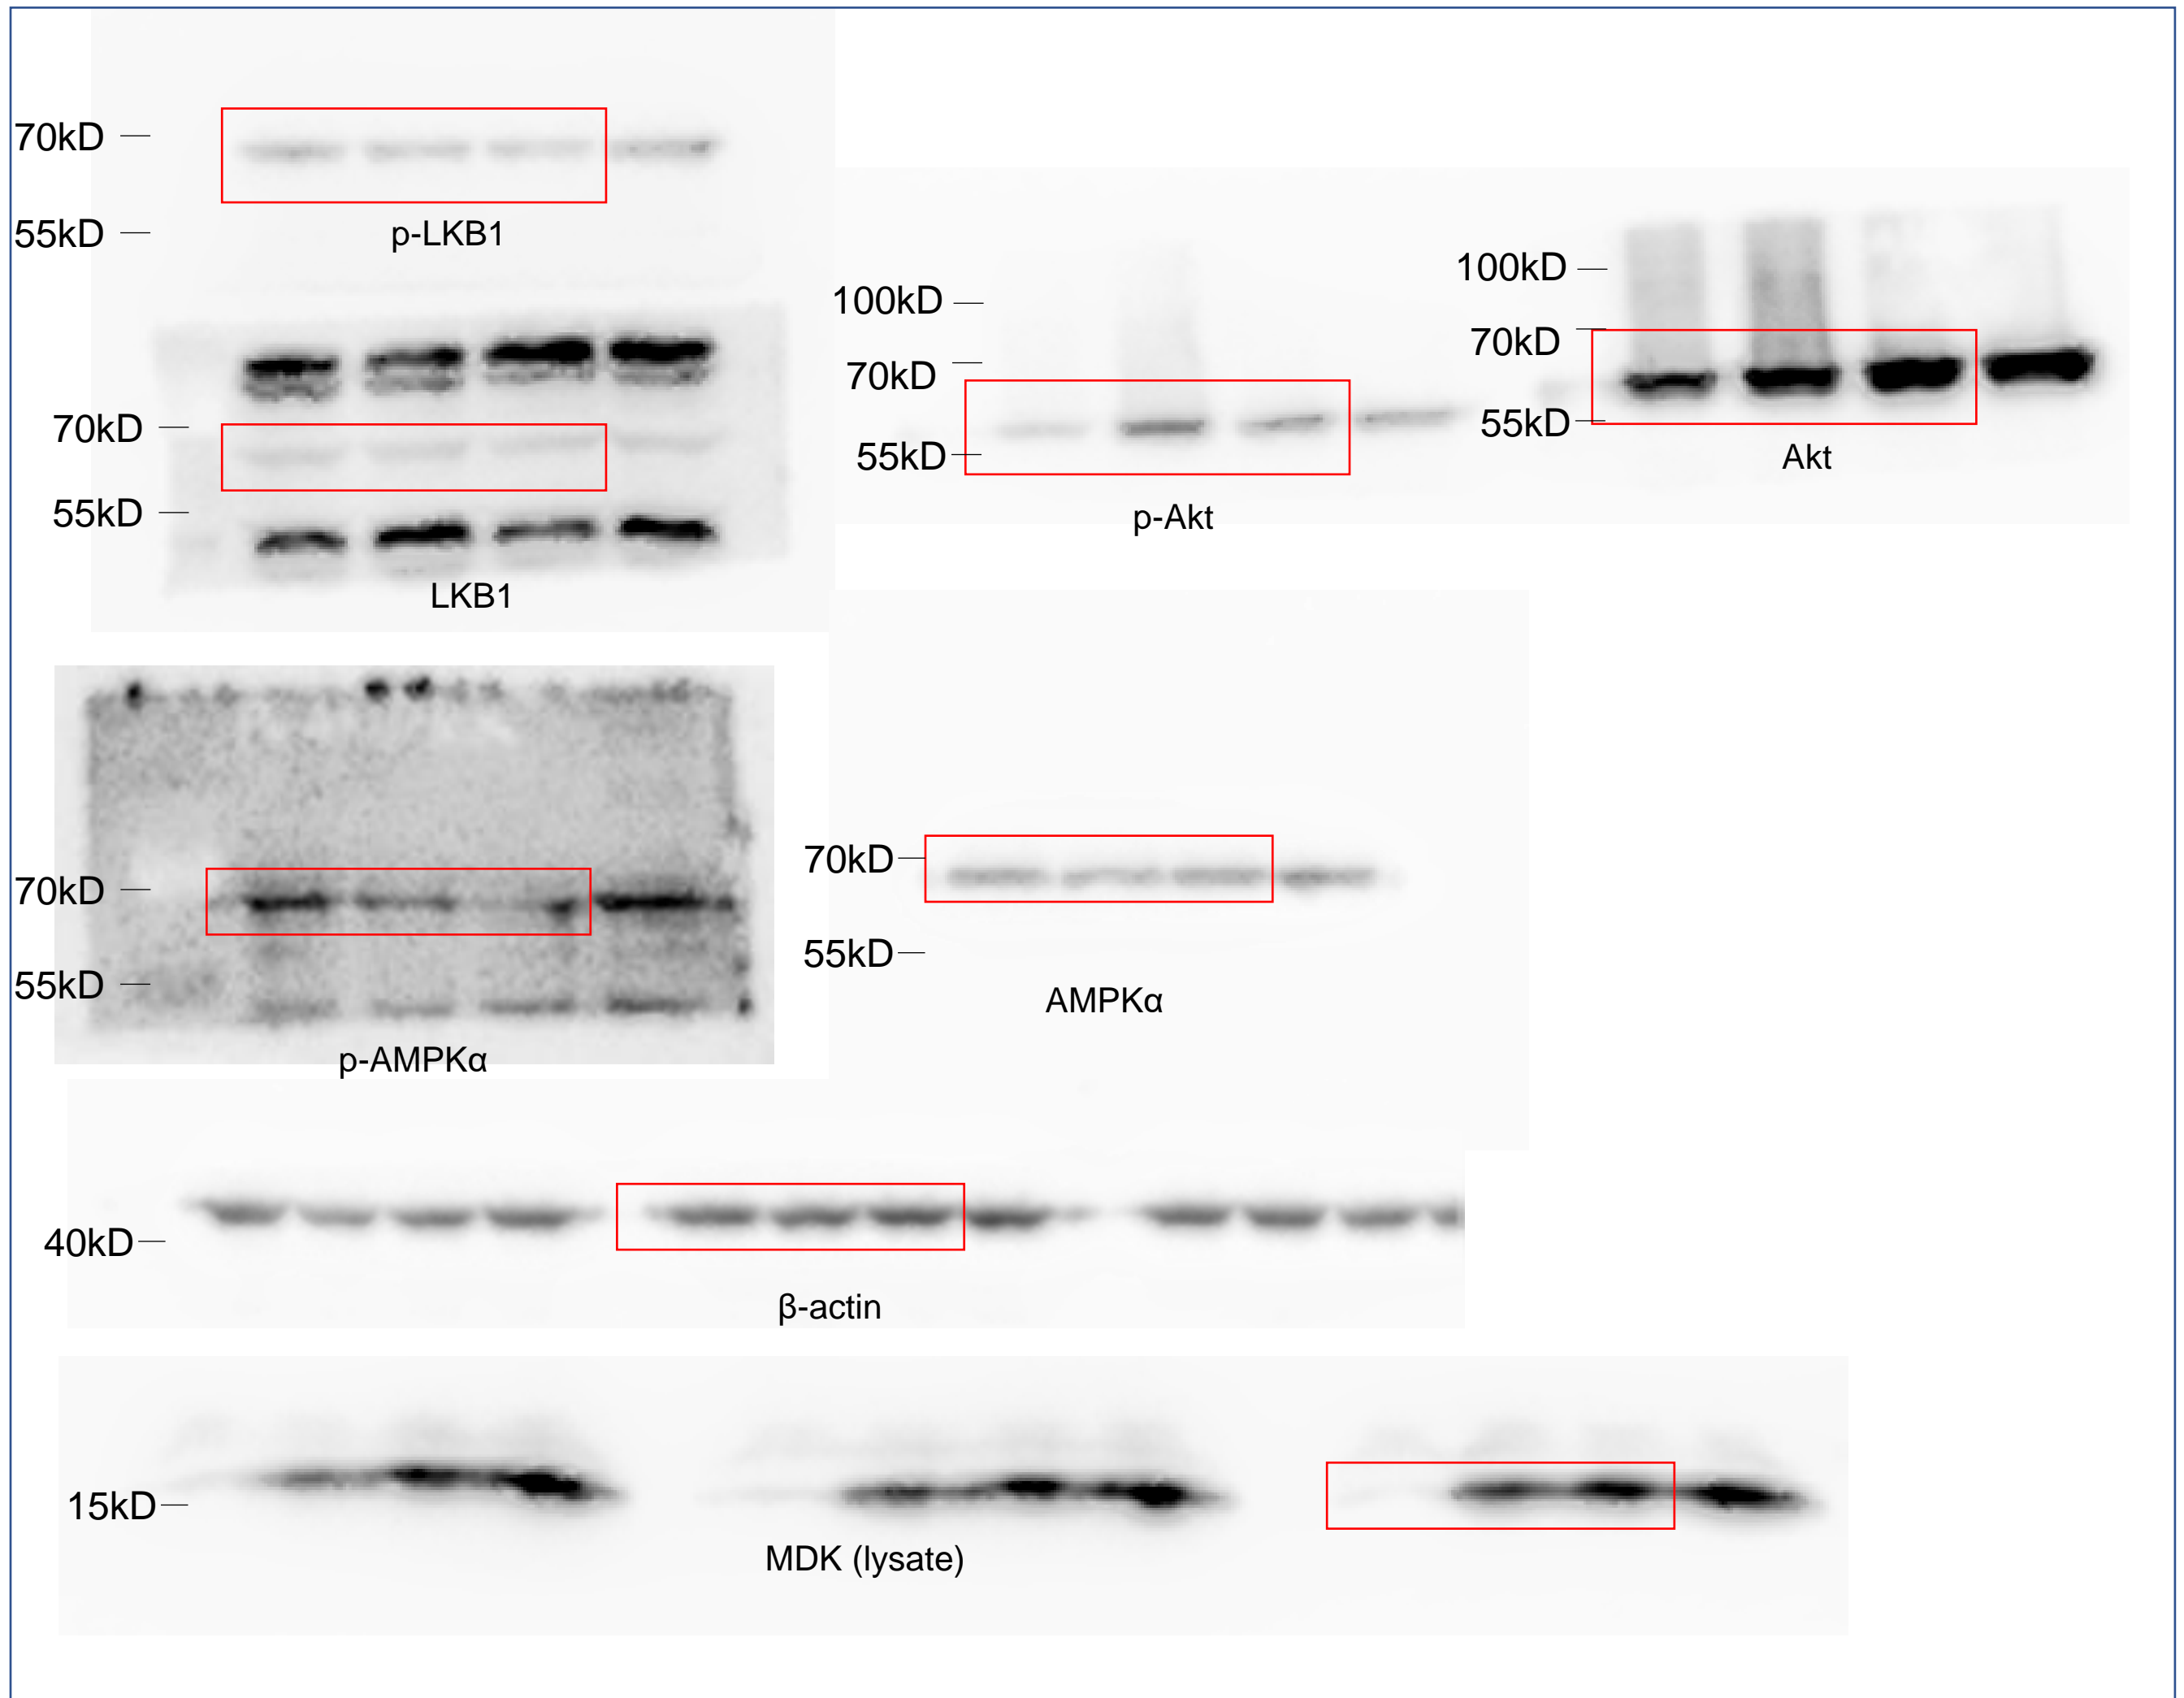

Fig.1J

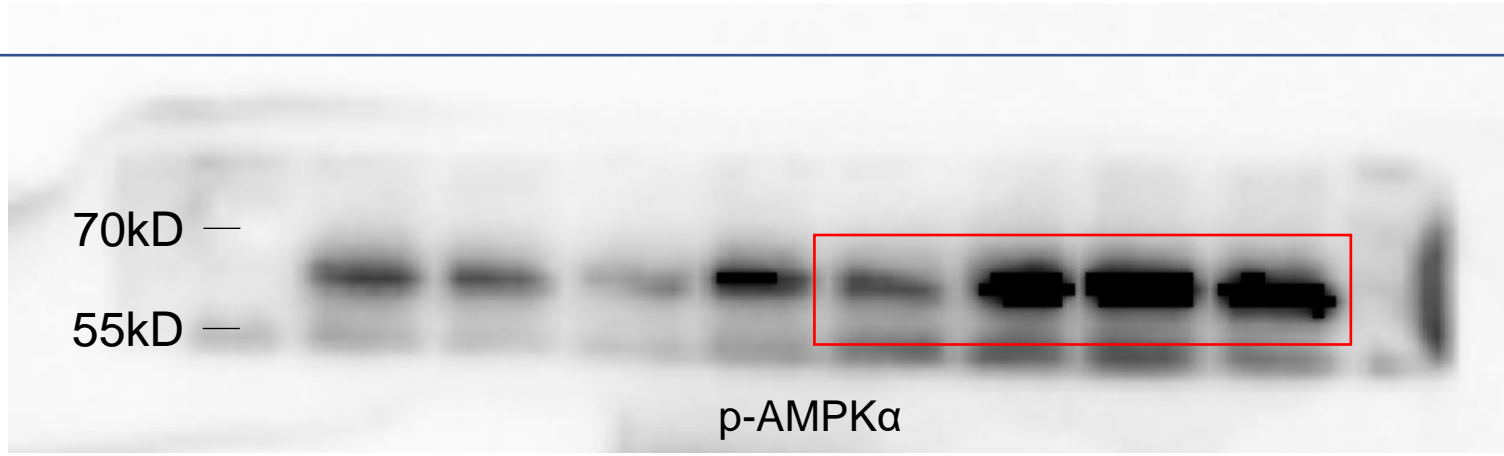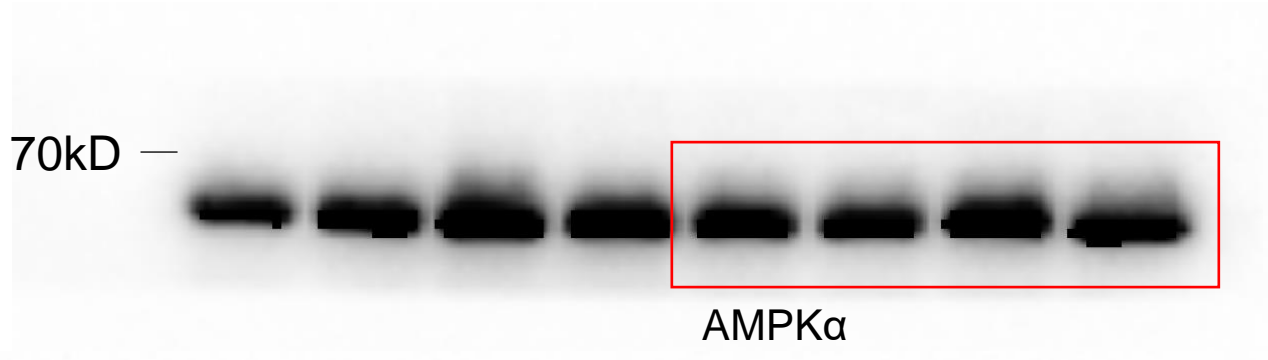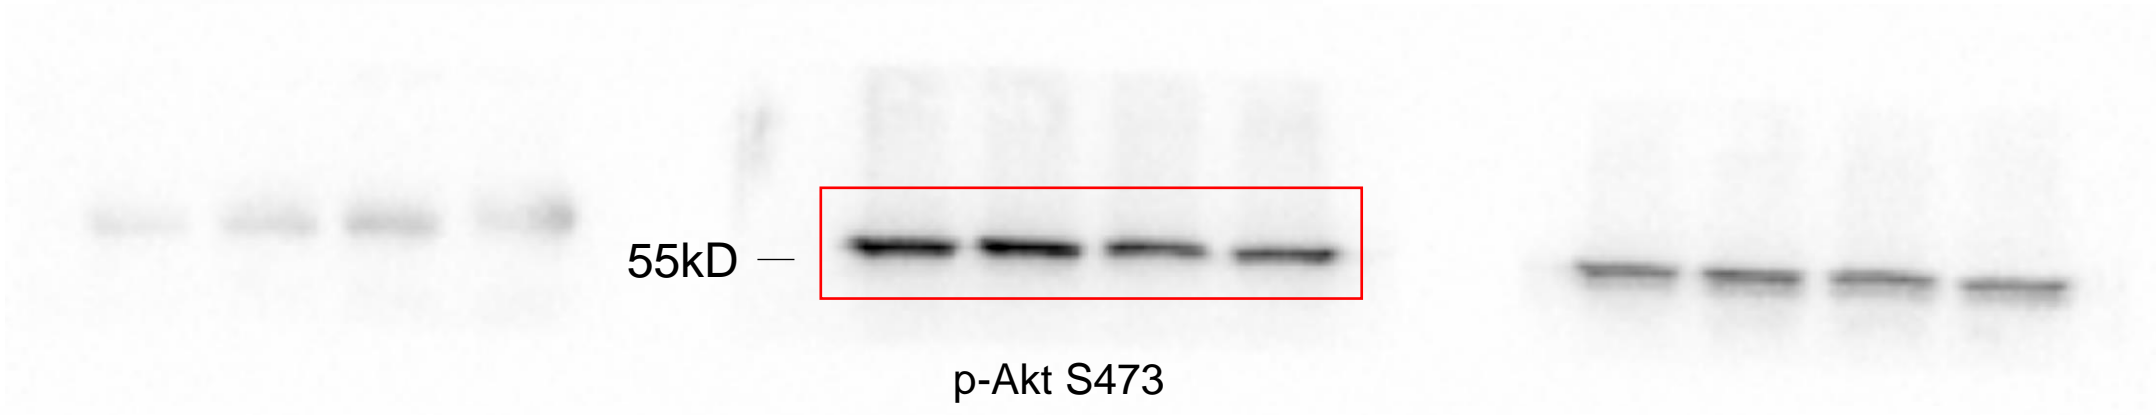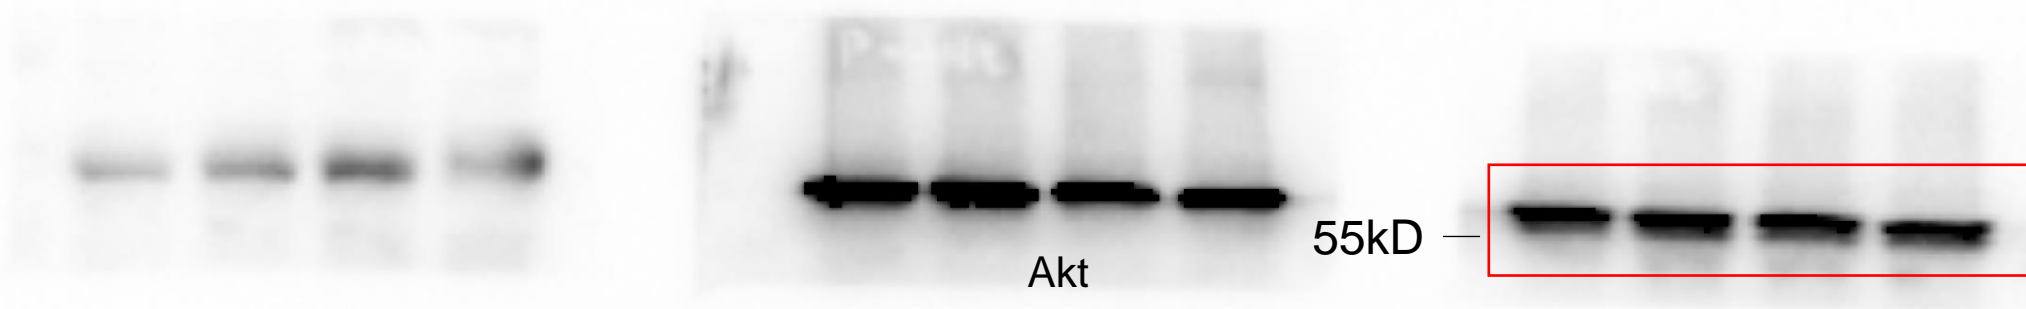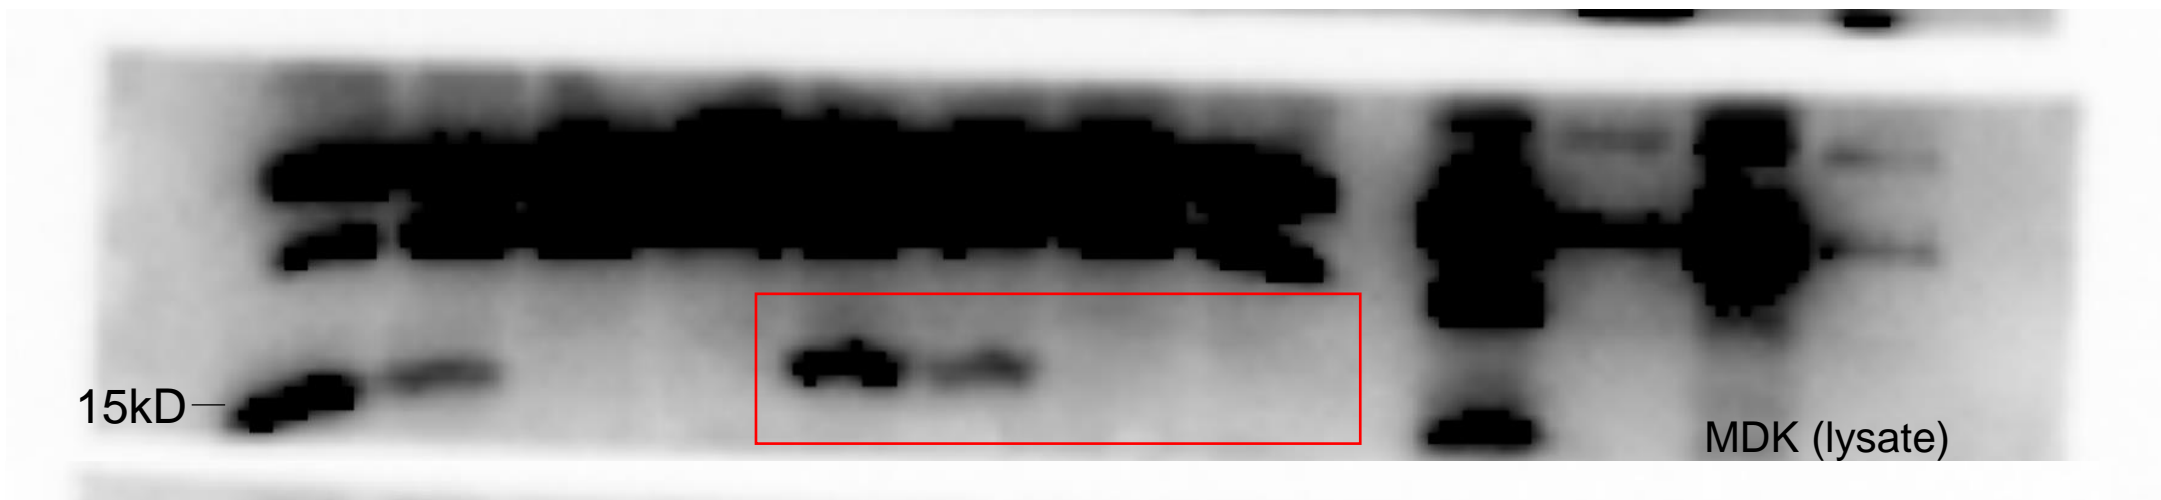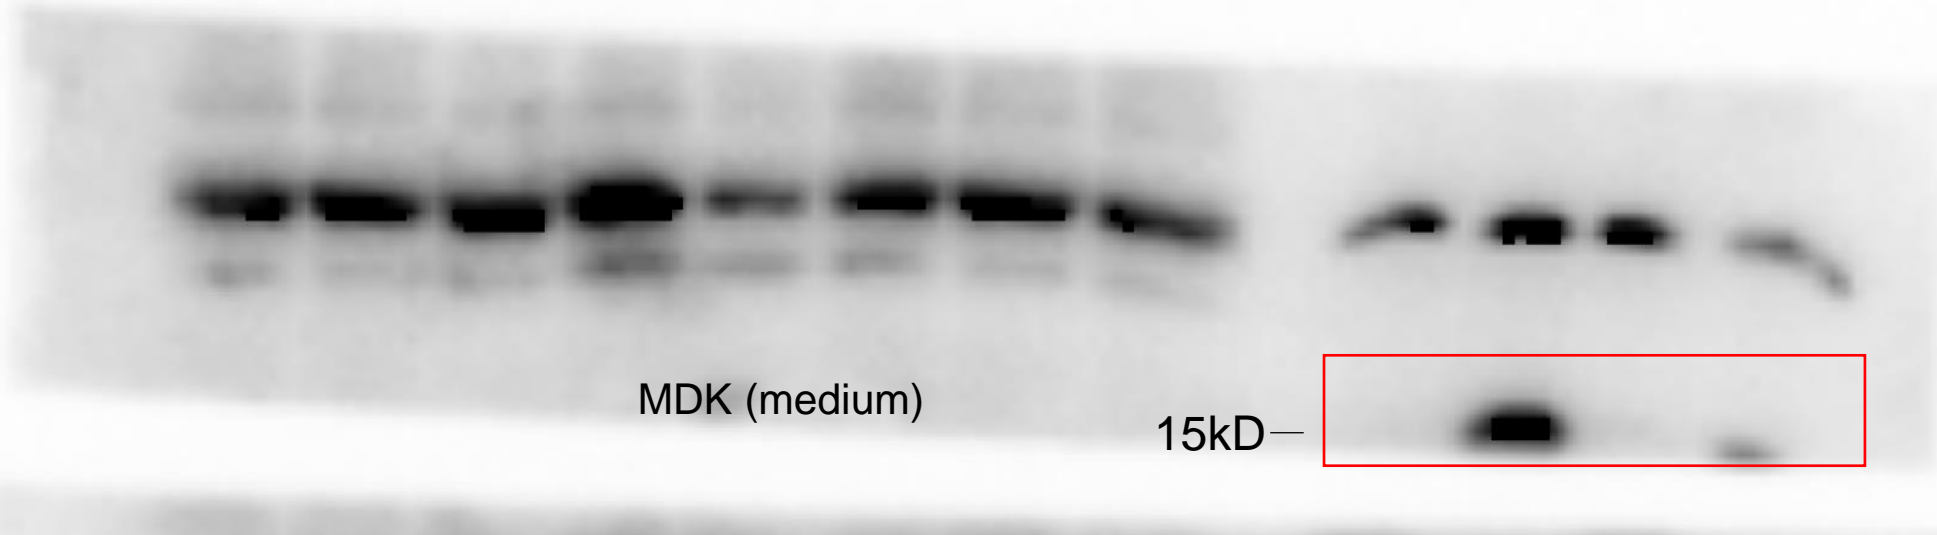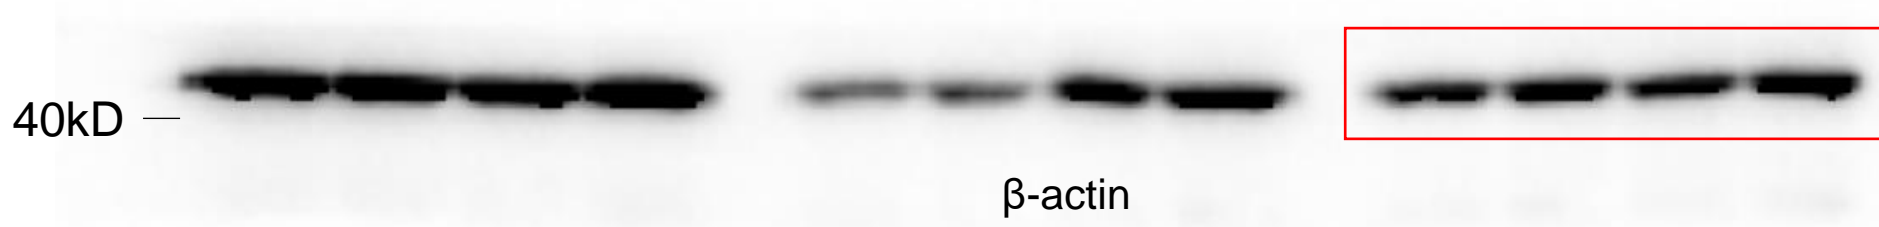

Fig.1K

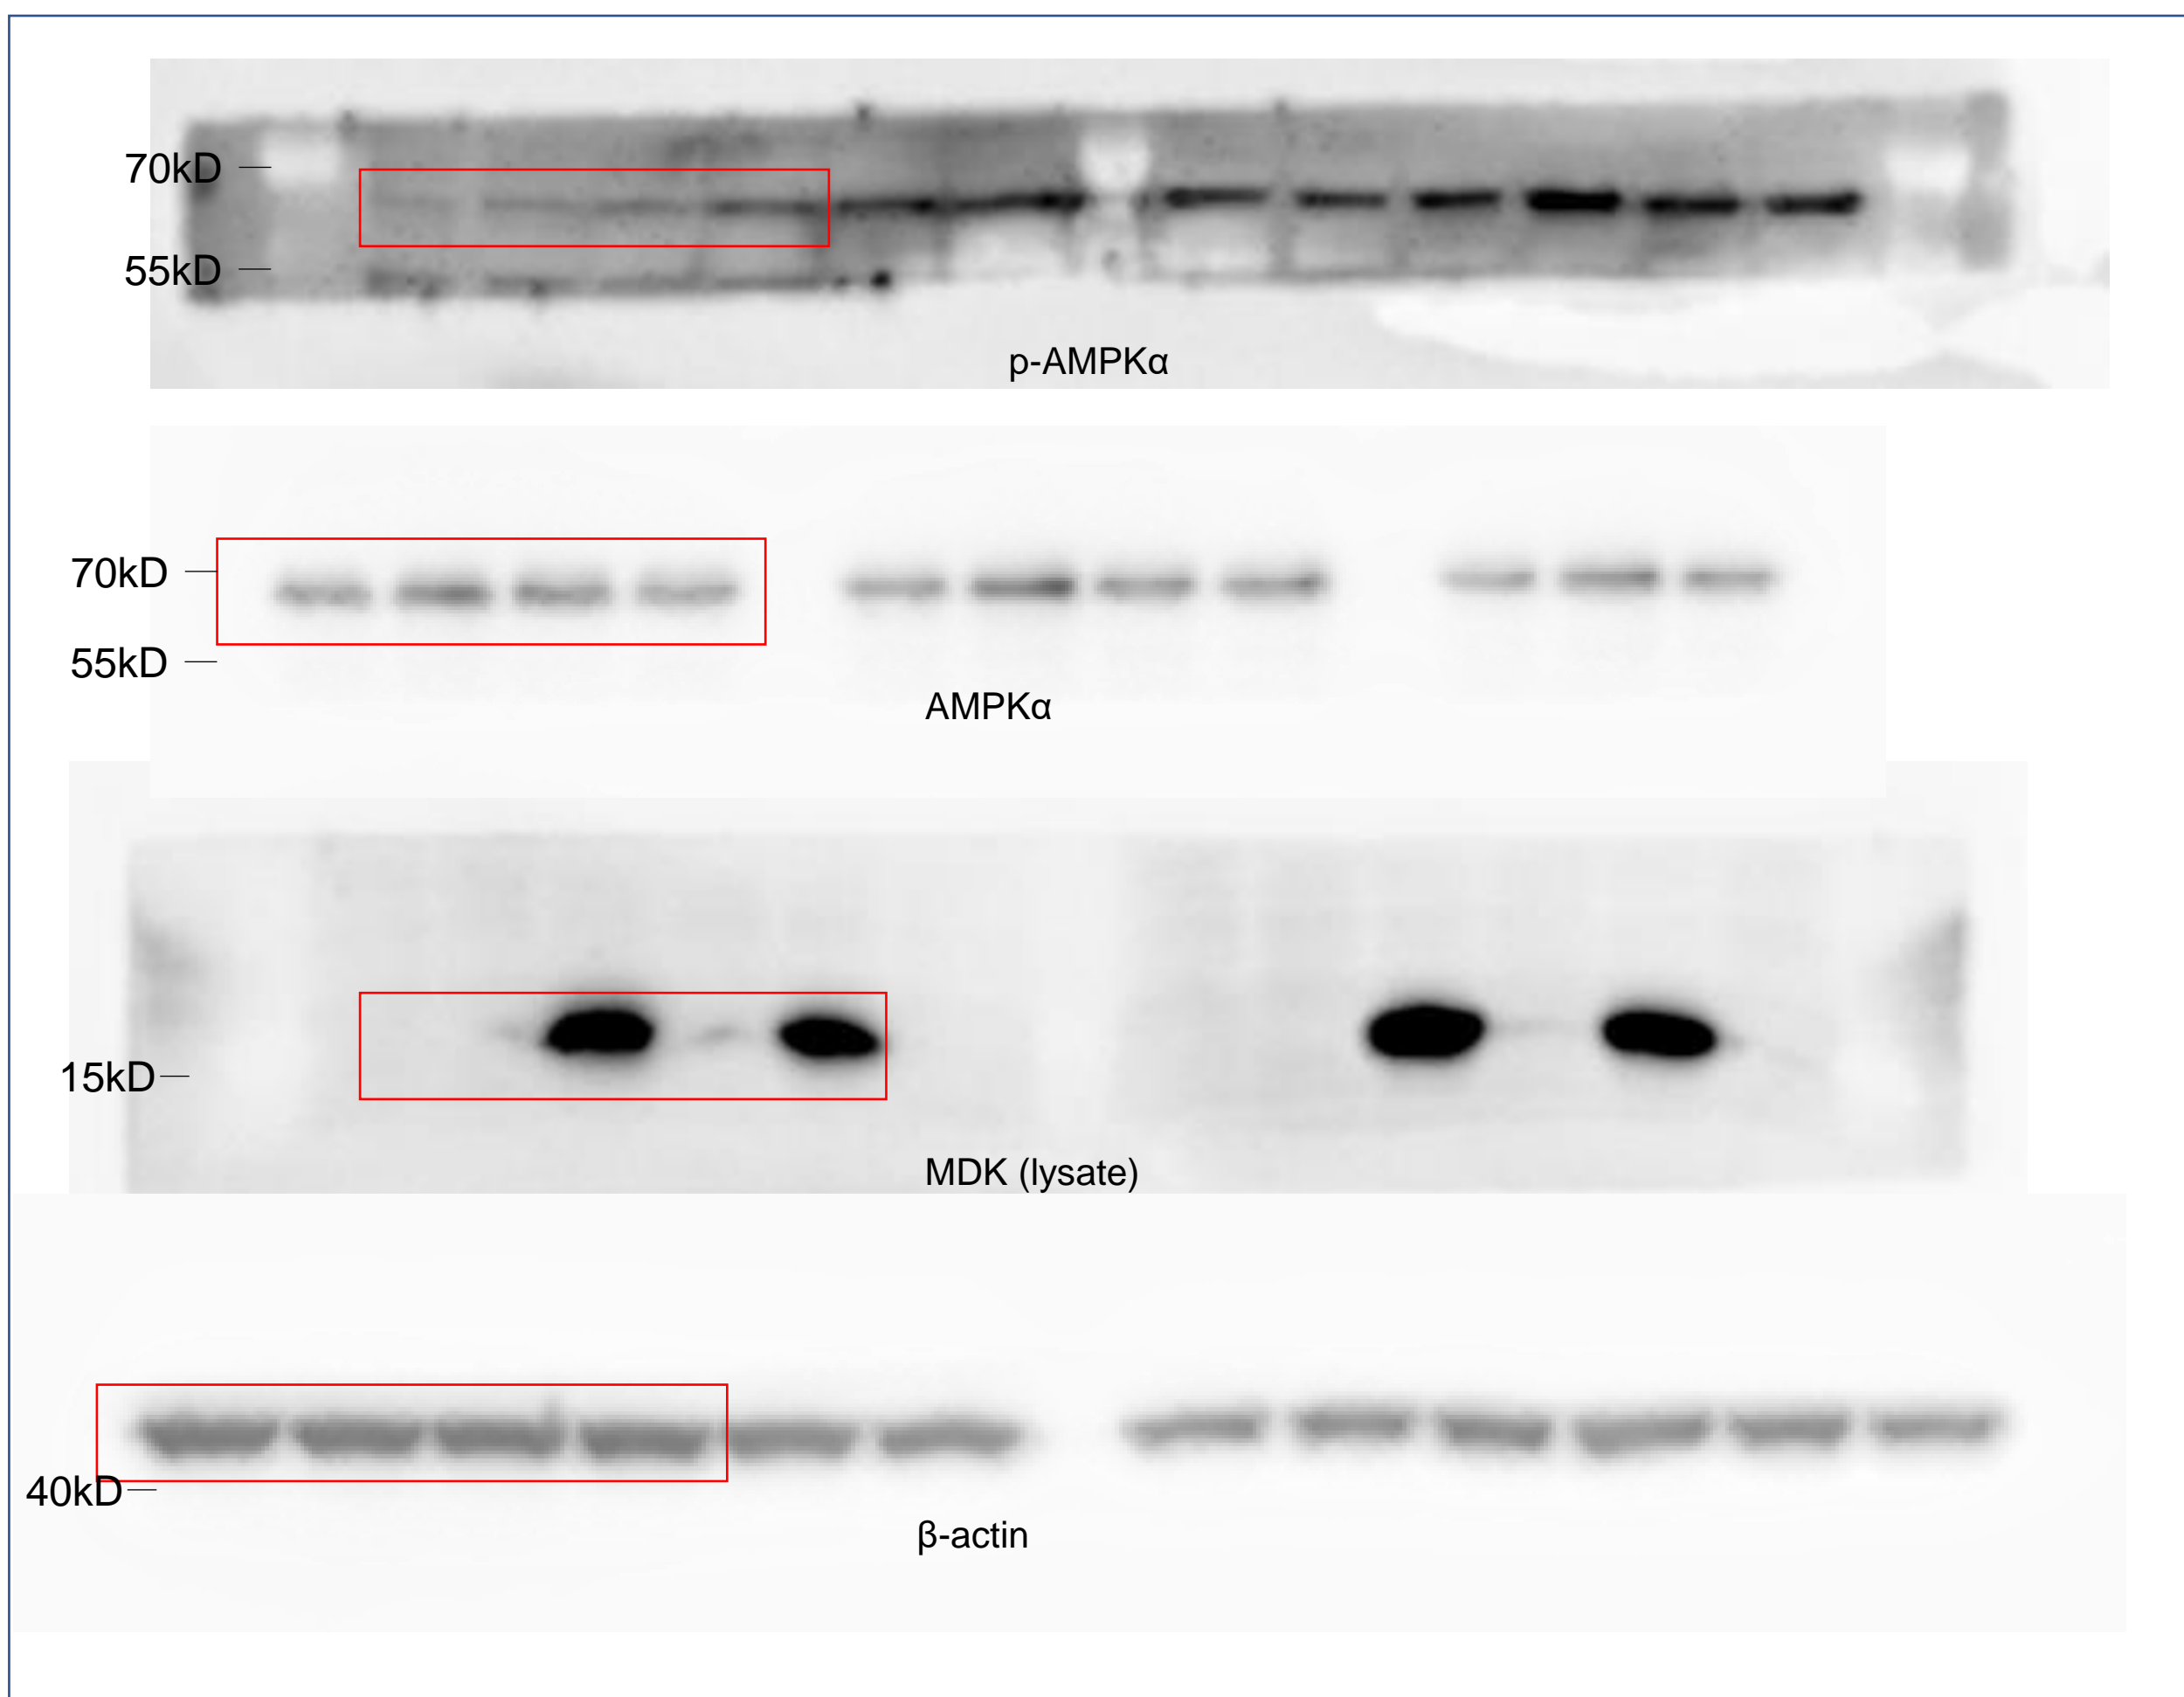

Fig.1L

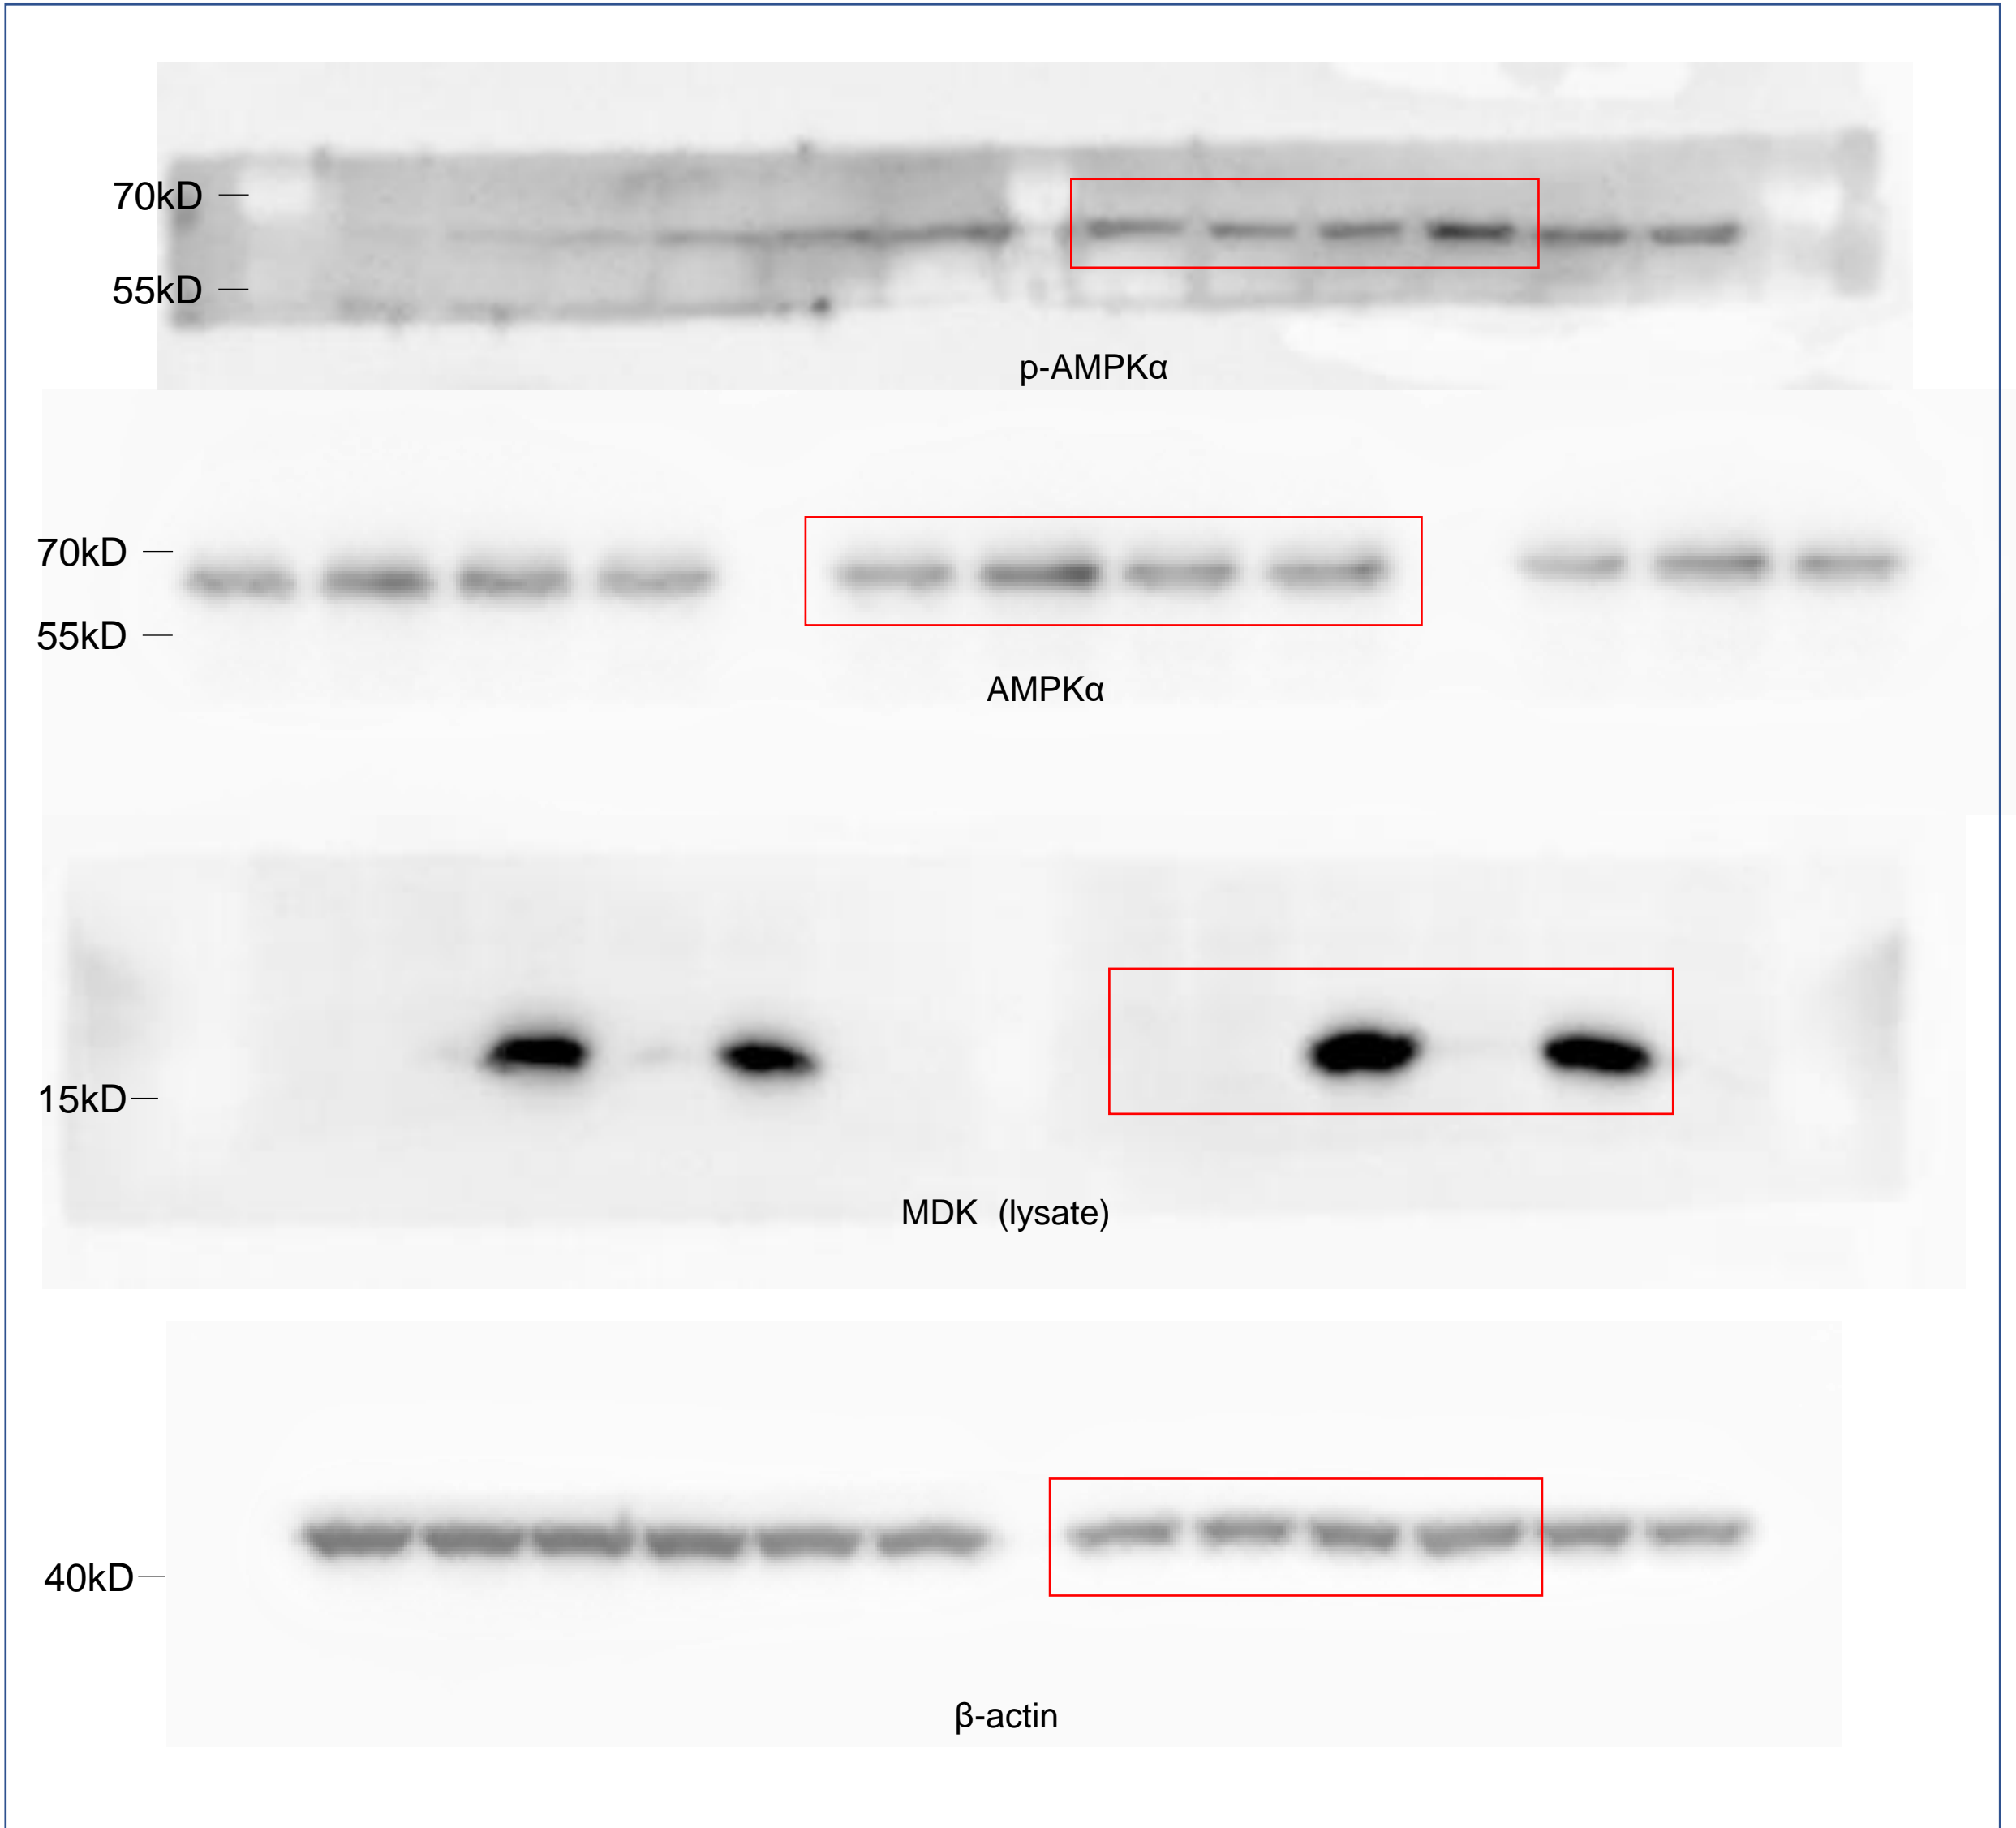



Fig.2B

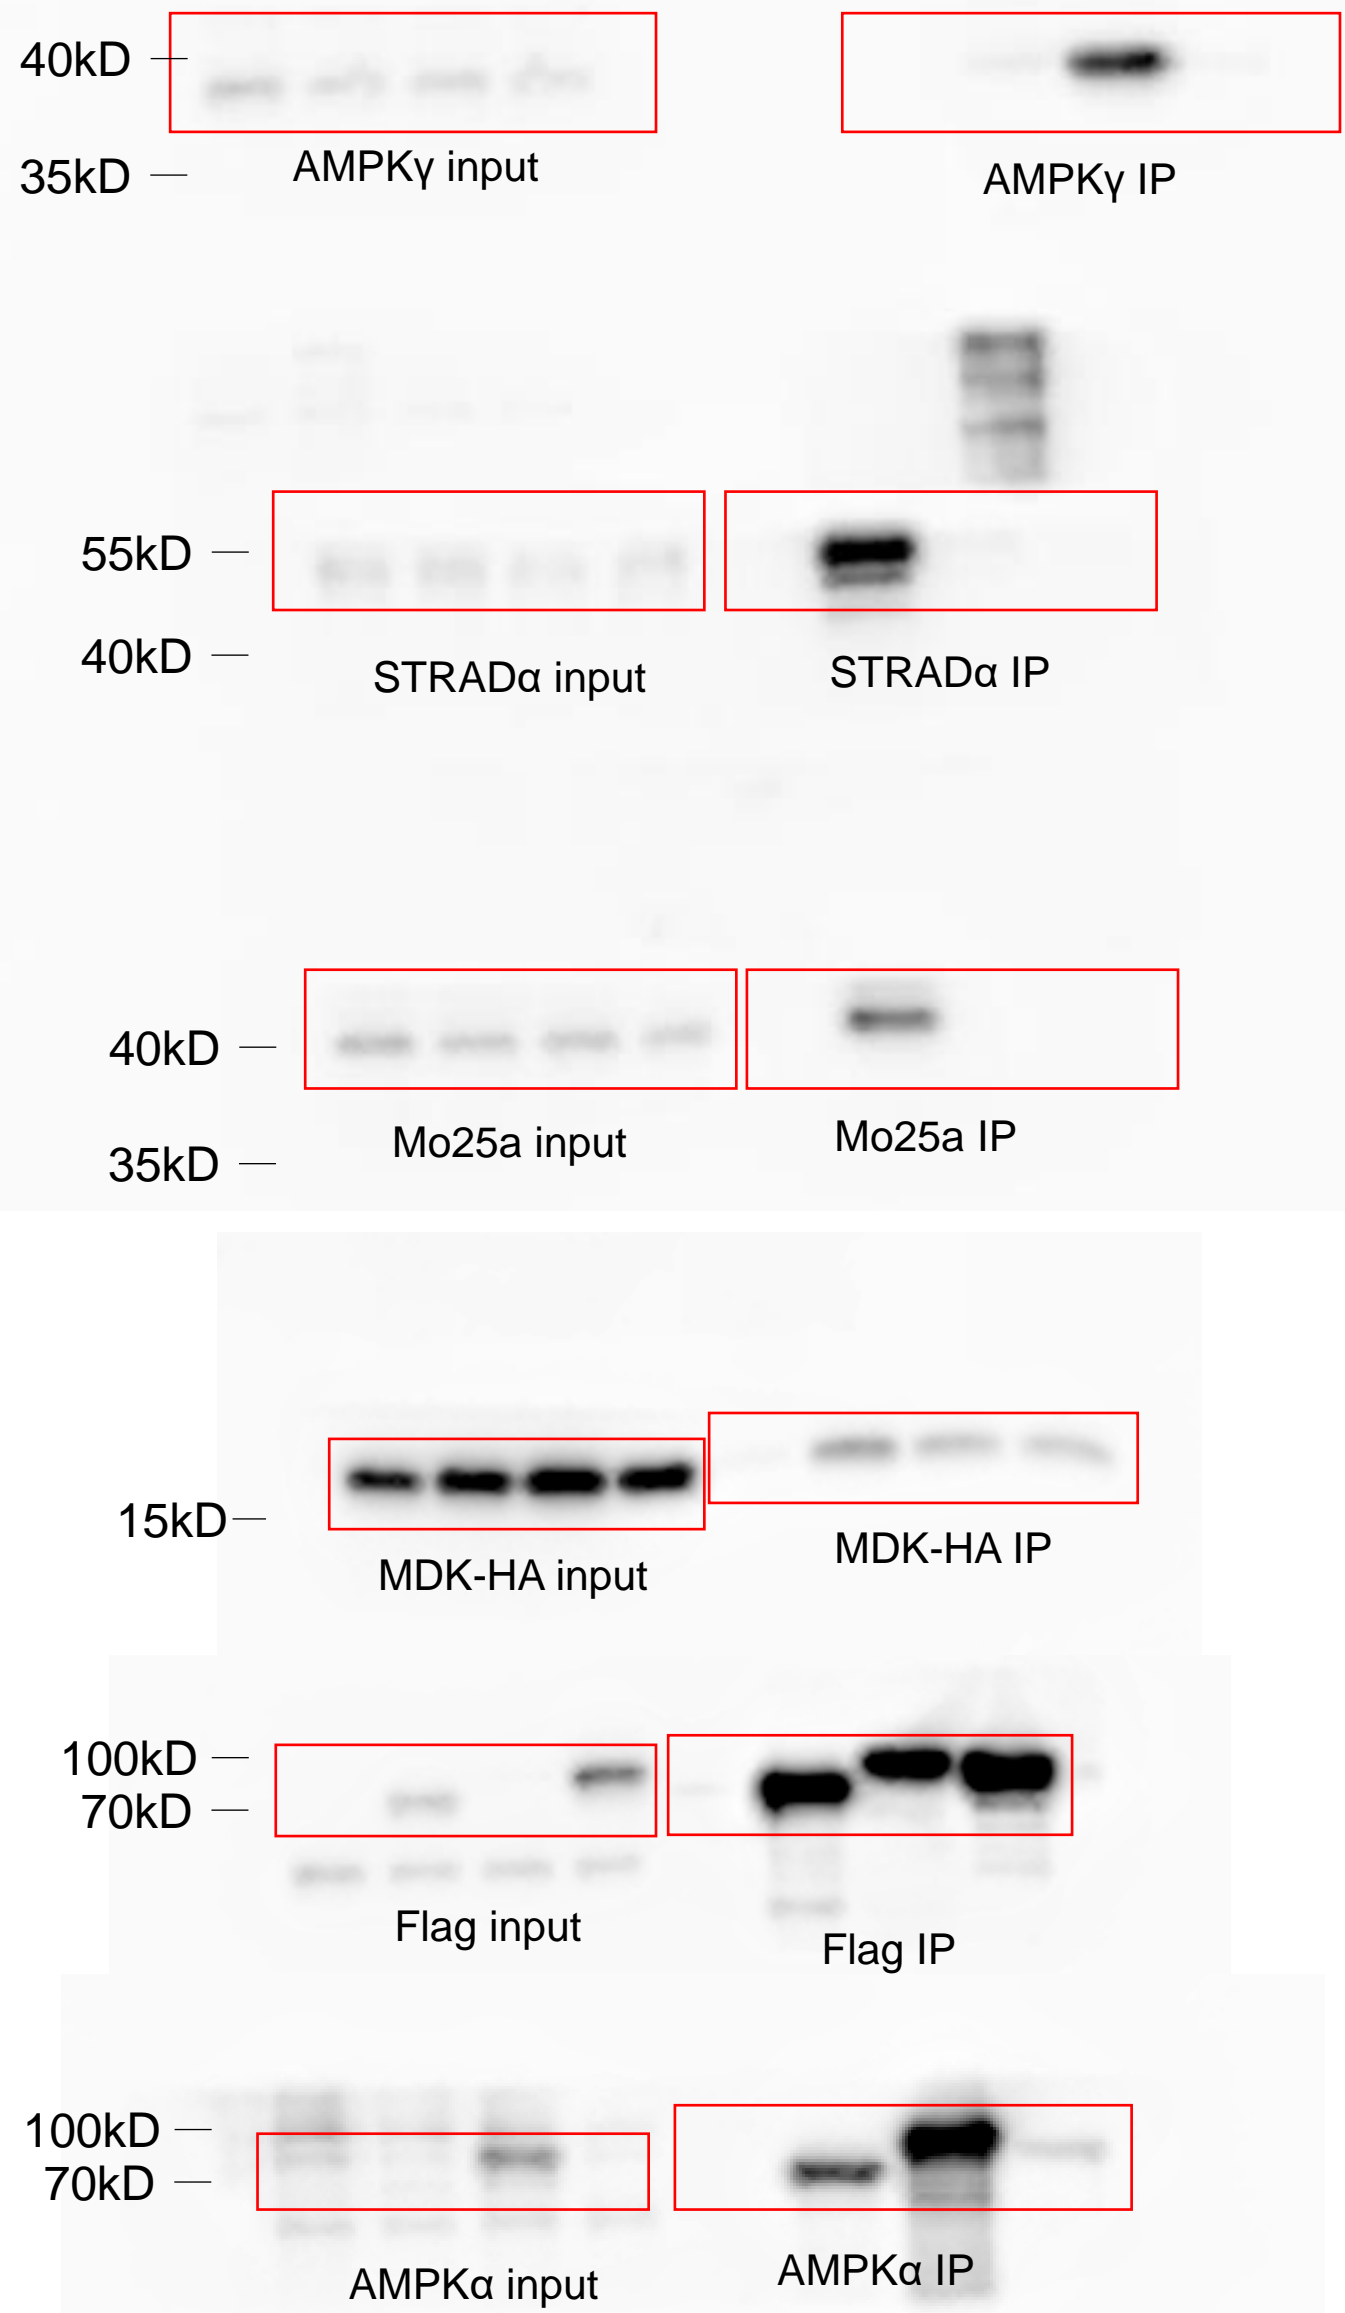

Fig.2C

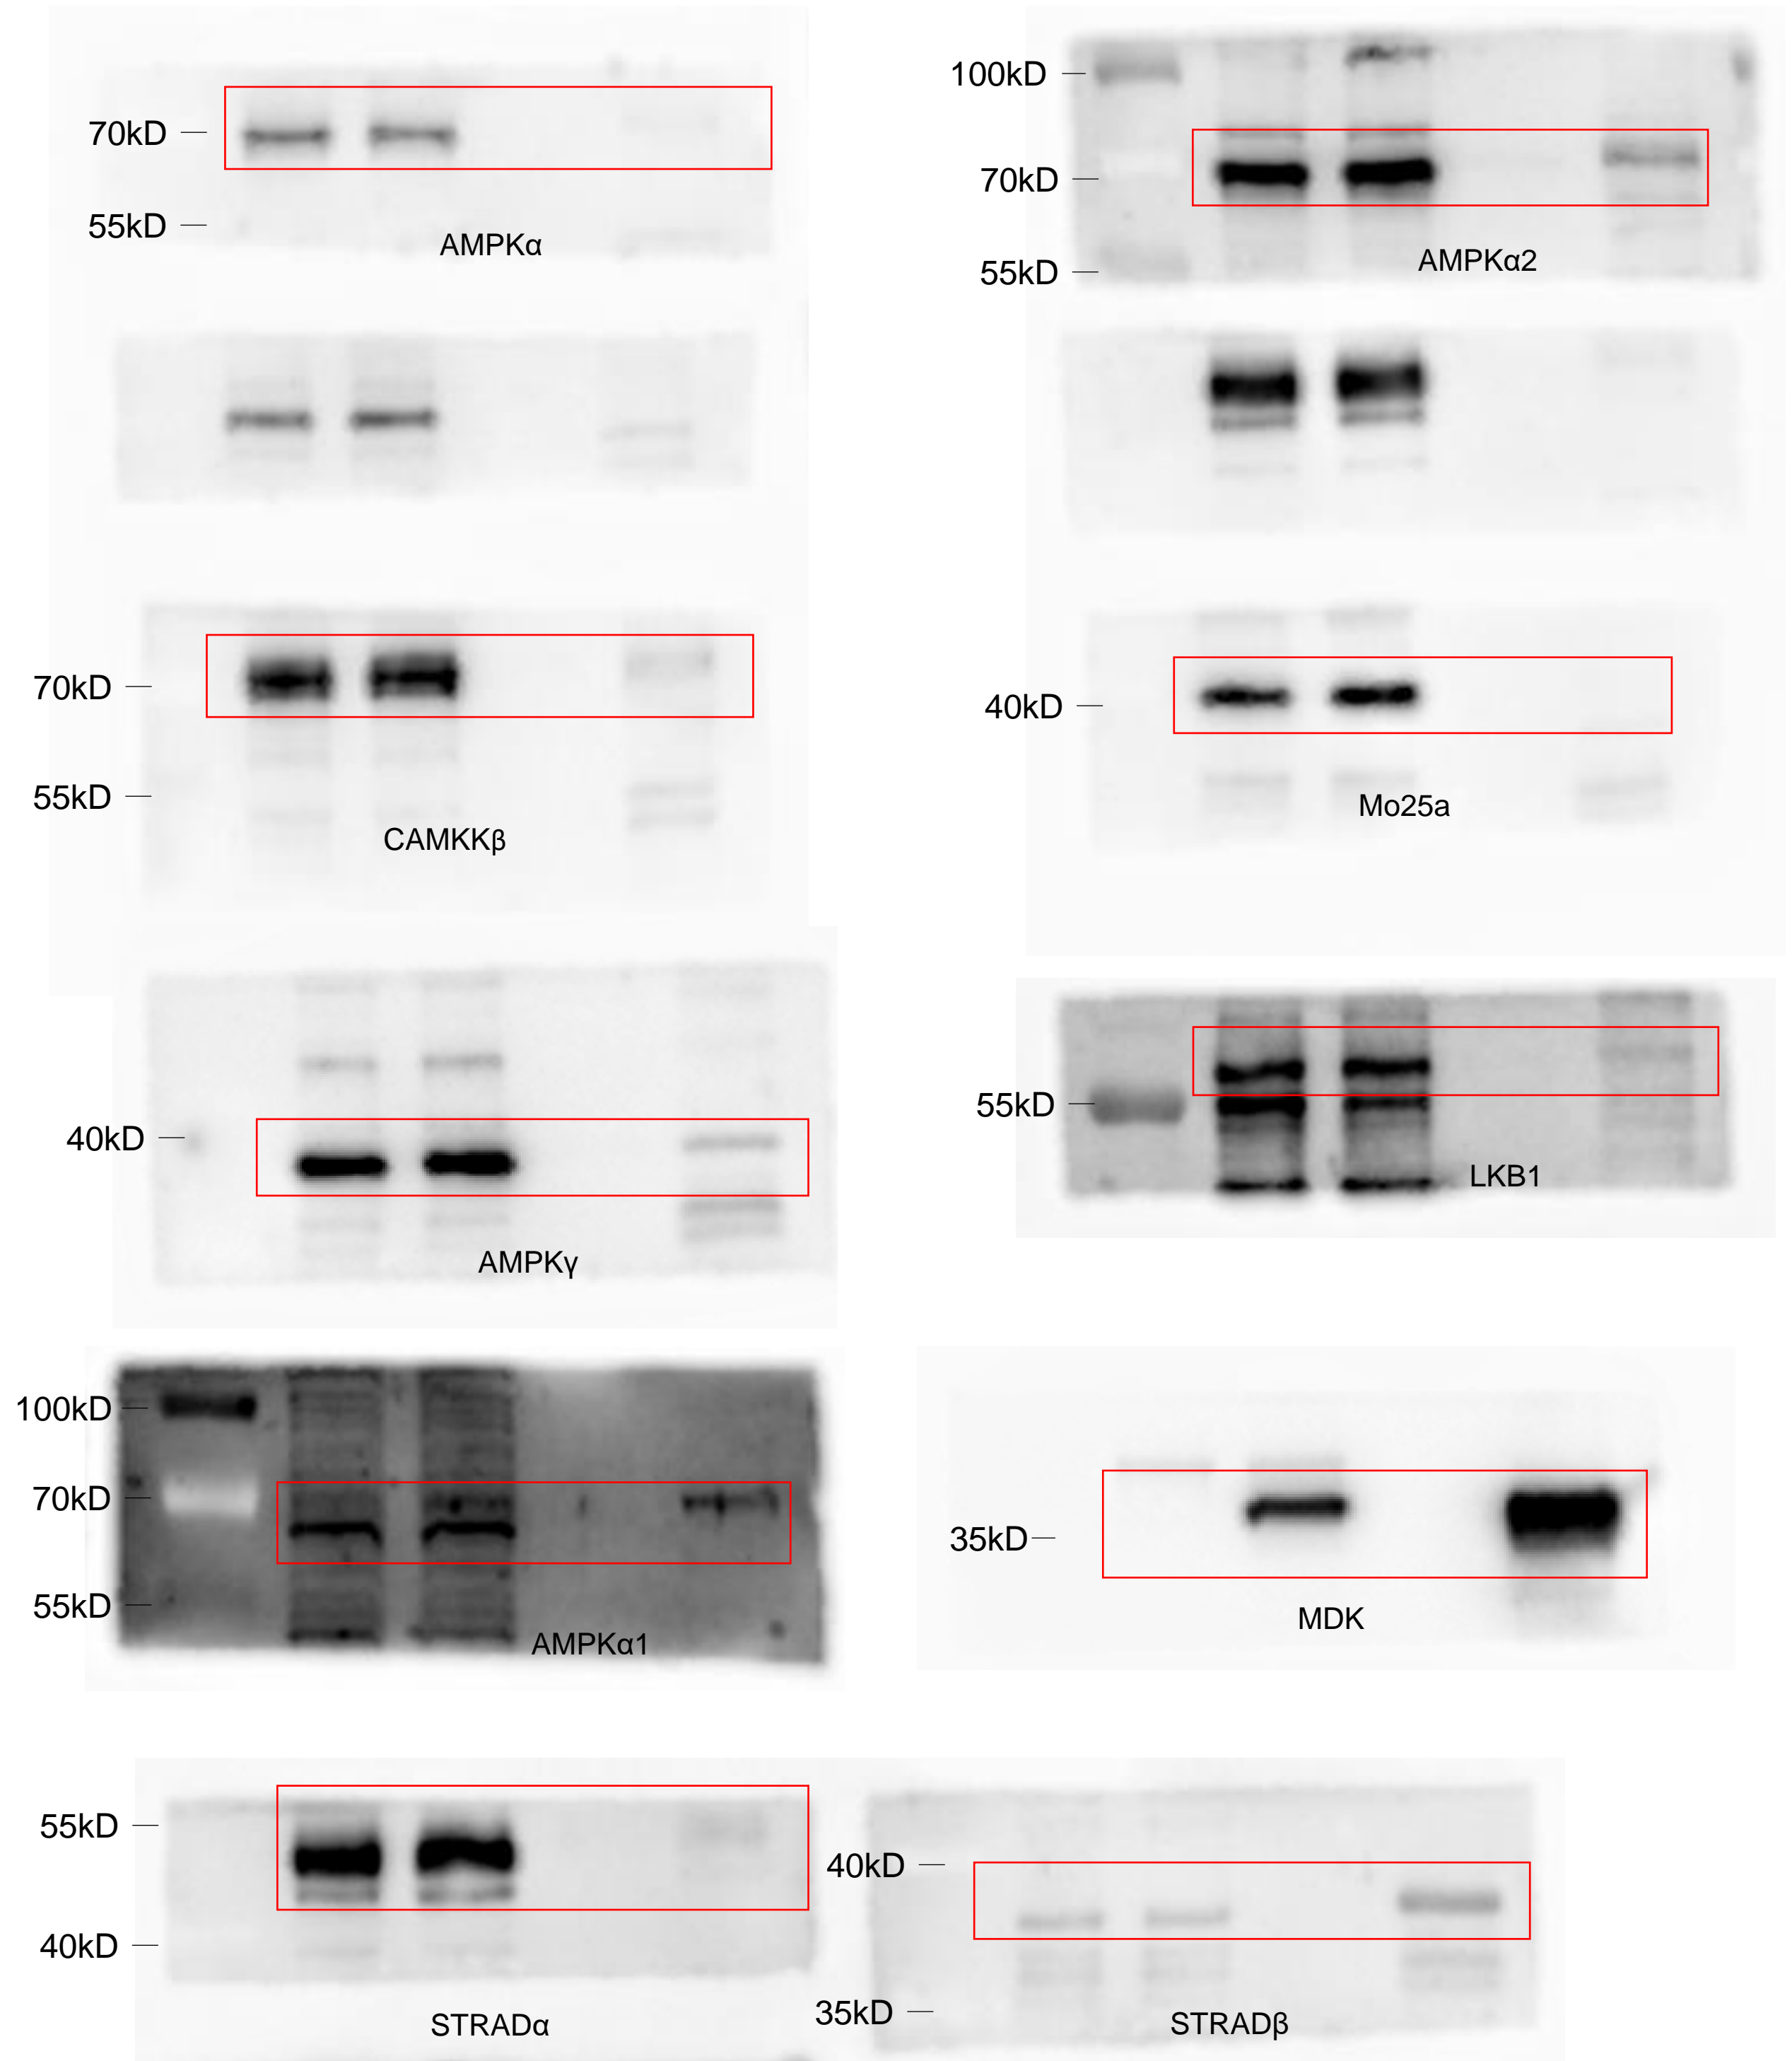

Fig.2D-E

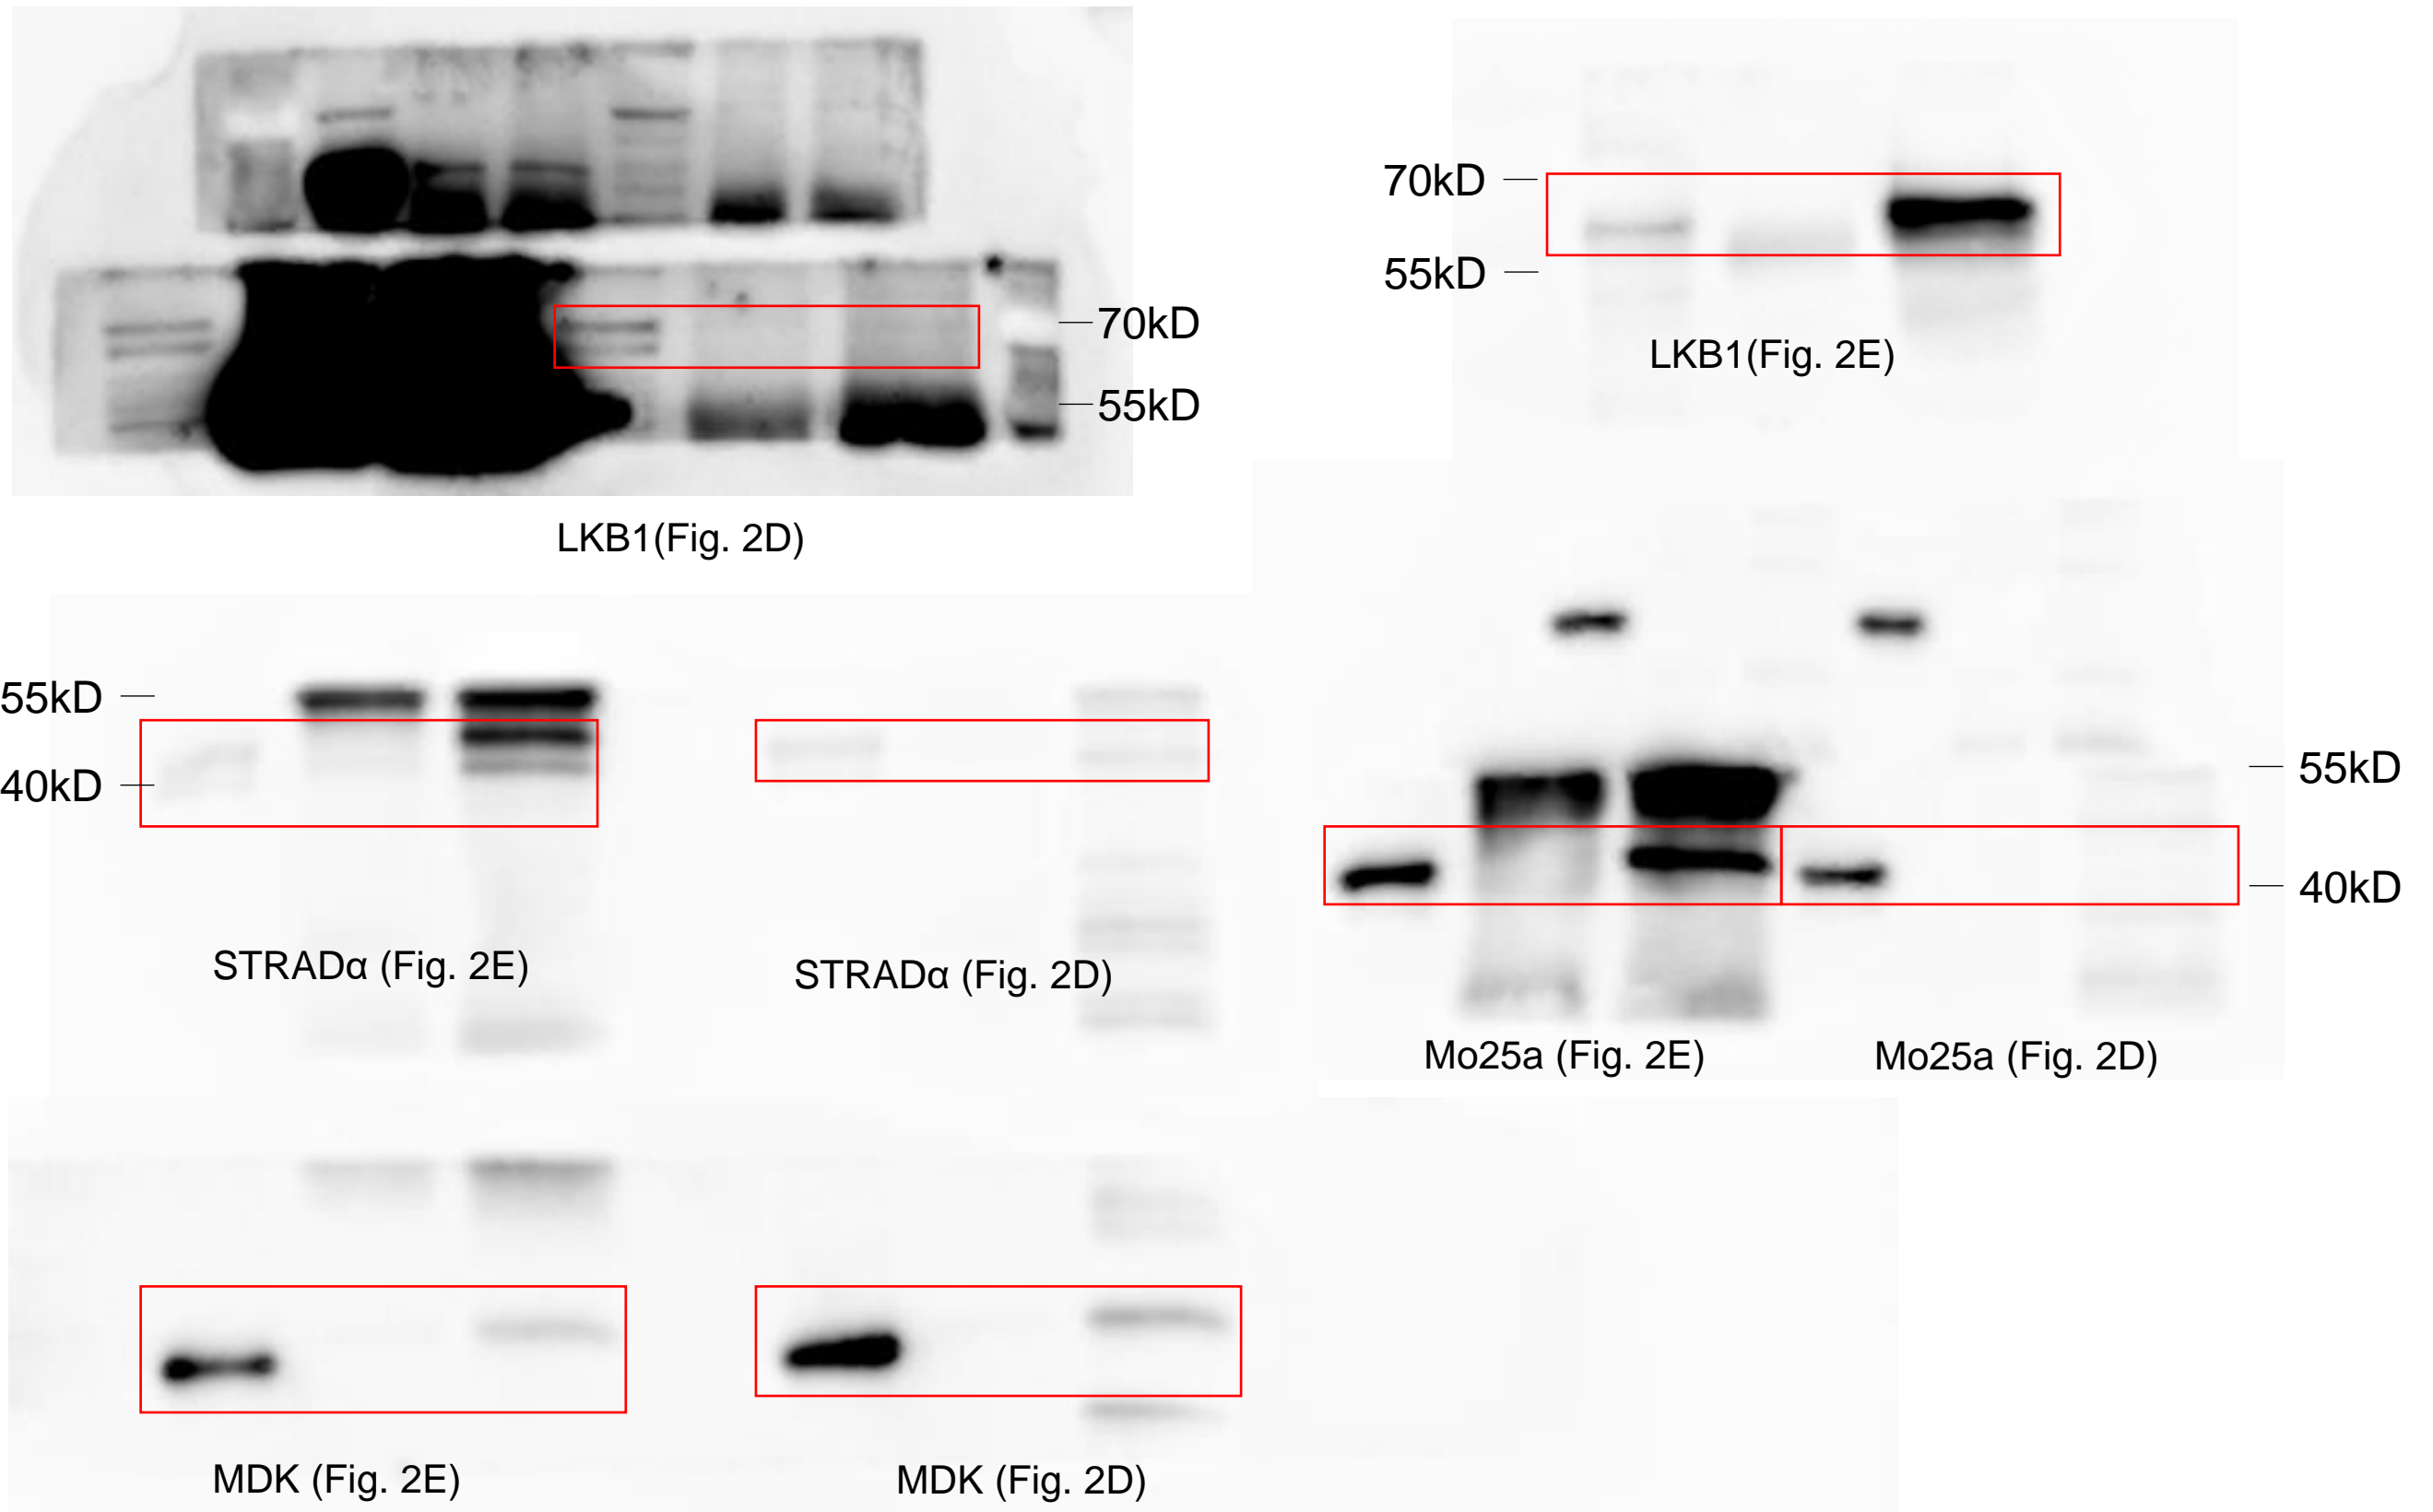

Fig.2F

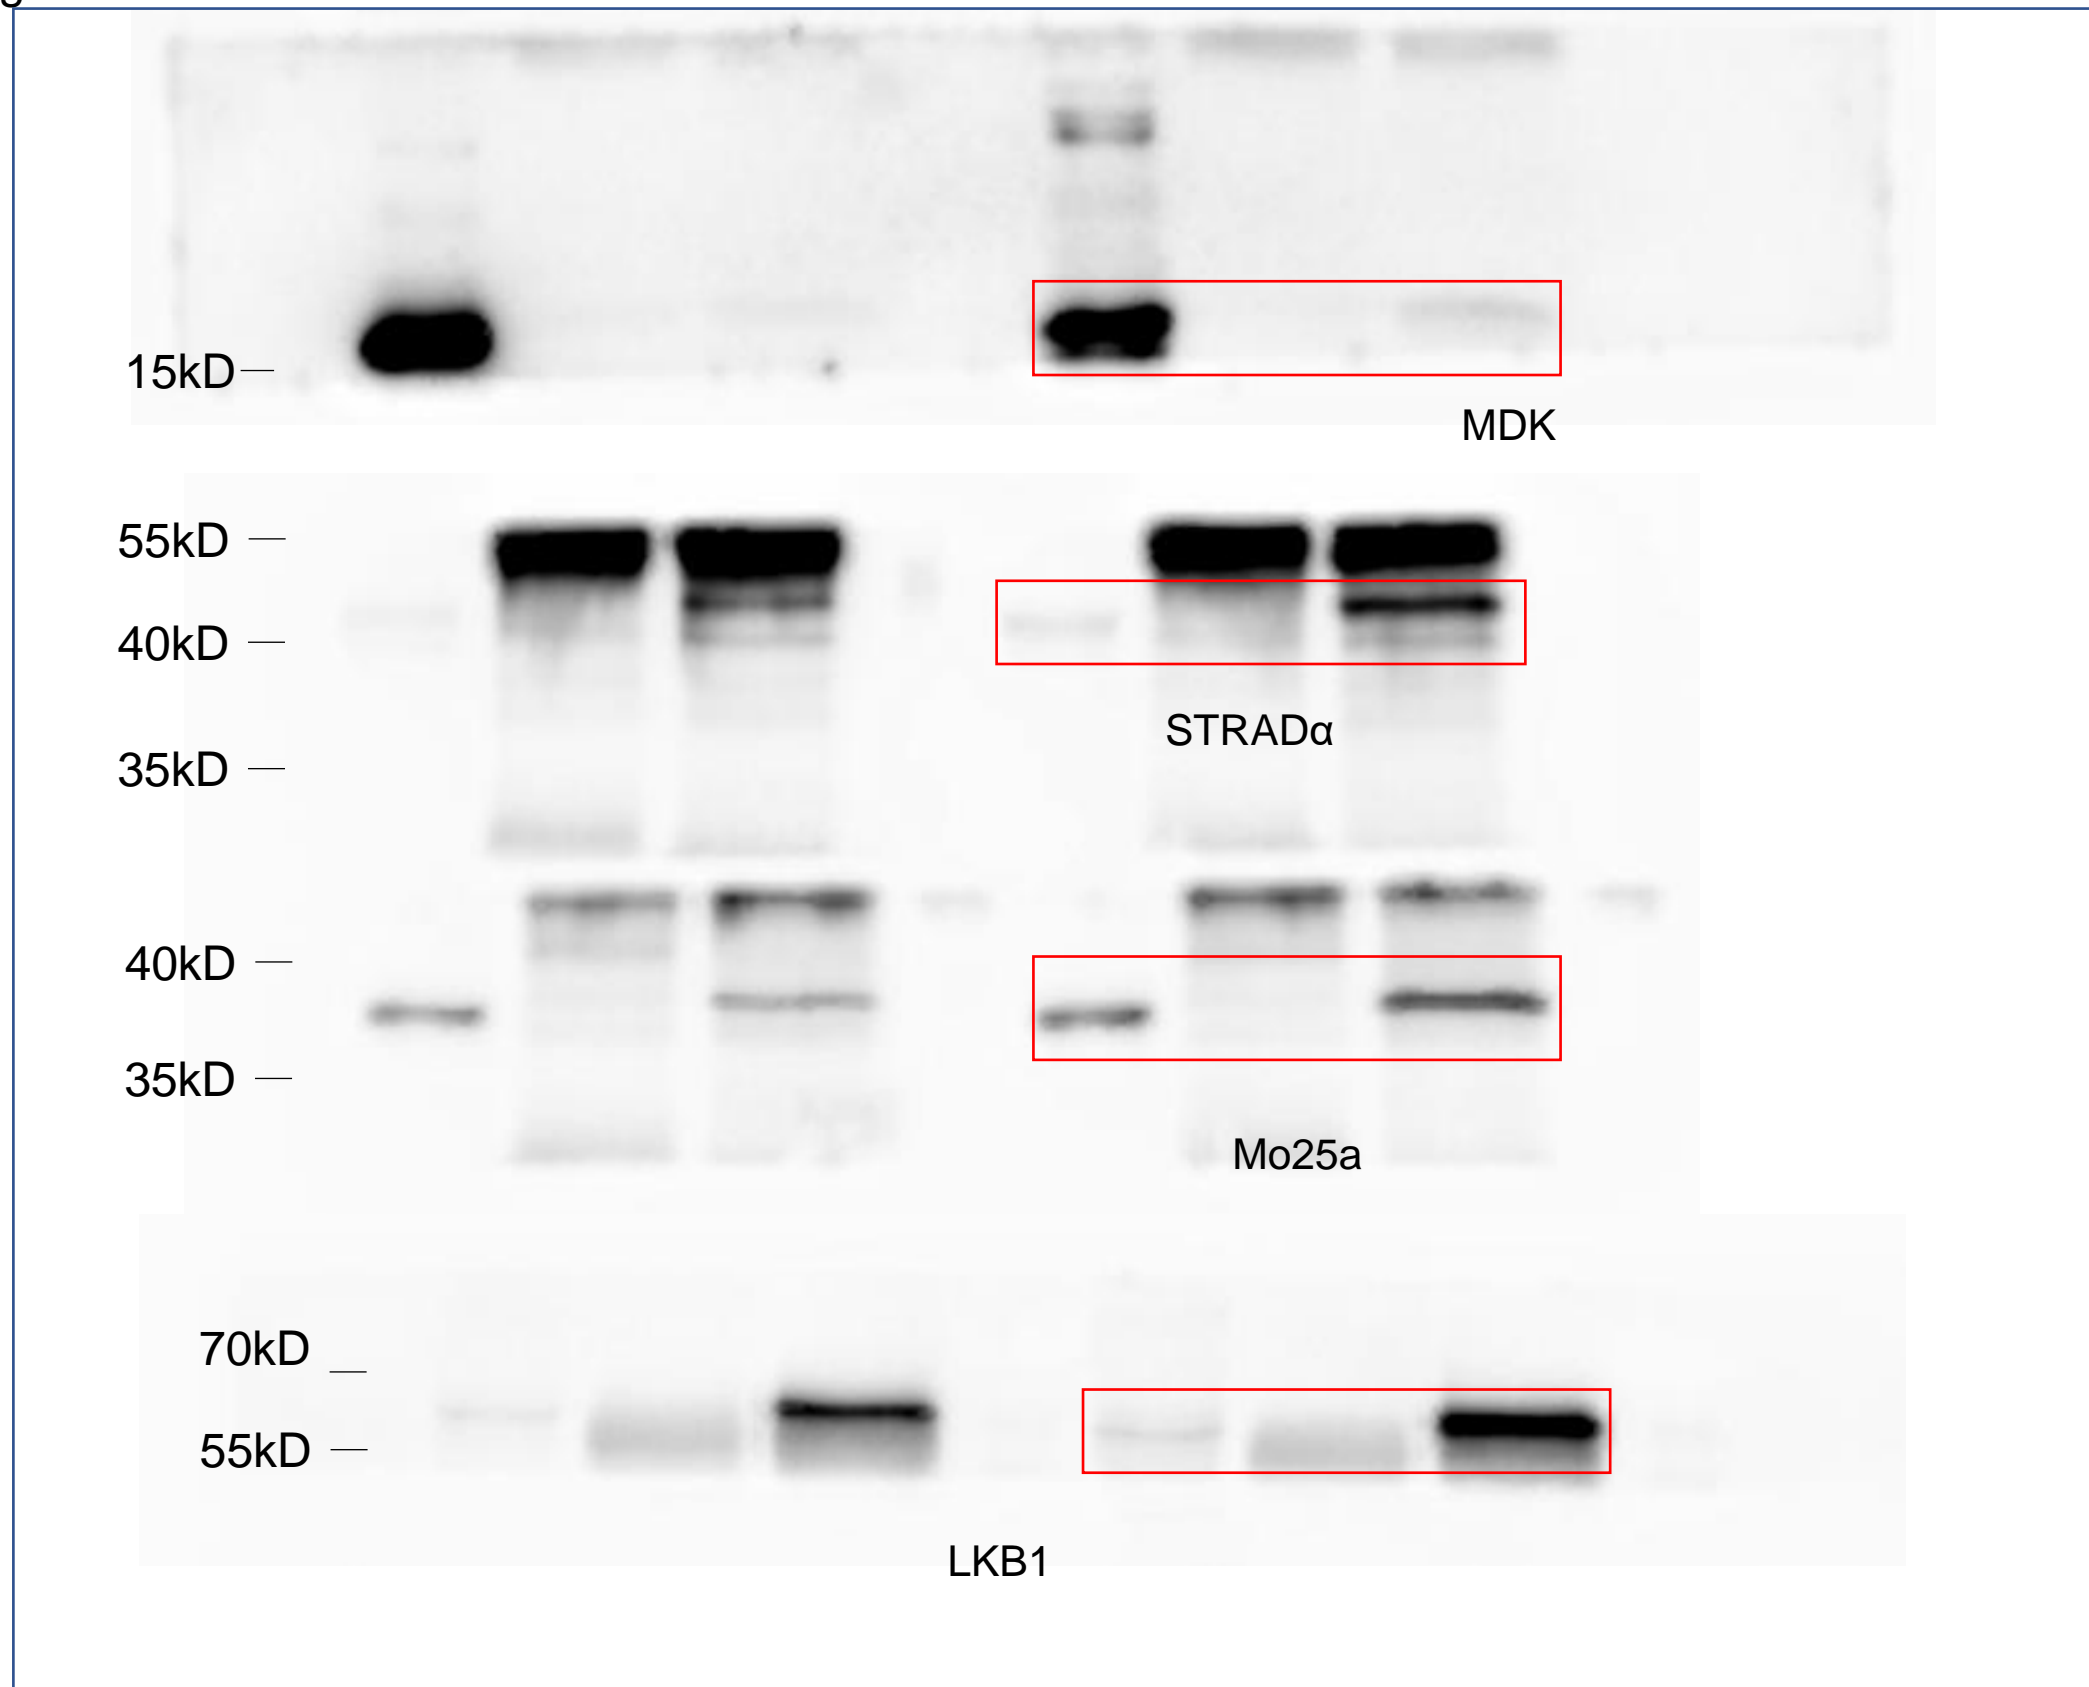

Fig.2G-H

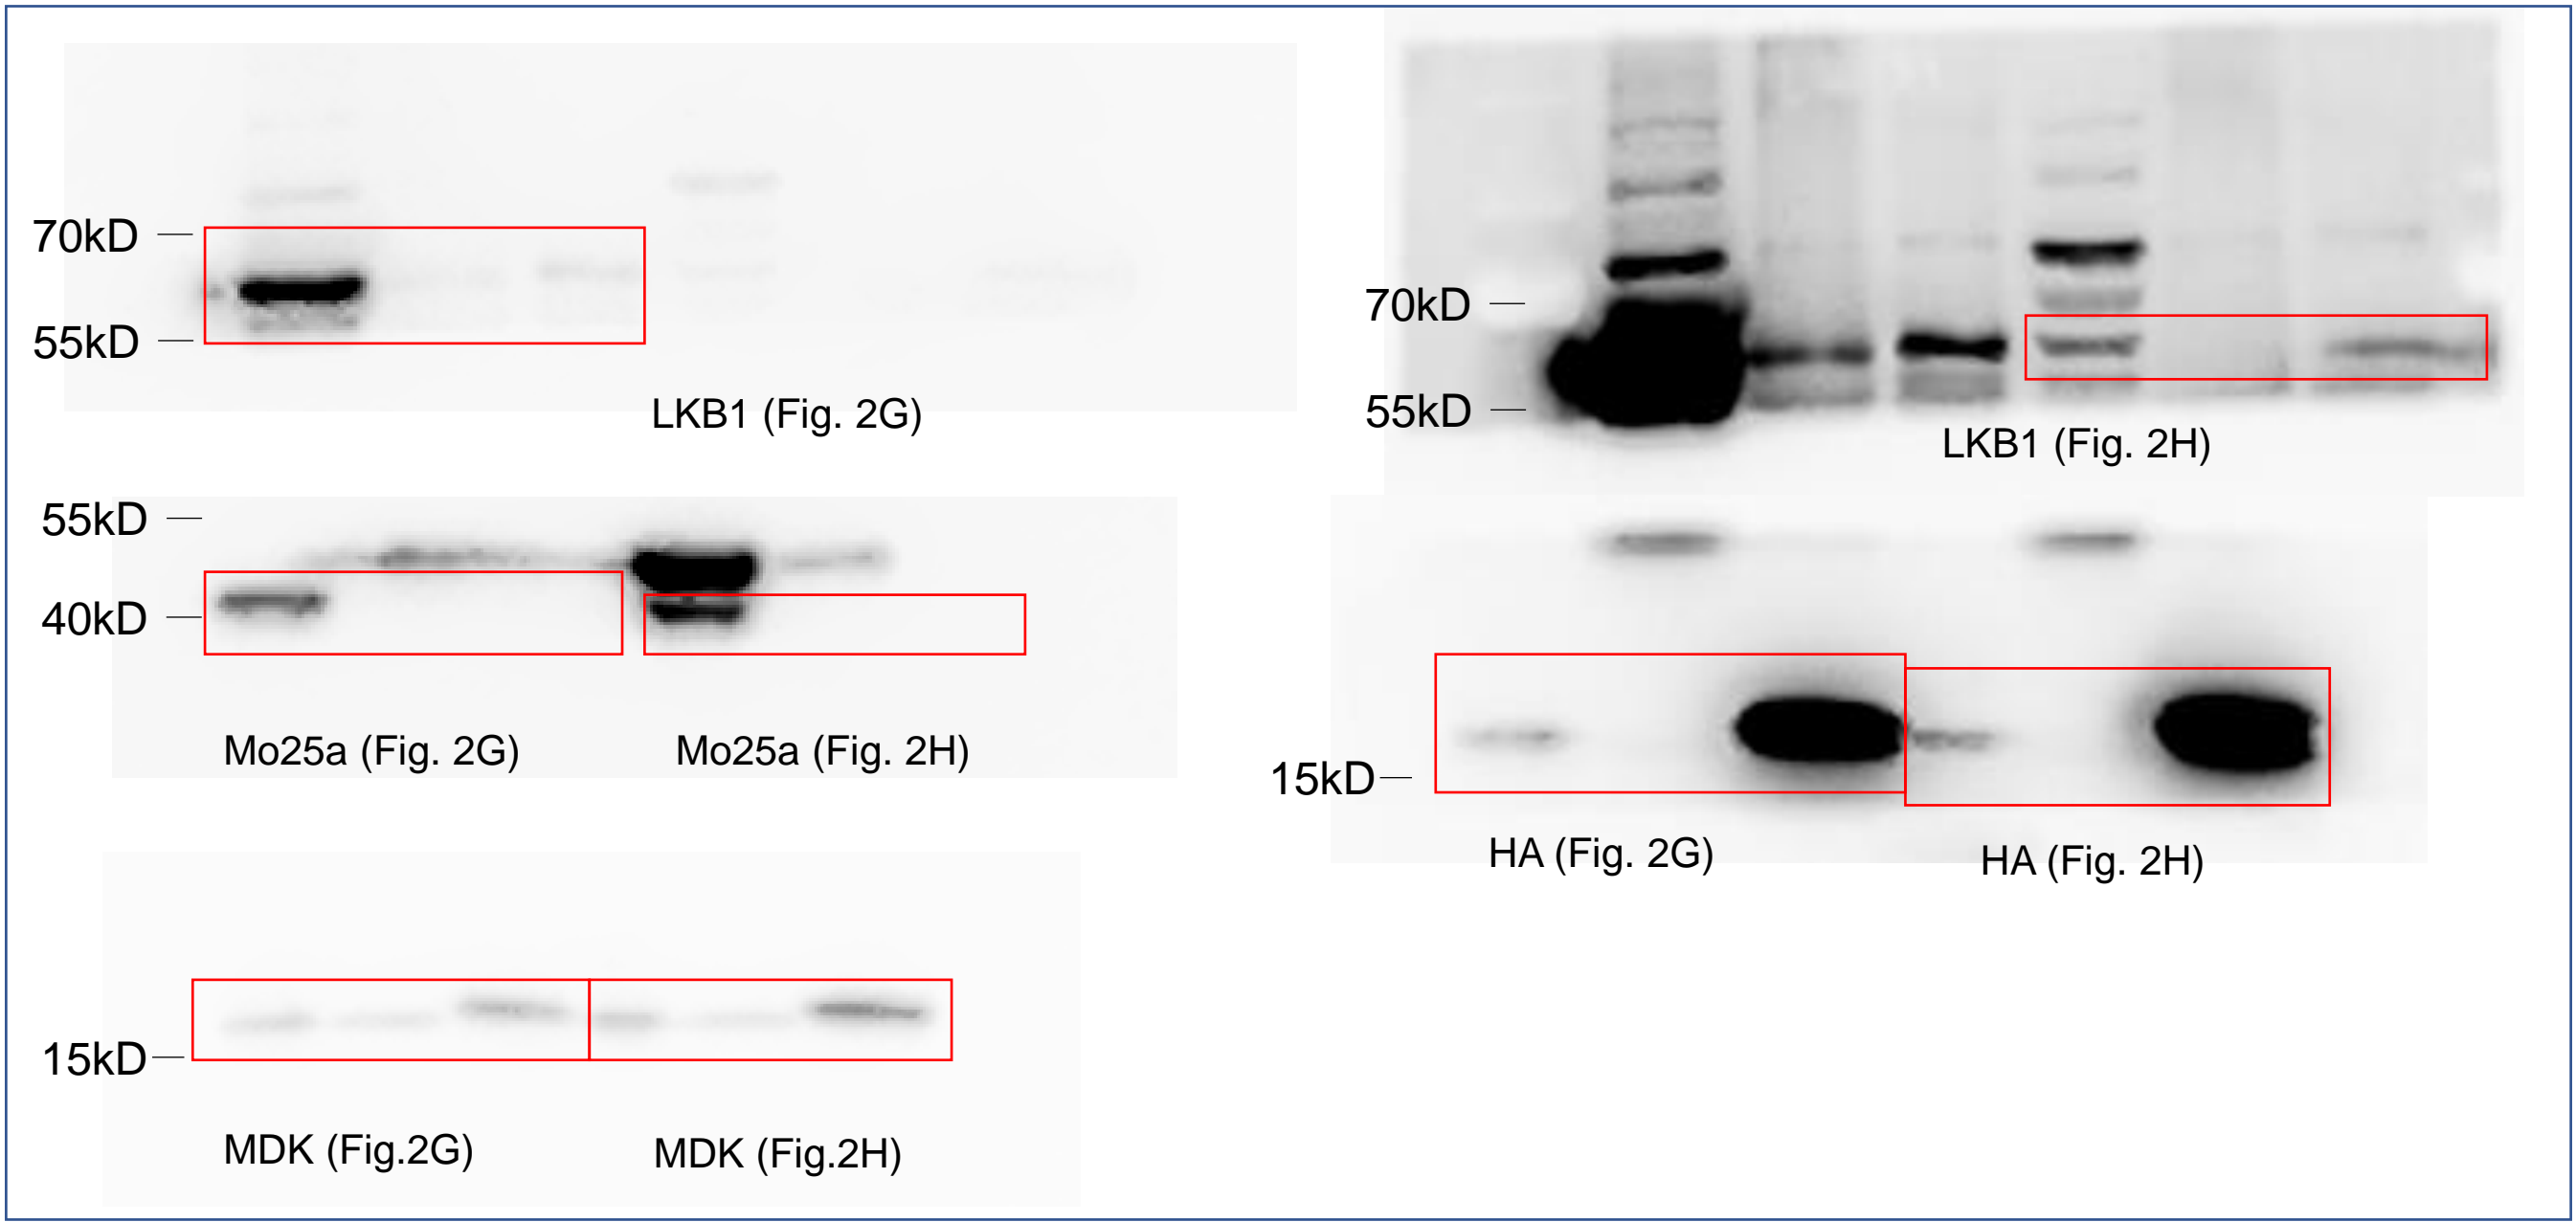

Fig.3A

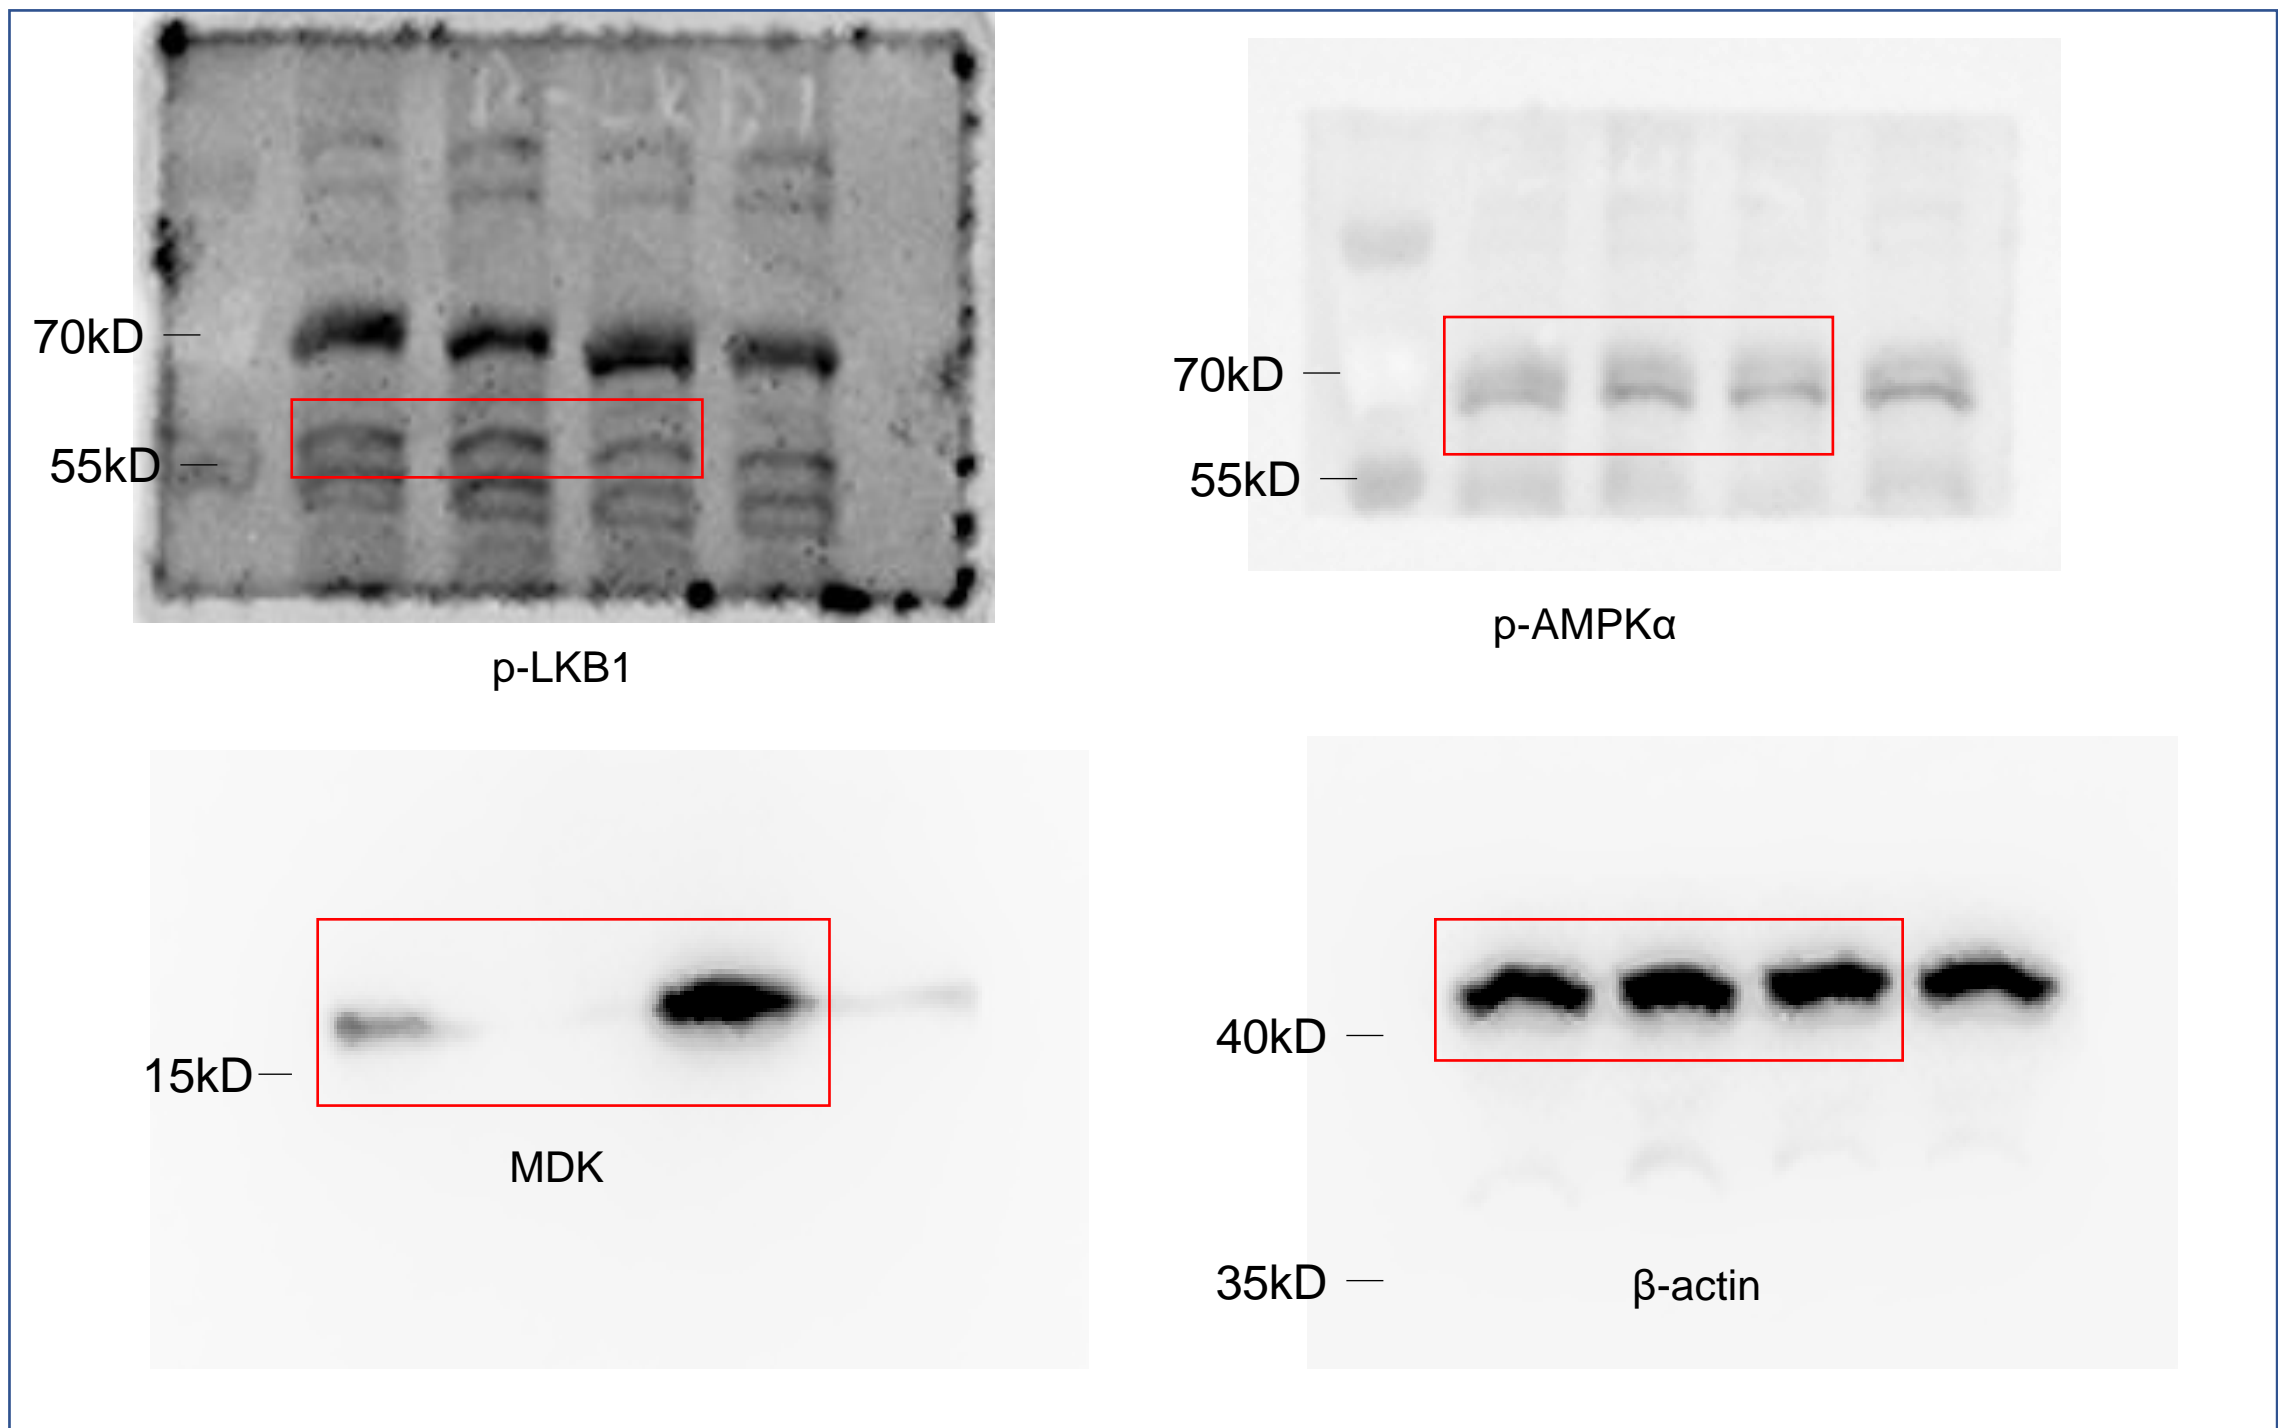

Fig.3B

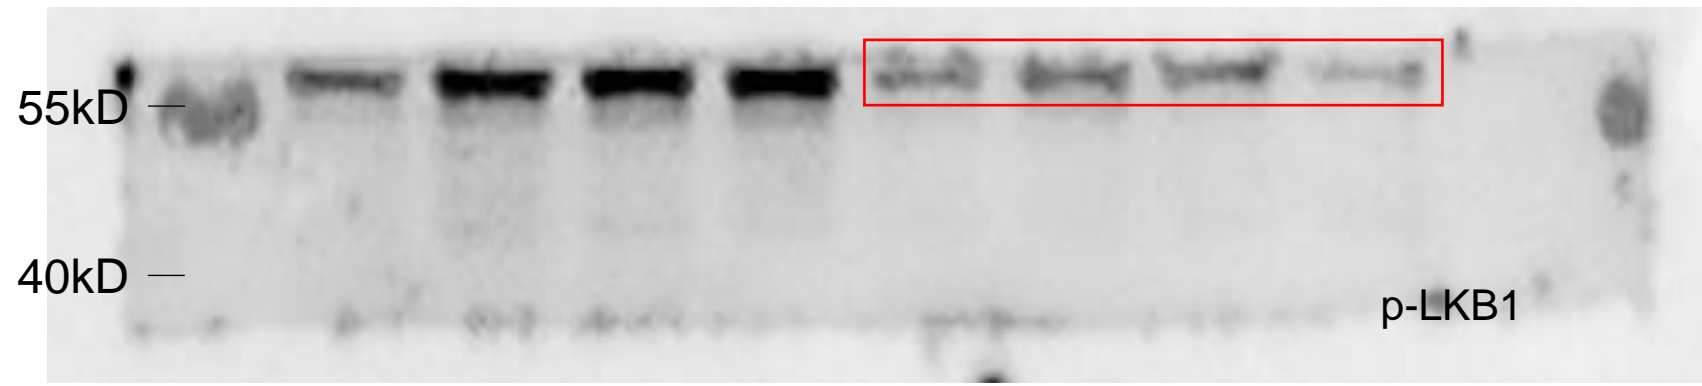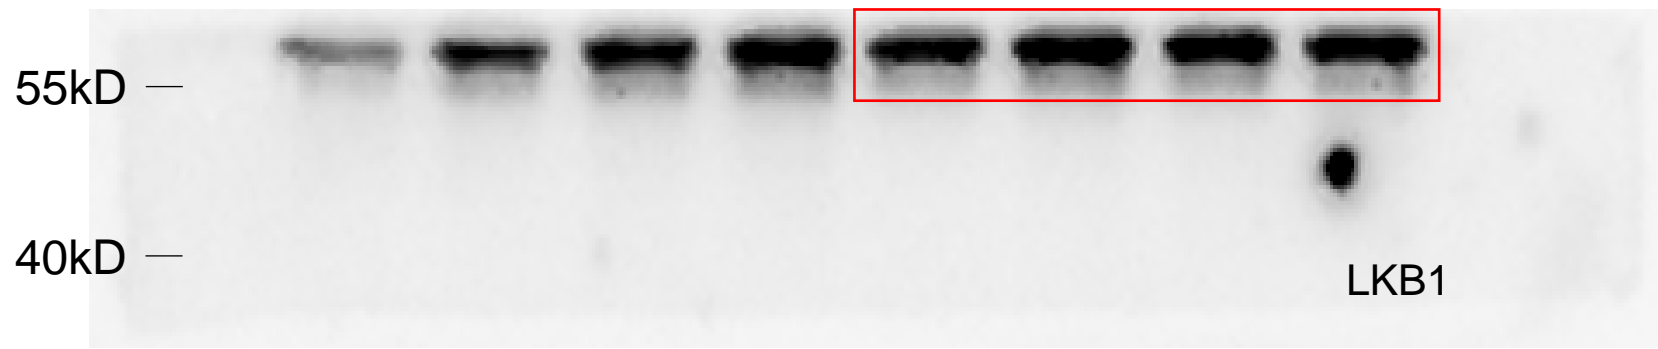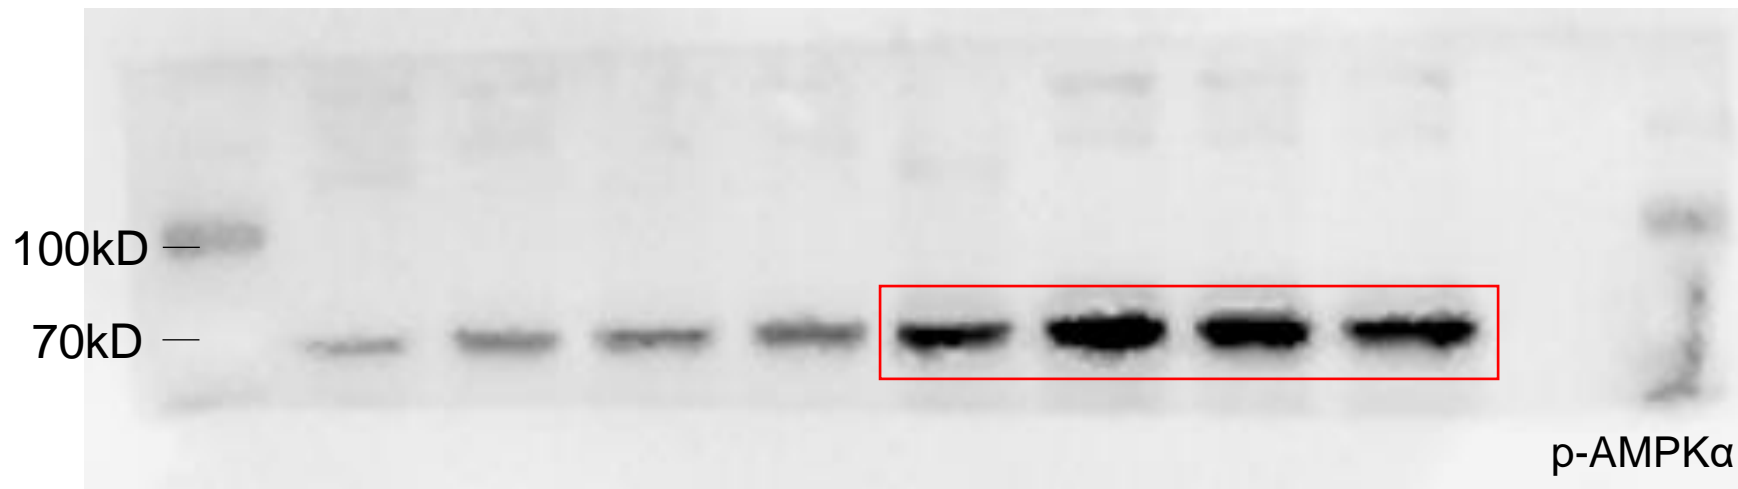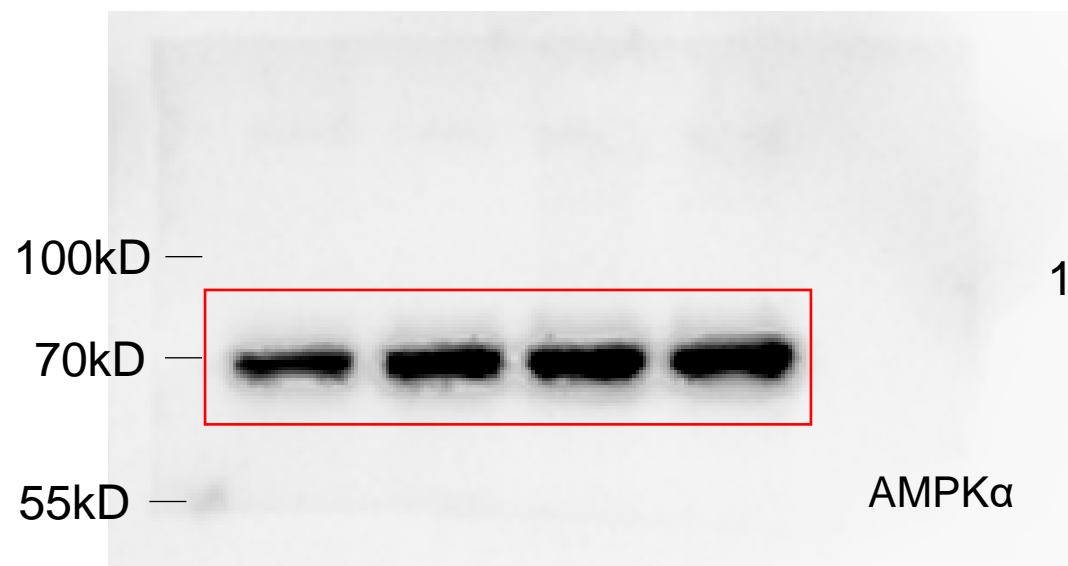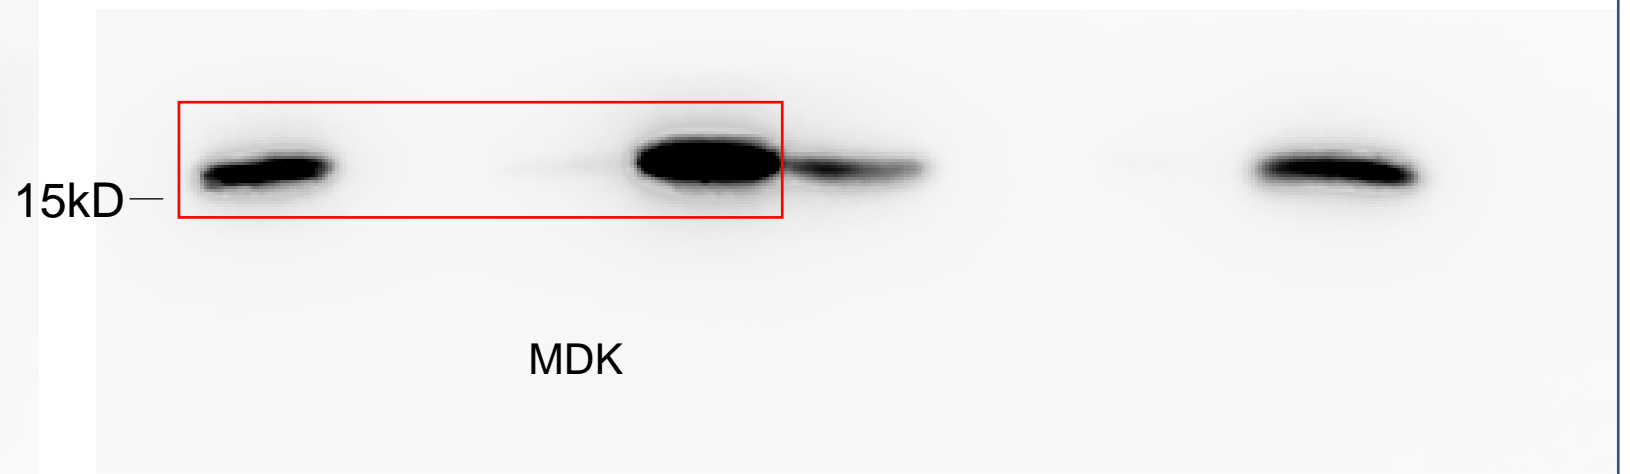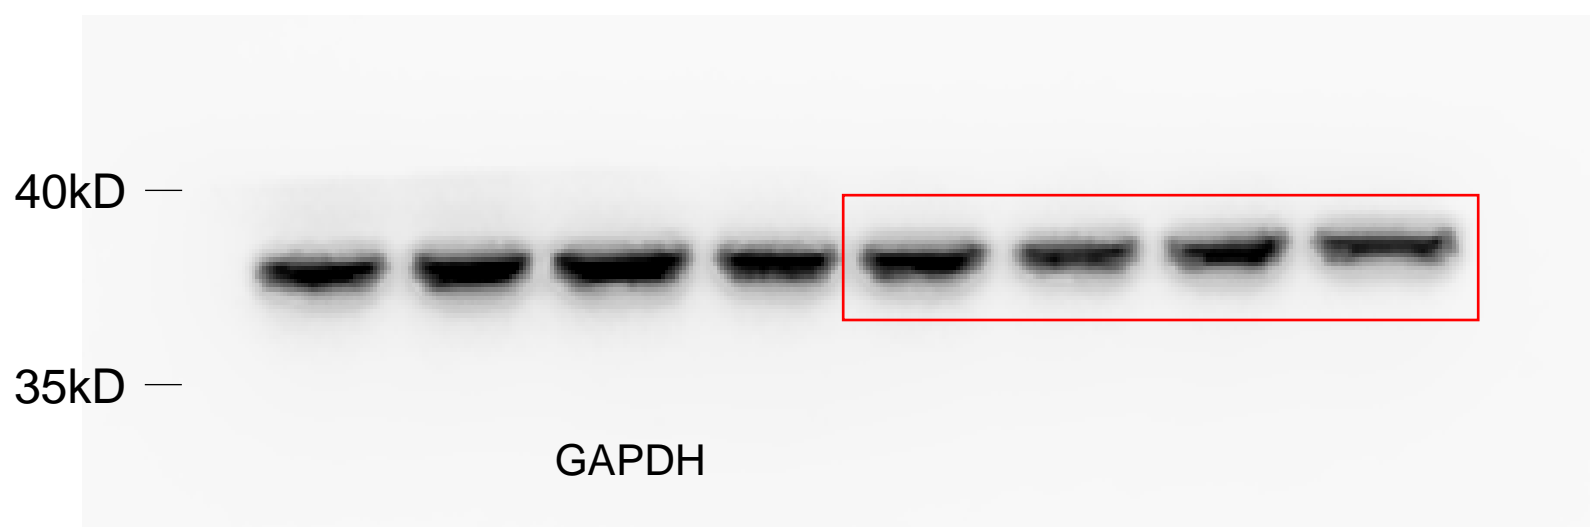

Fig.3C

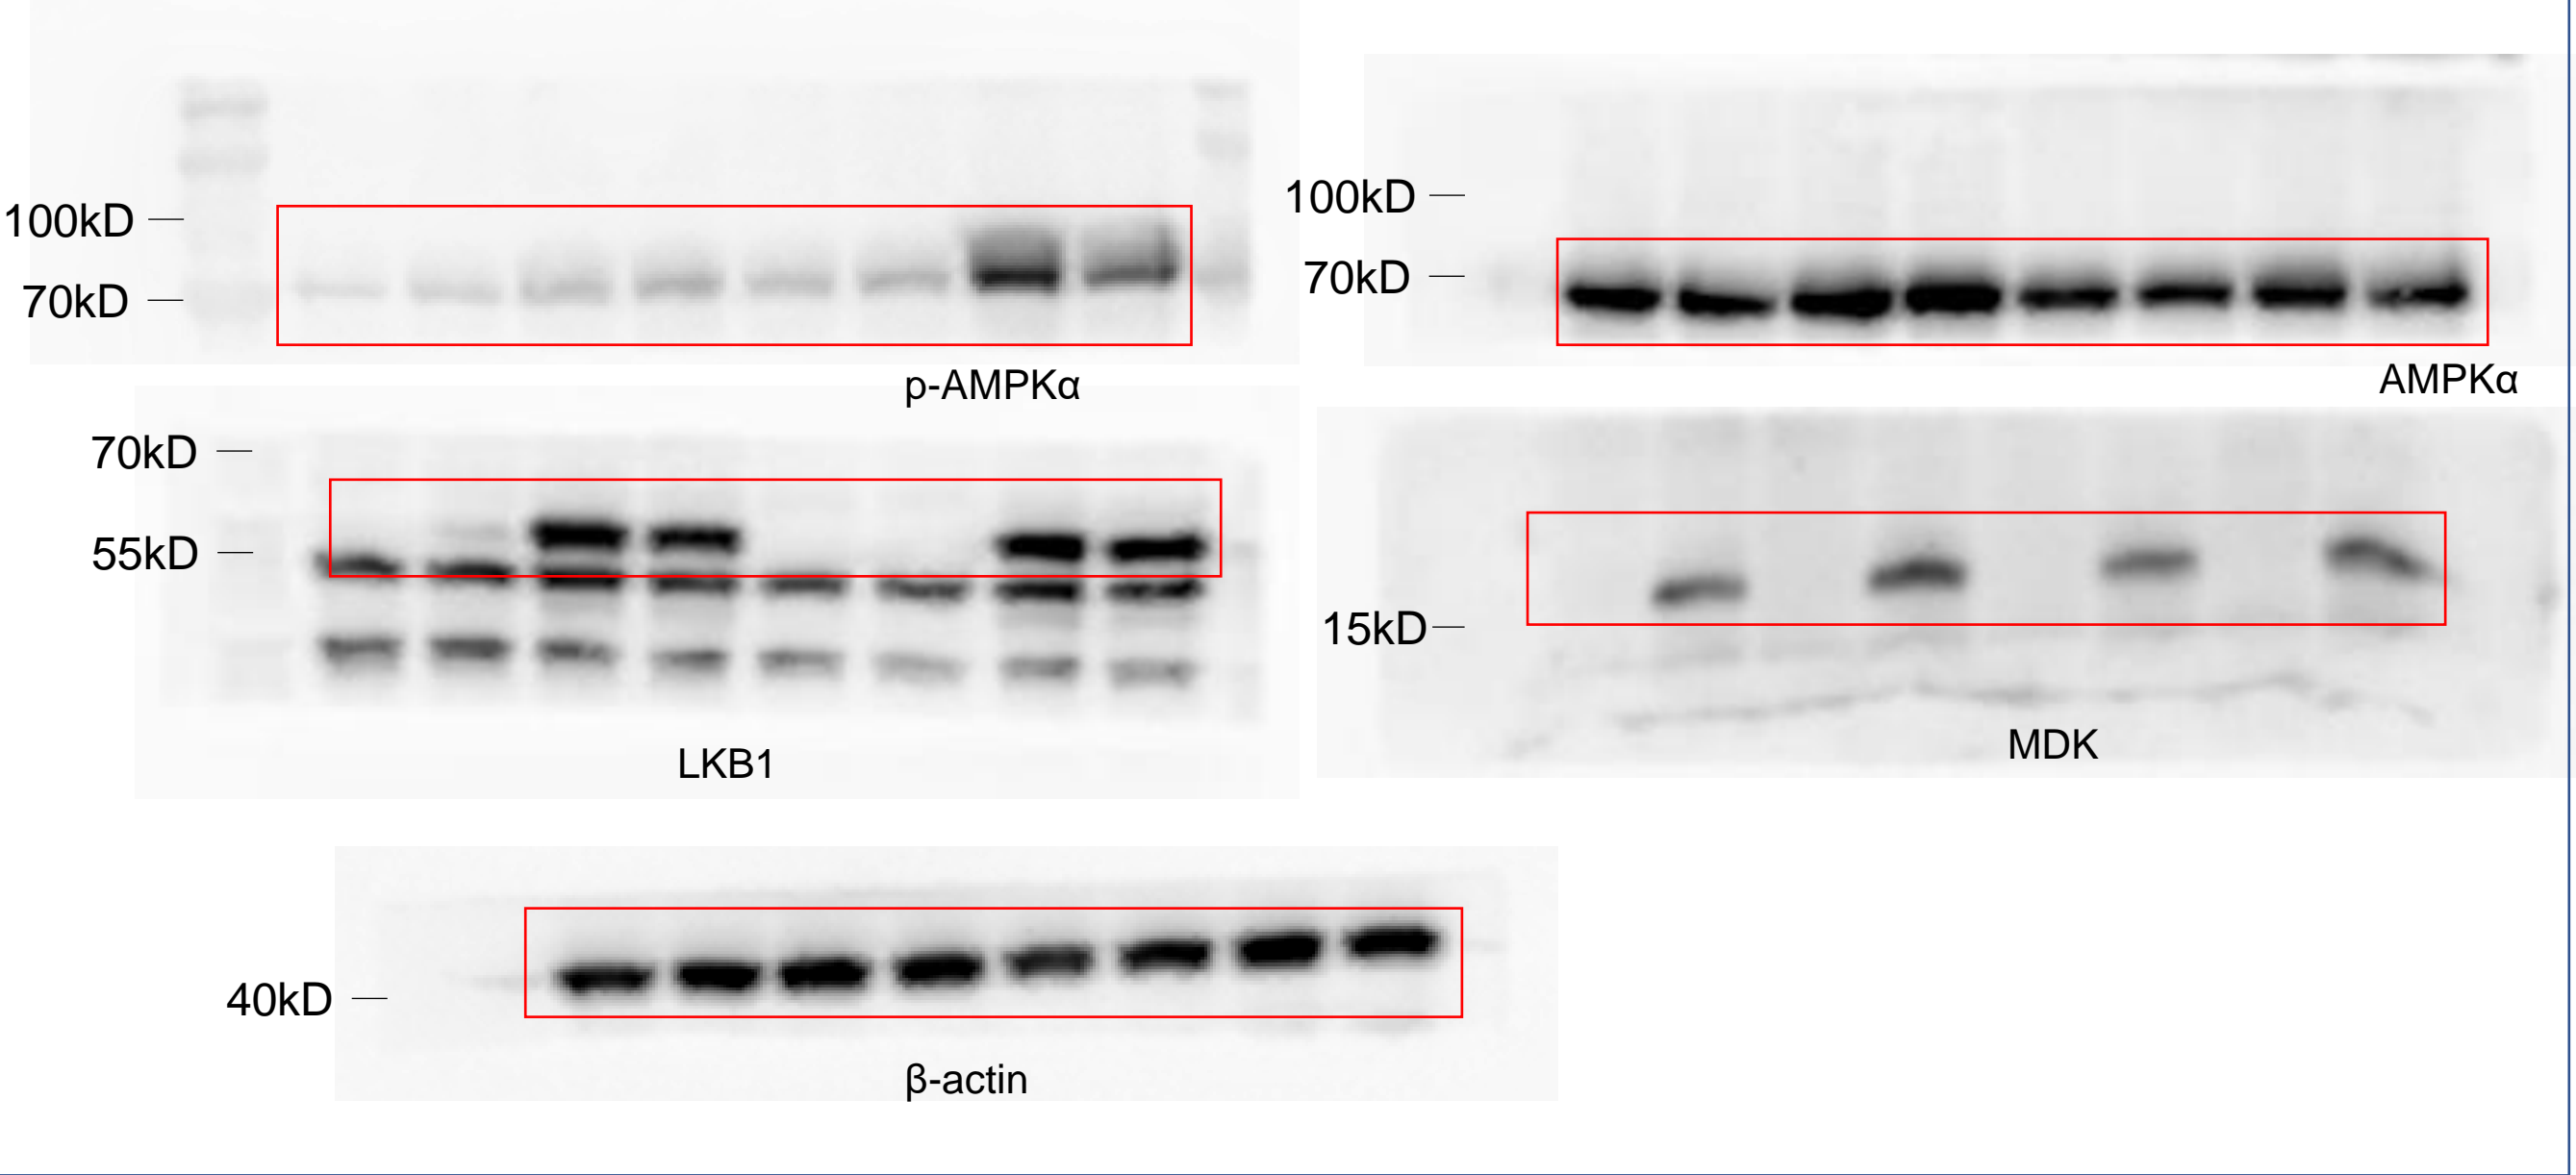

Fig.3D

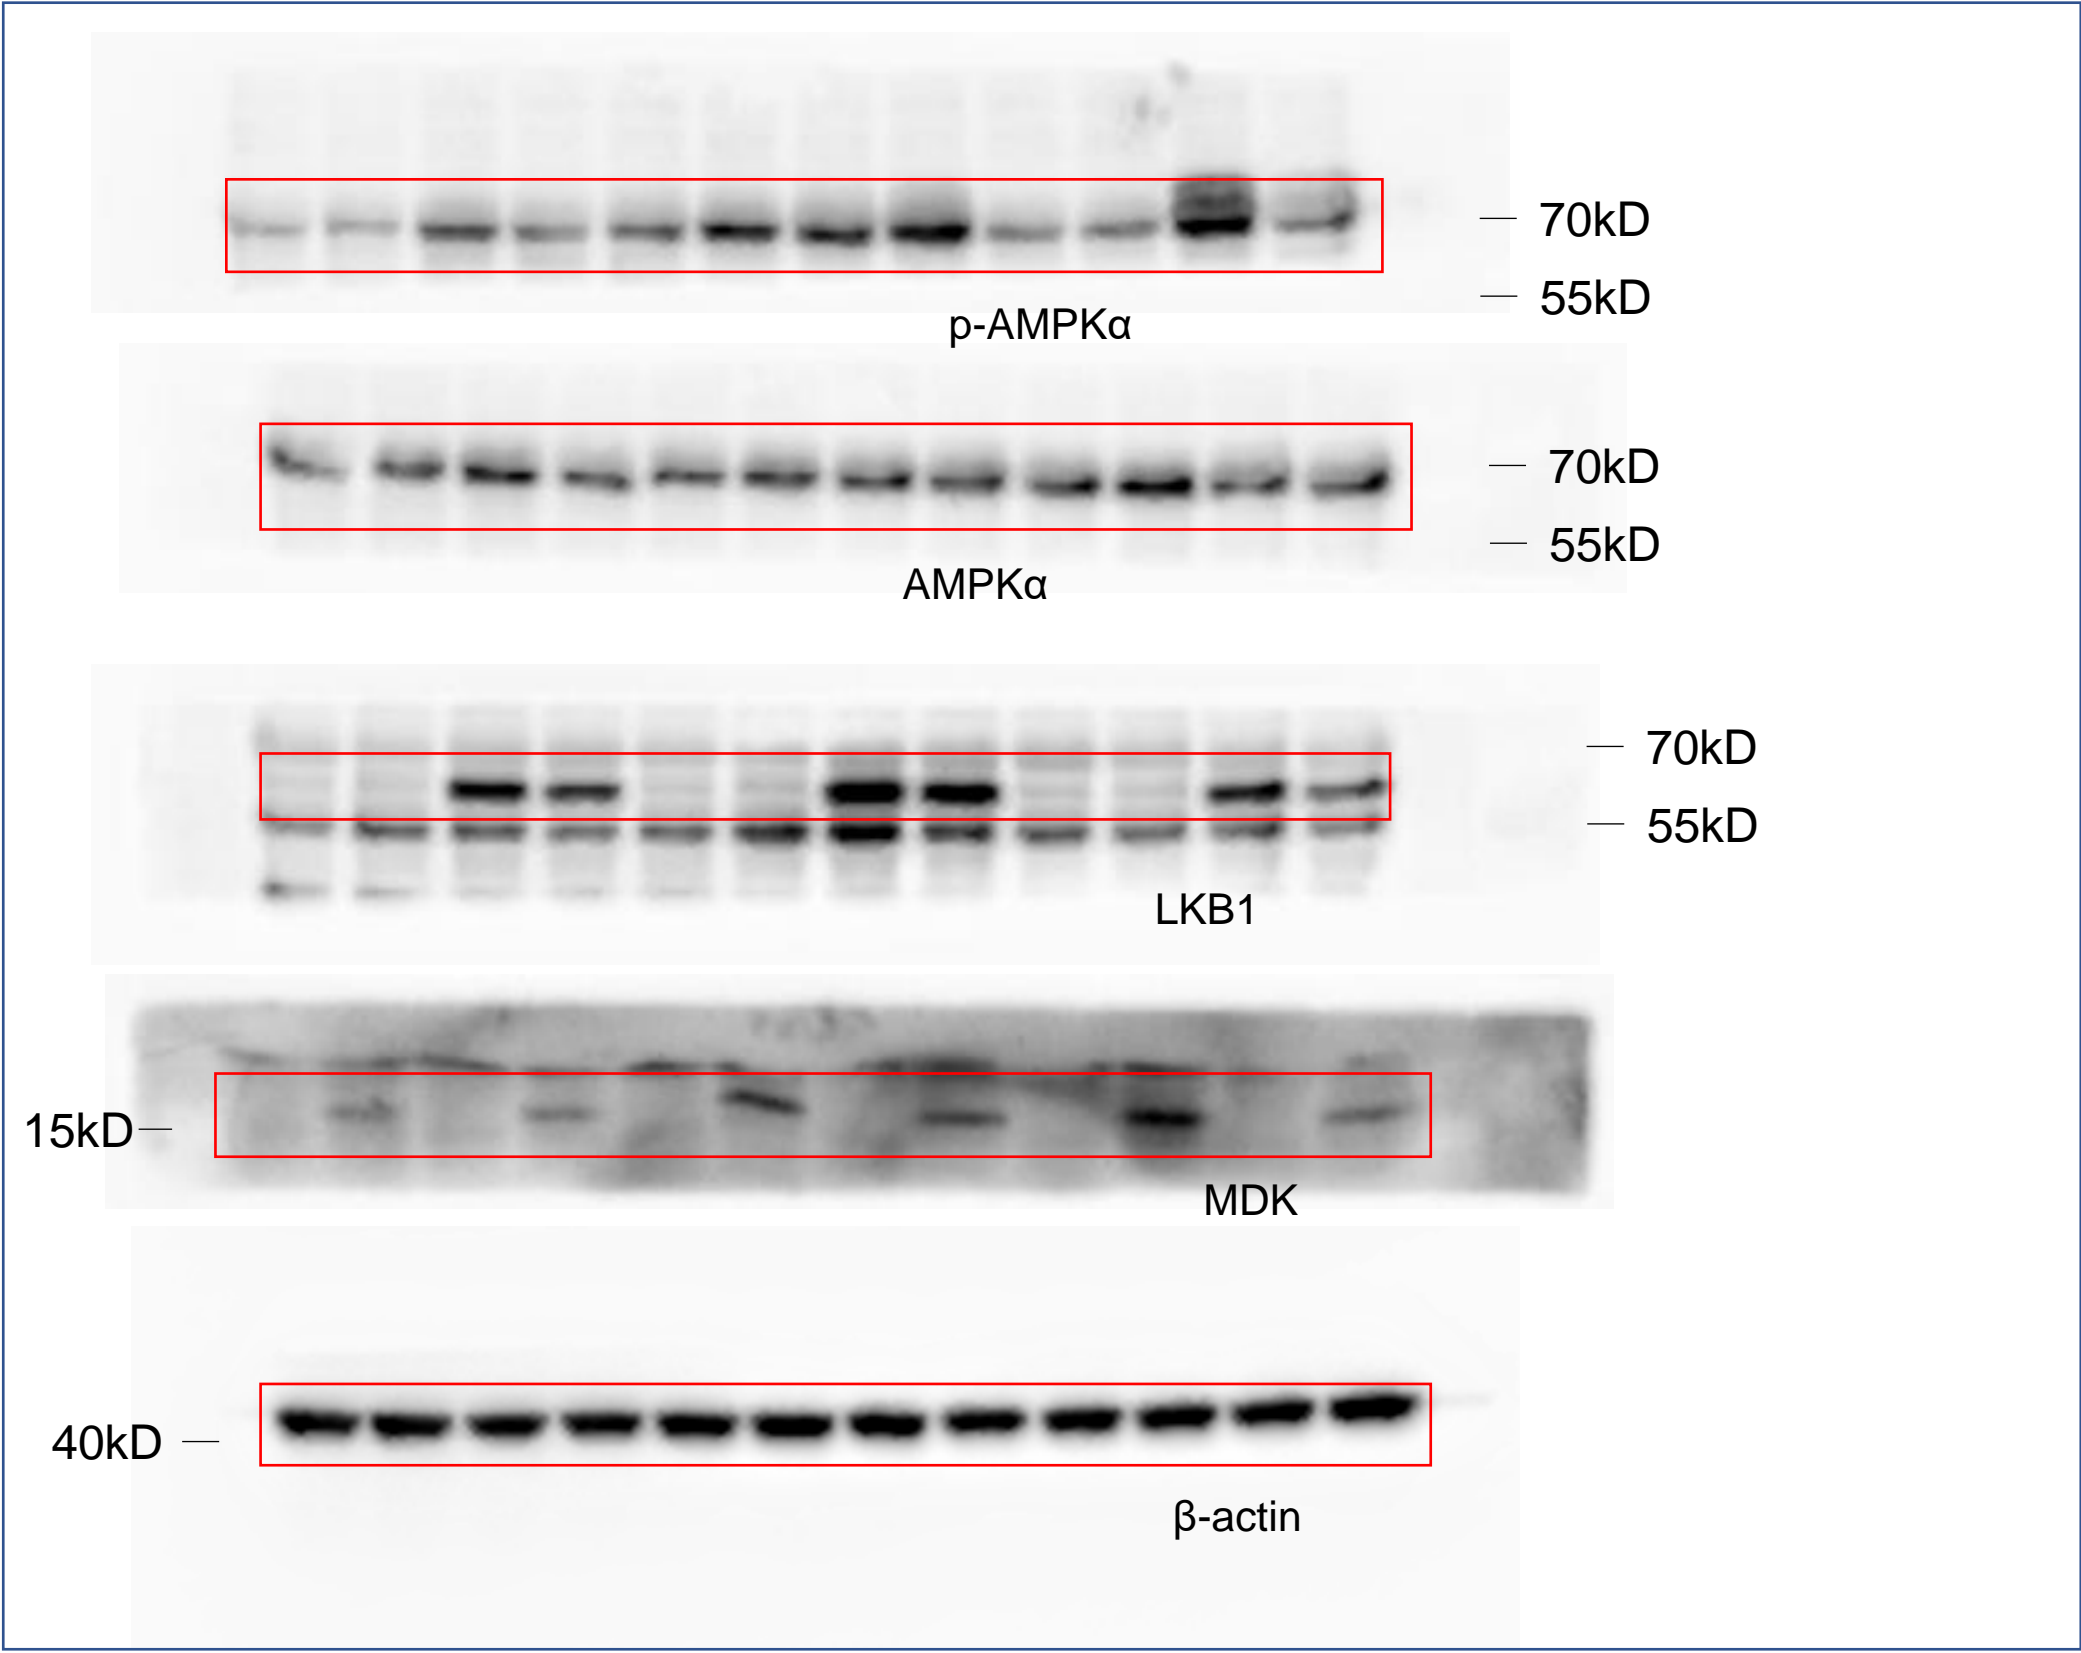

Fig.3E

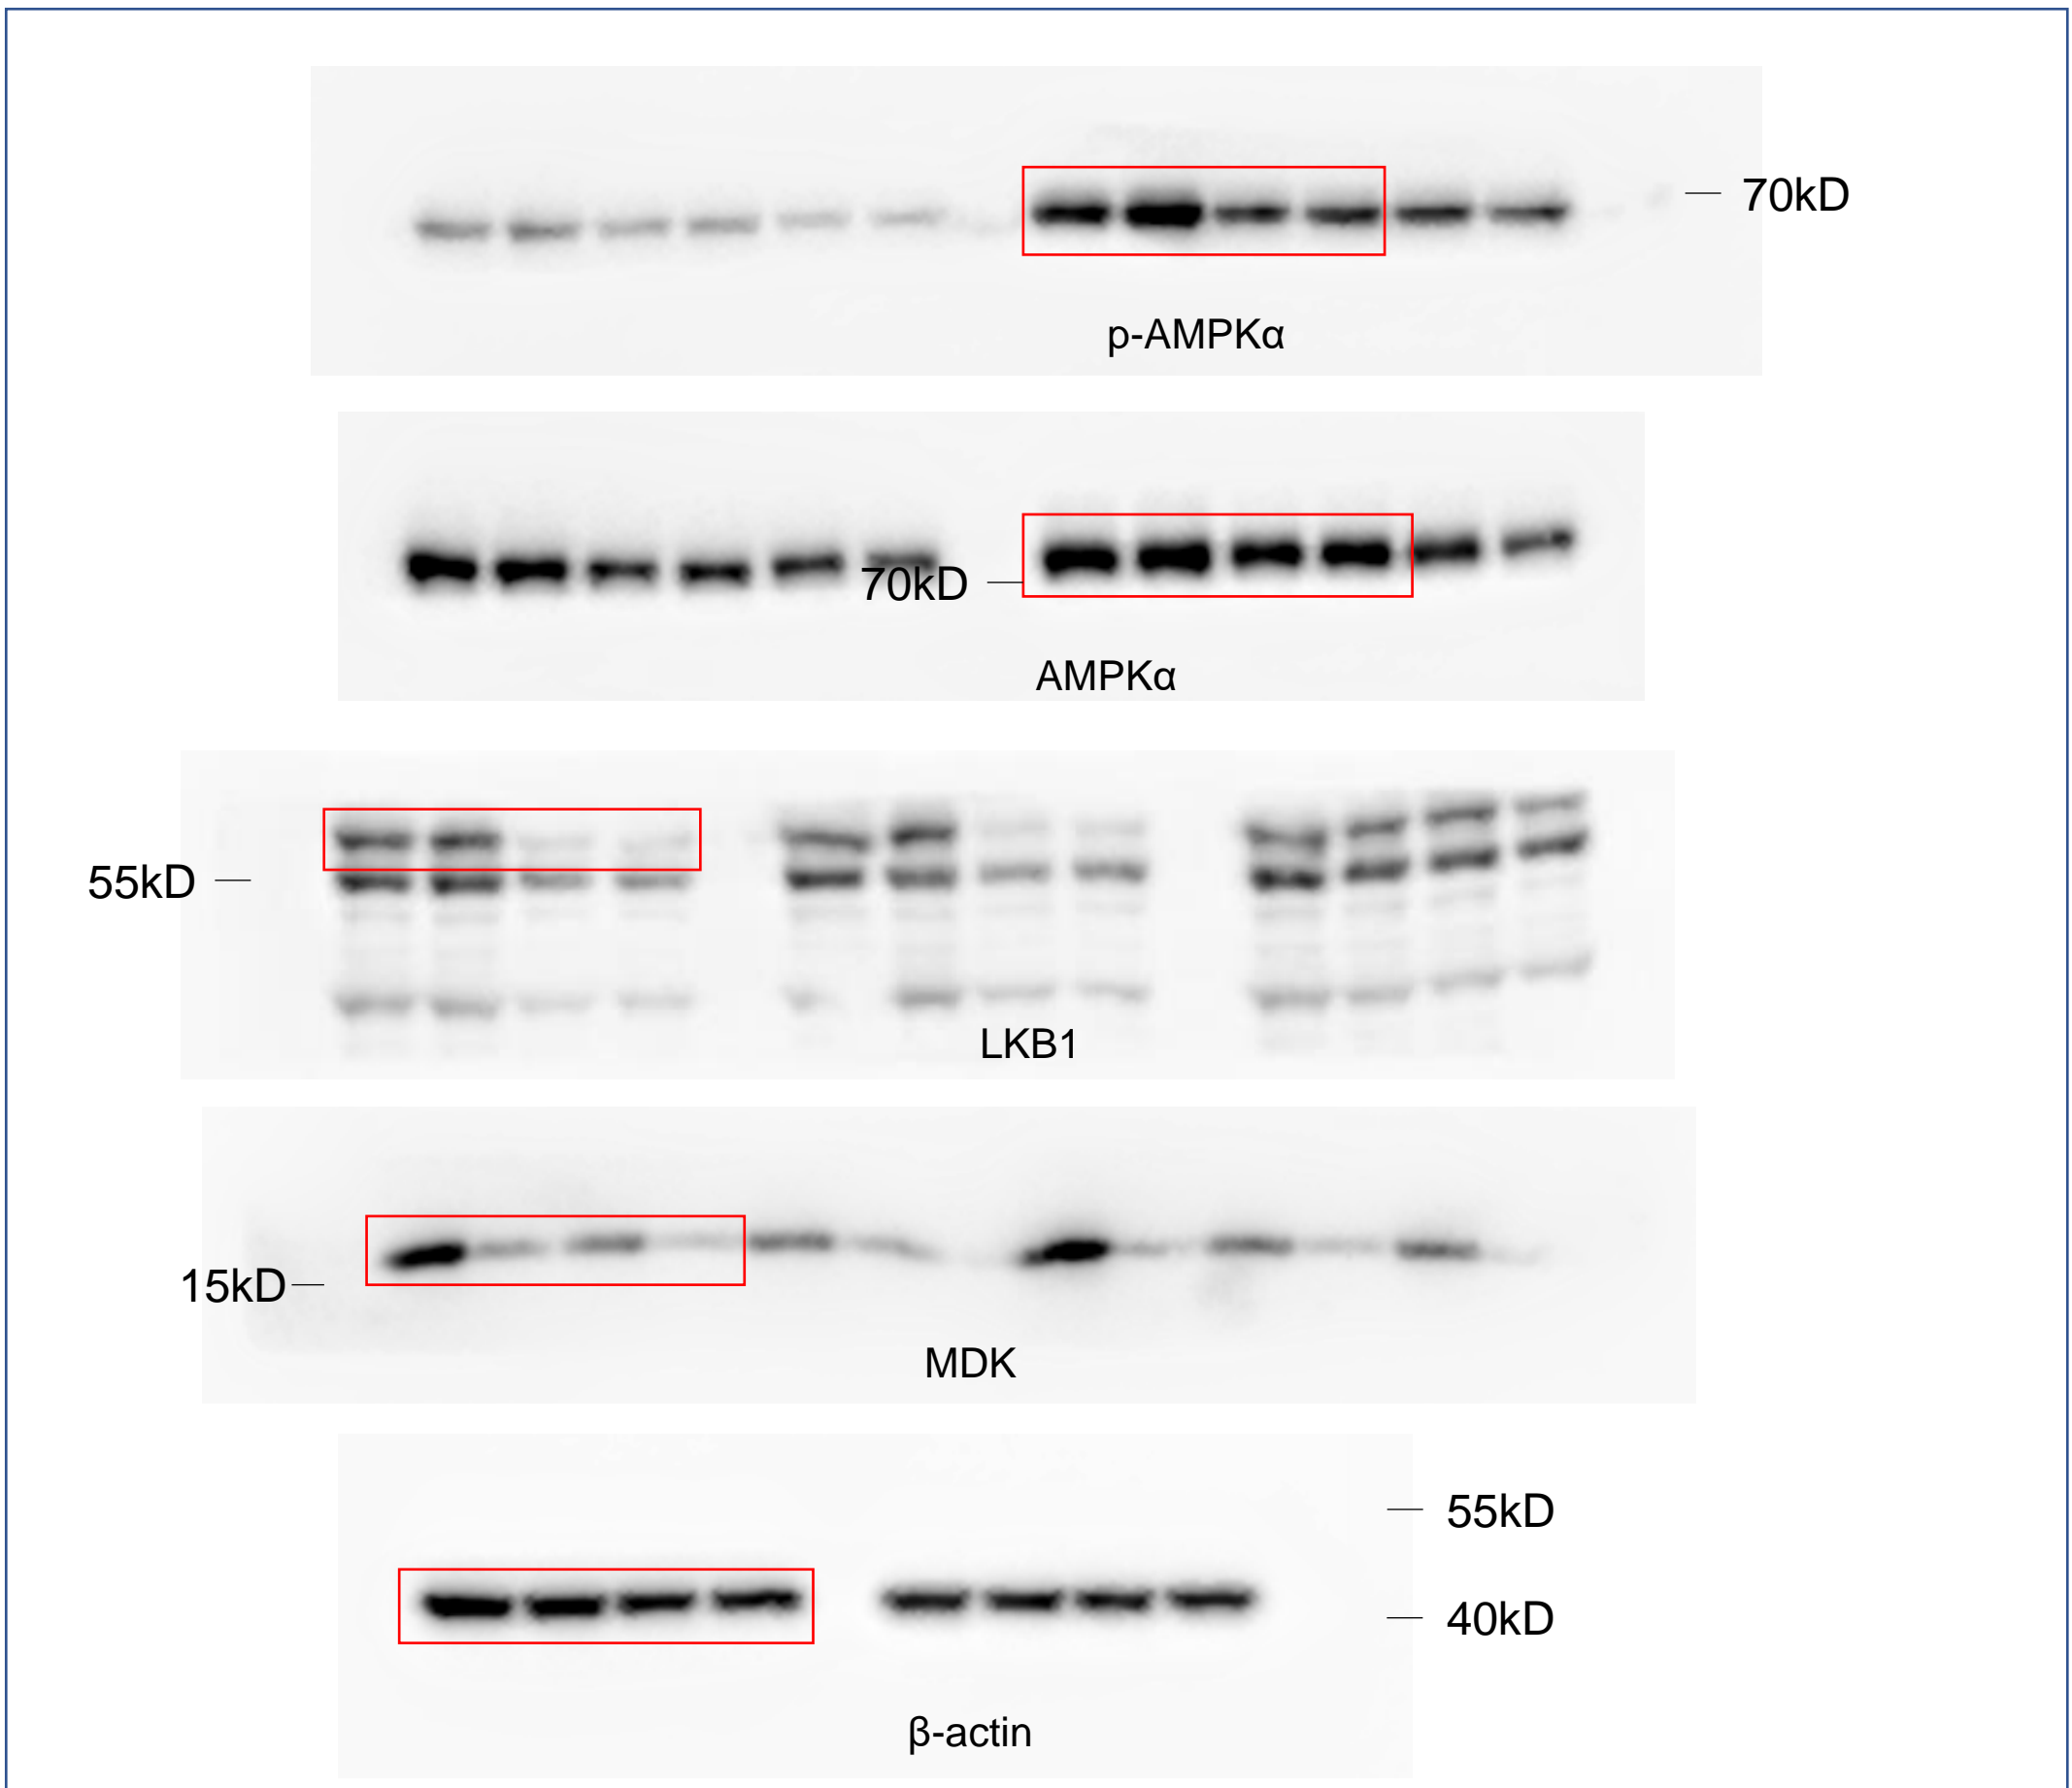

Fig.3F

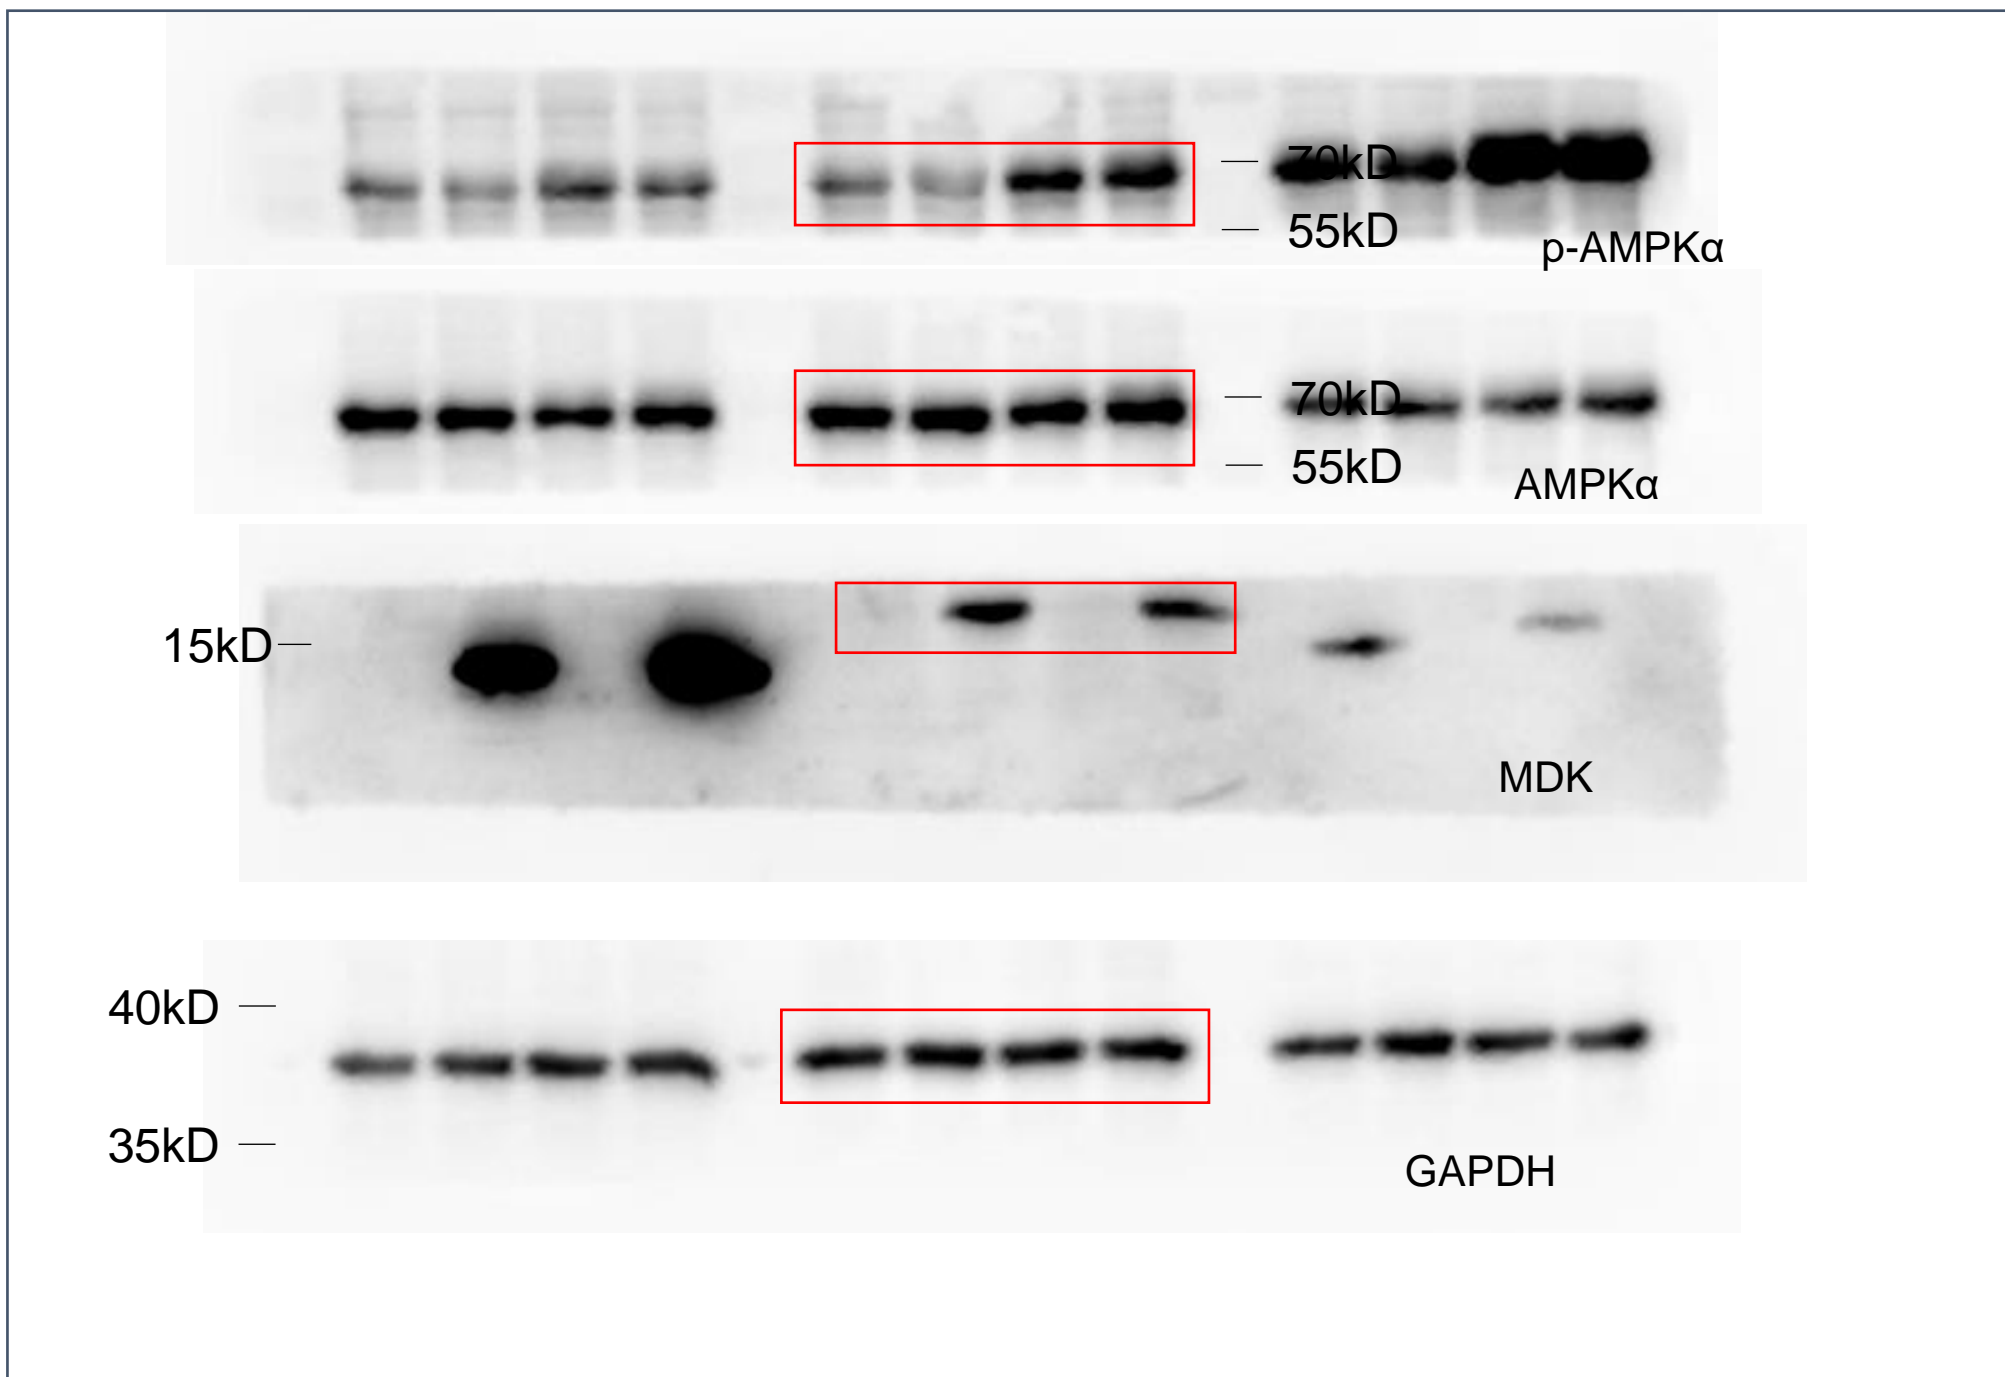

Fig.4A

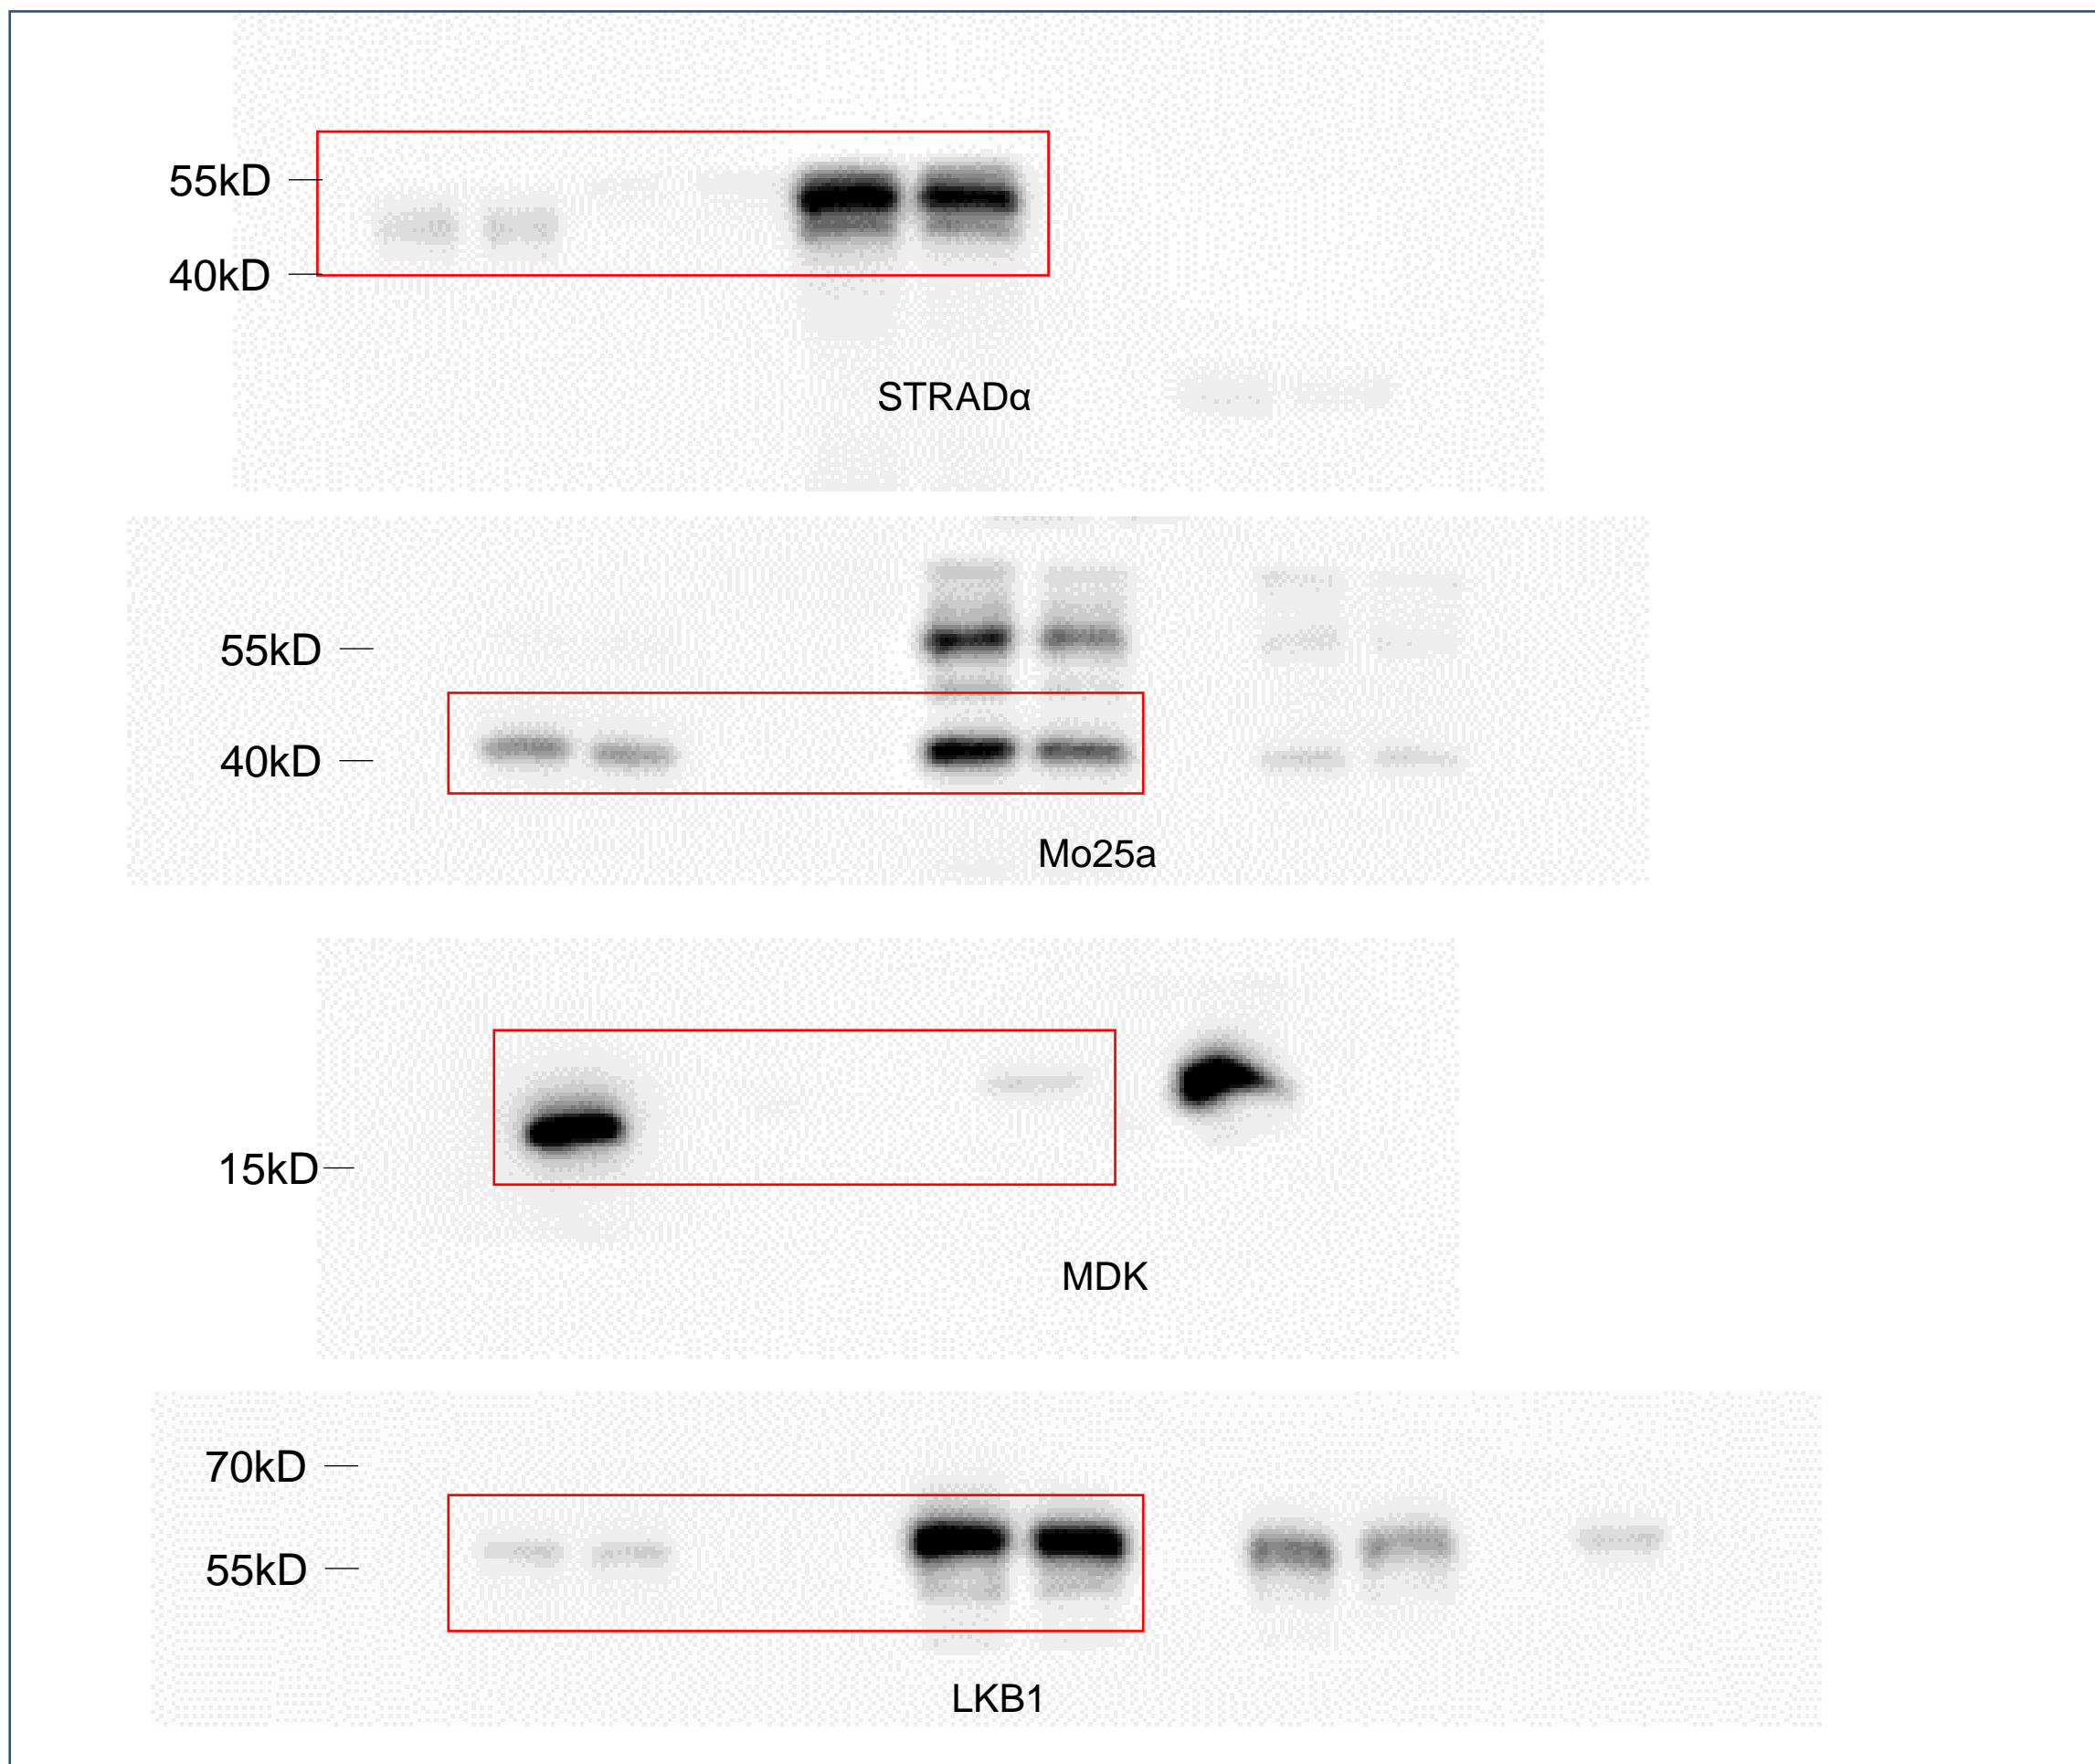

Fig.4B

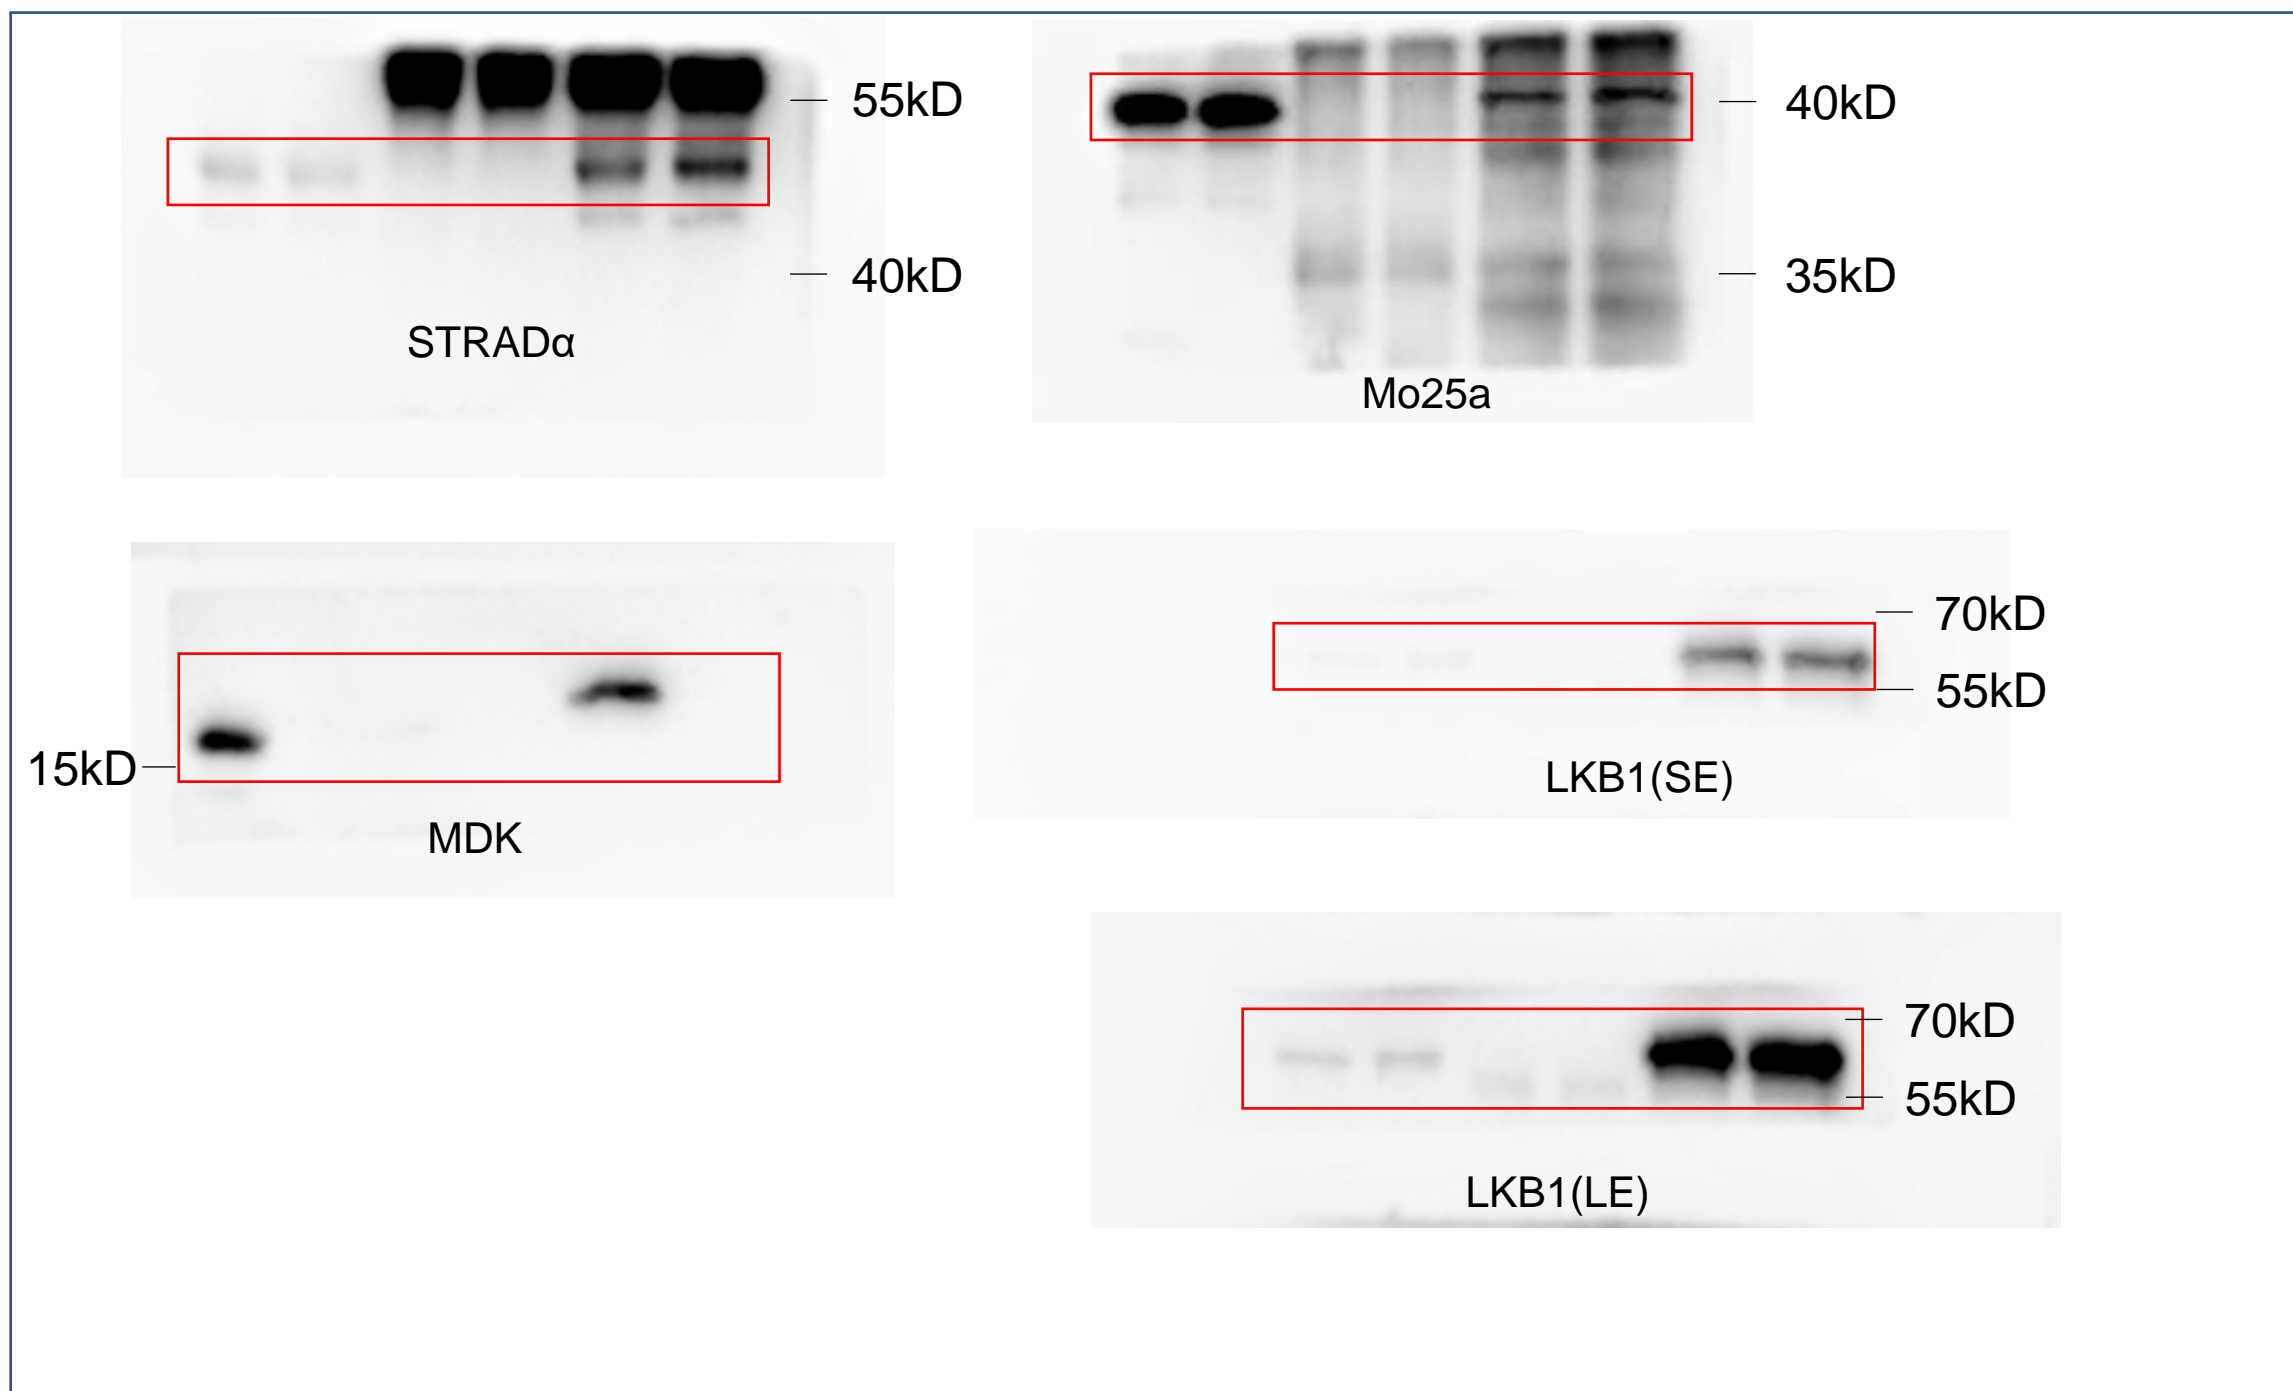



Fig.4C

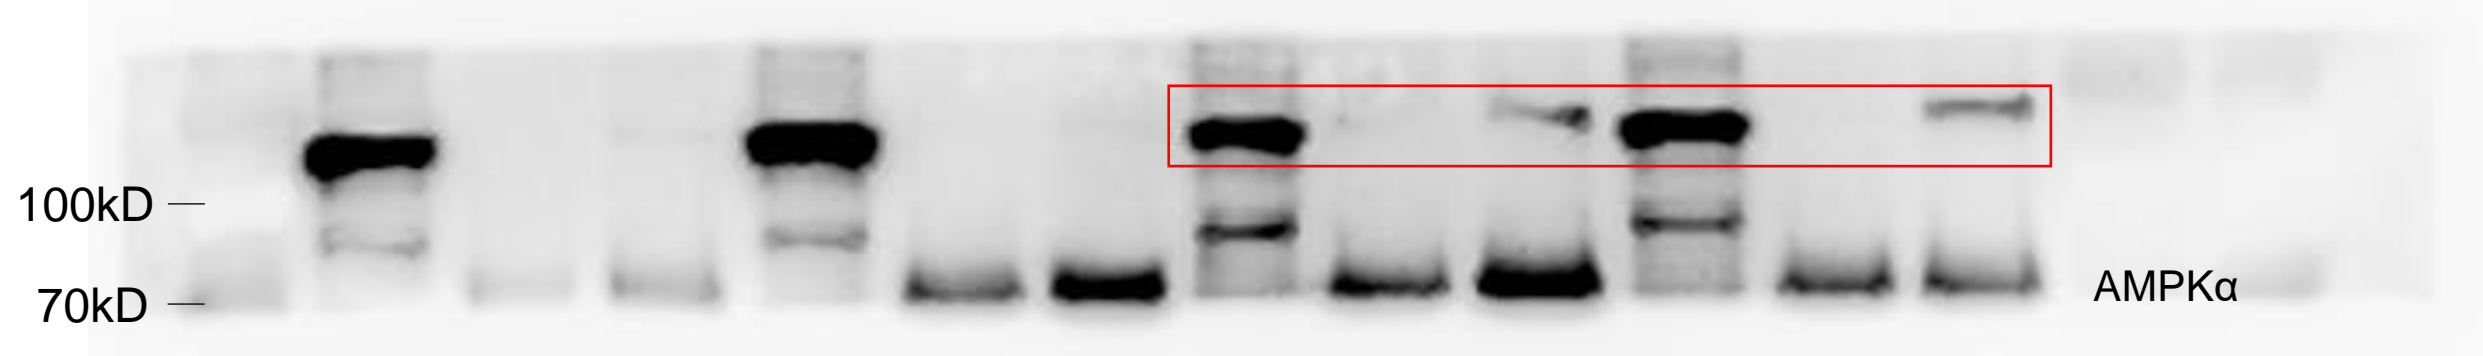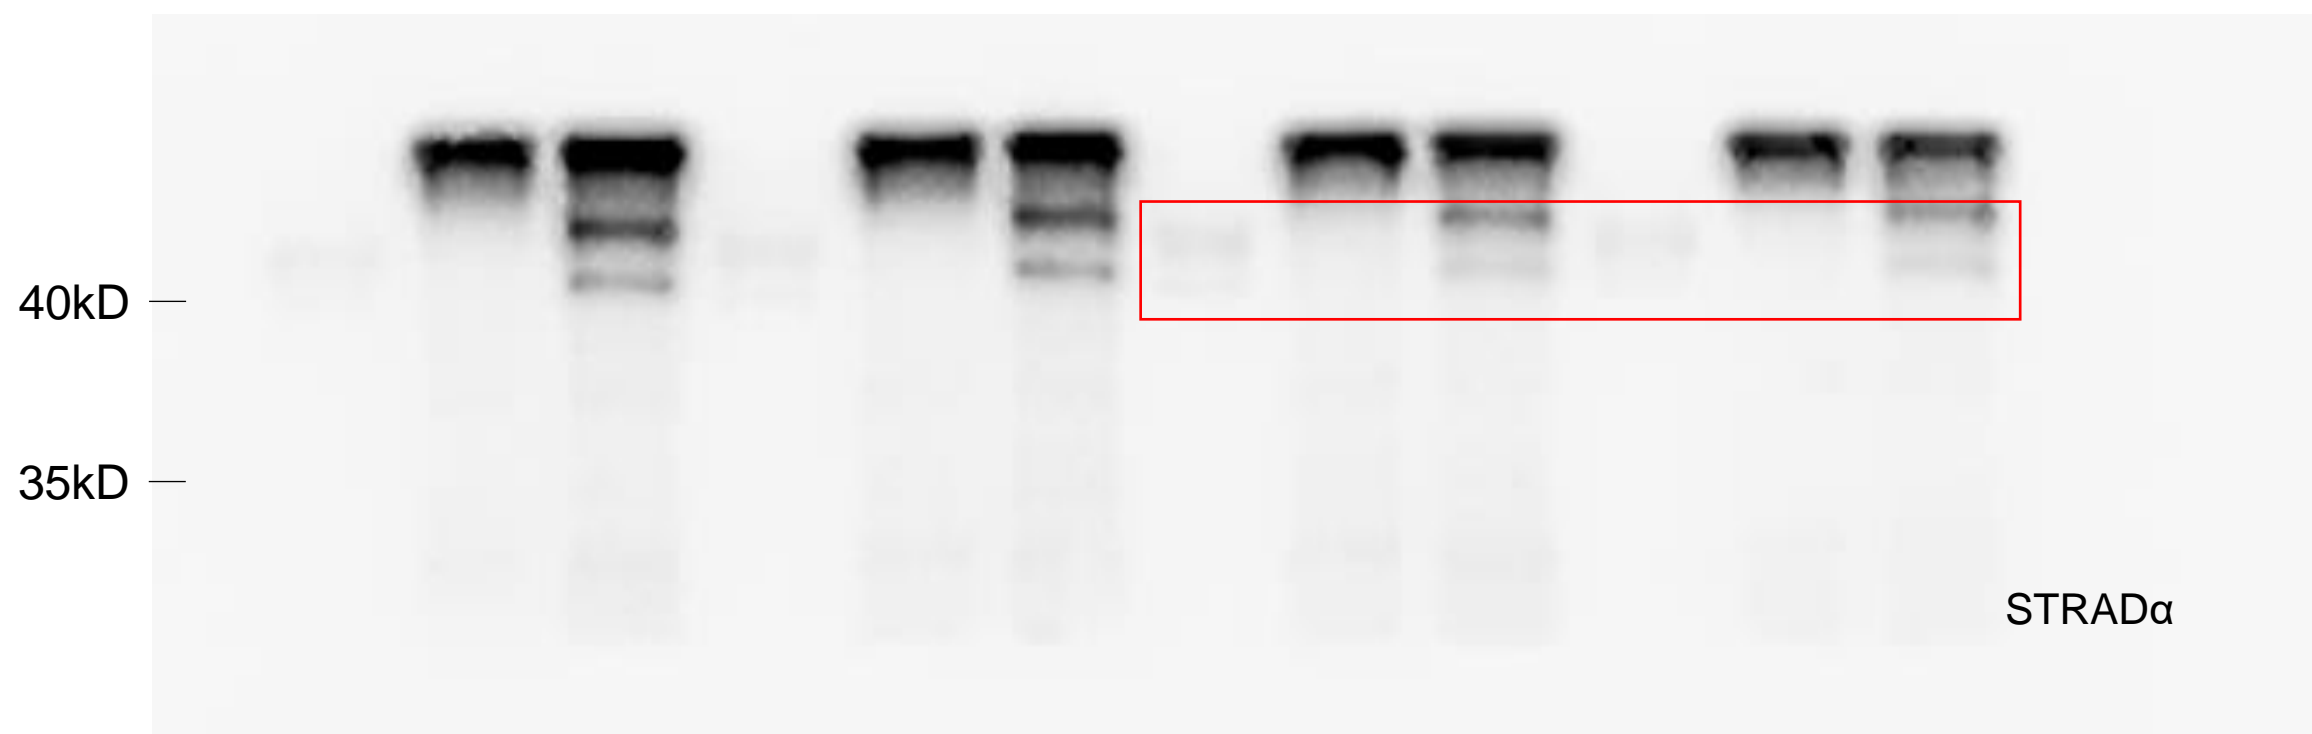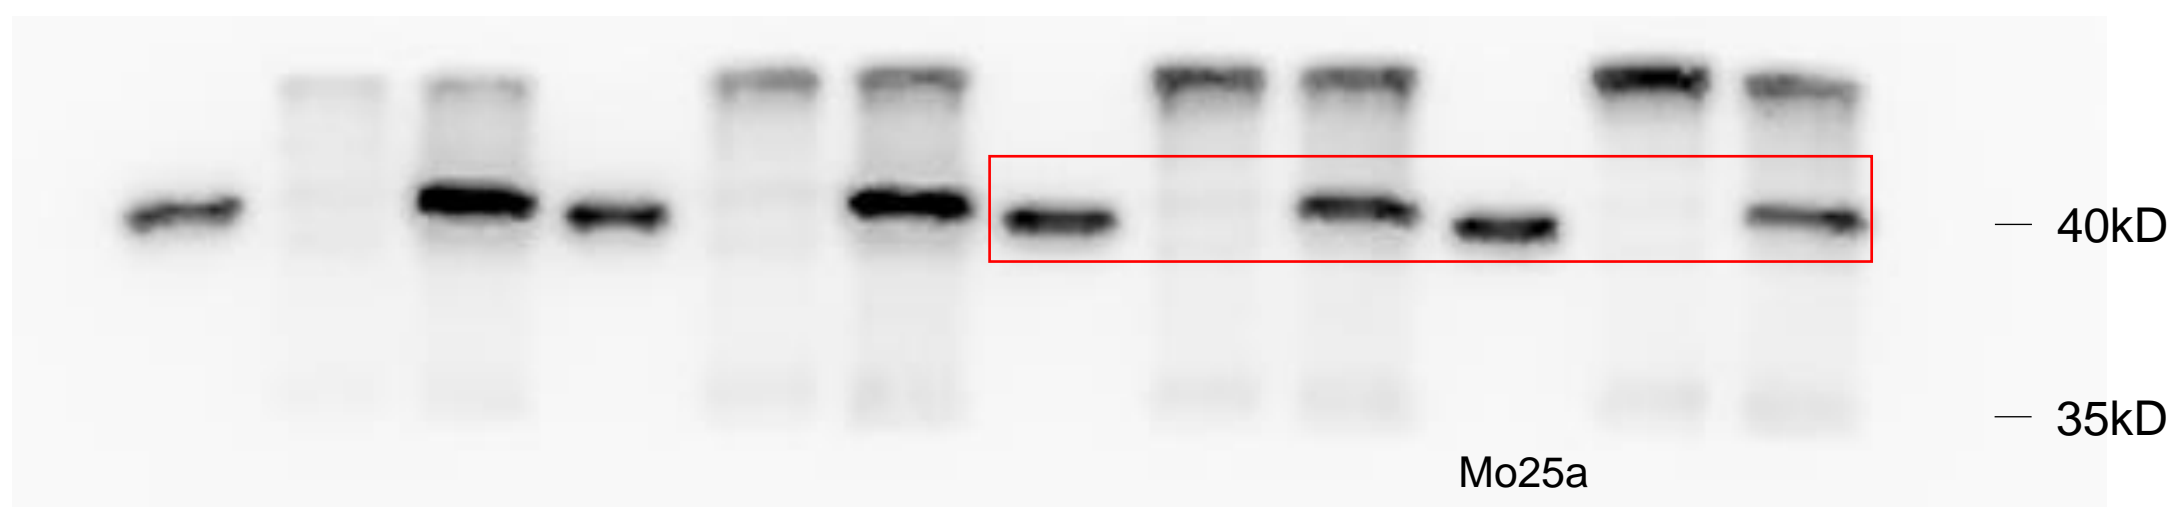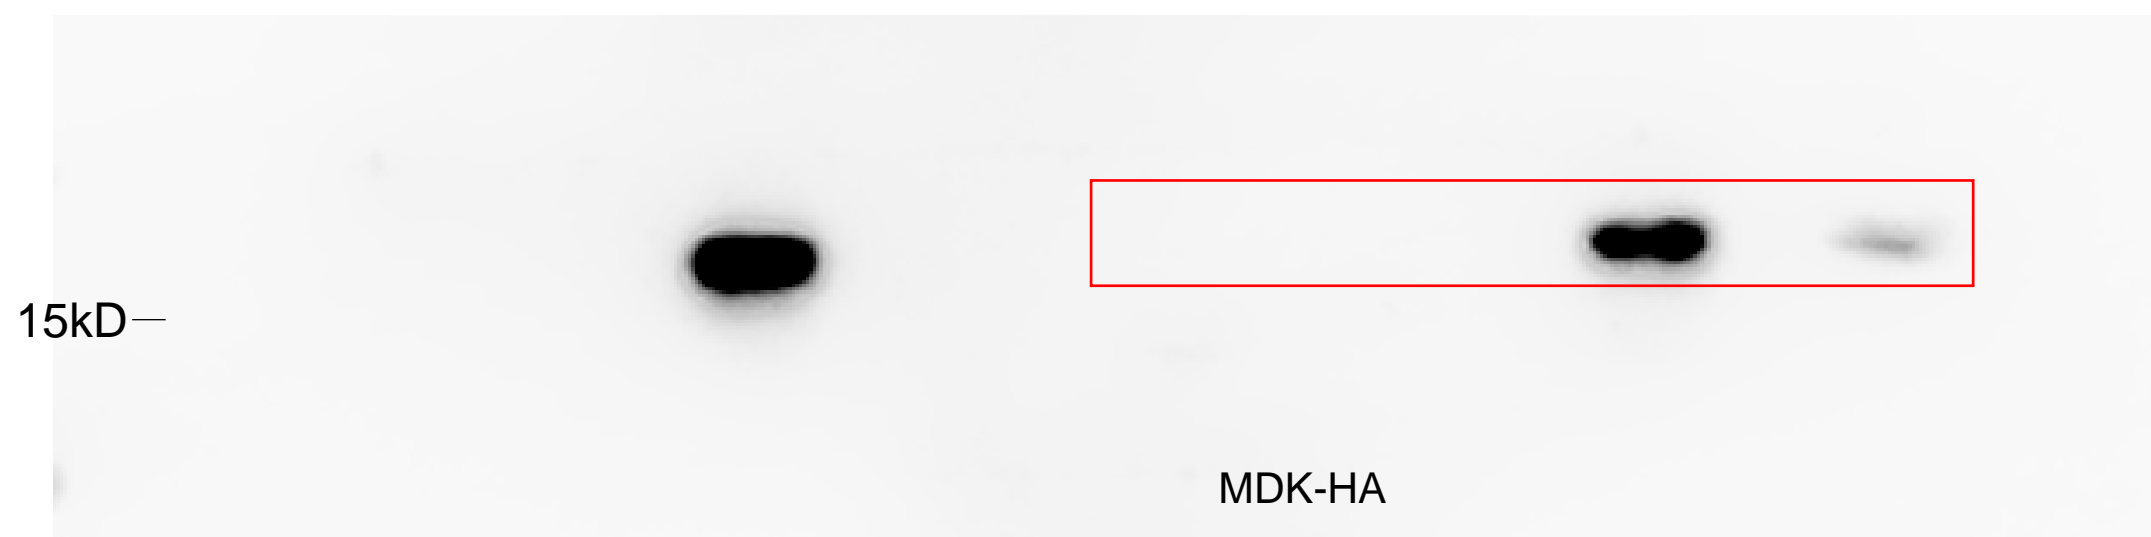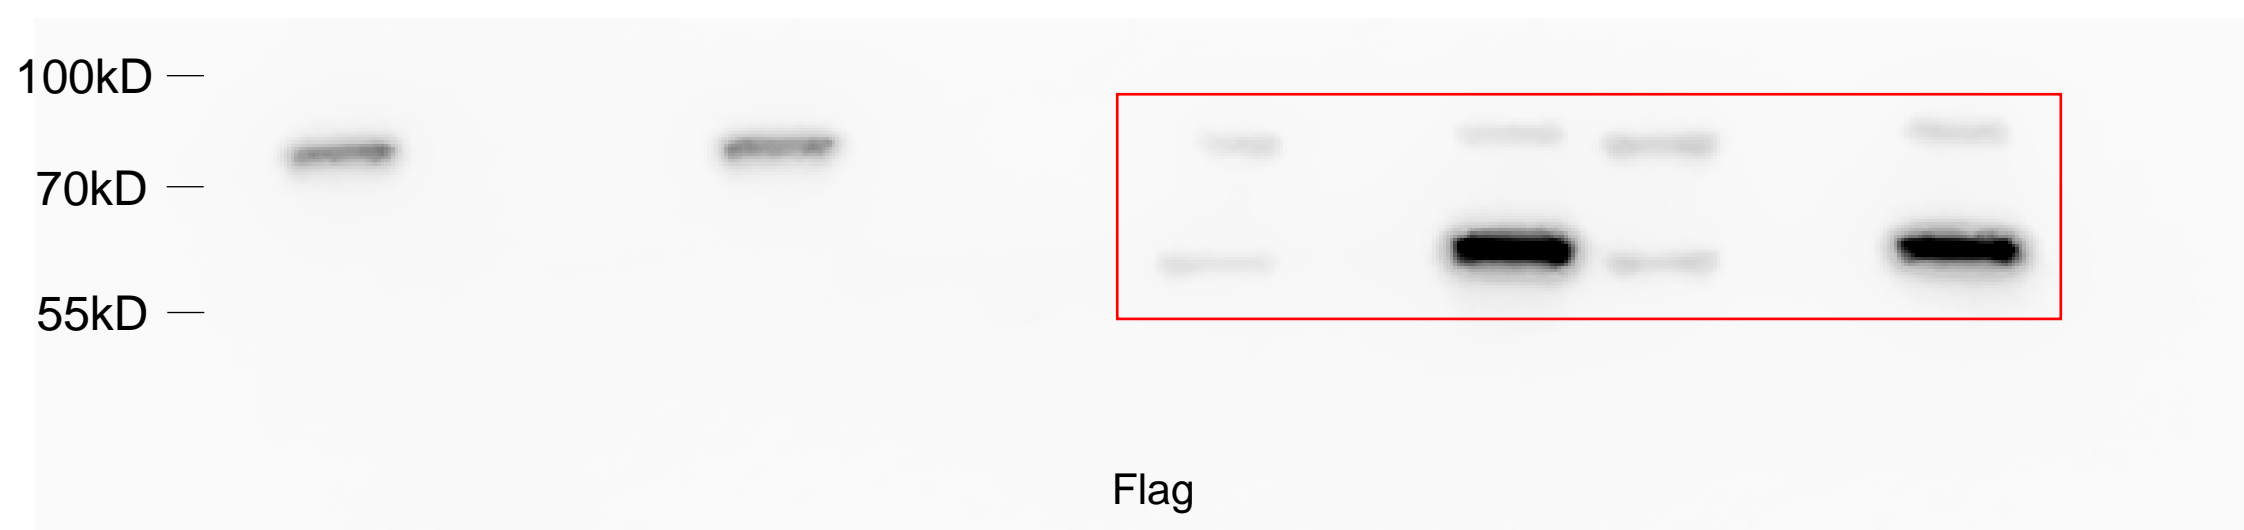

Fig.4D

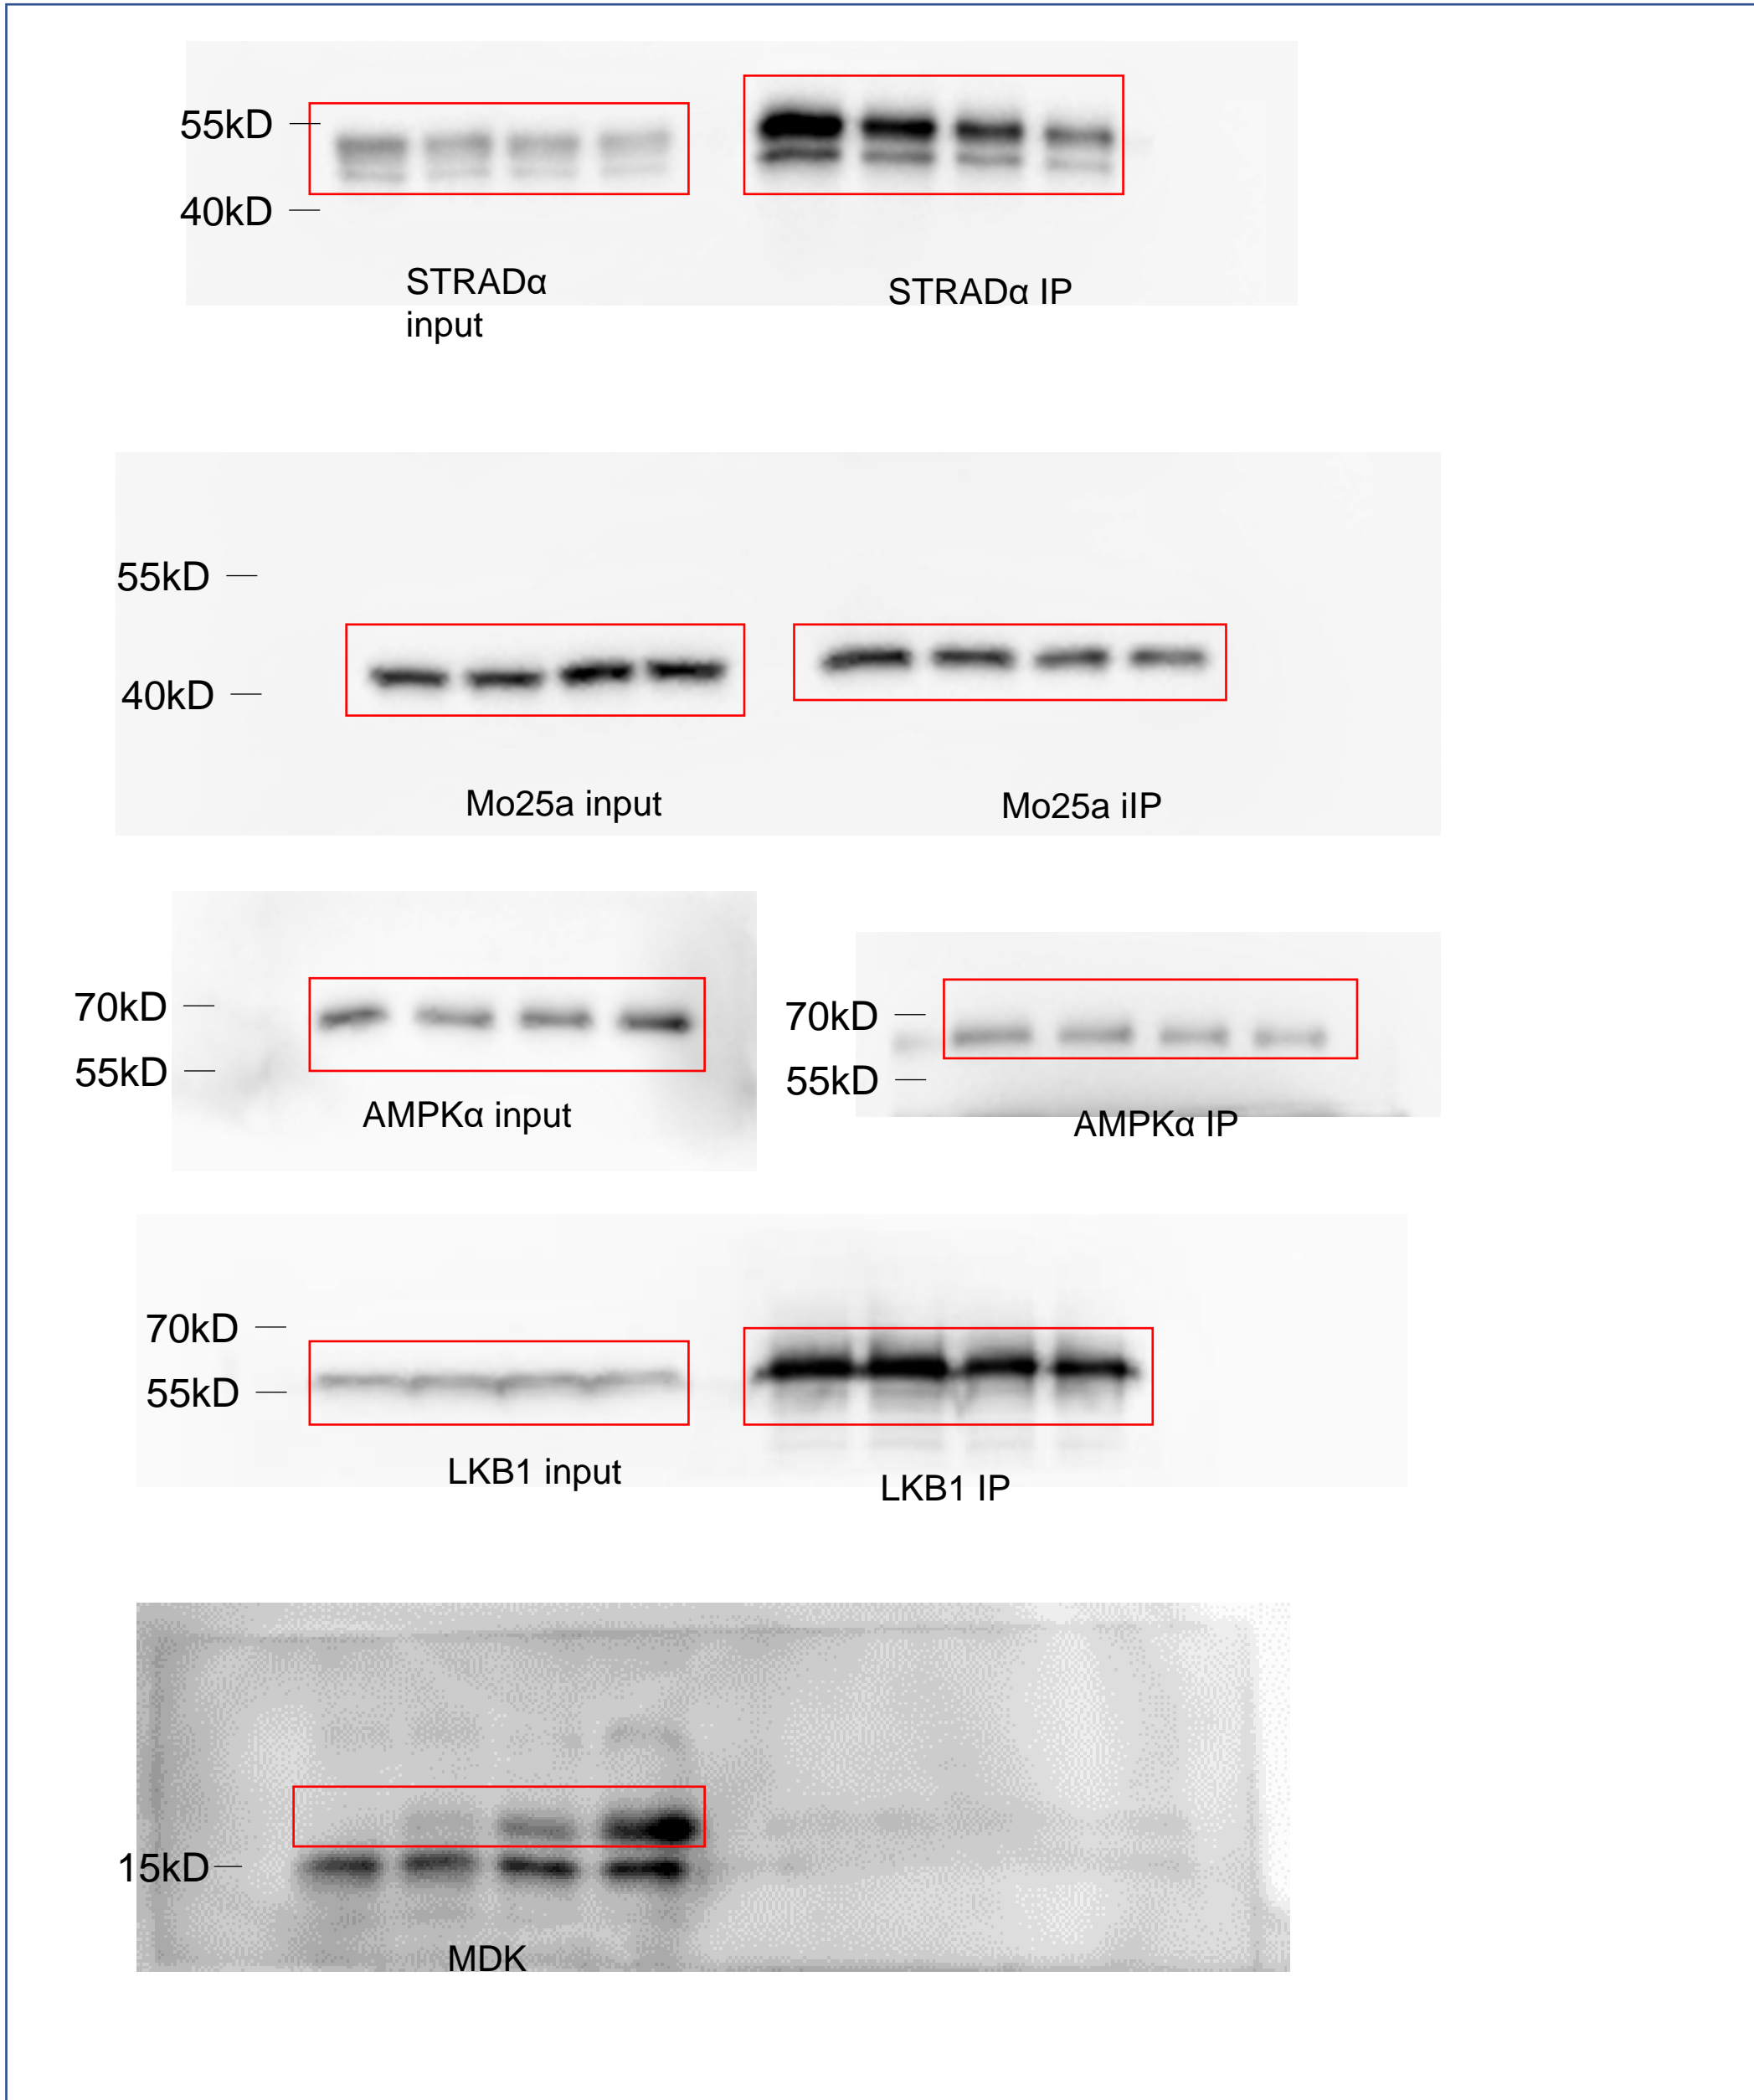

Fig.4E

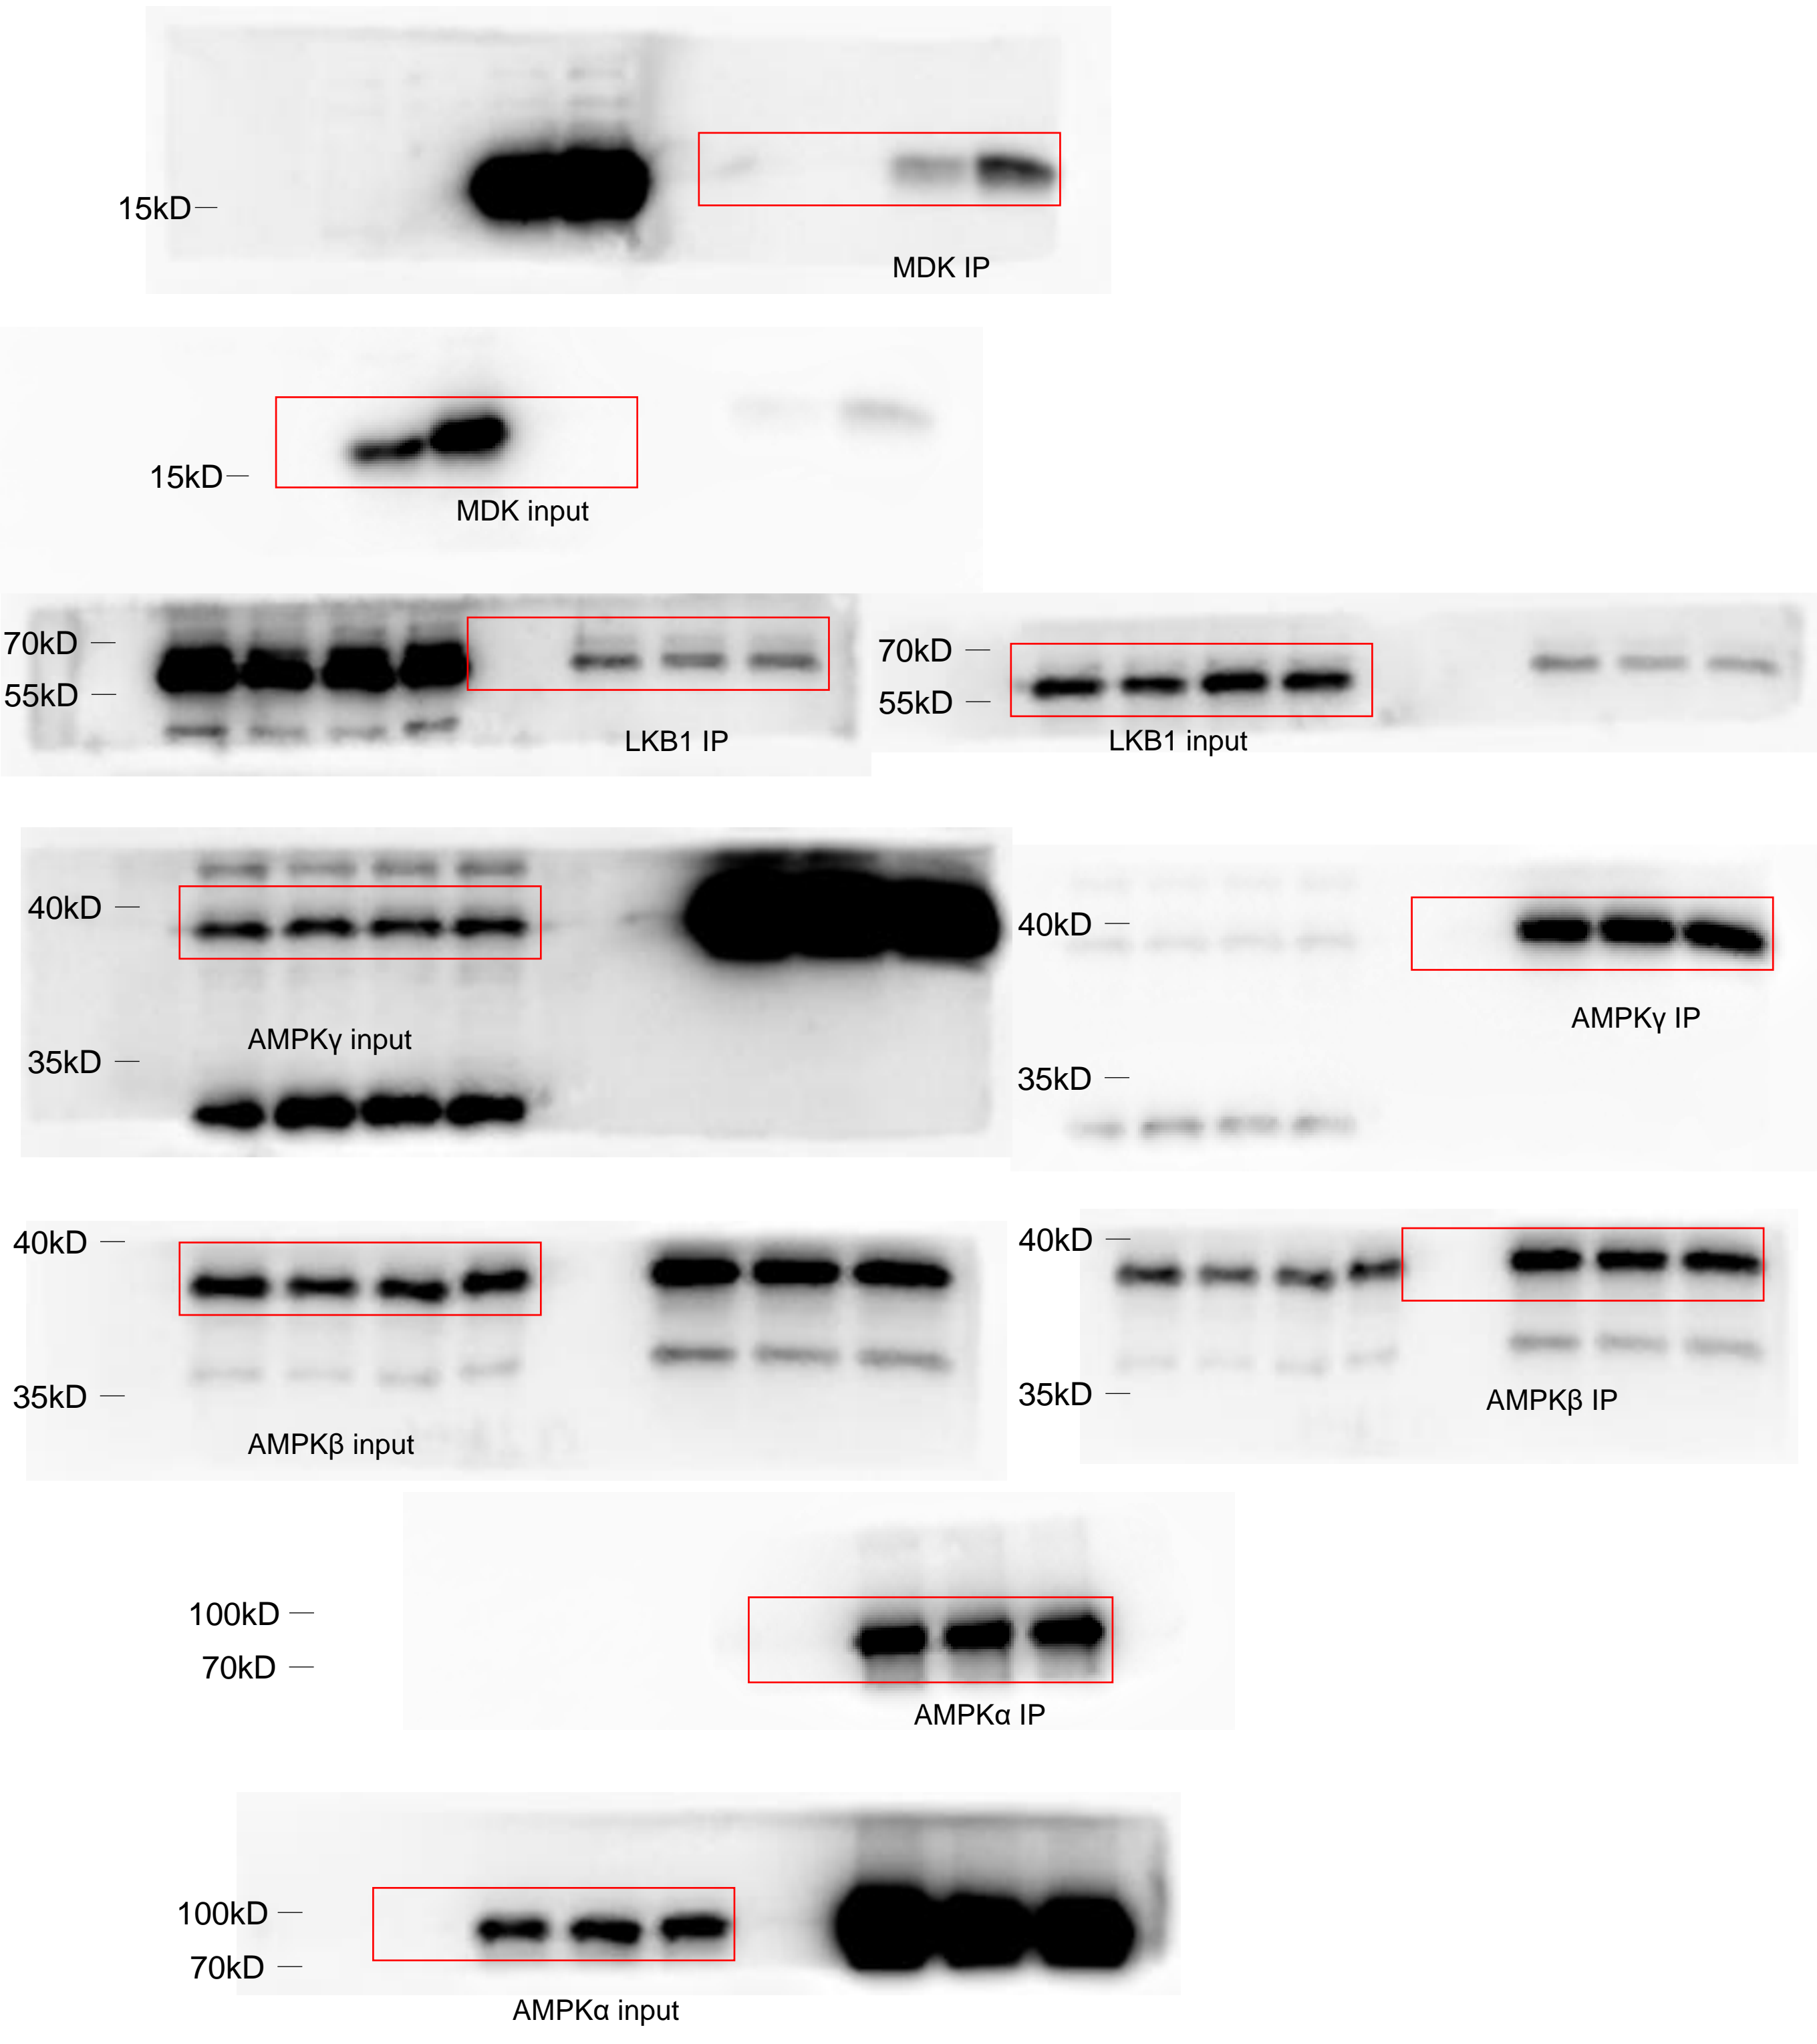

Fig.5C

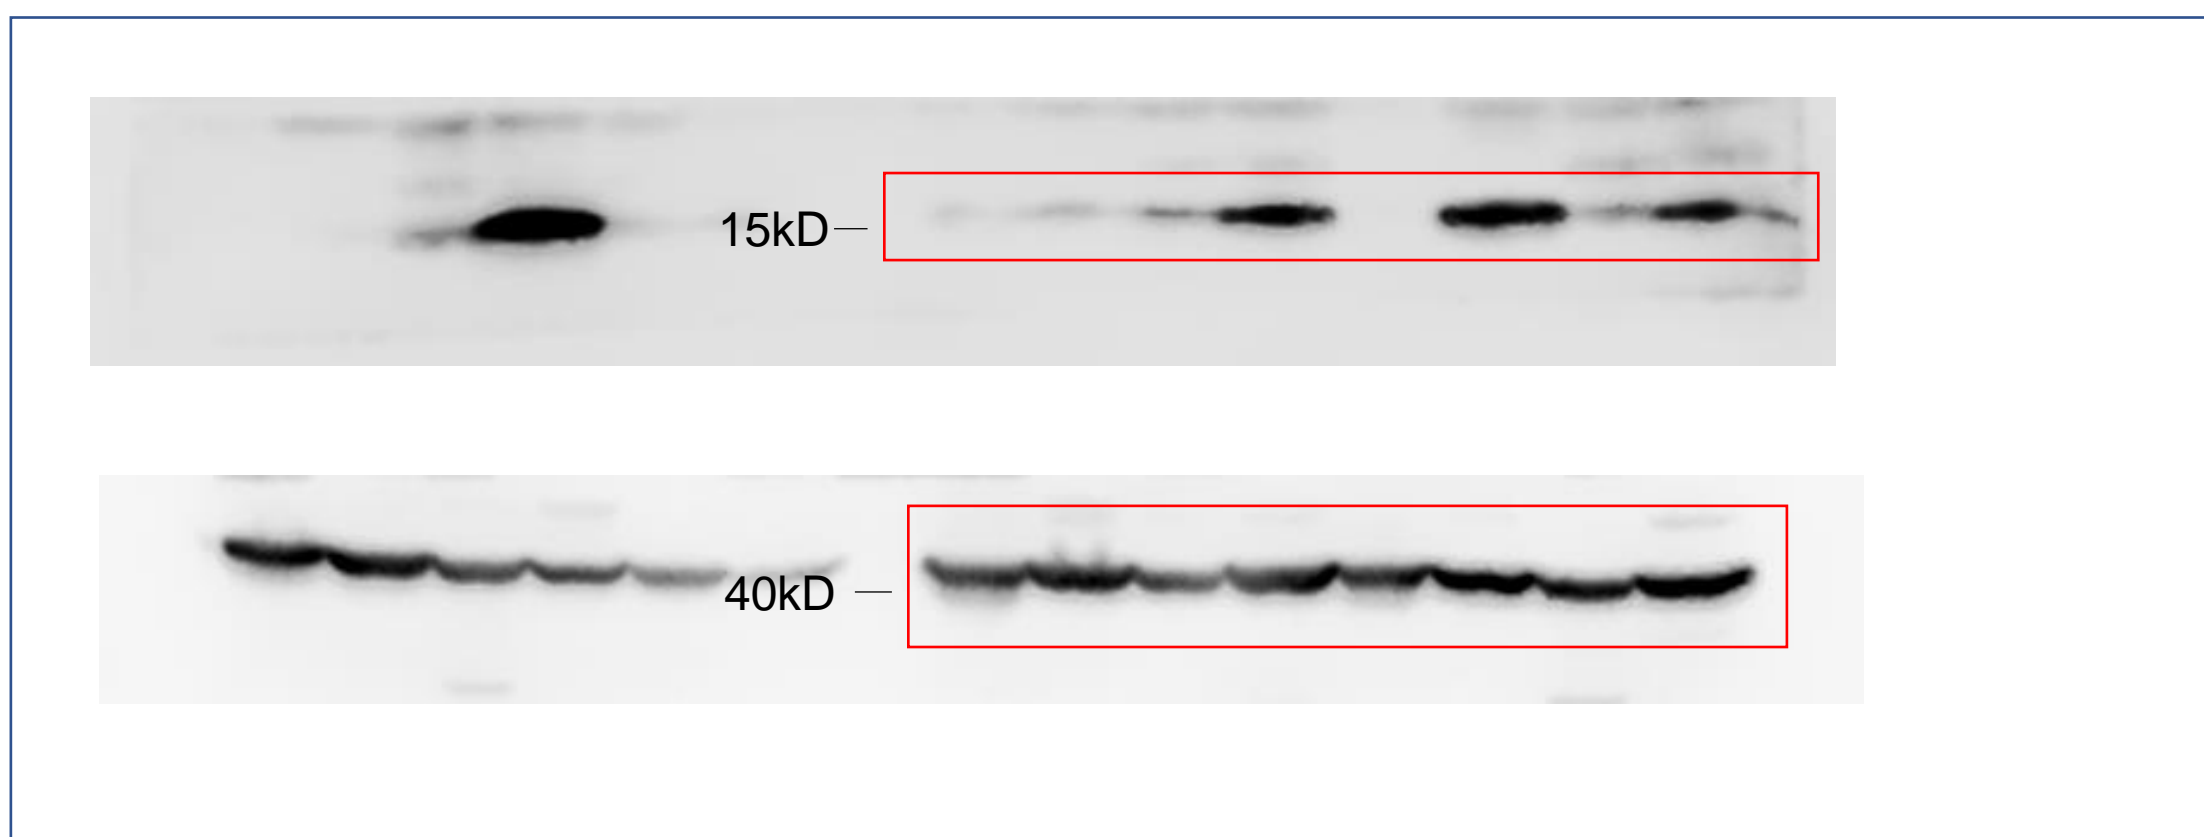

Fig.6A

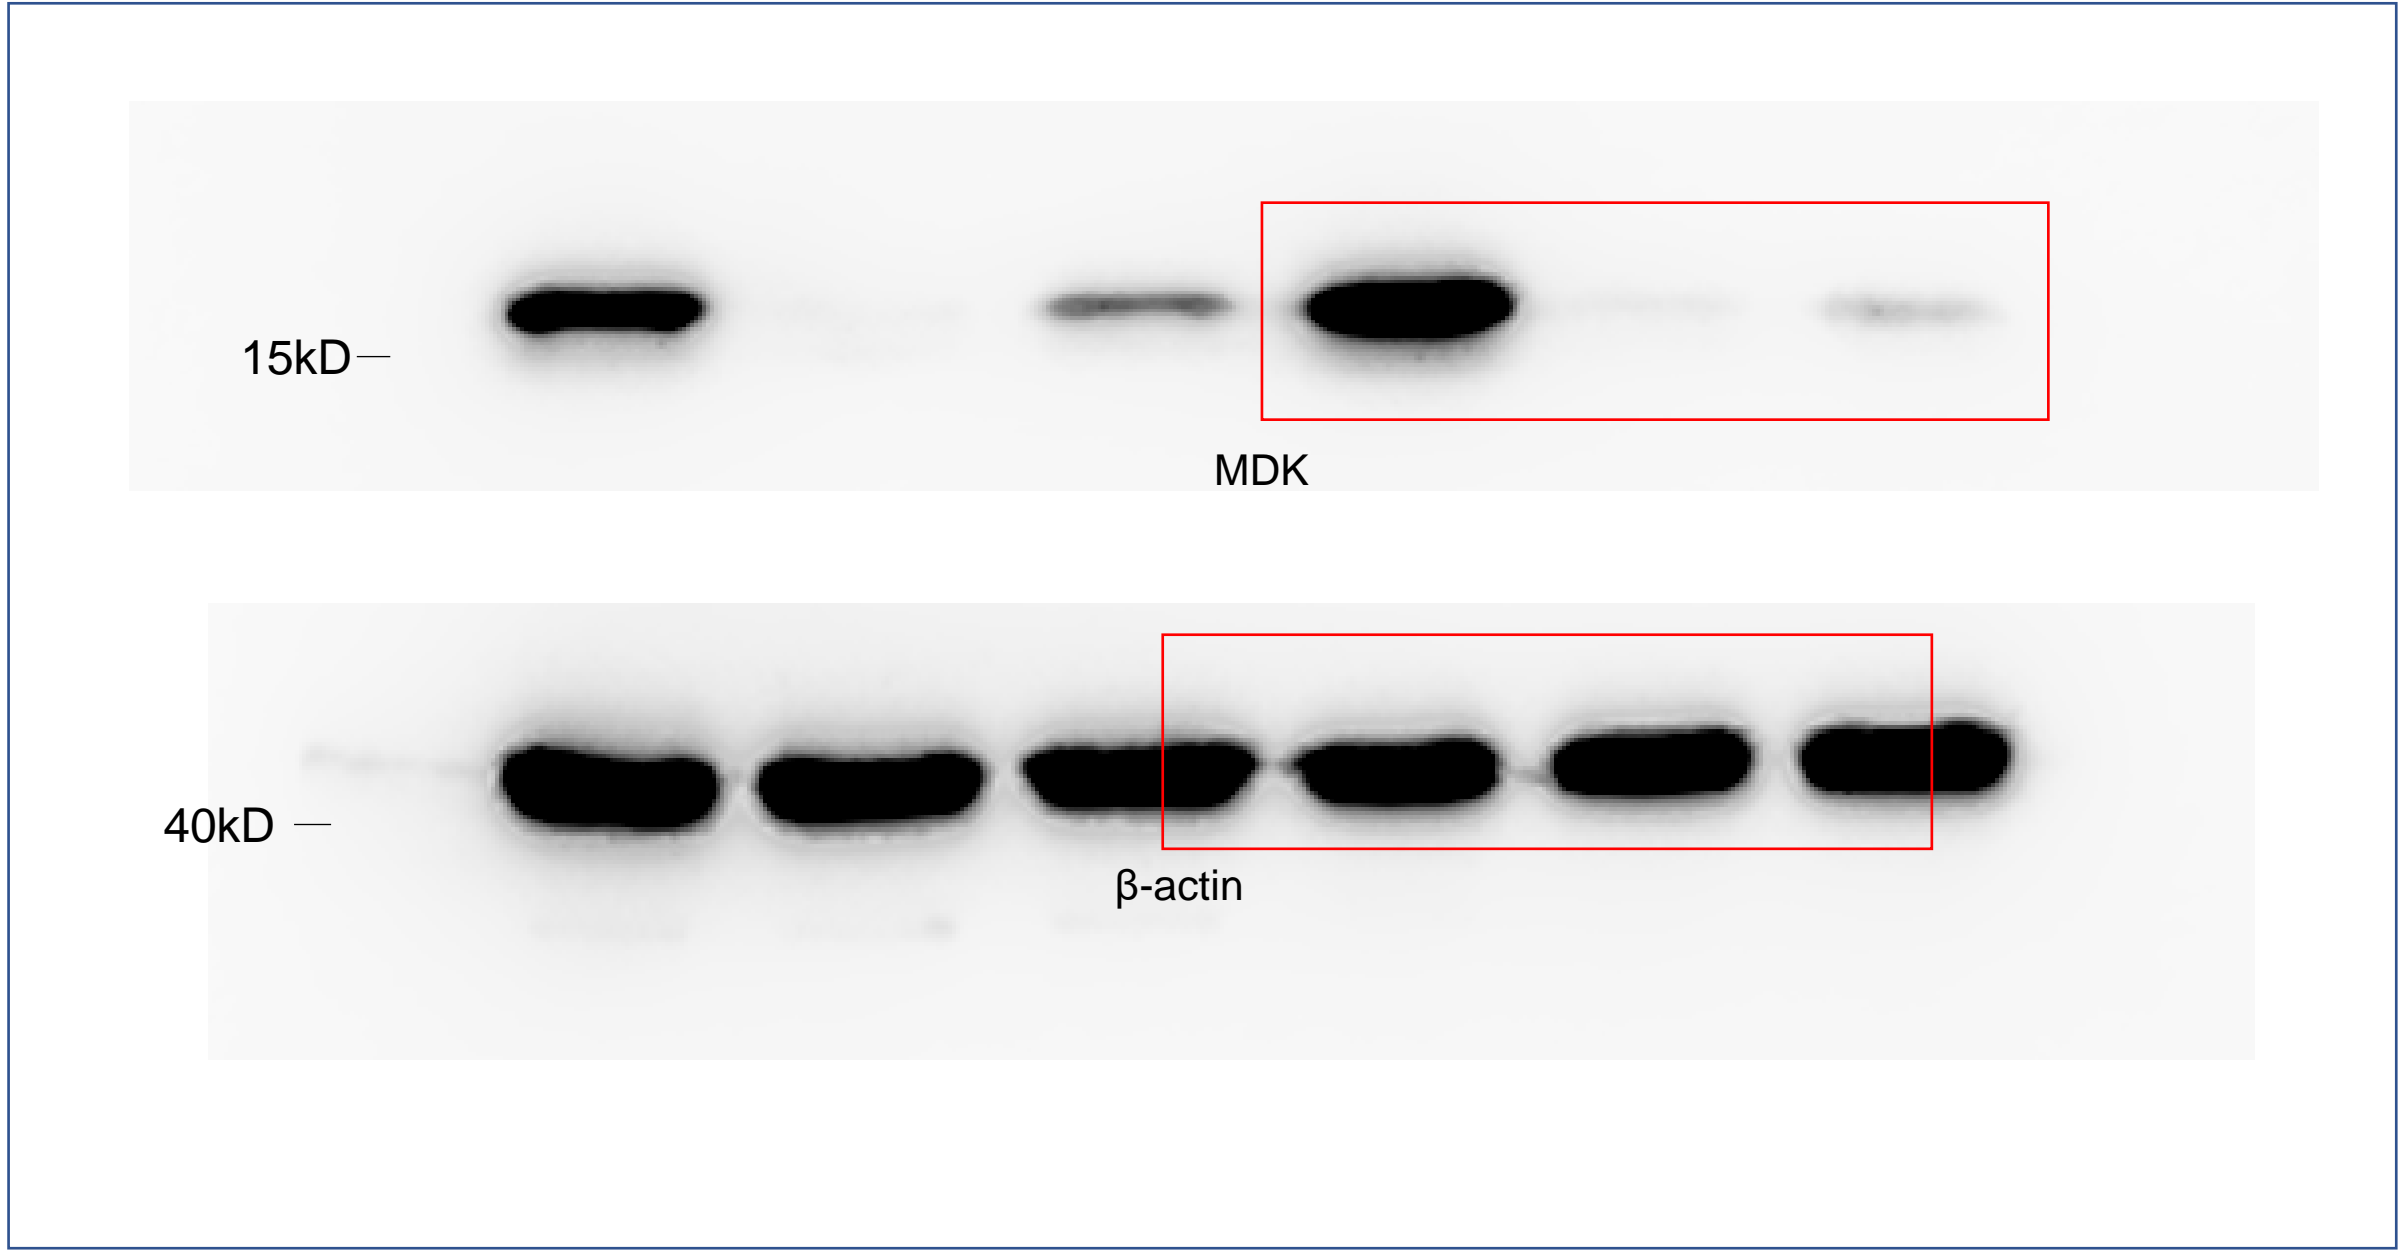

Fig.6C

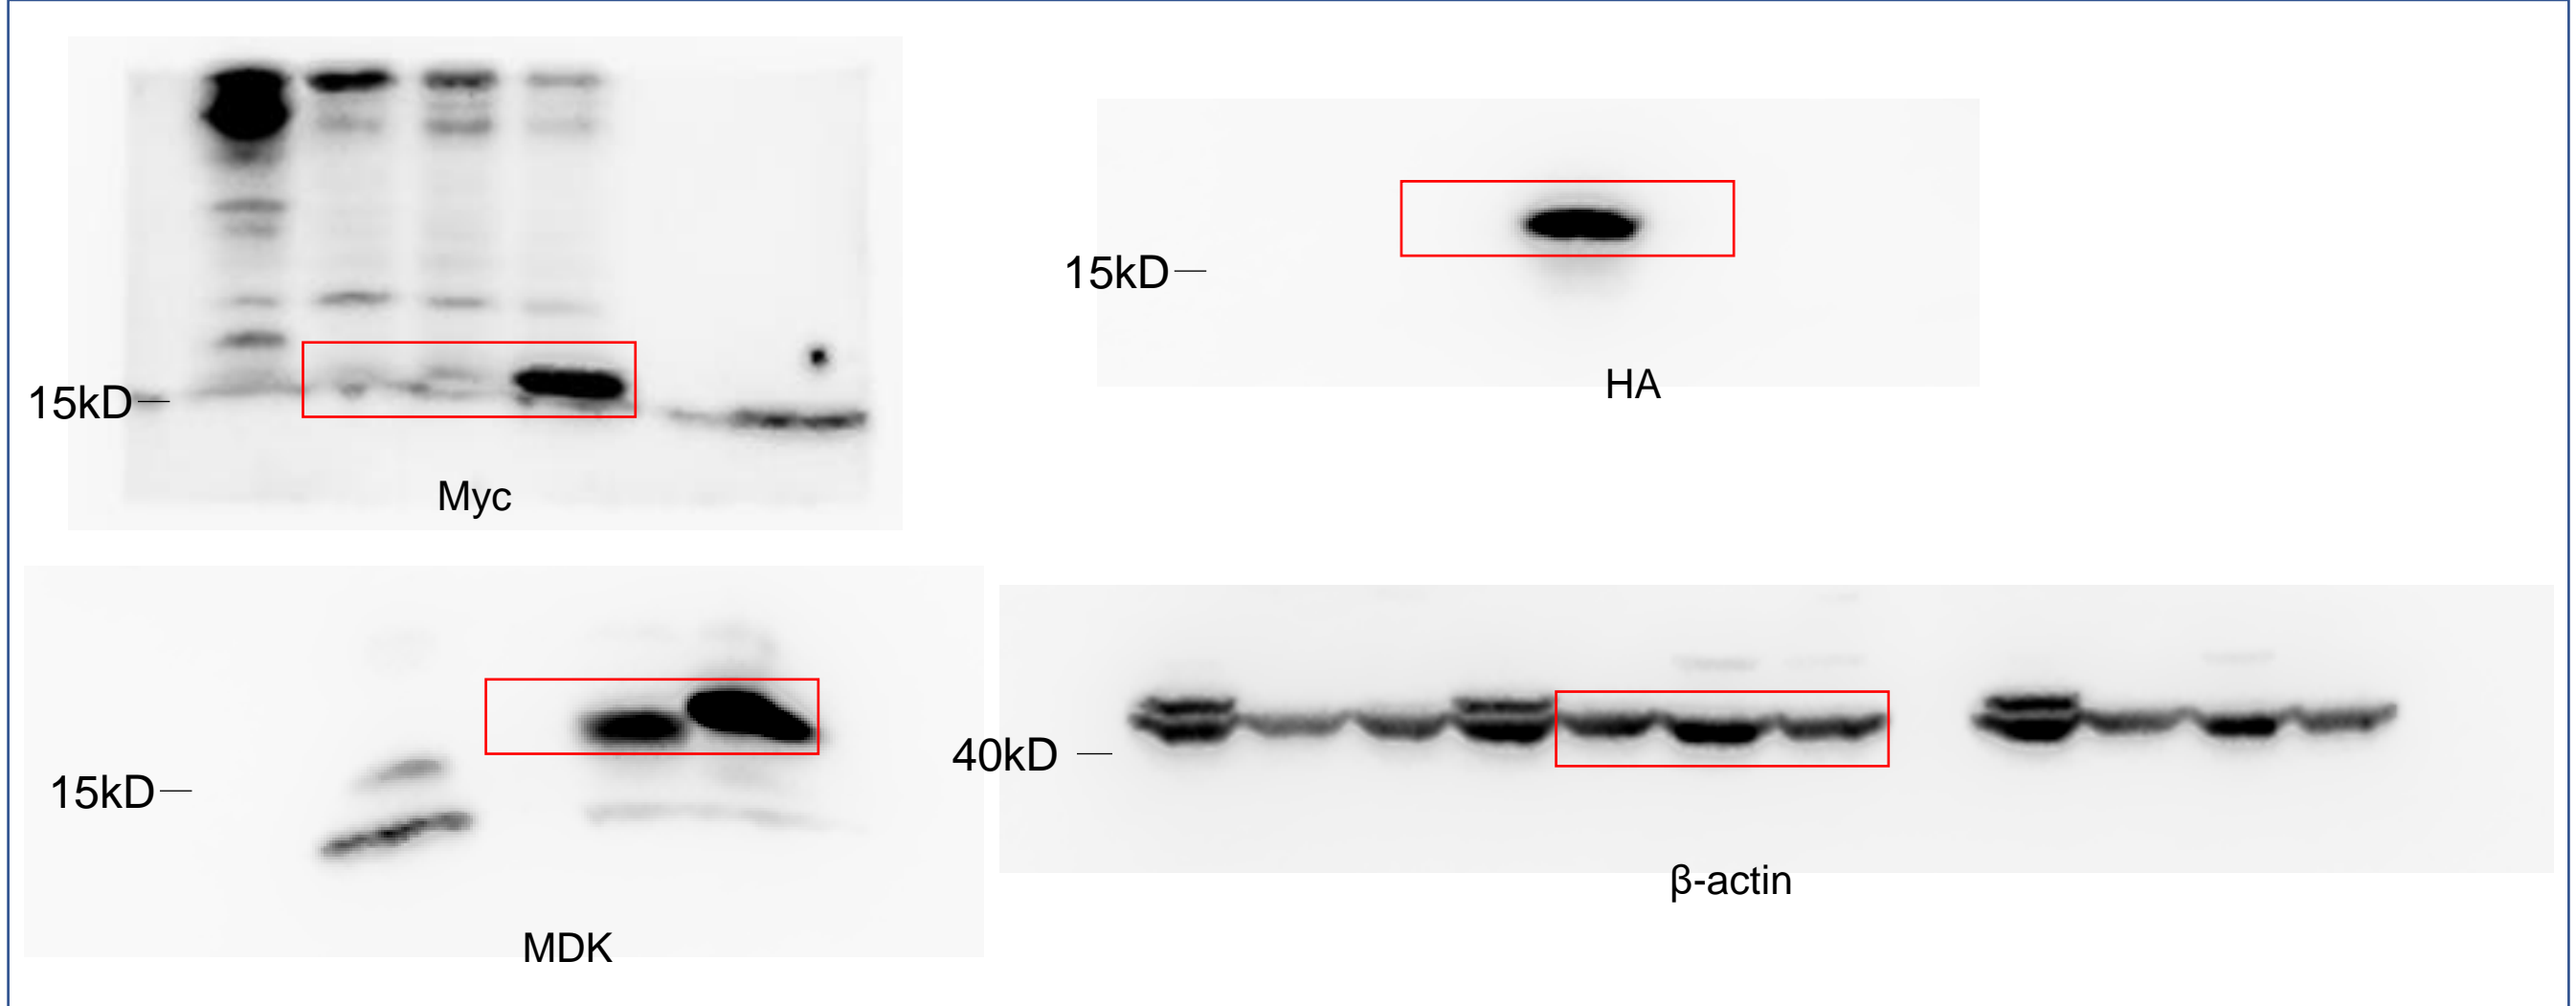

Fig.6E

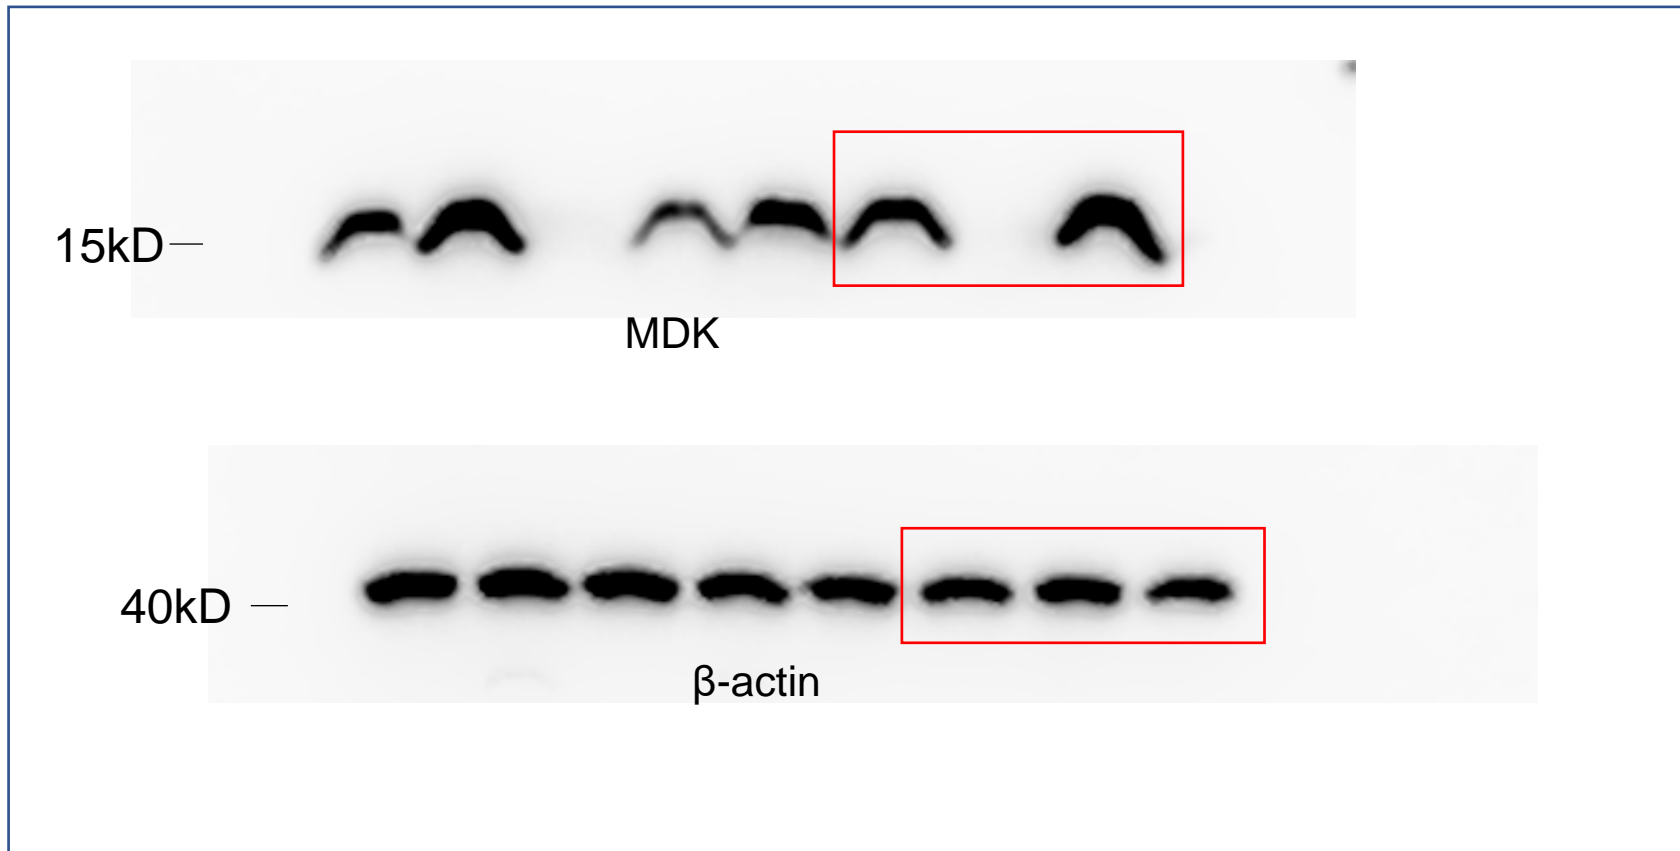

Fig.6G

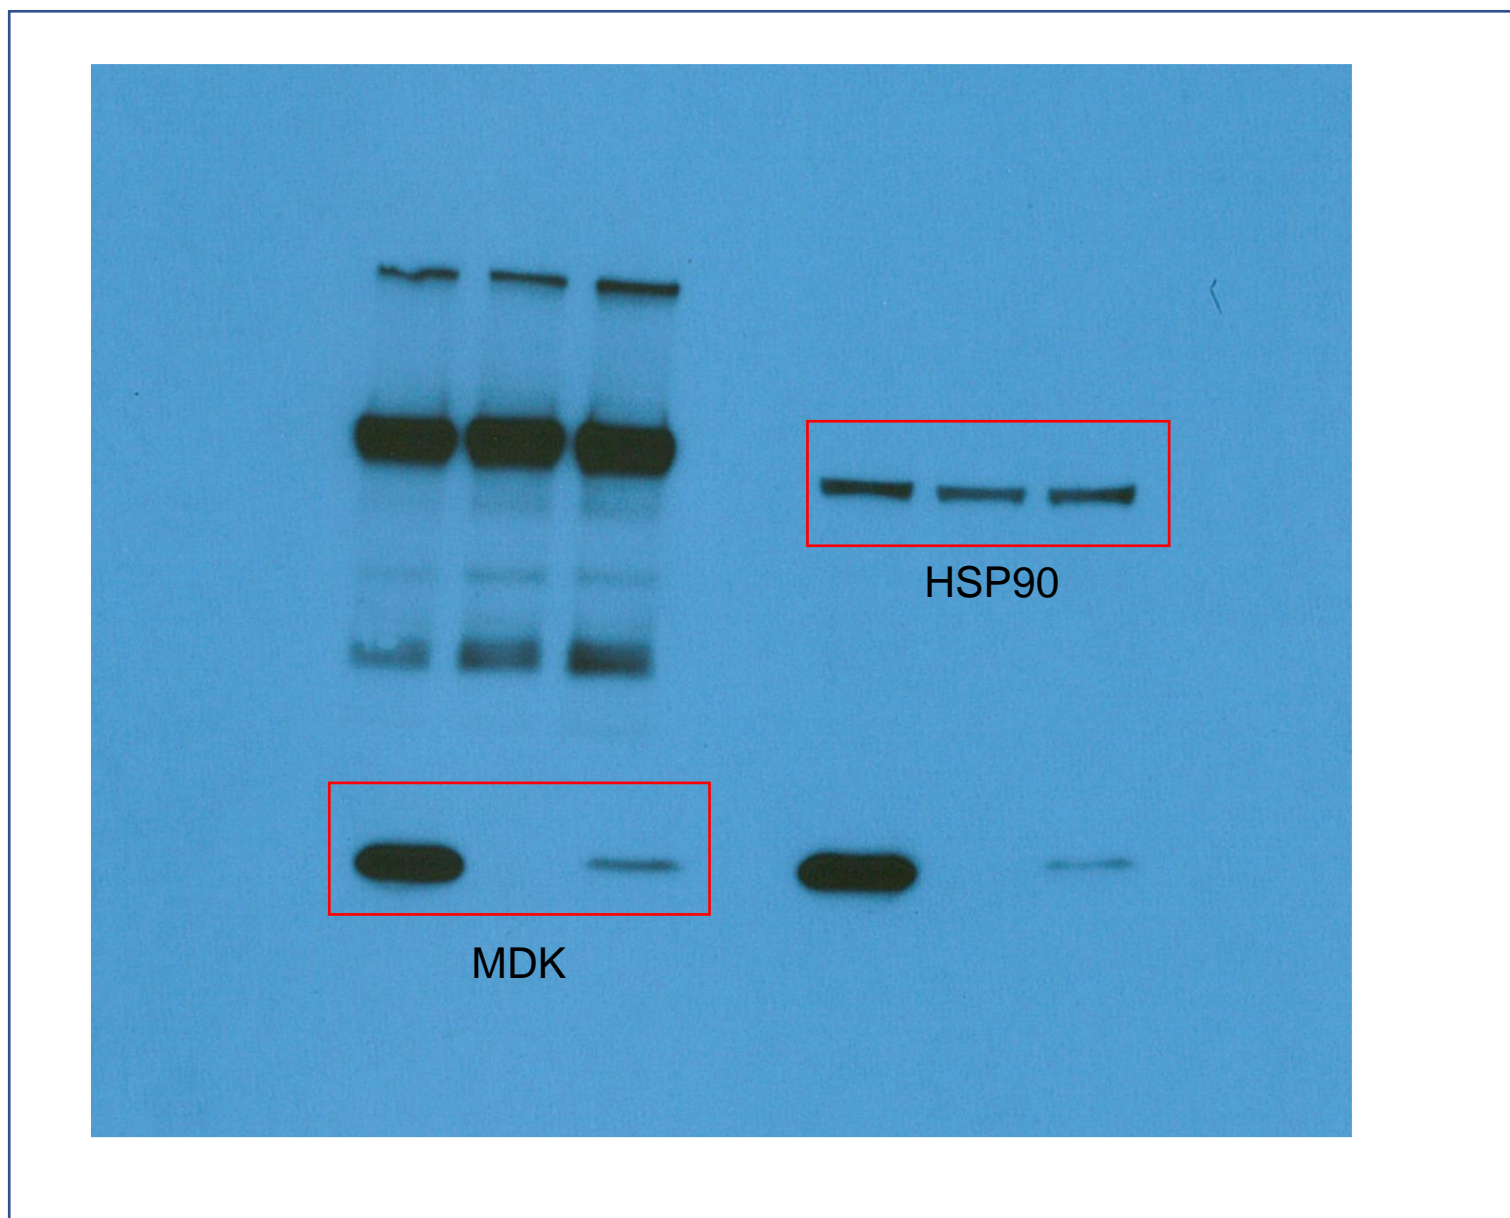

Fig.6H

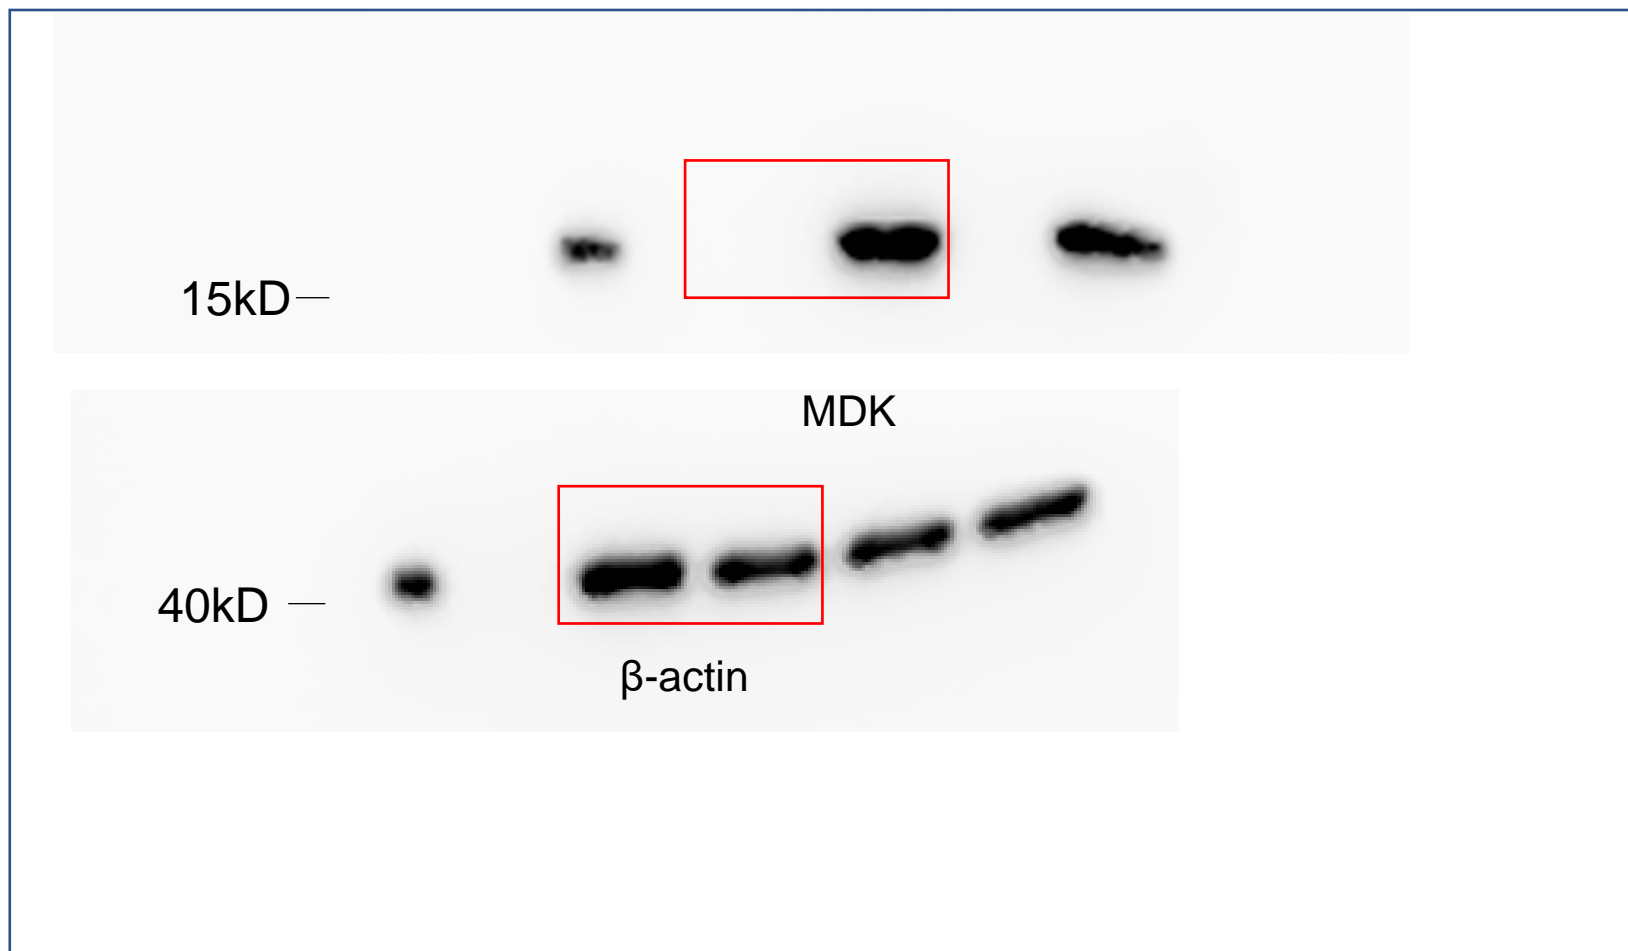

Figure 7a

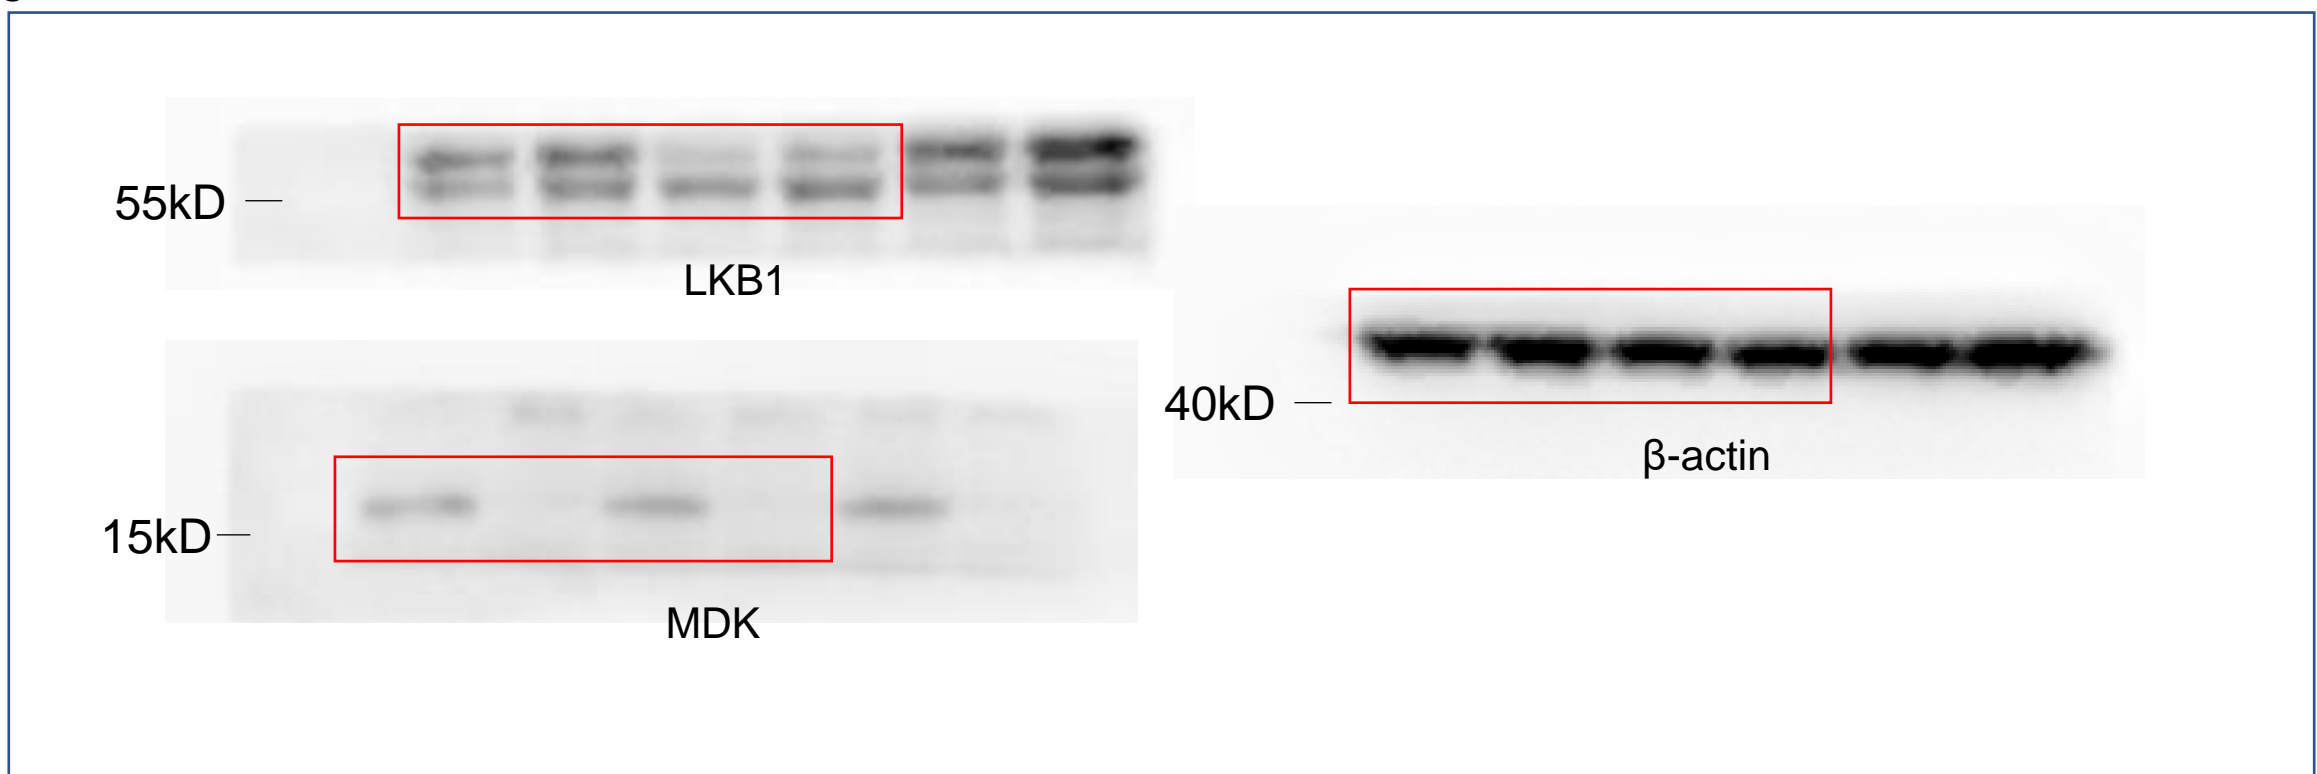

Supplemental Figure 1A,B

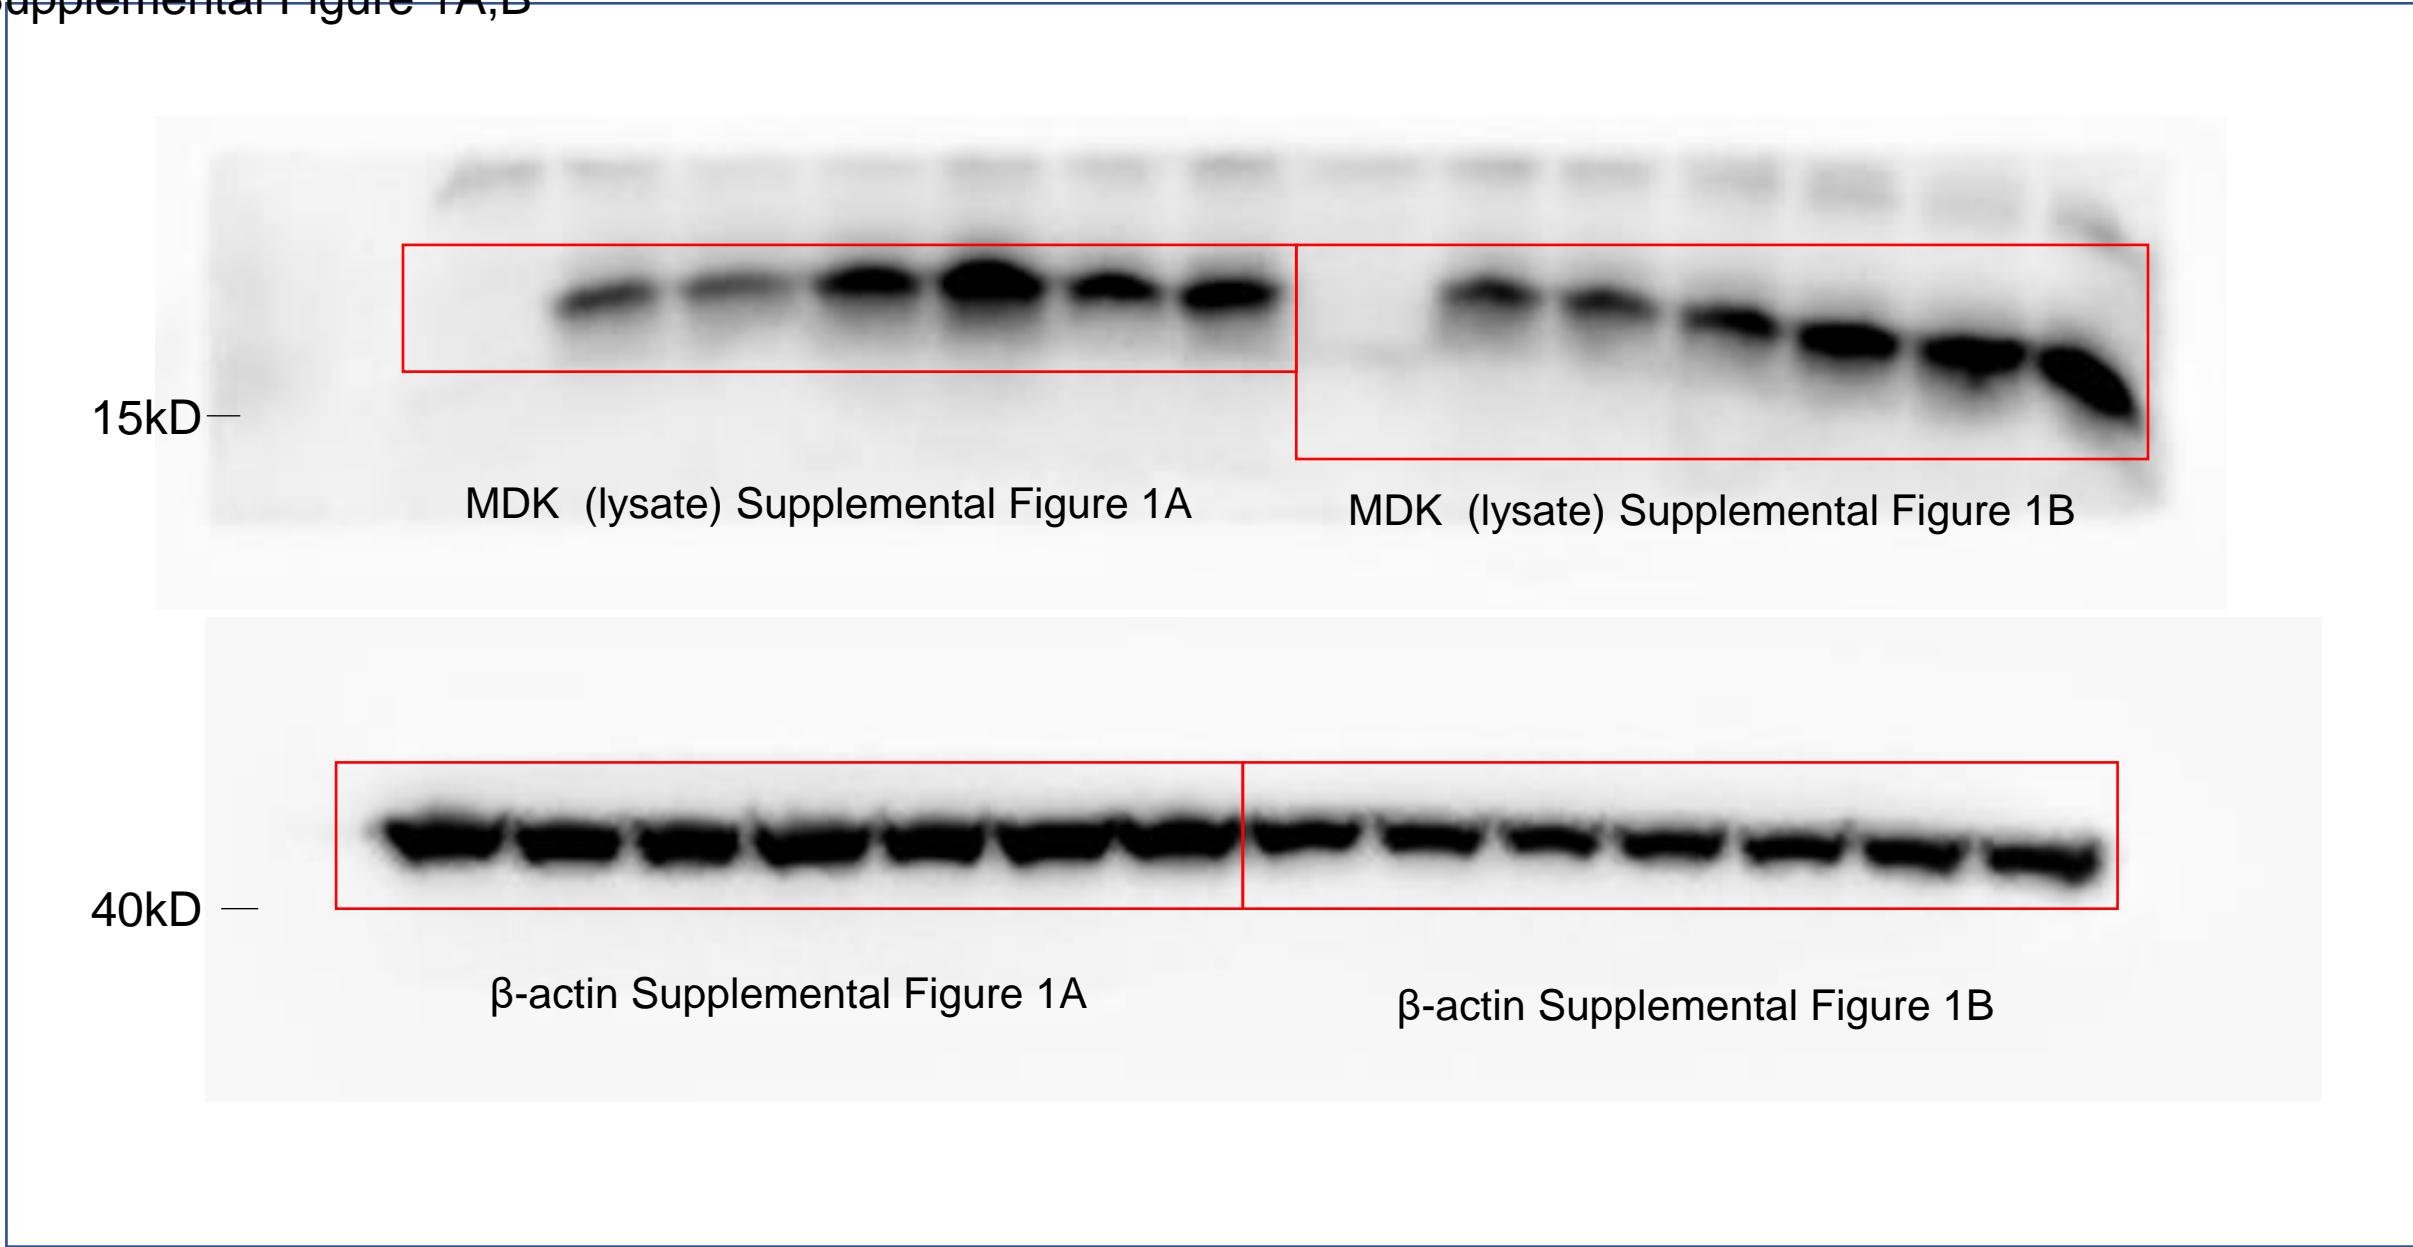

Supplemental Figure 1C

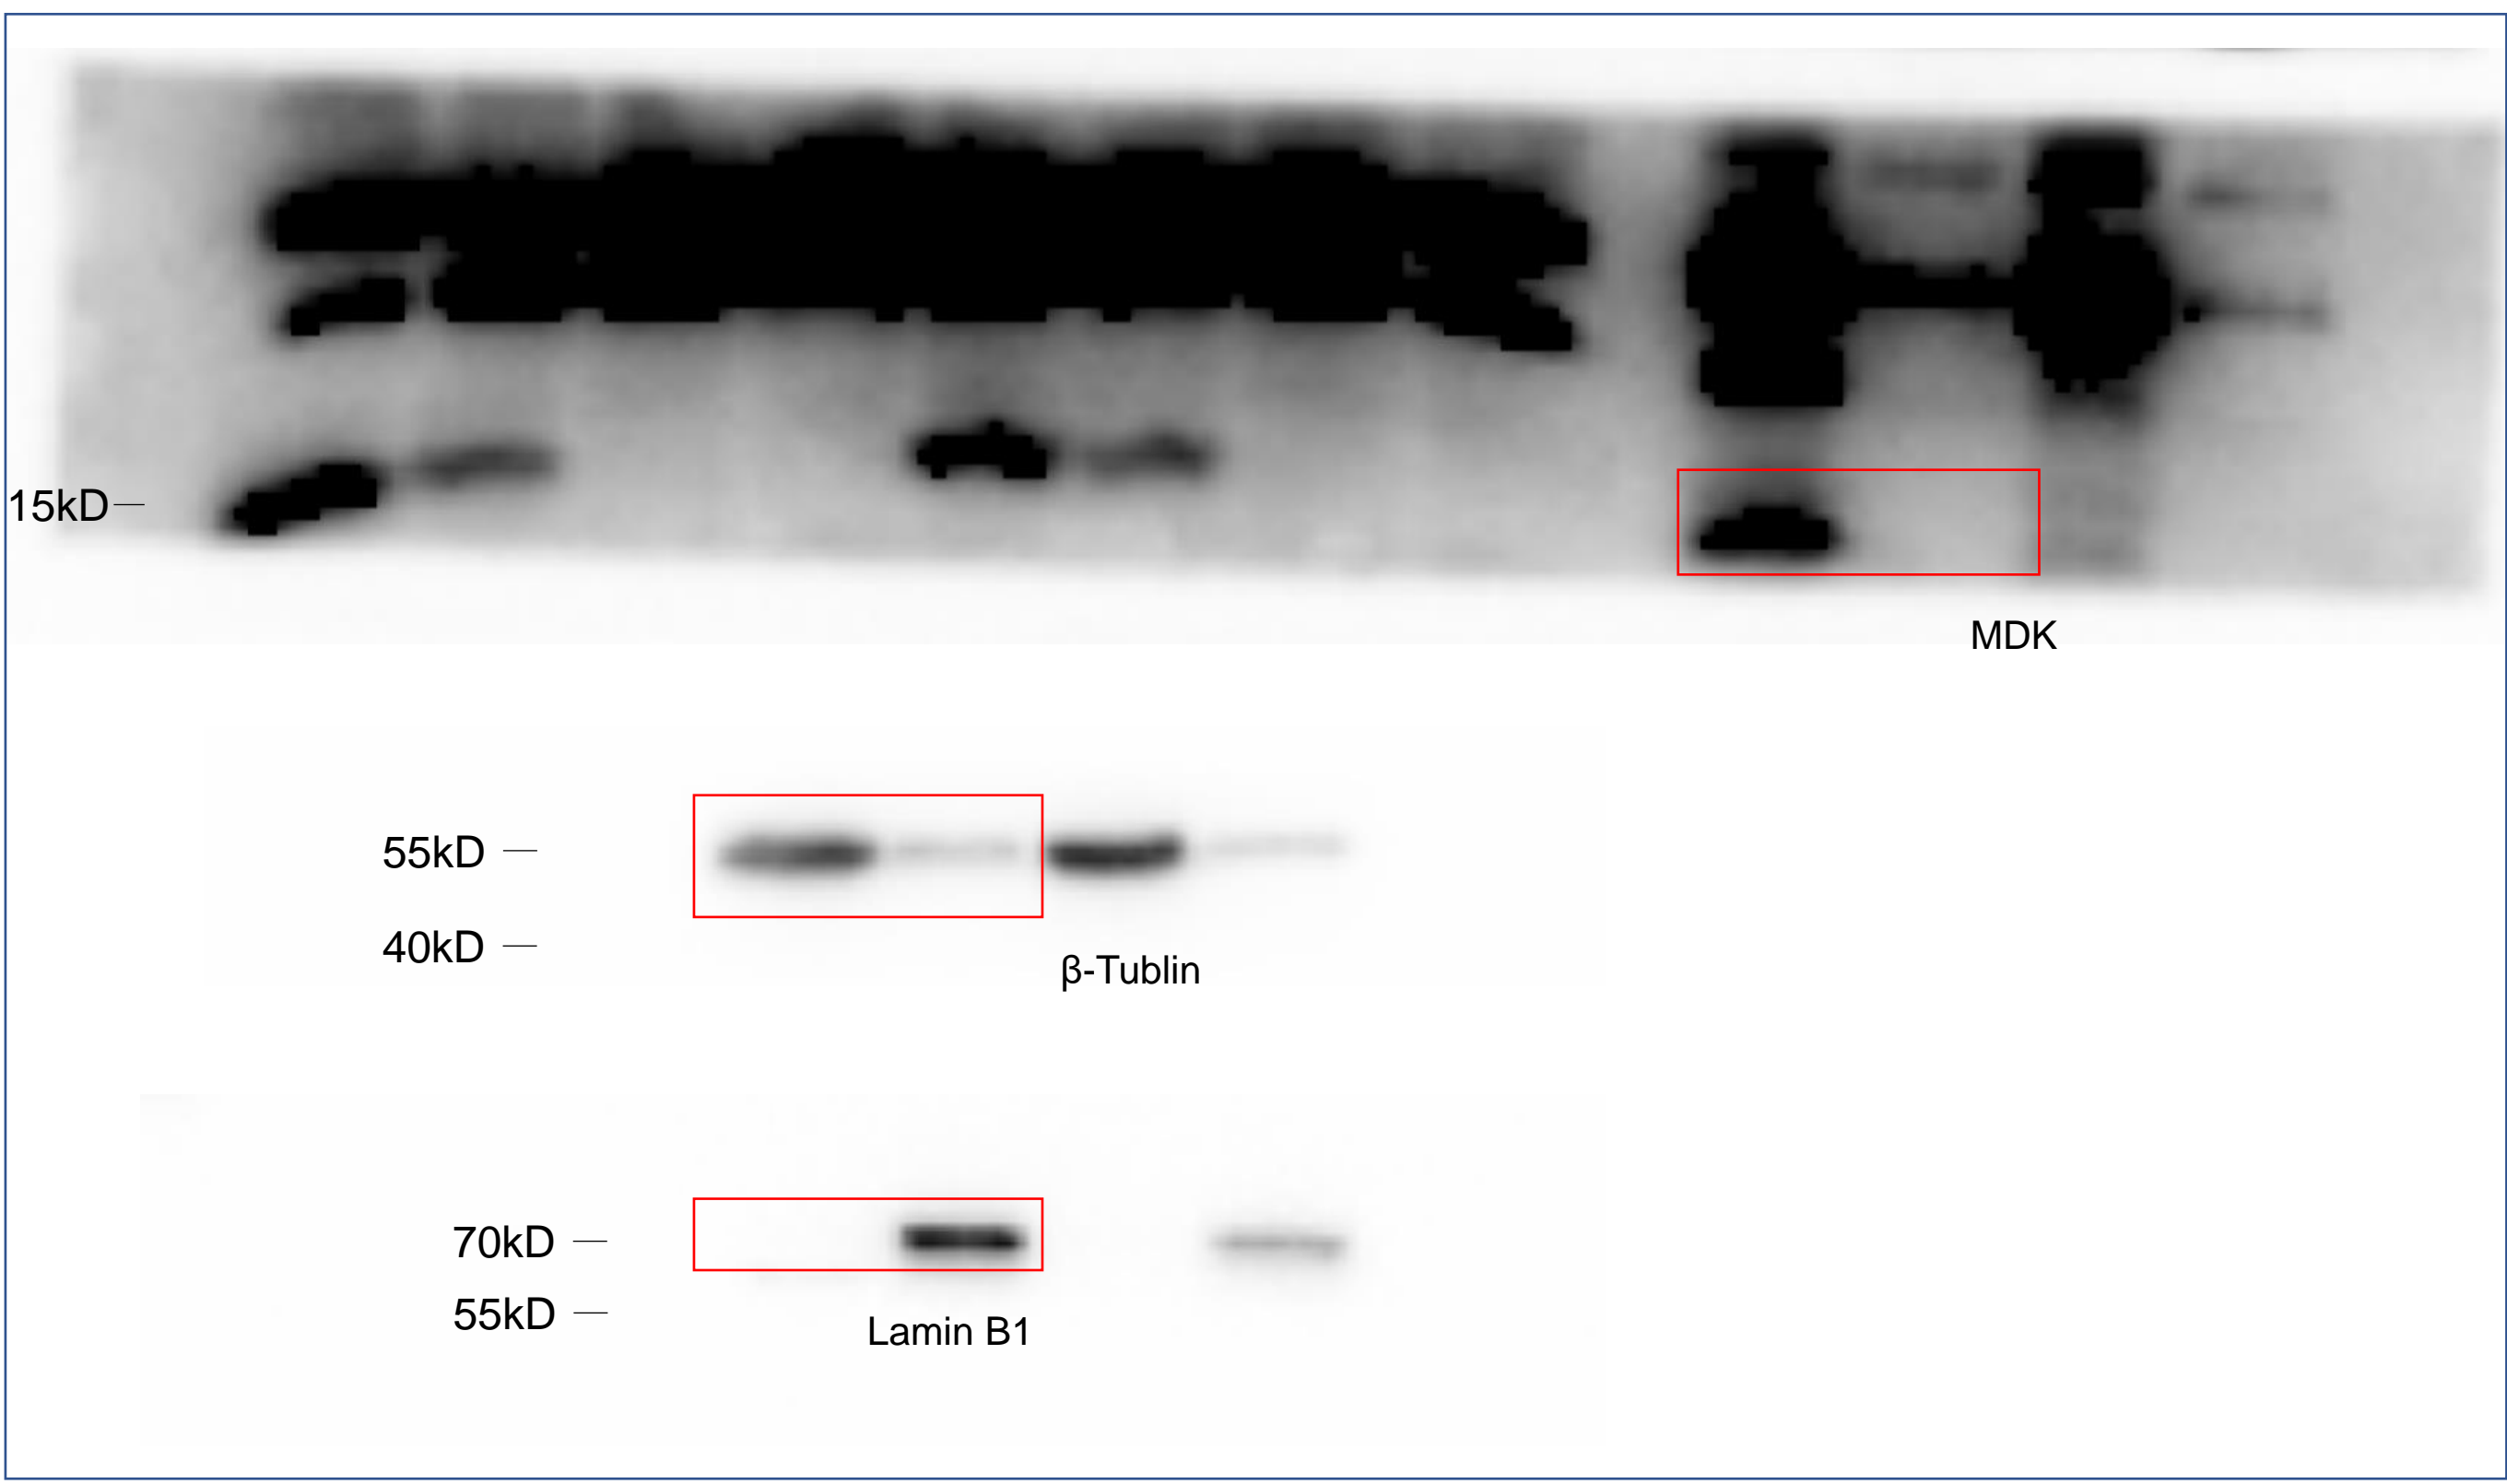

Supplemental Figure 1D

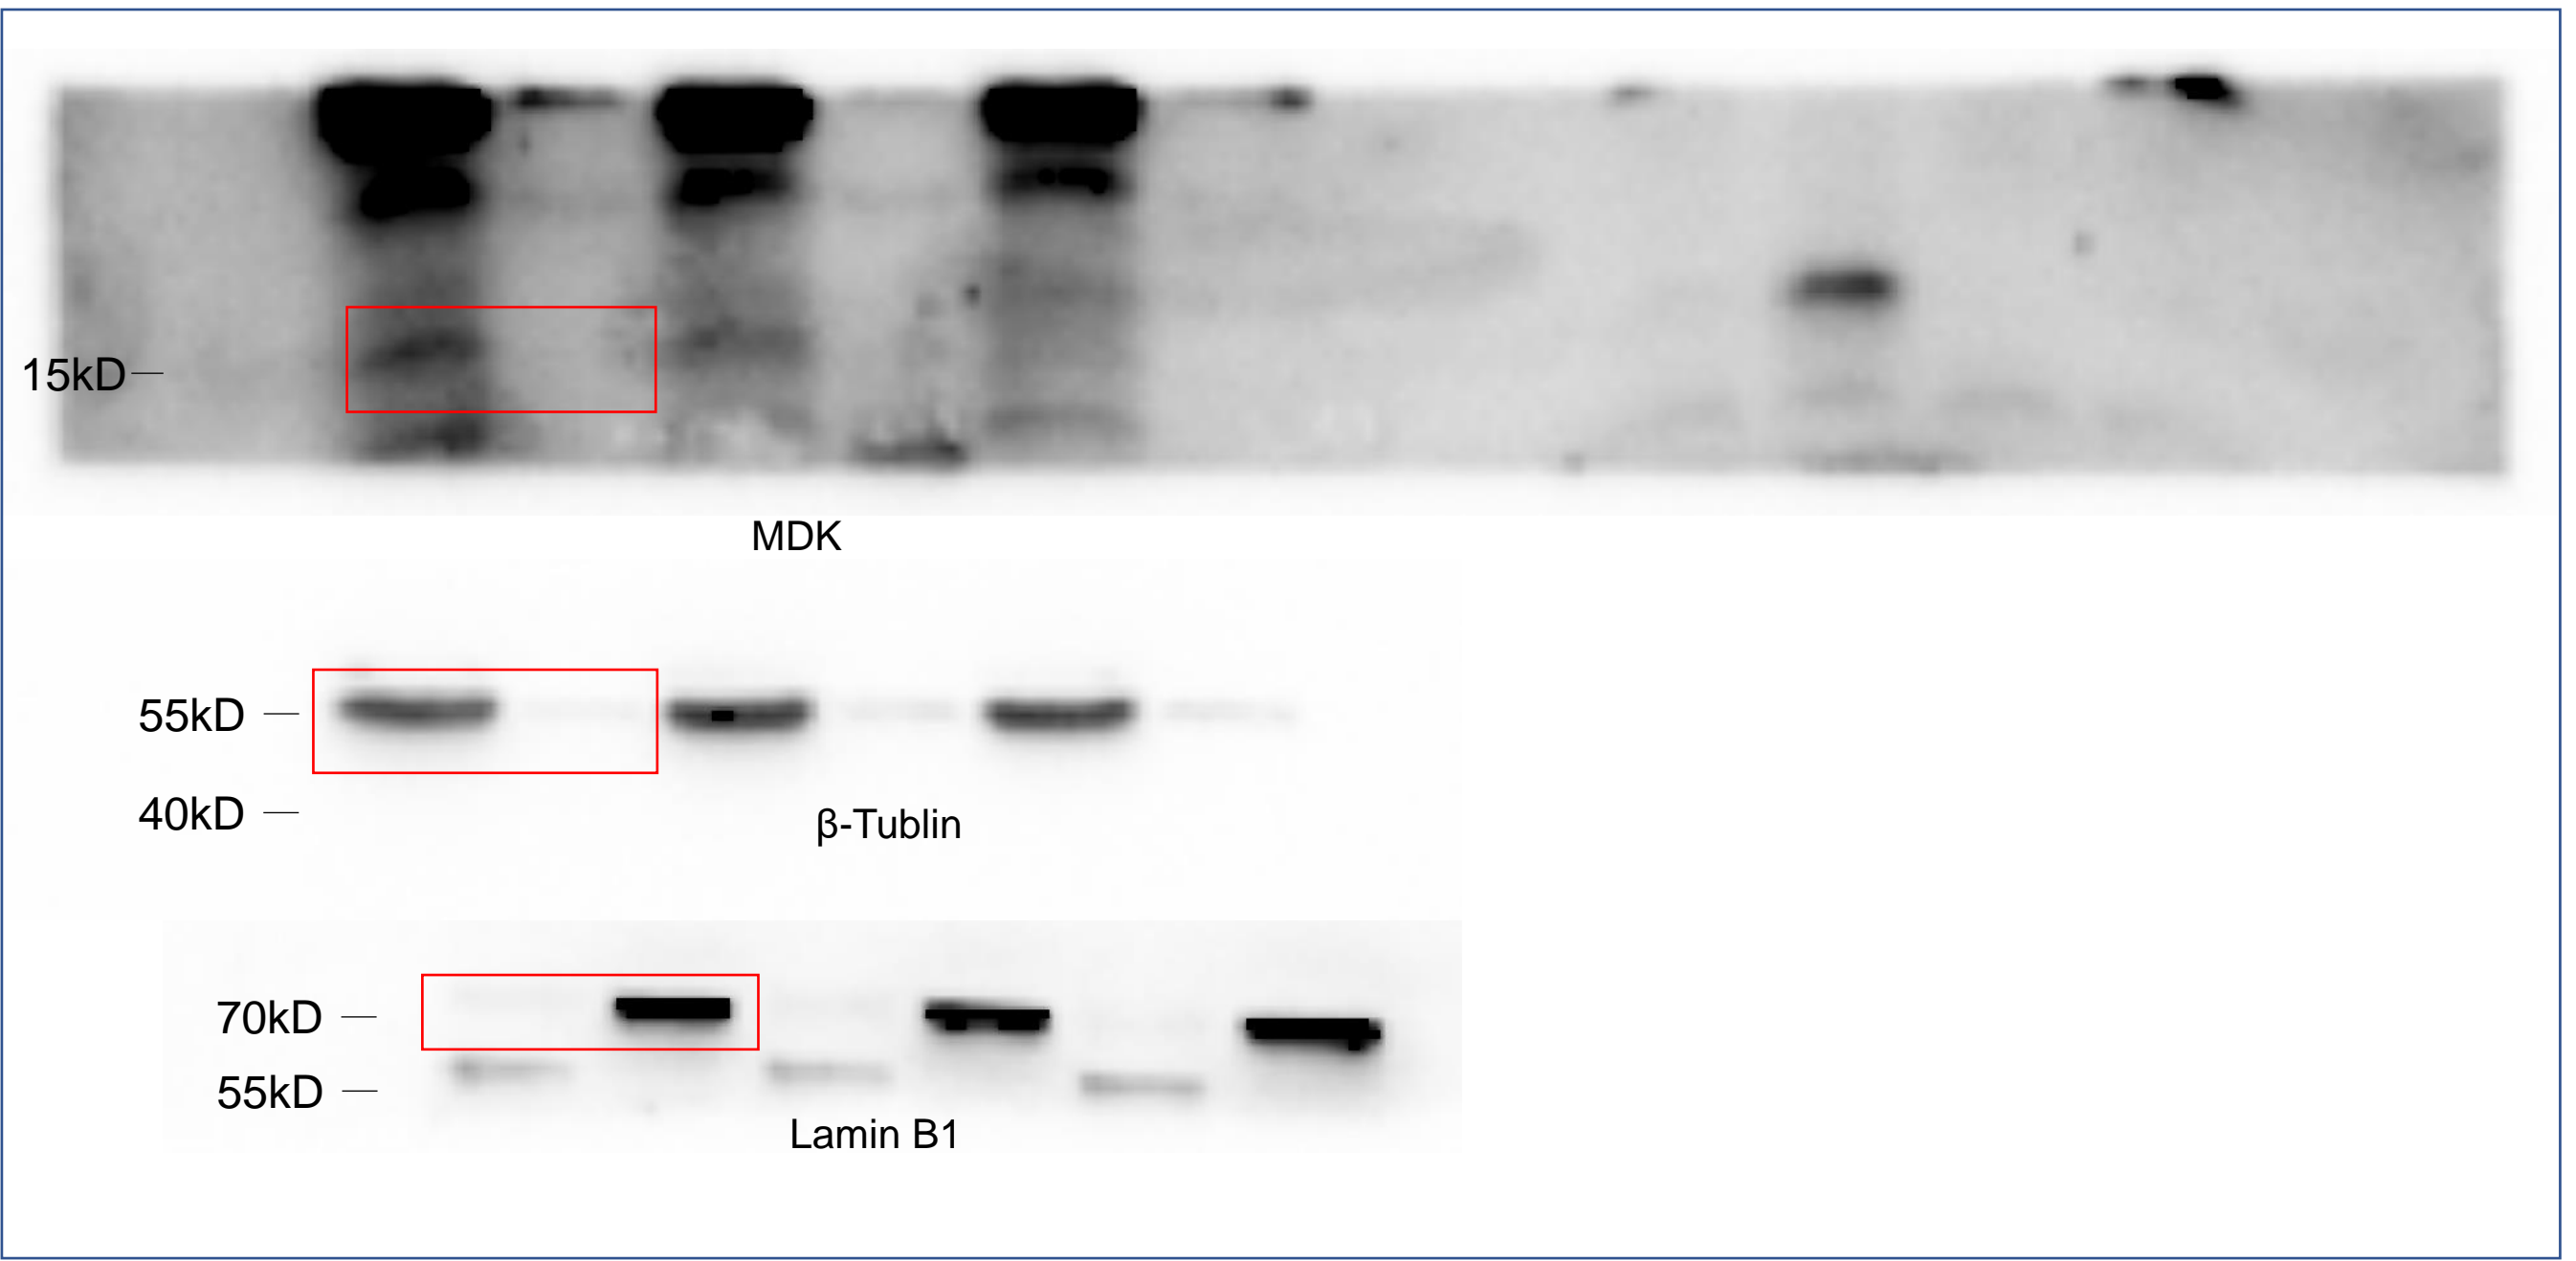

Supplemental Figure 1E

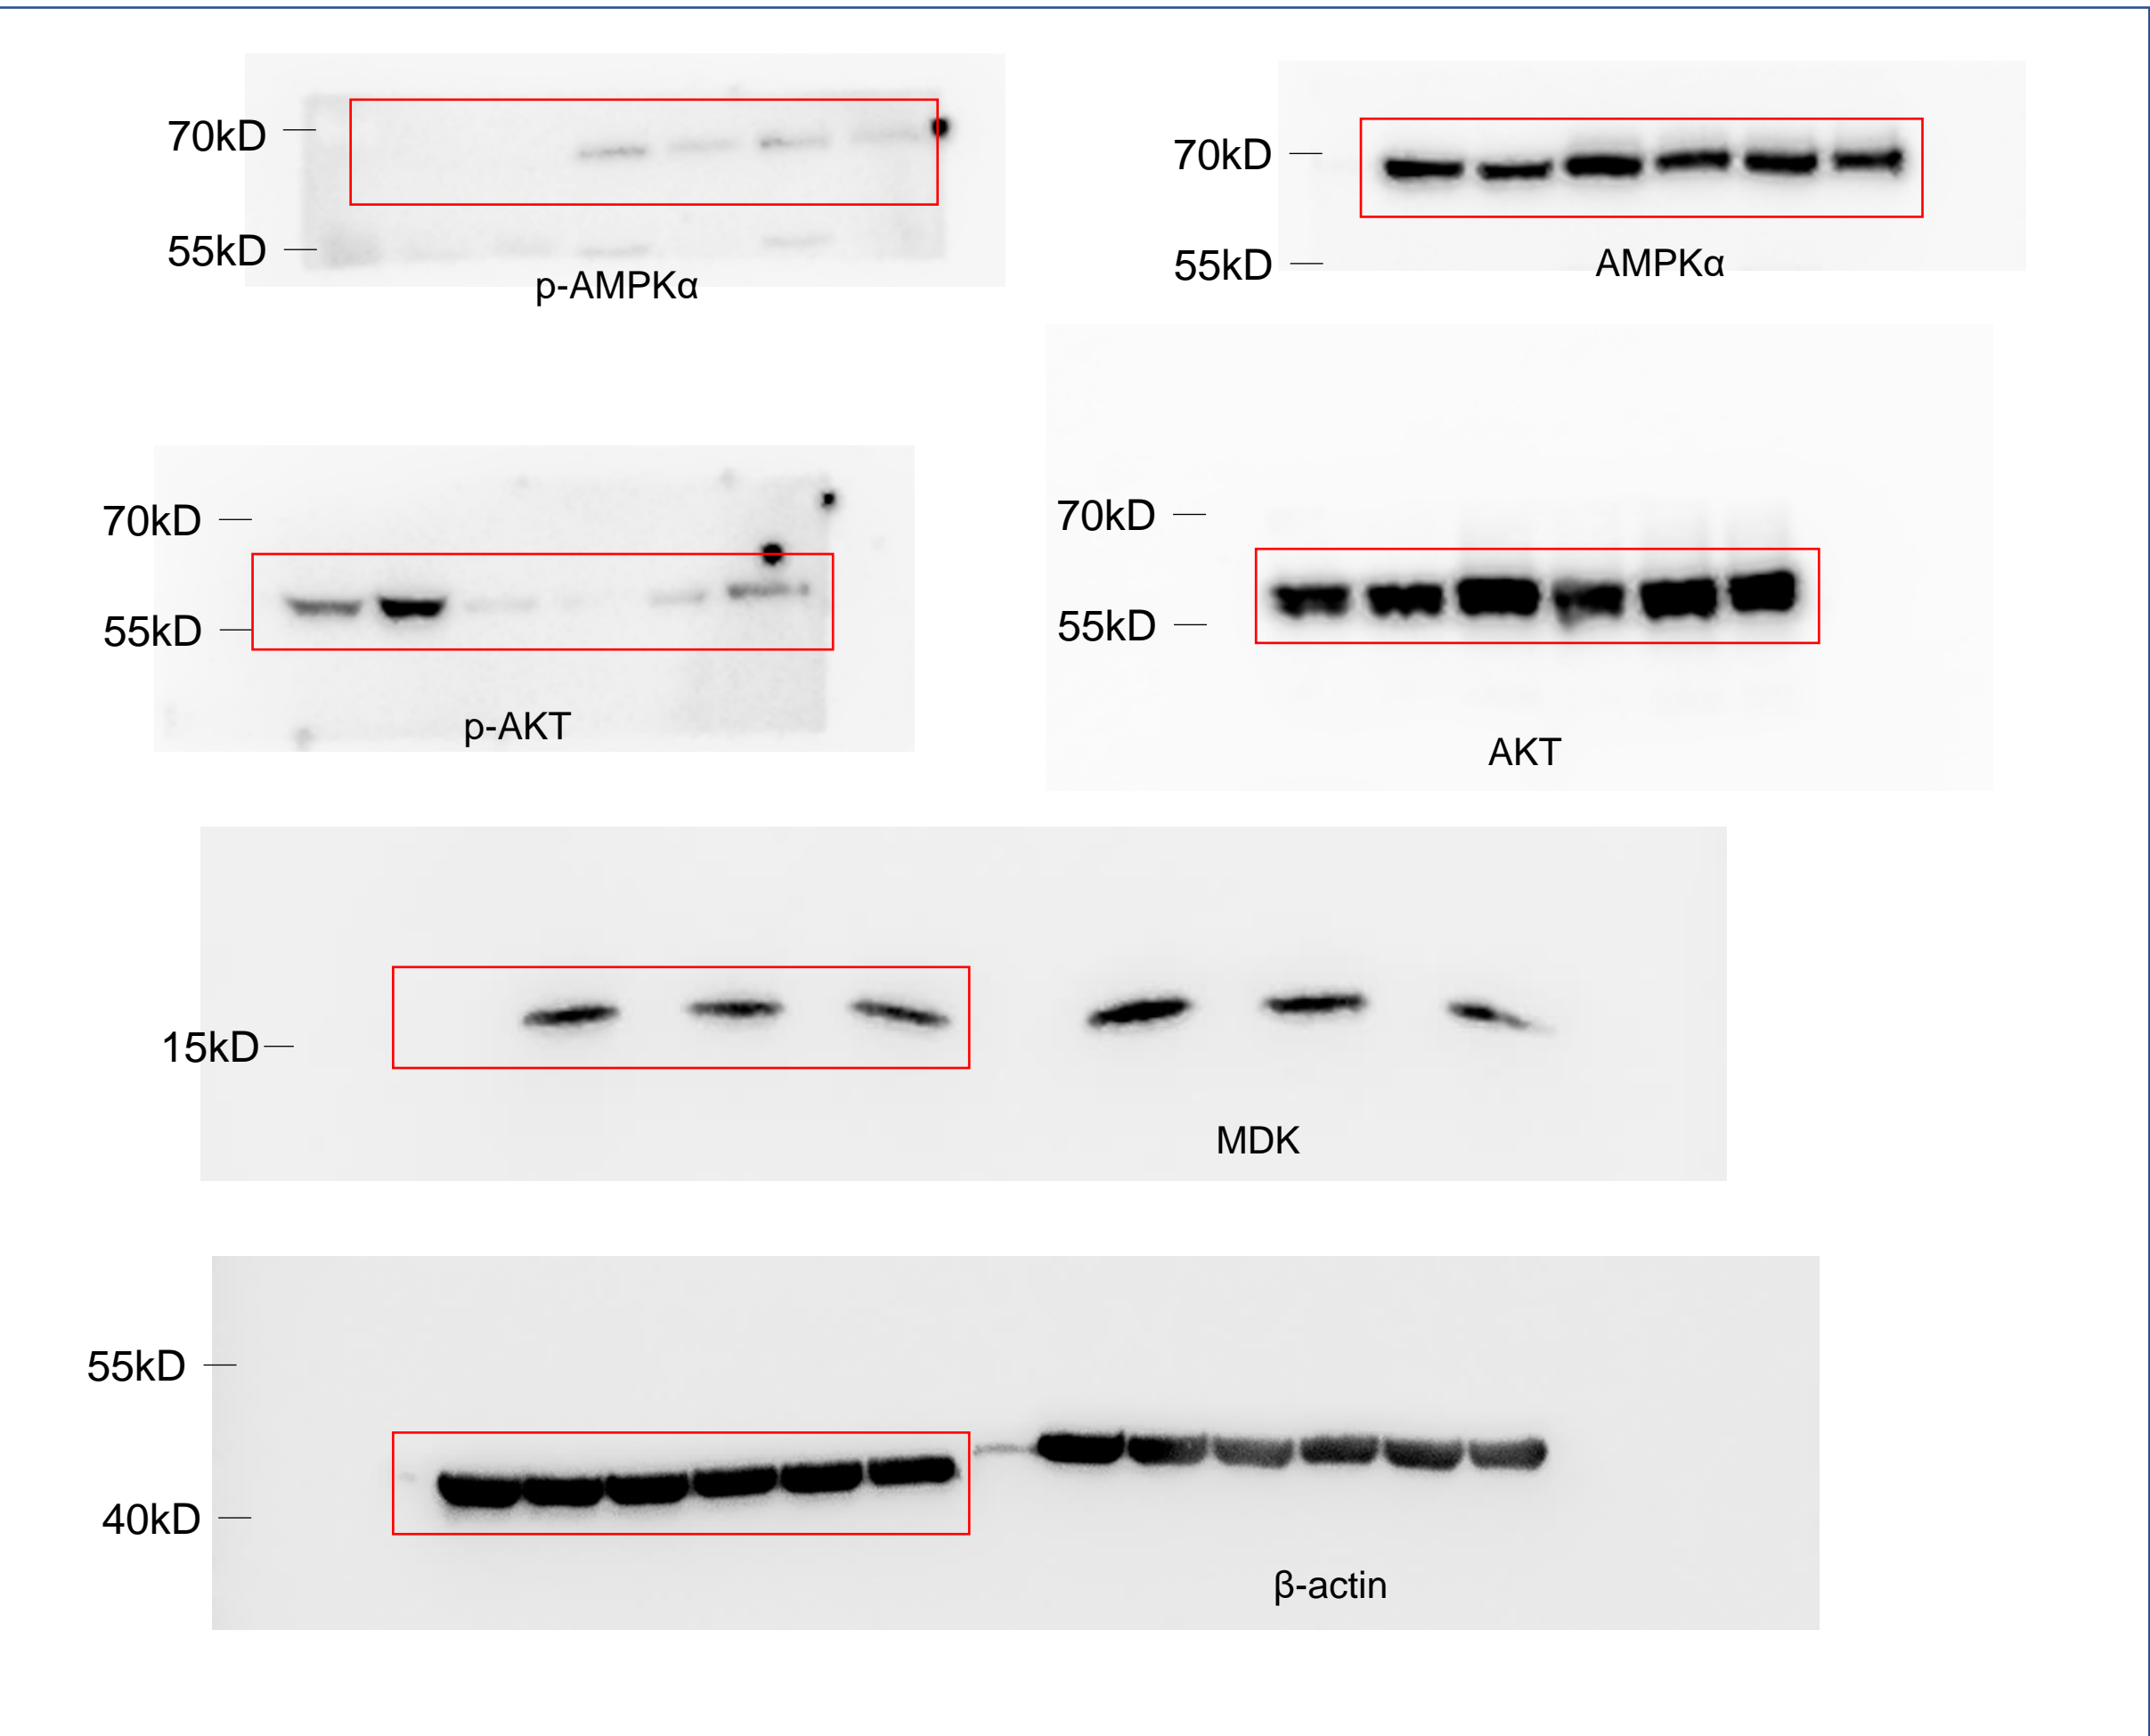



Supplemental Figure 1F

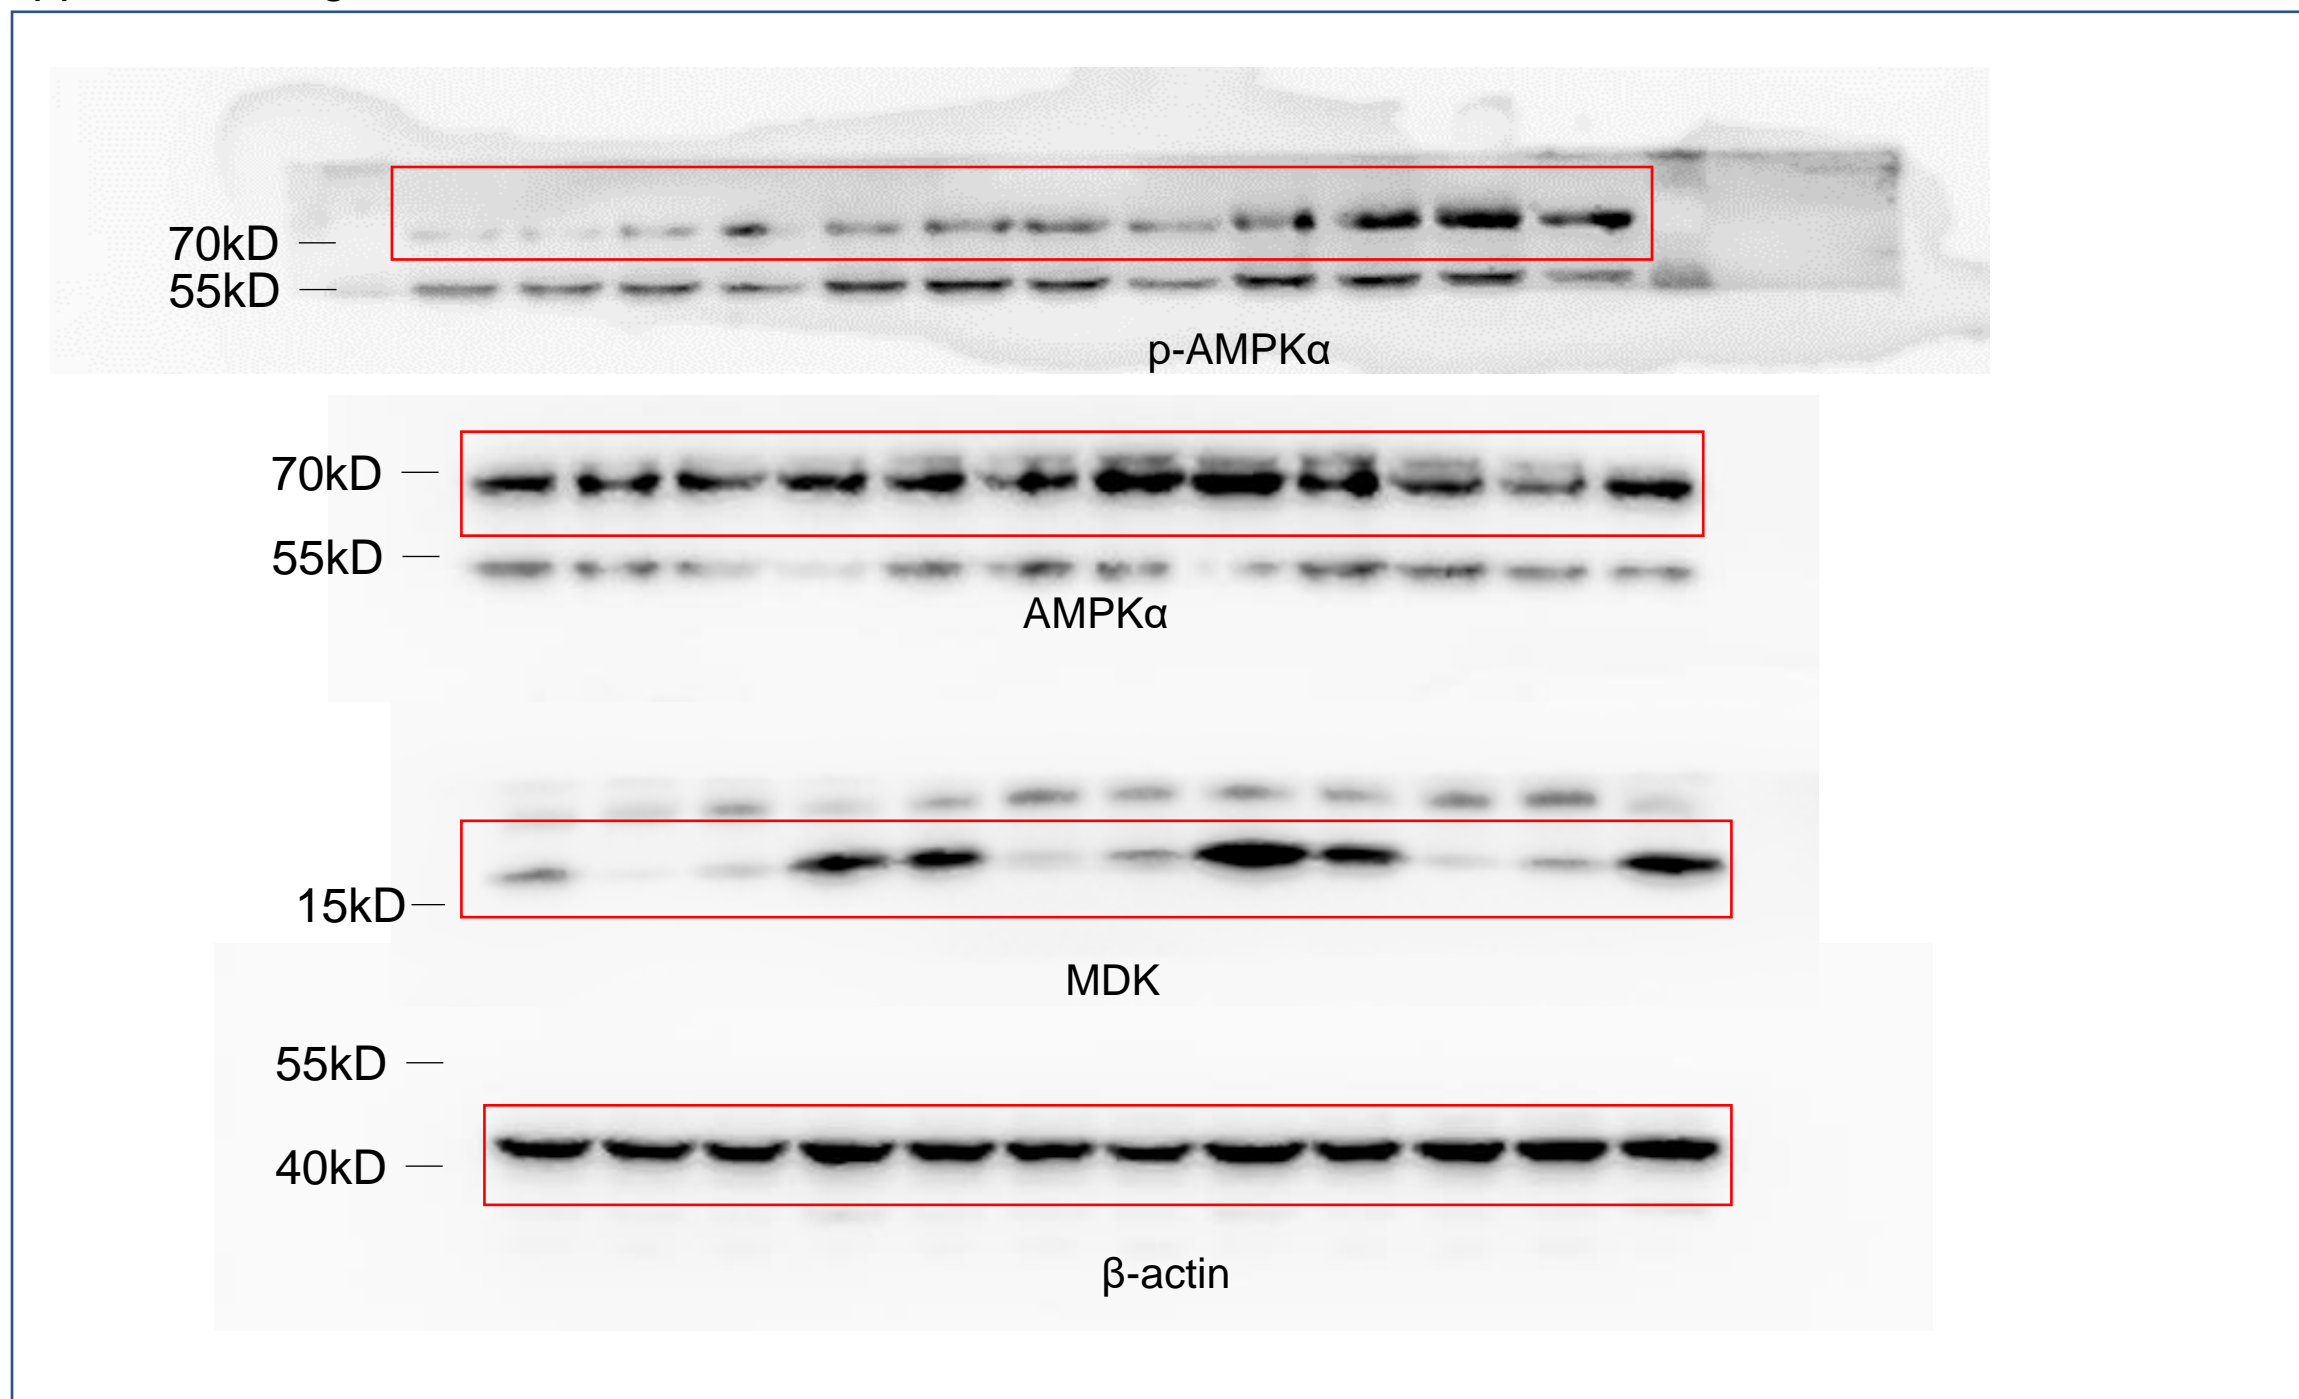

Supplemental Figure 1G

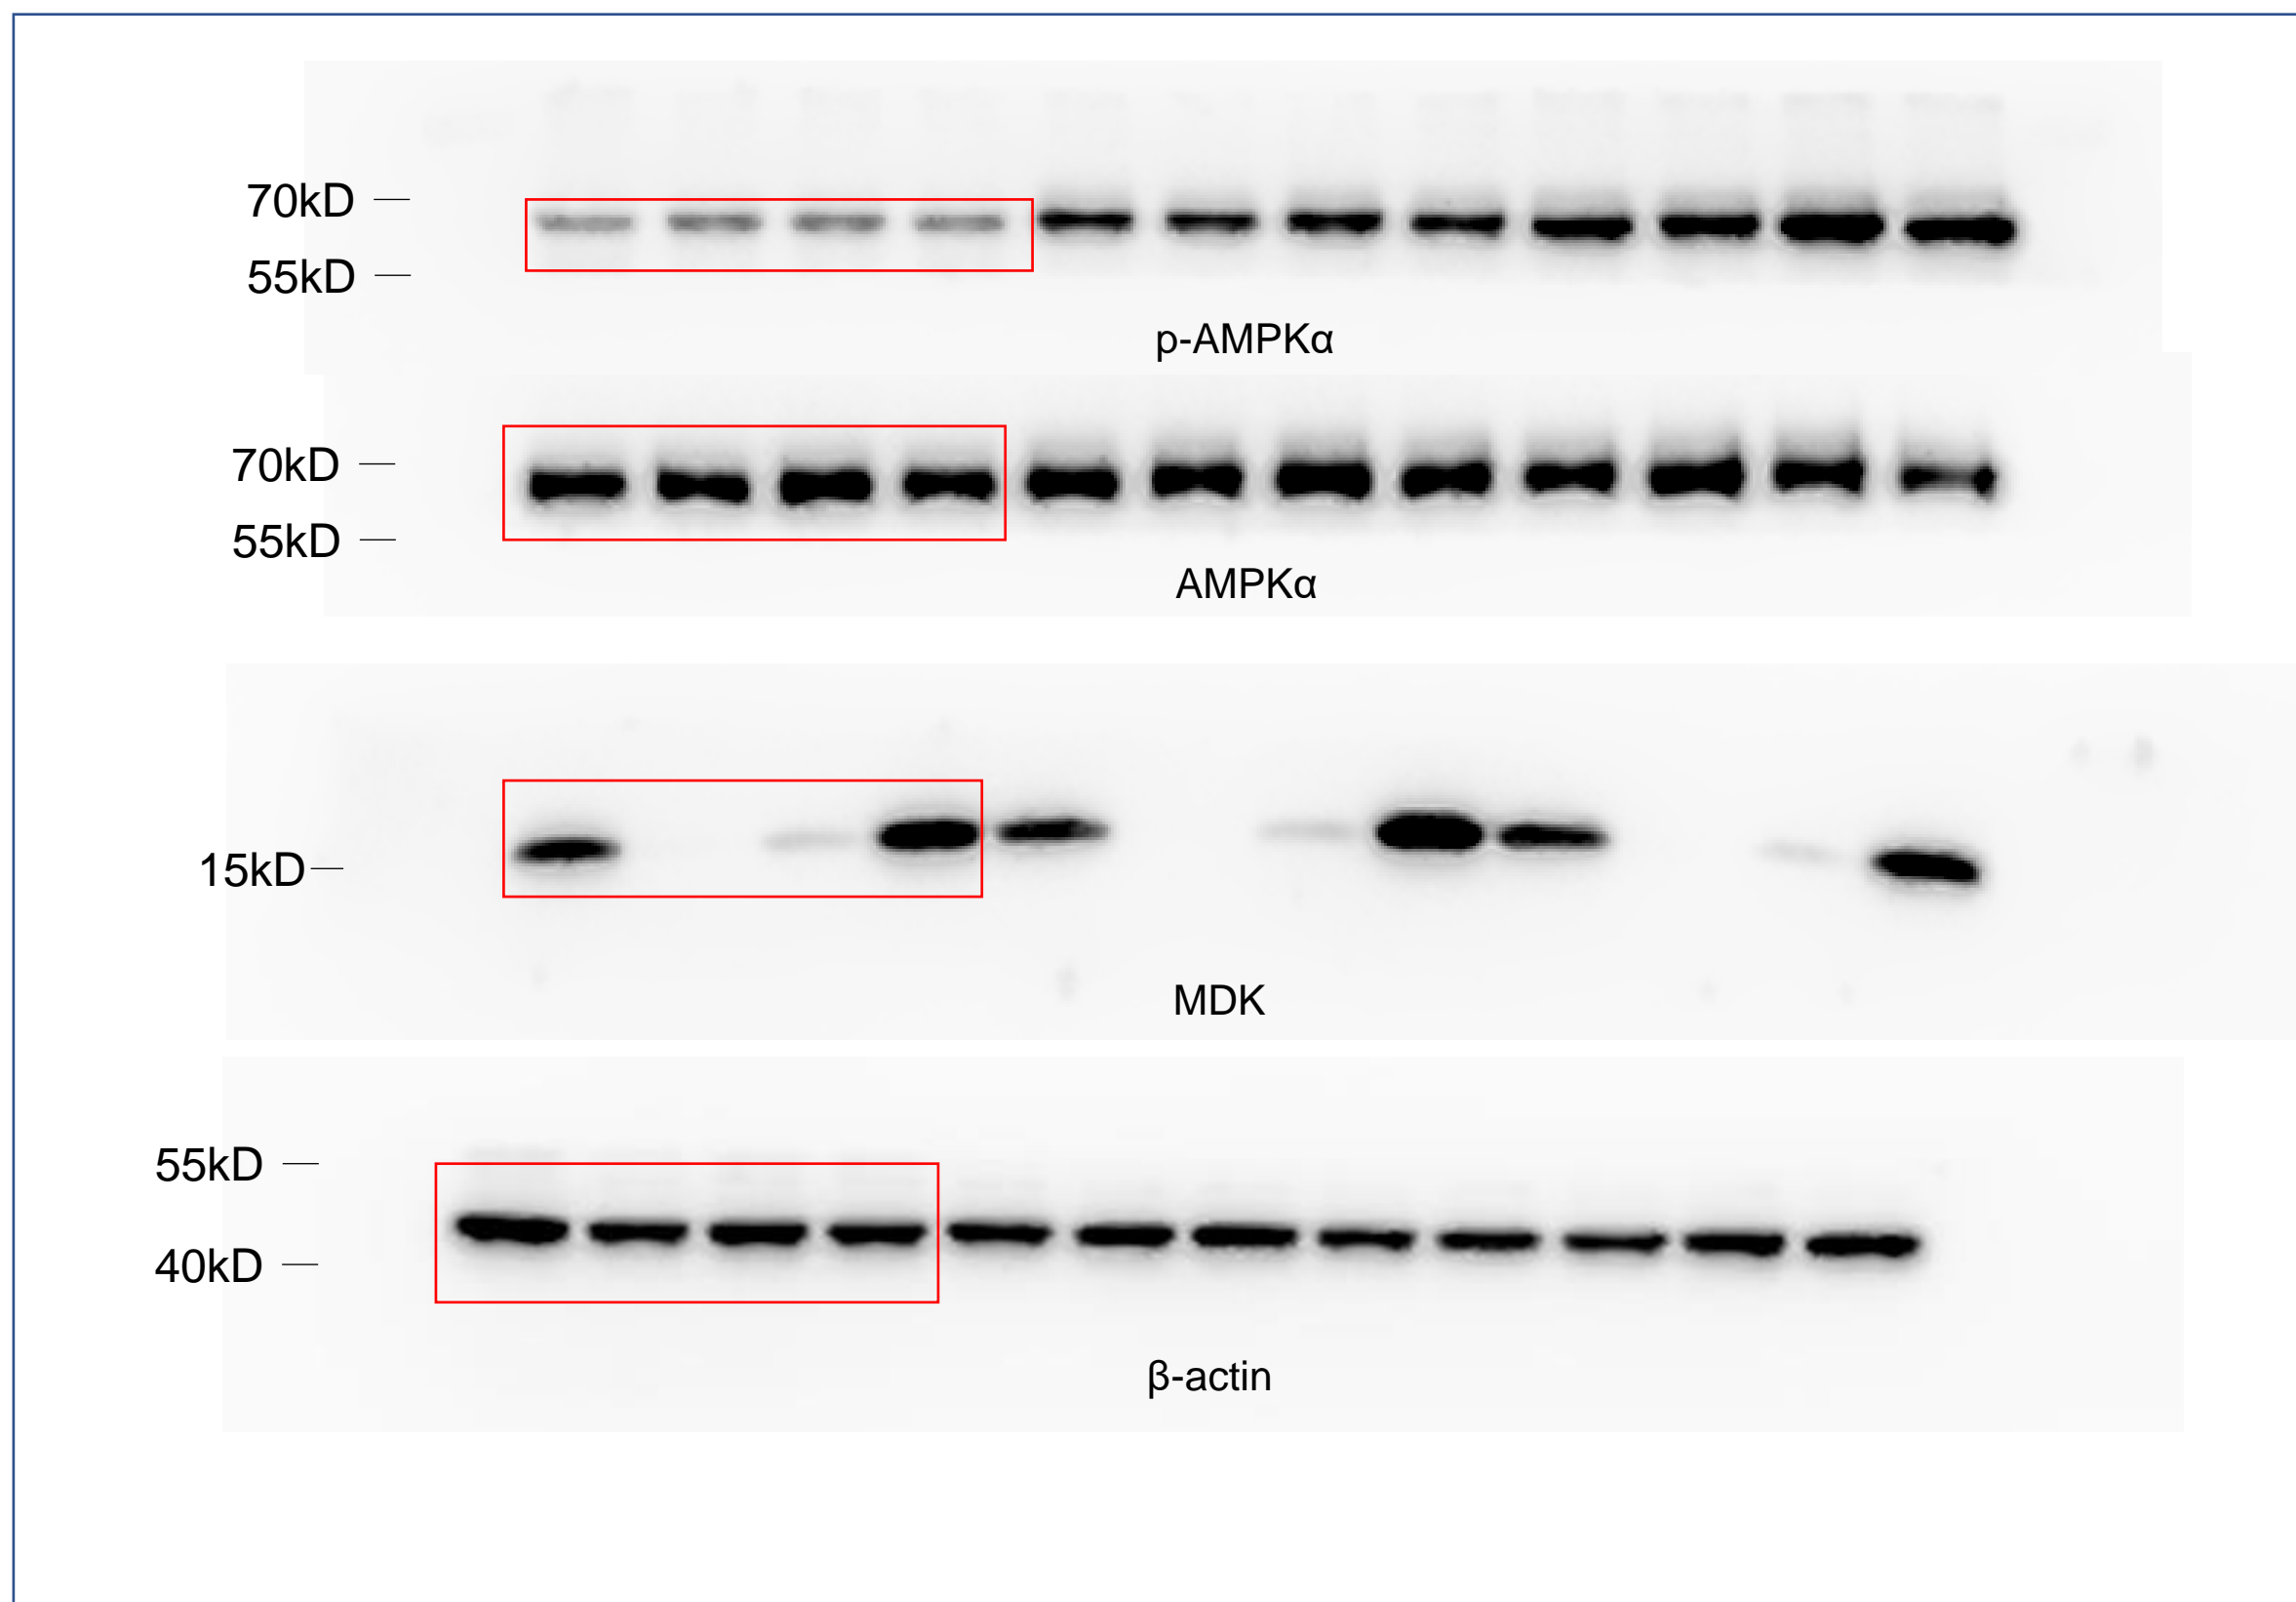

Supplemental Figure 1H

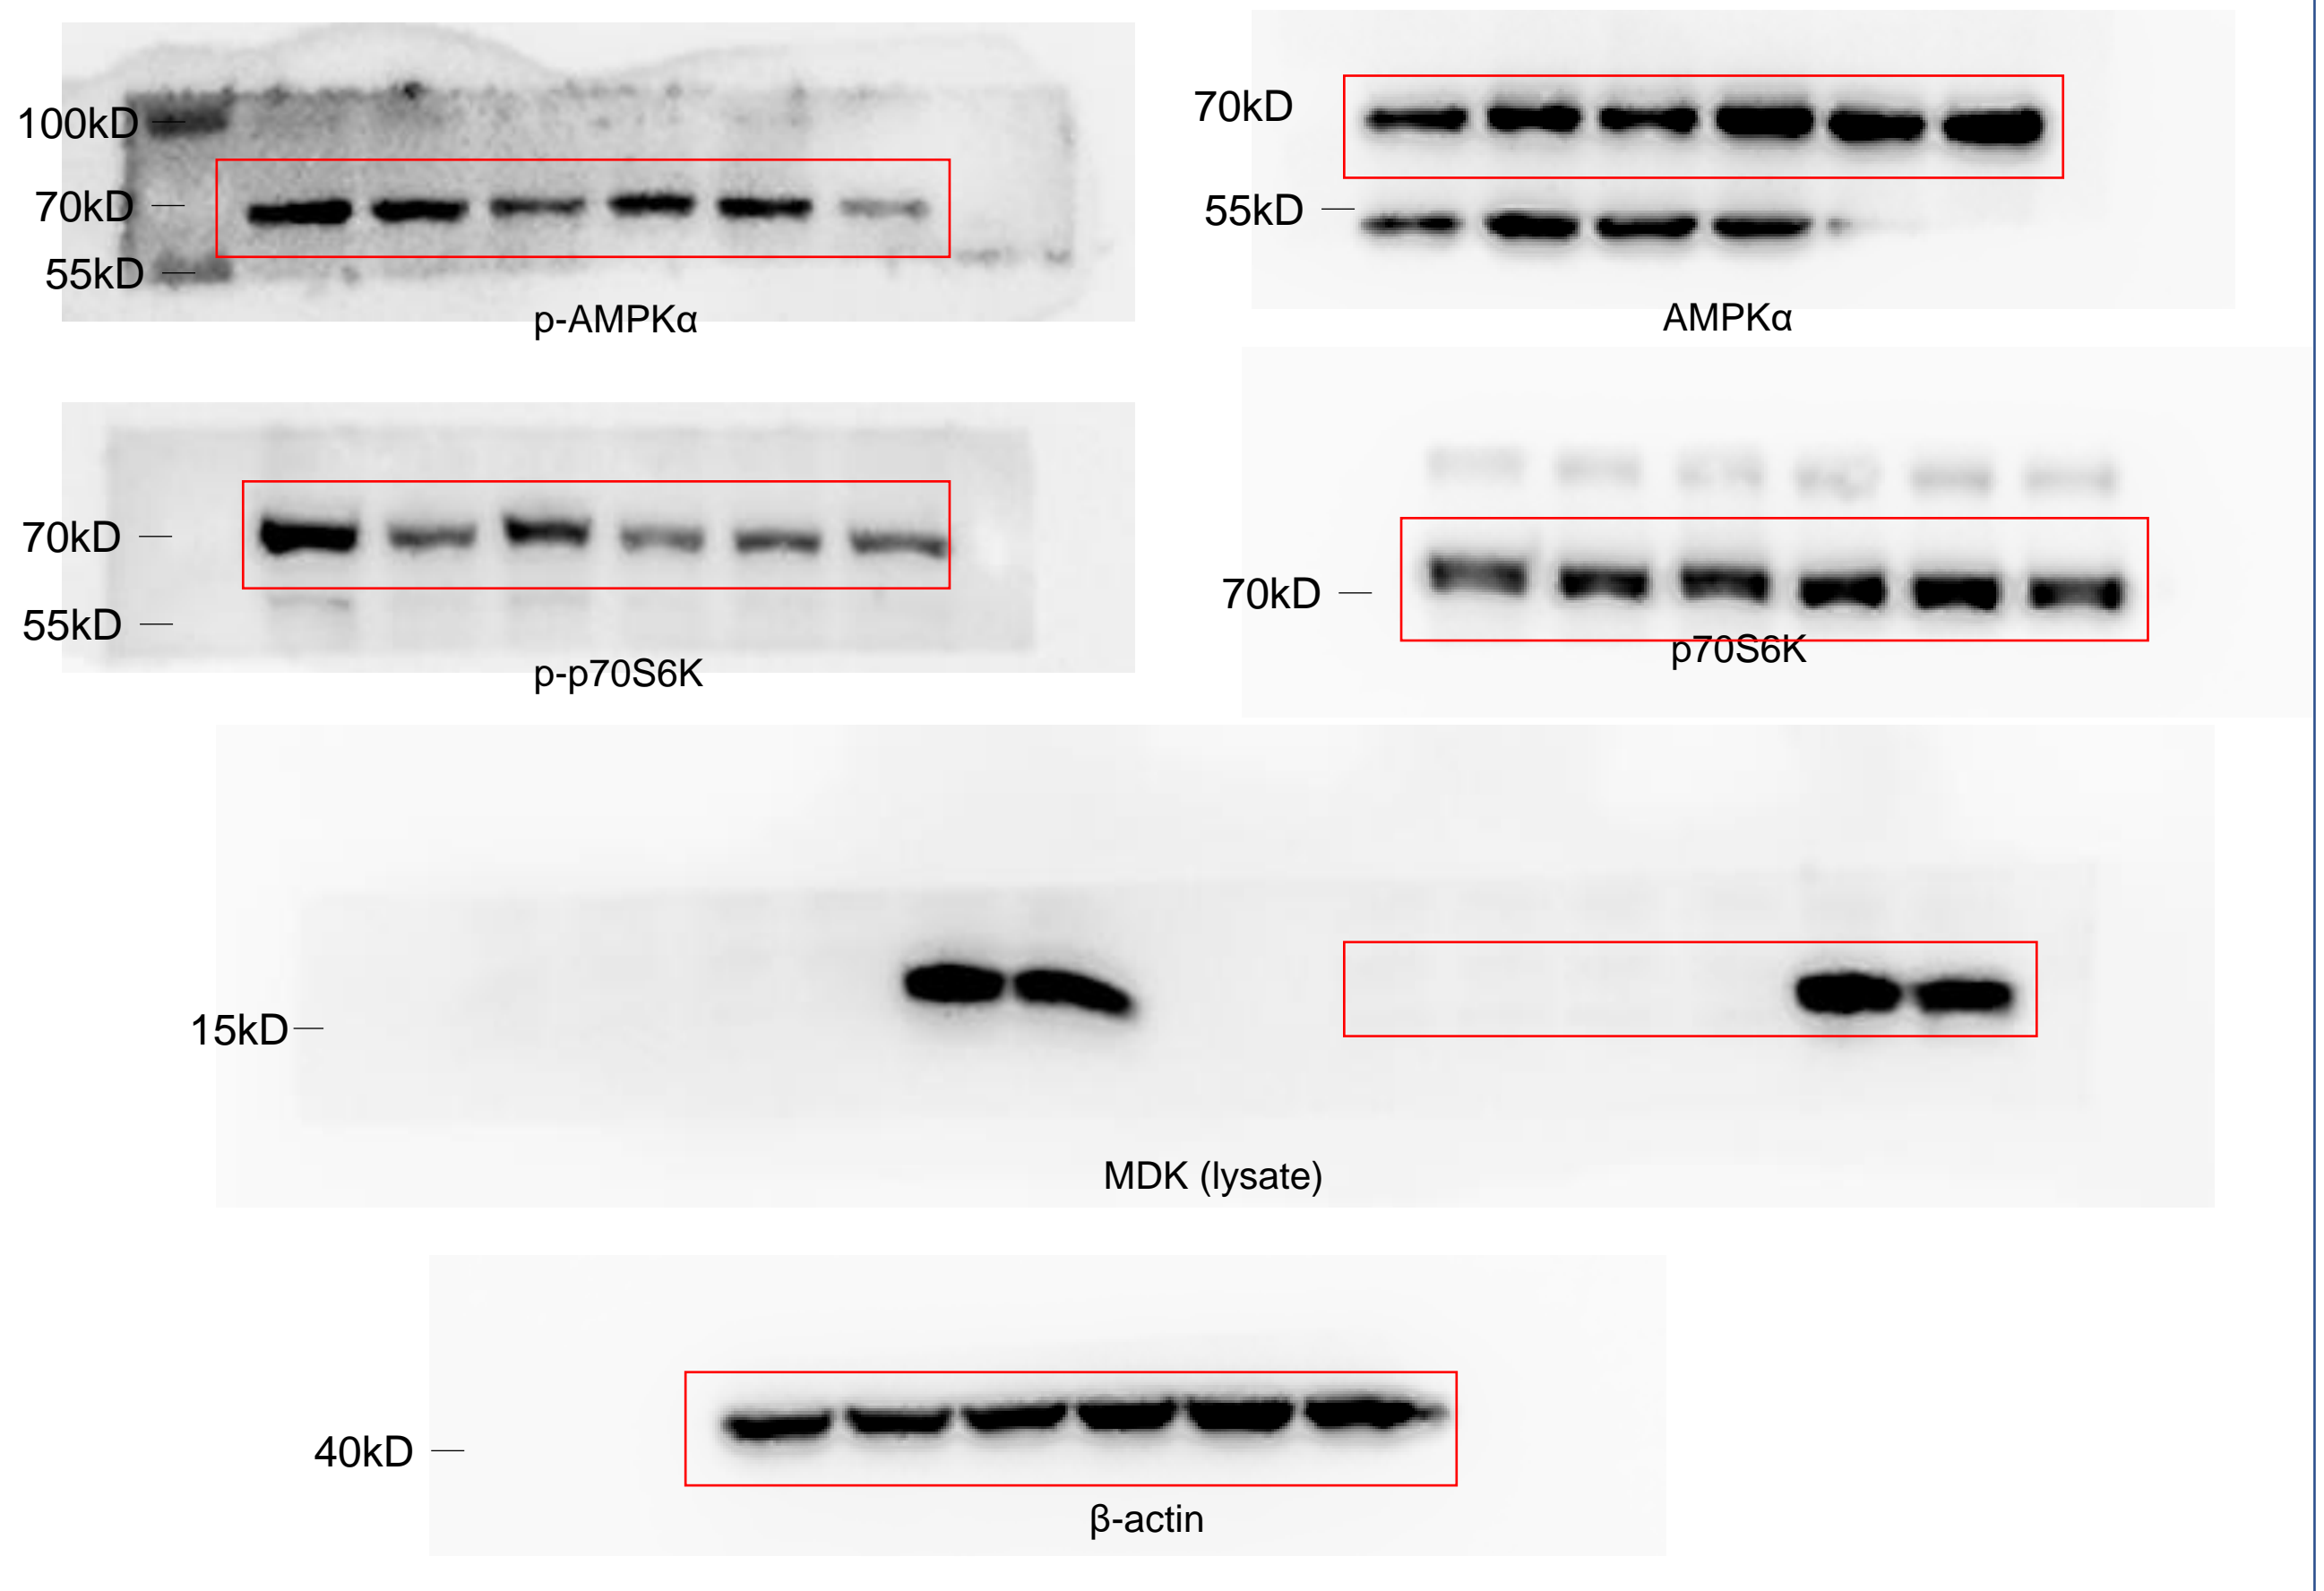

Supplemental Fig.1I

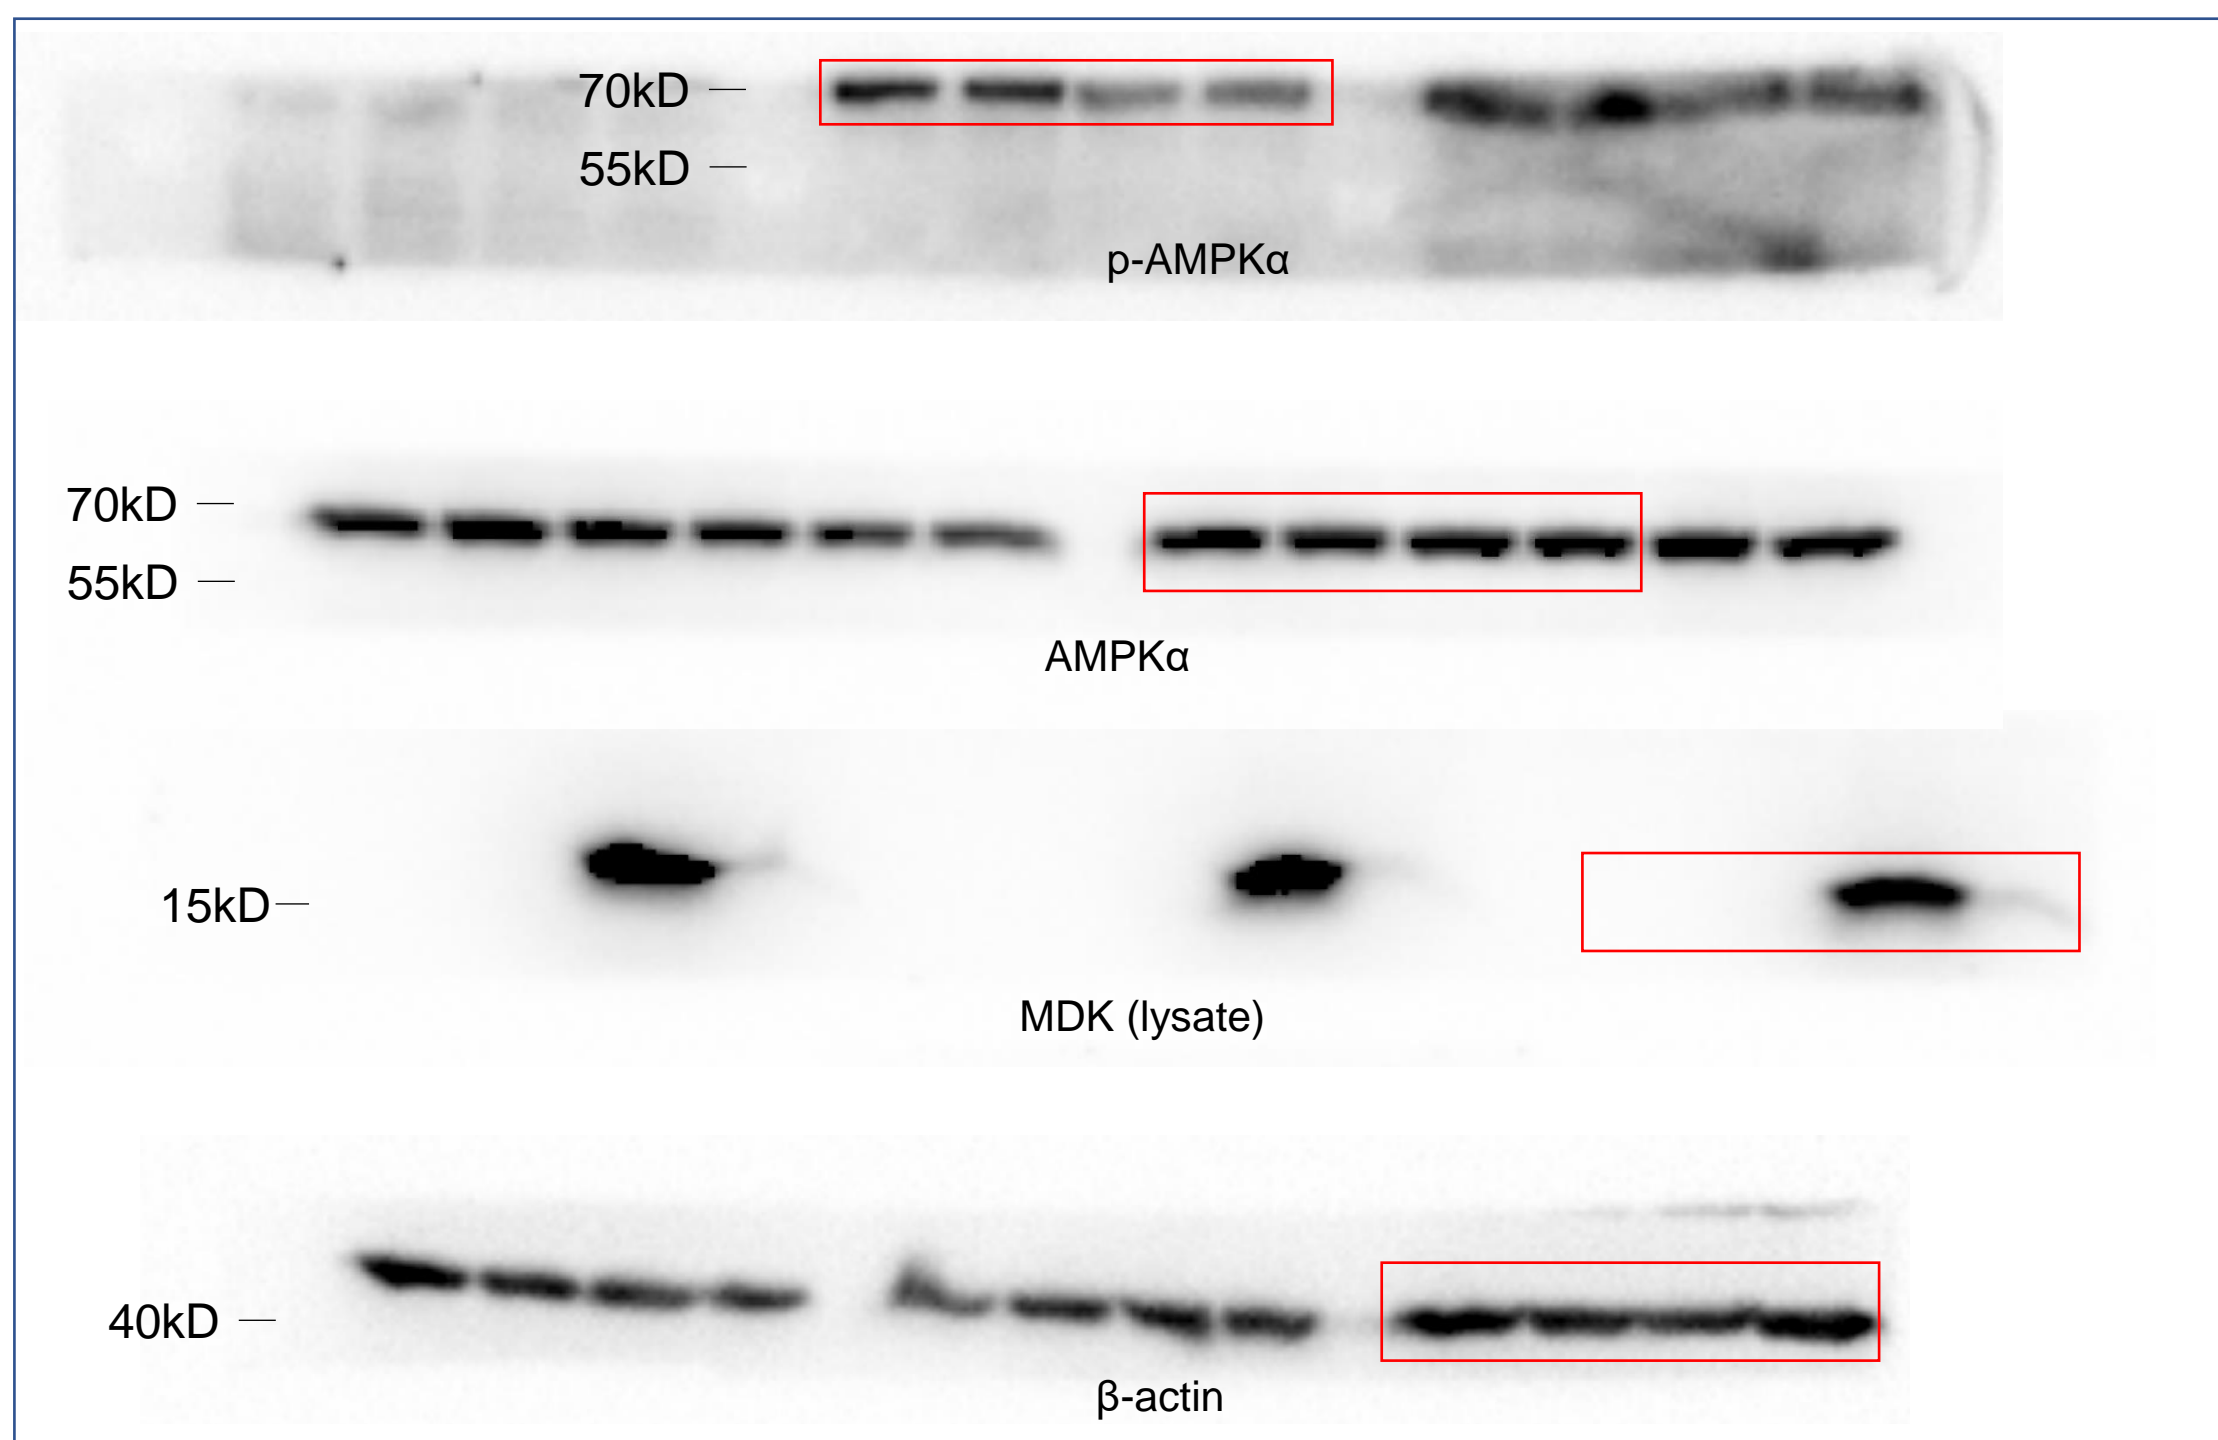

Supplemental Figure 2B

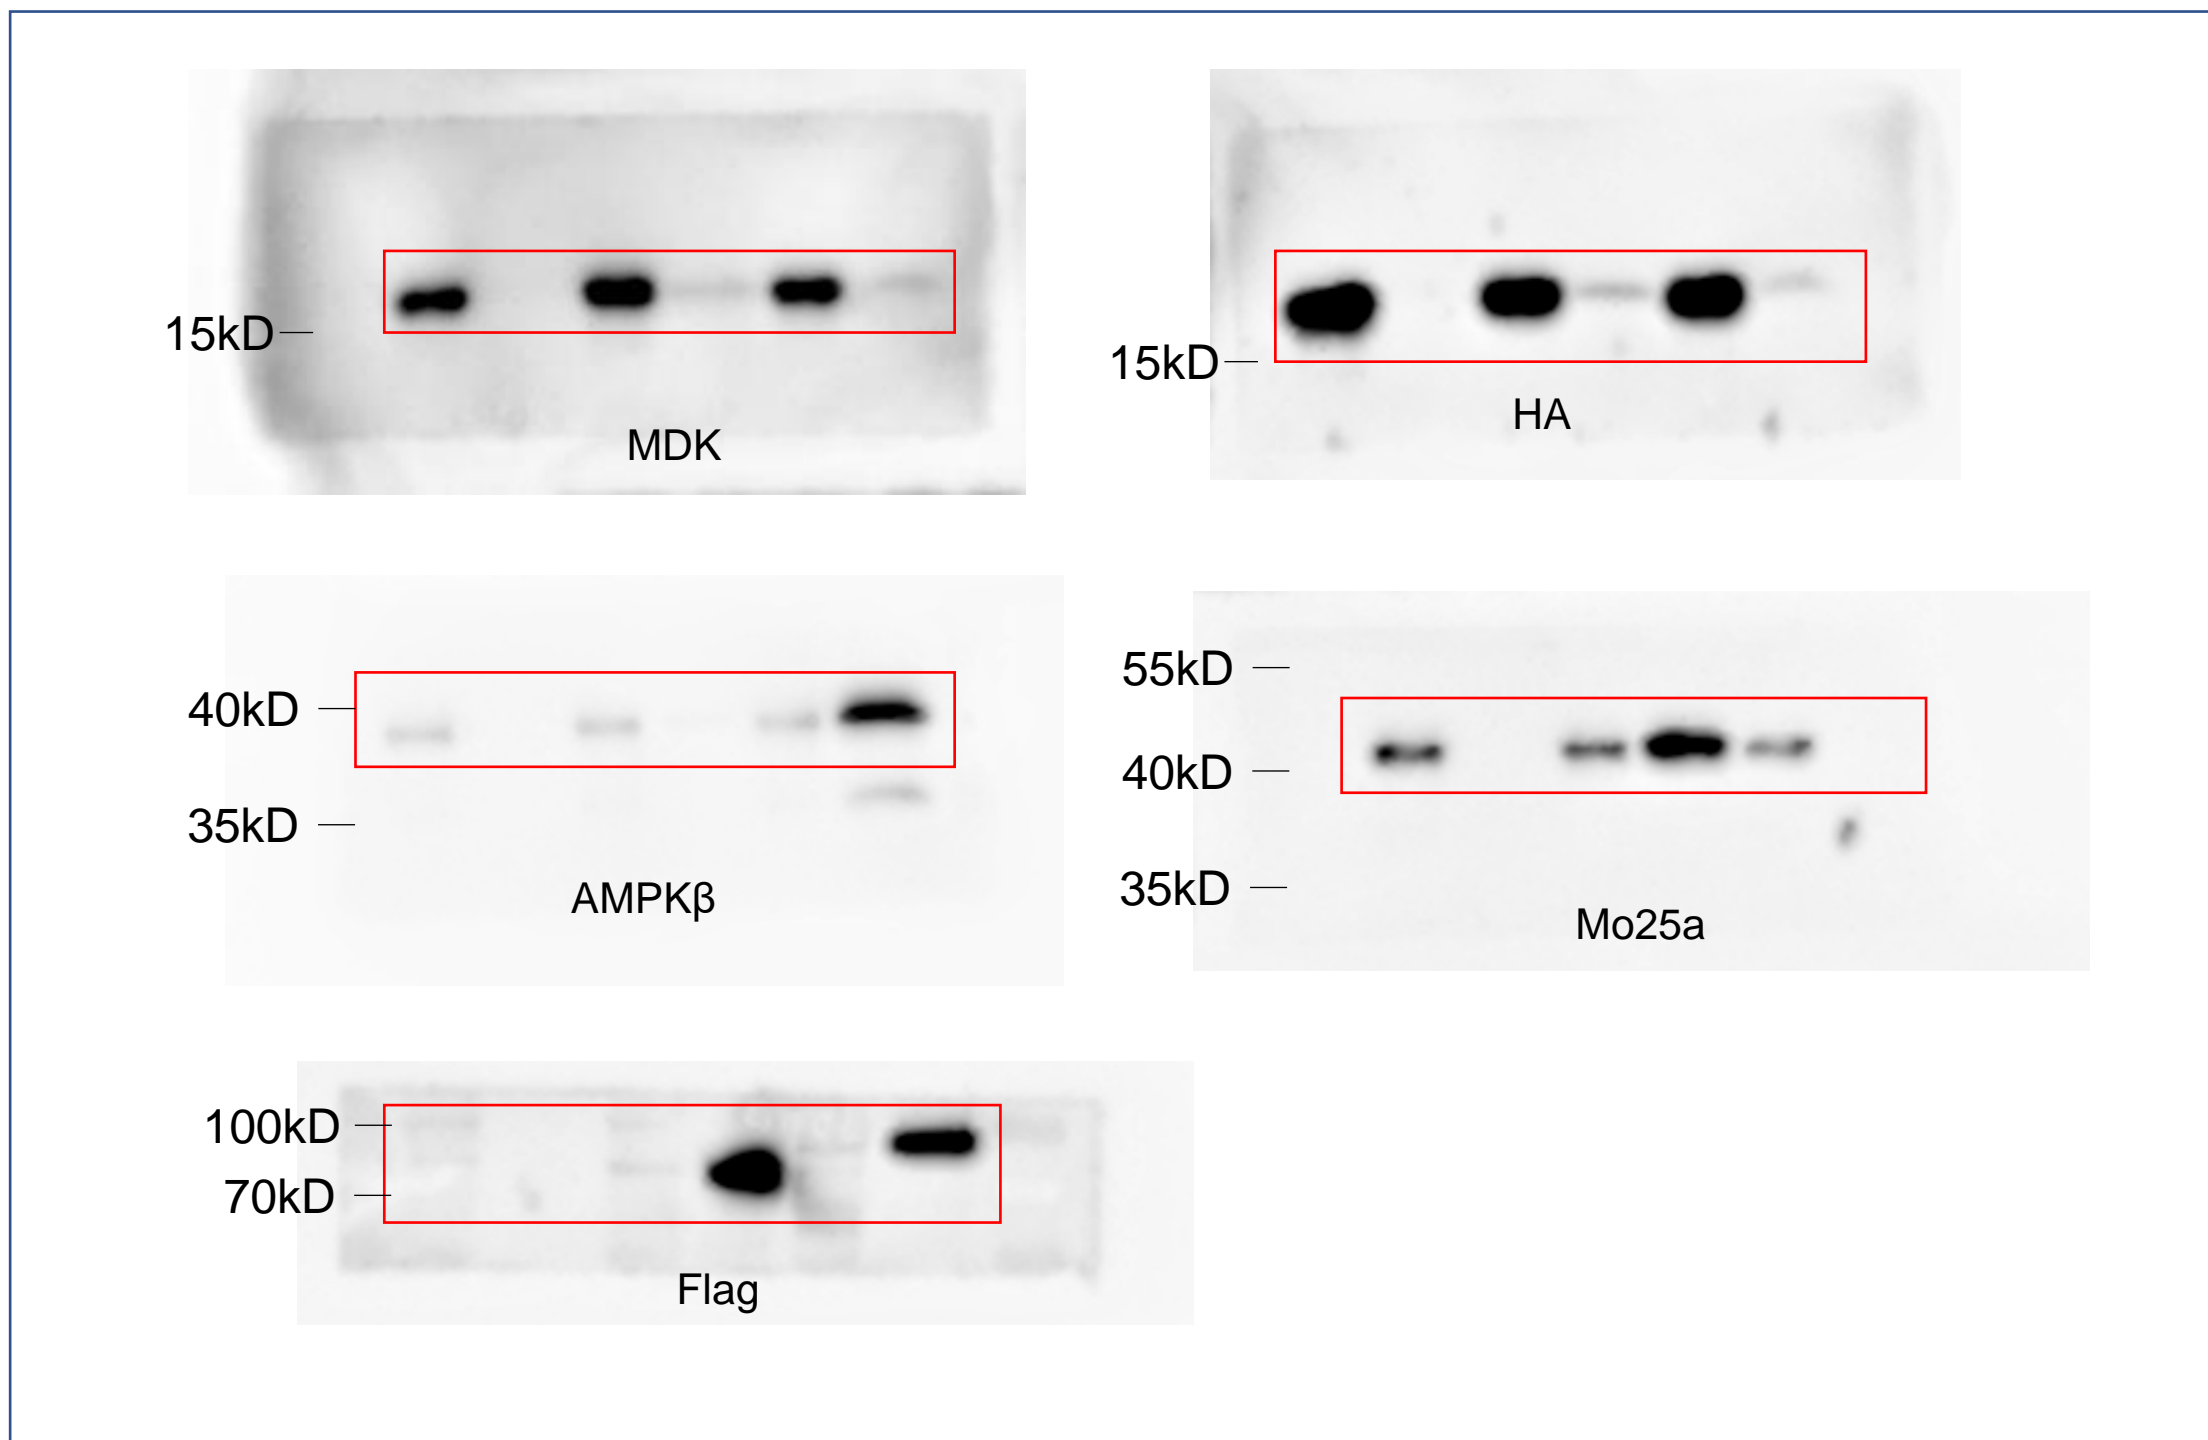

Supplemental Figure 2C

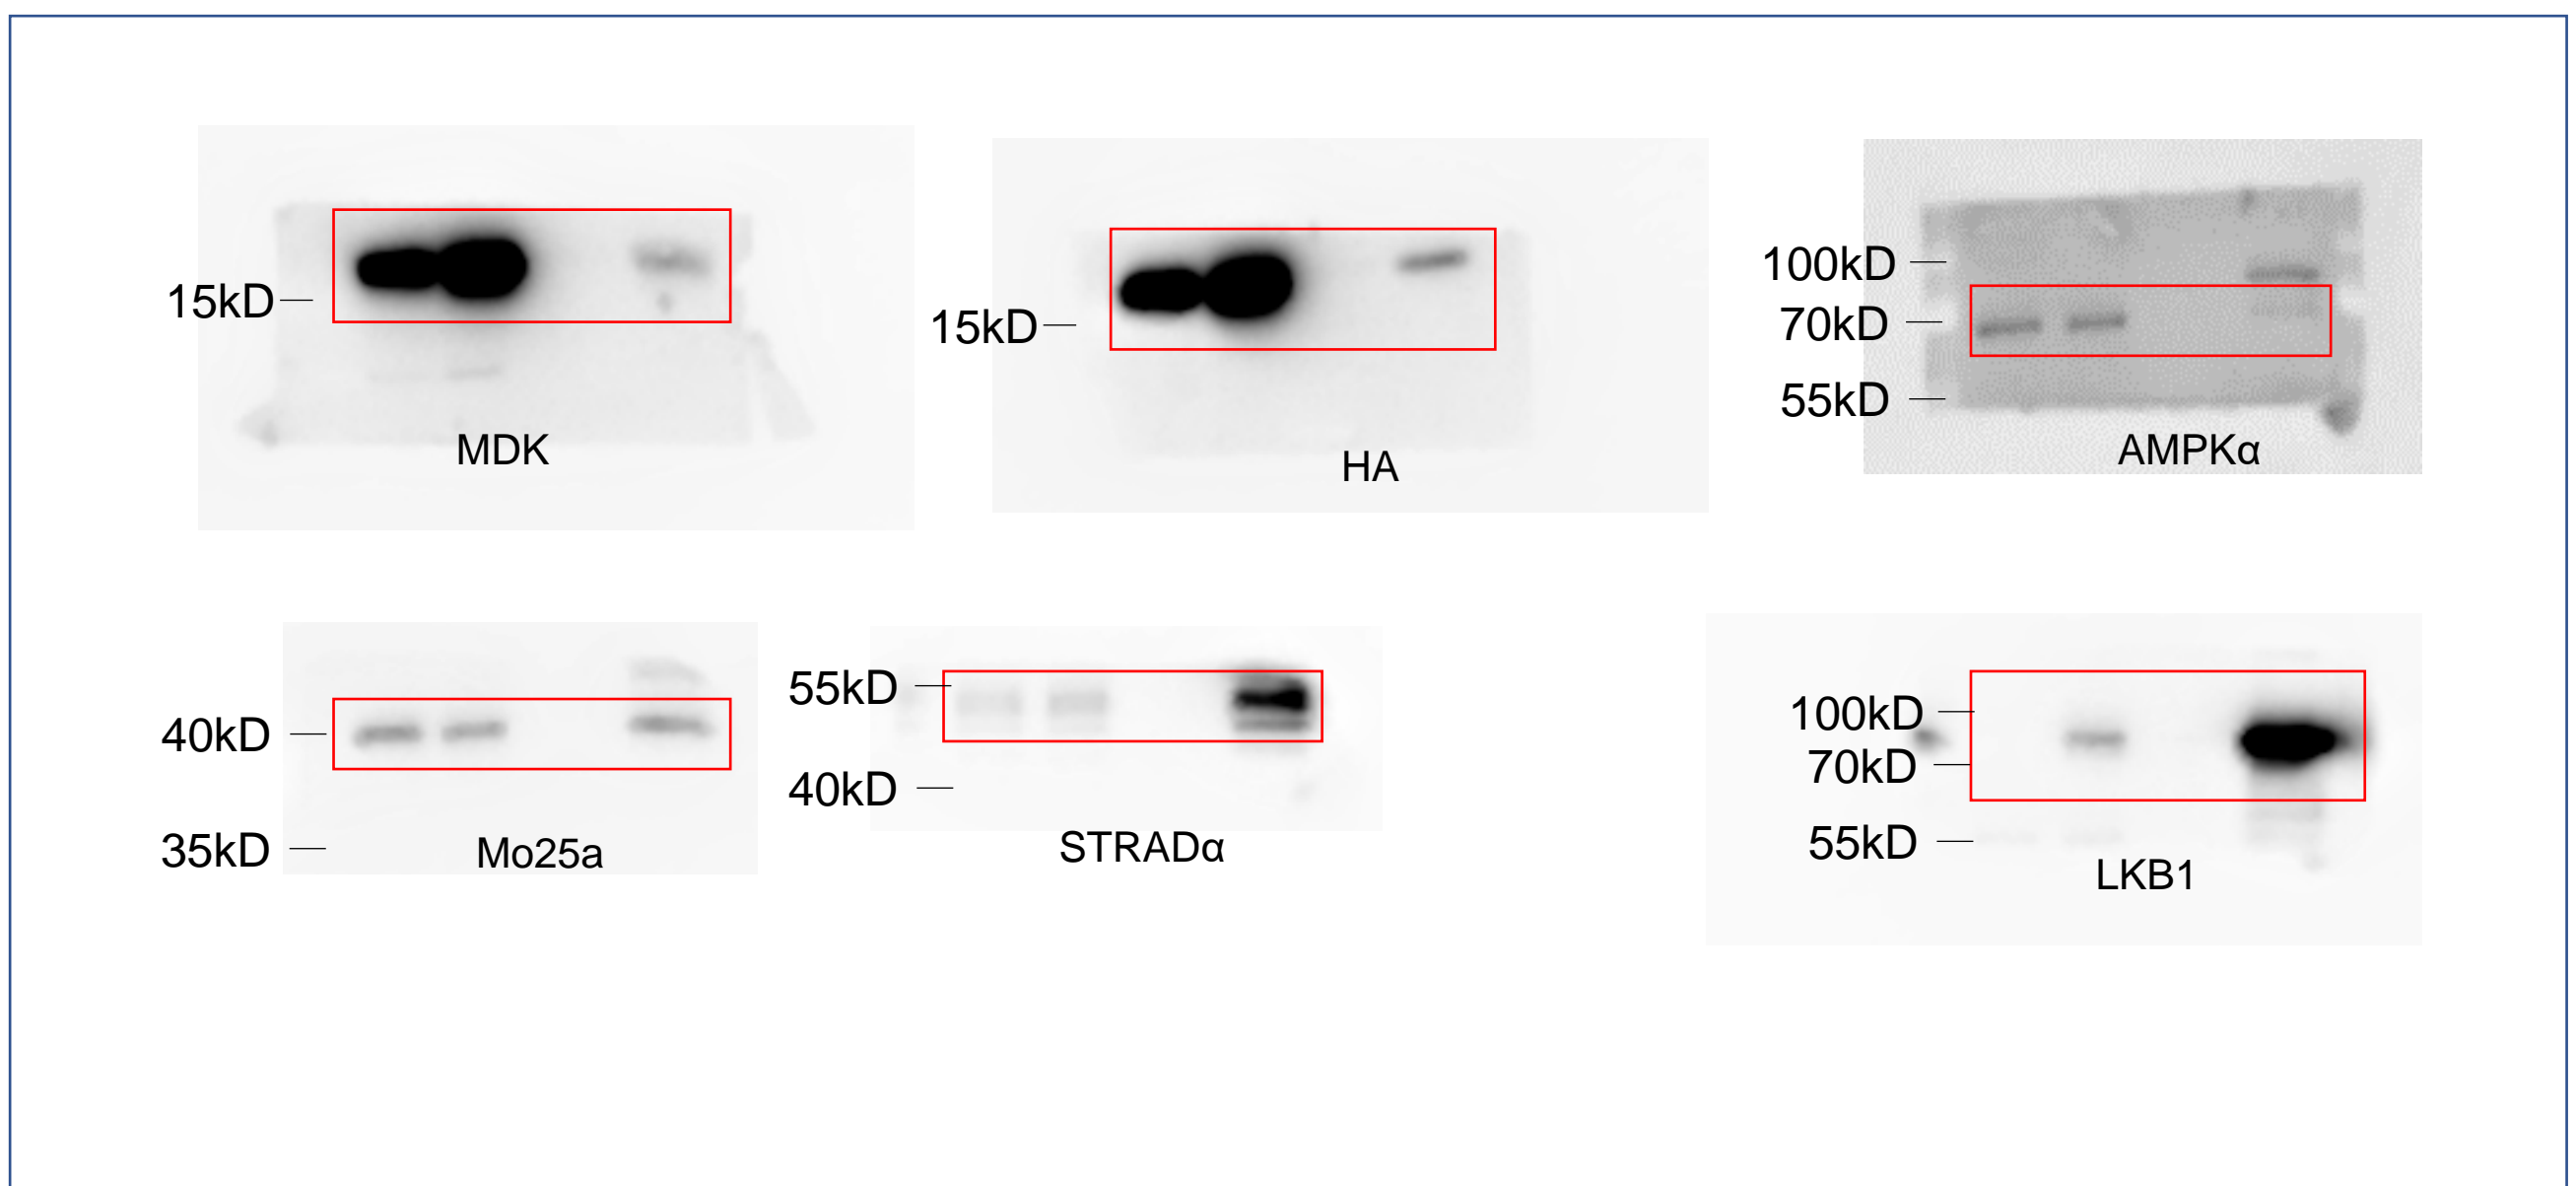

Supplemental Figure 2D

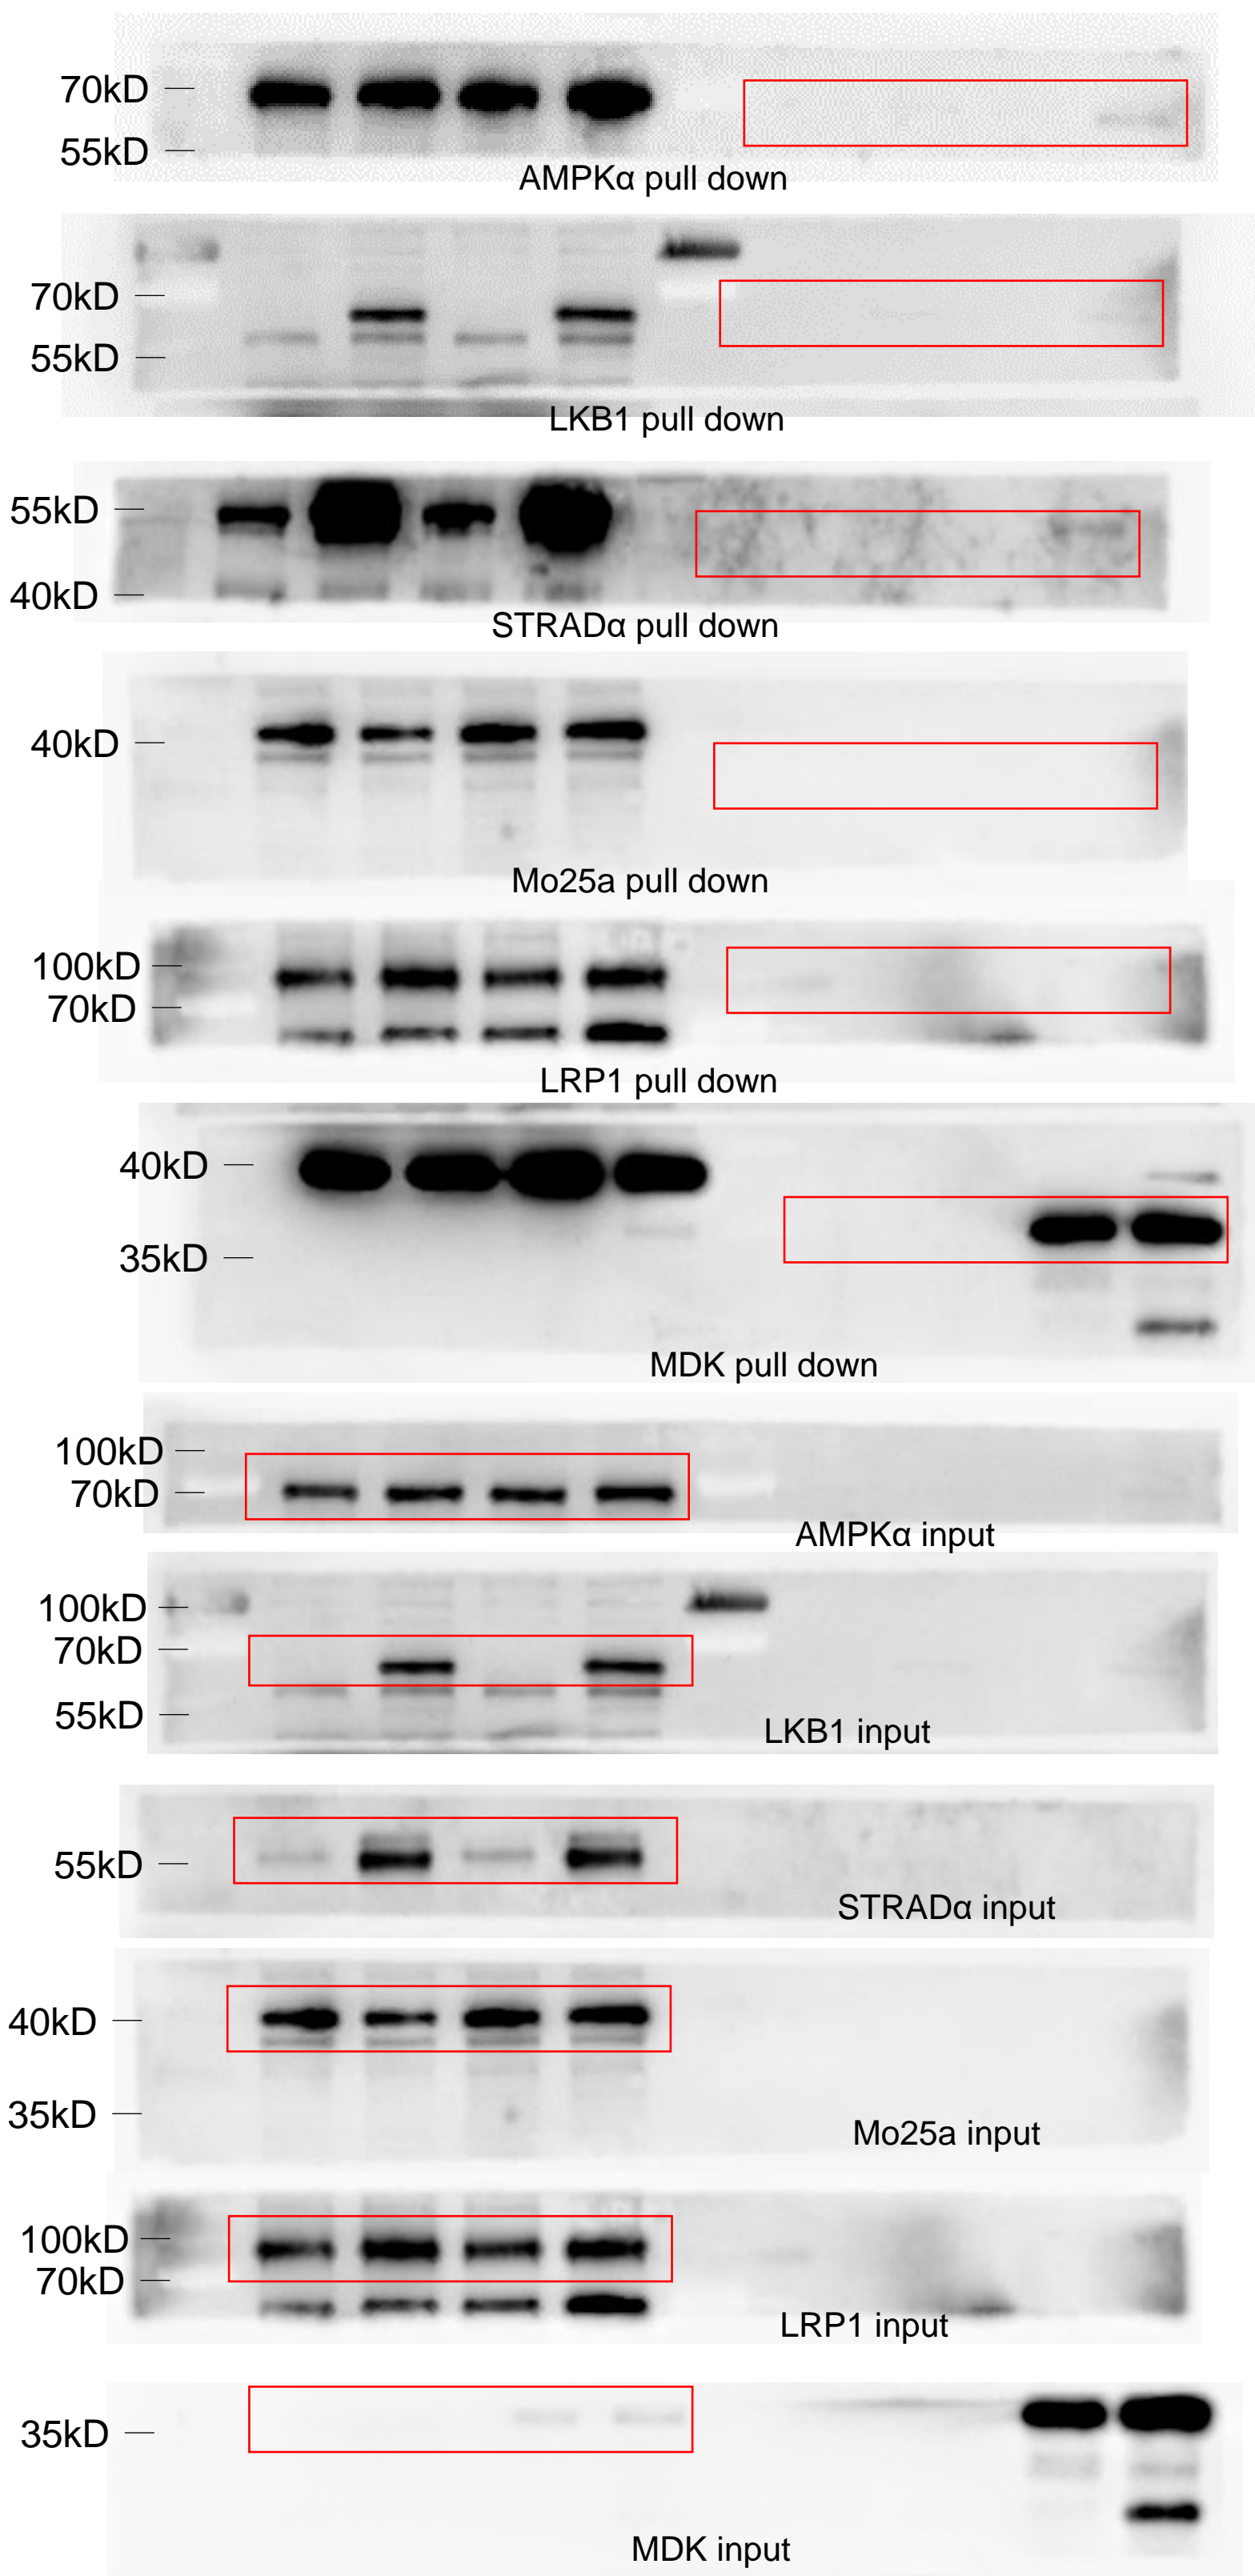

Supplemental Figure 2F

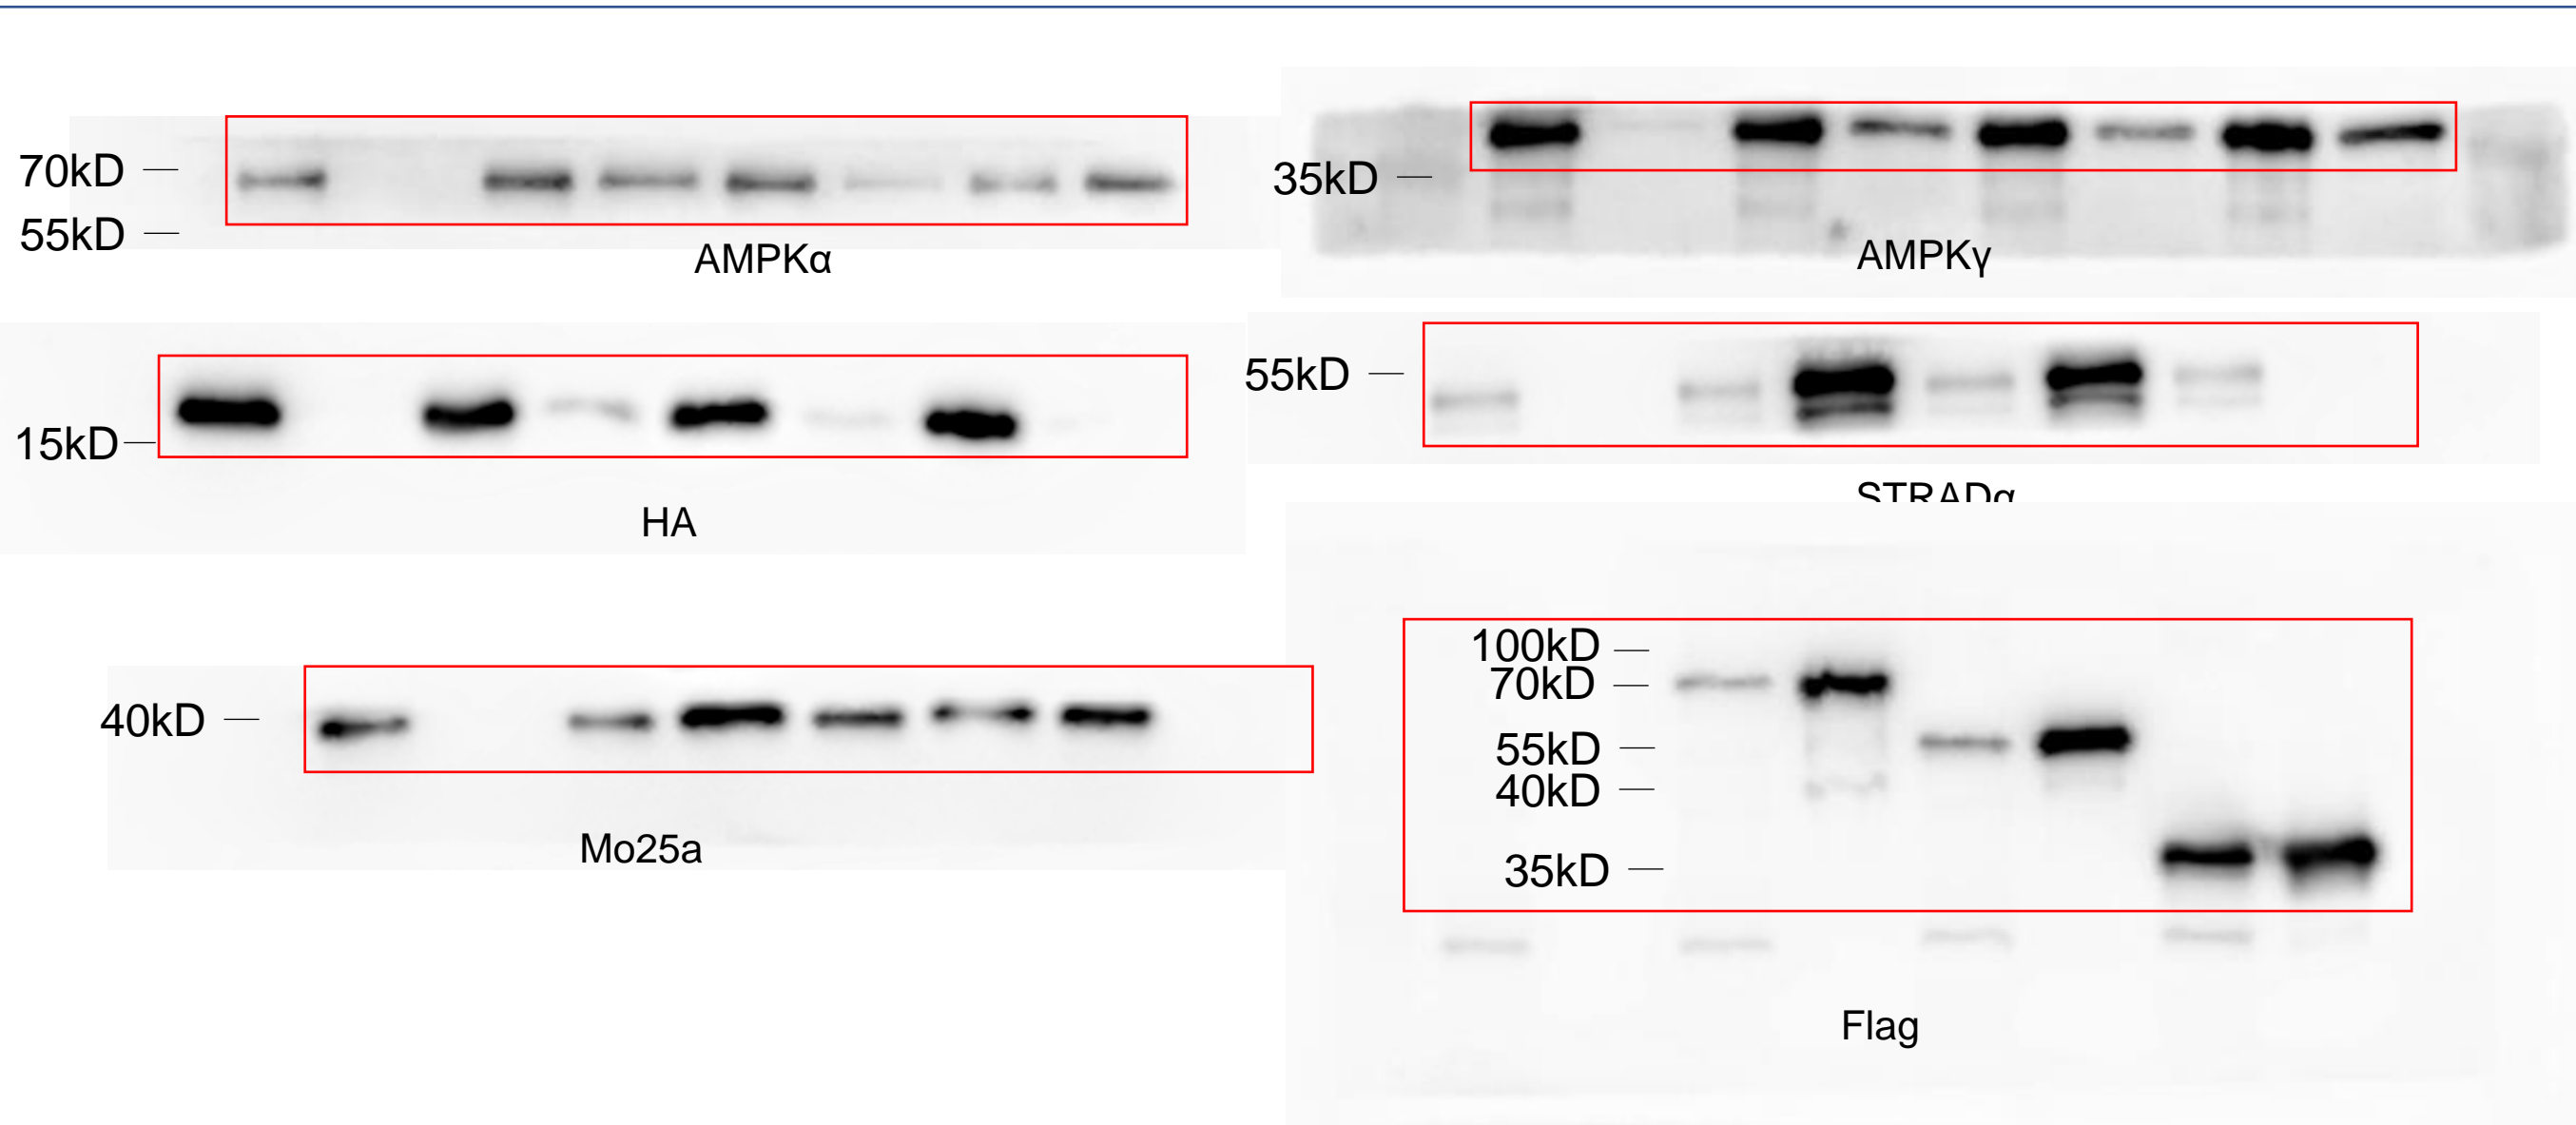

Supplemental Figure 3A

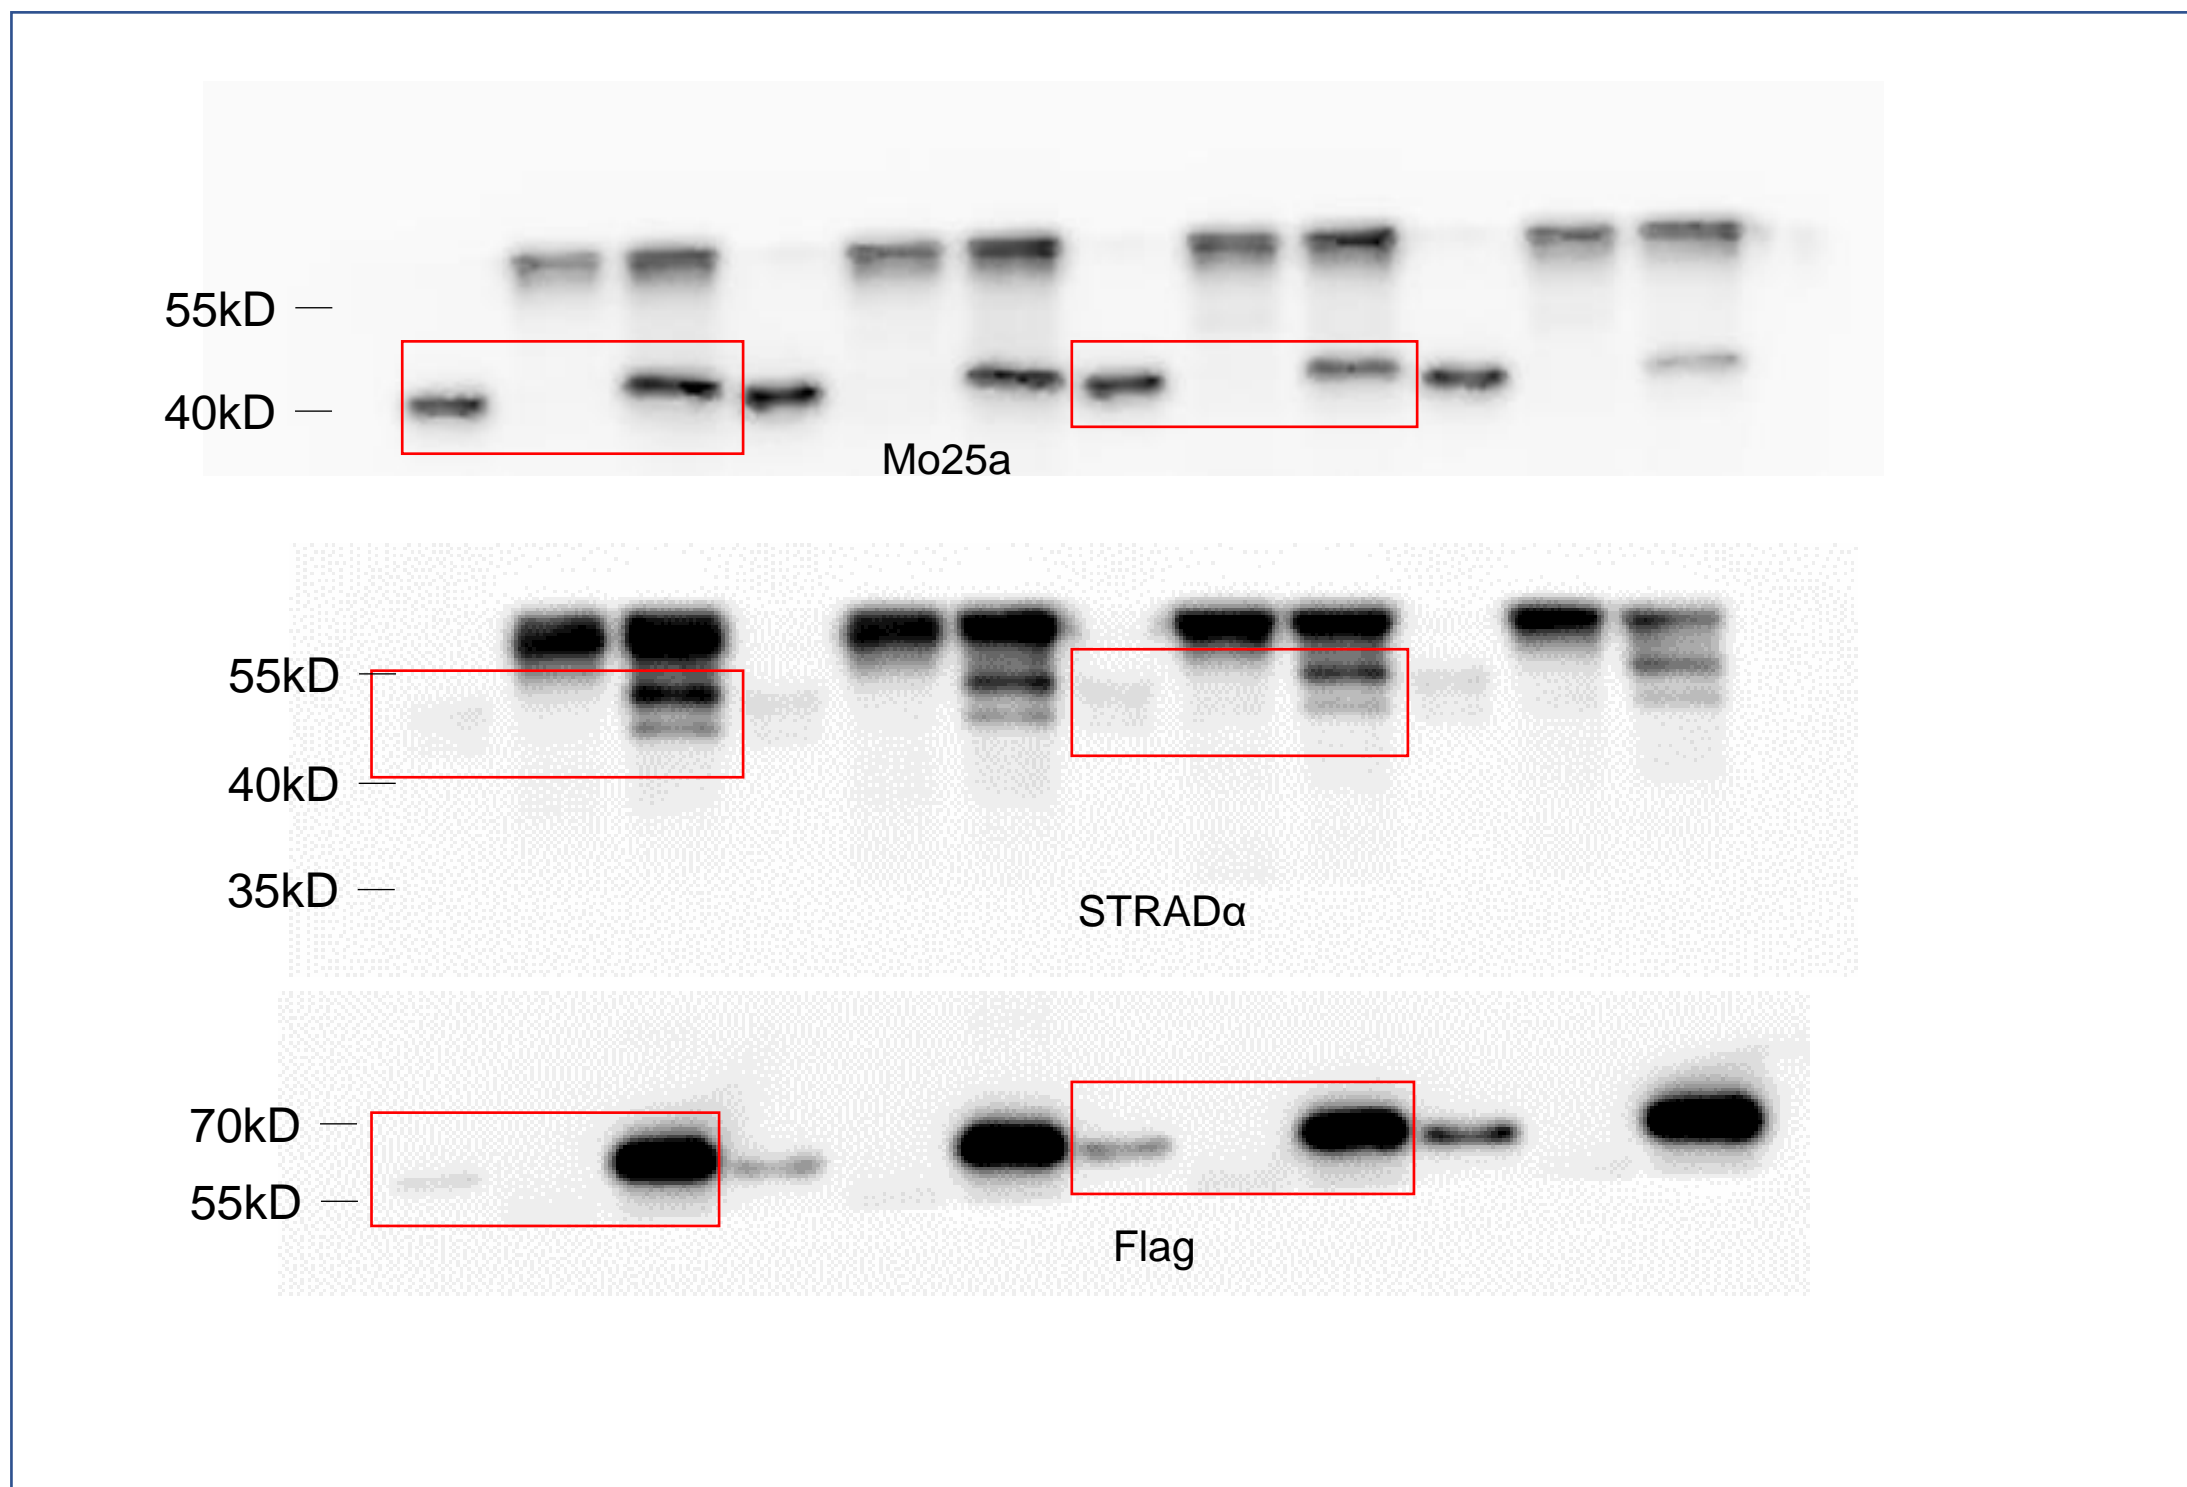

Supplemental Figure 3B

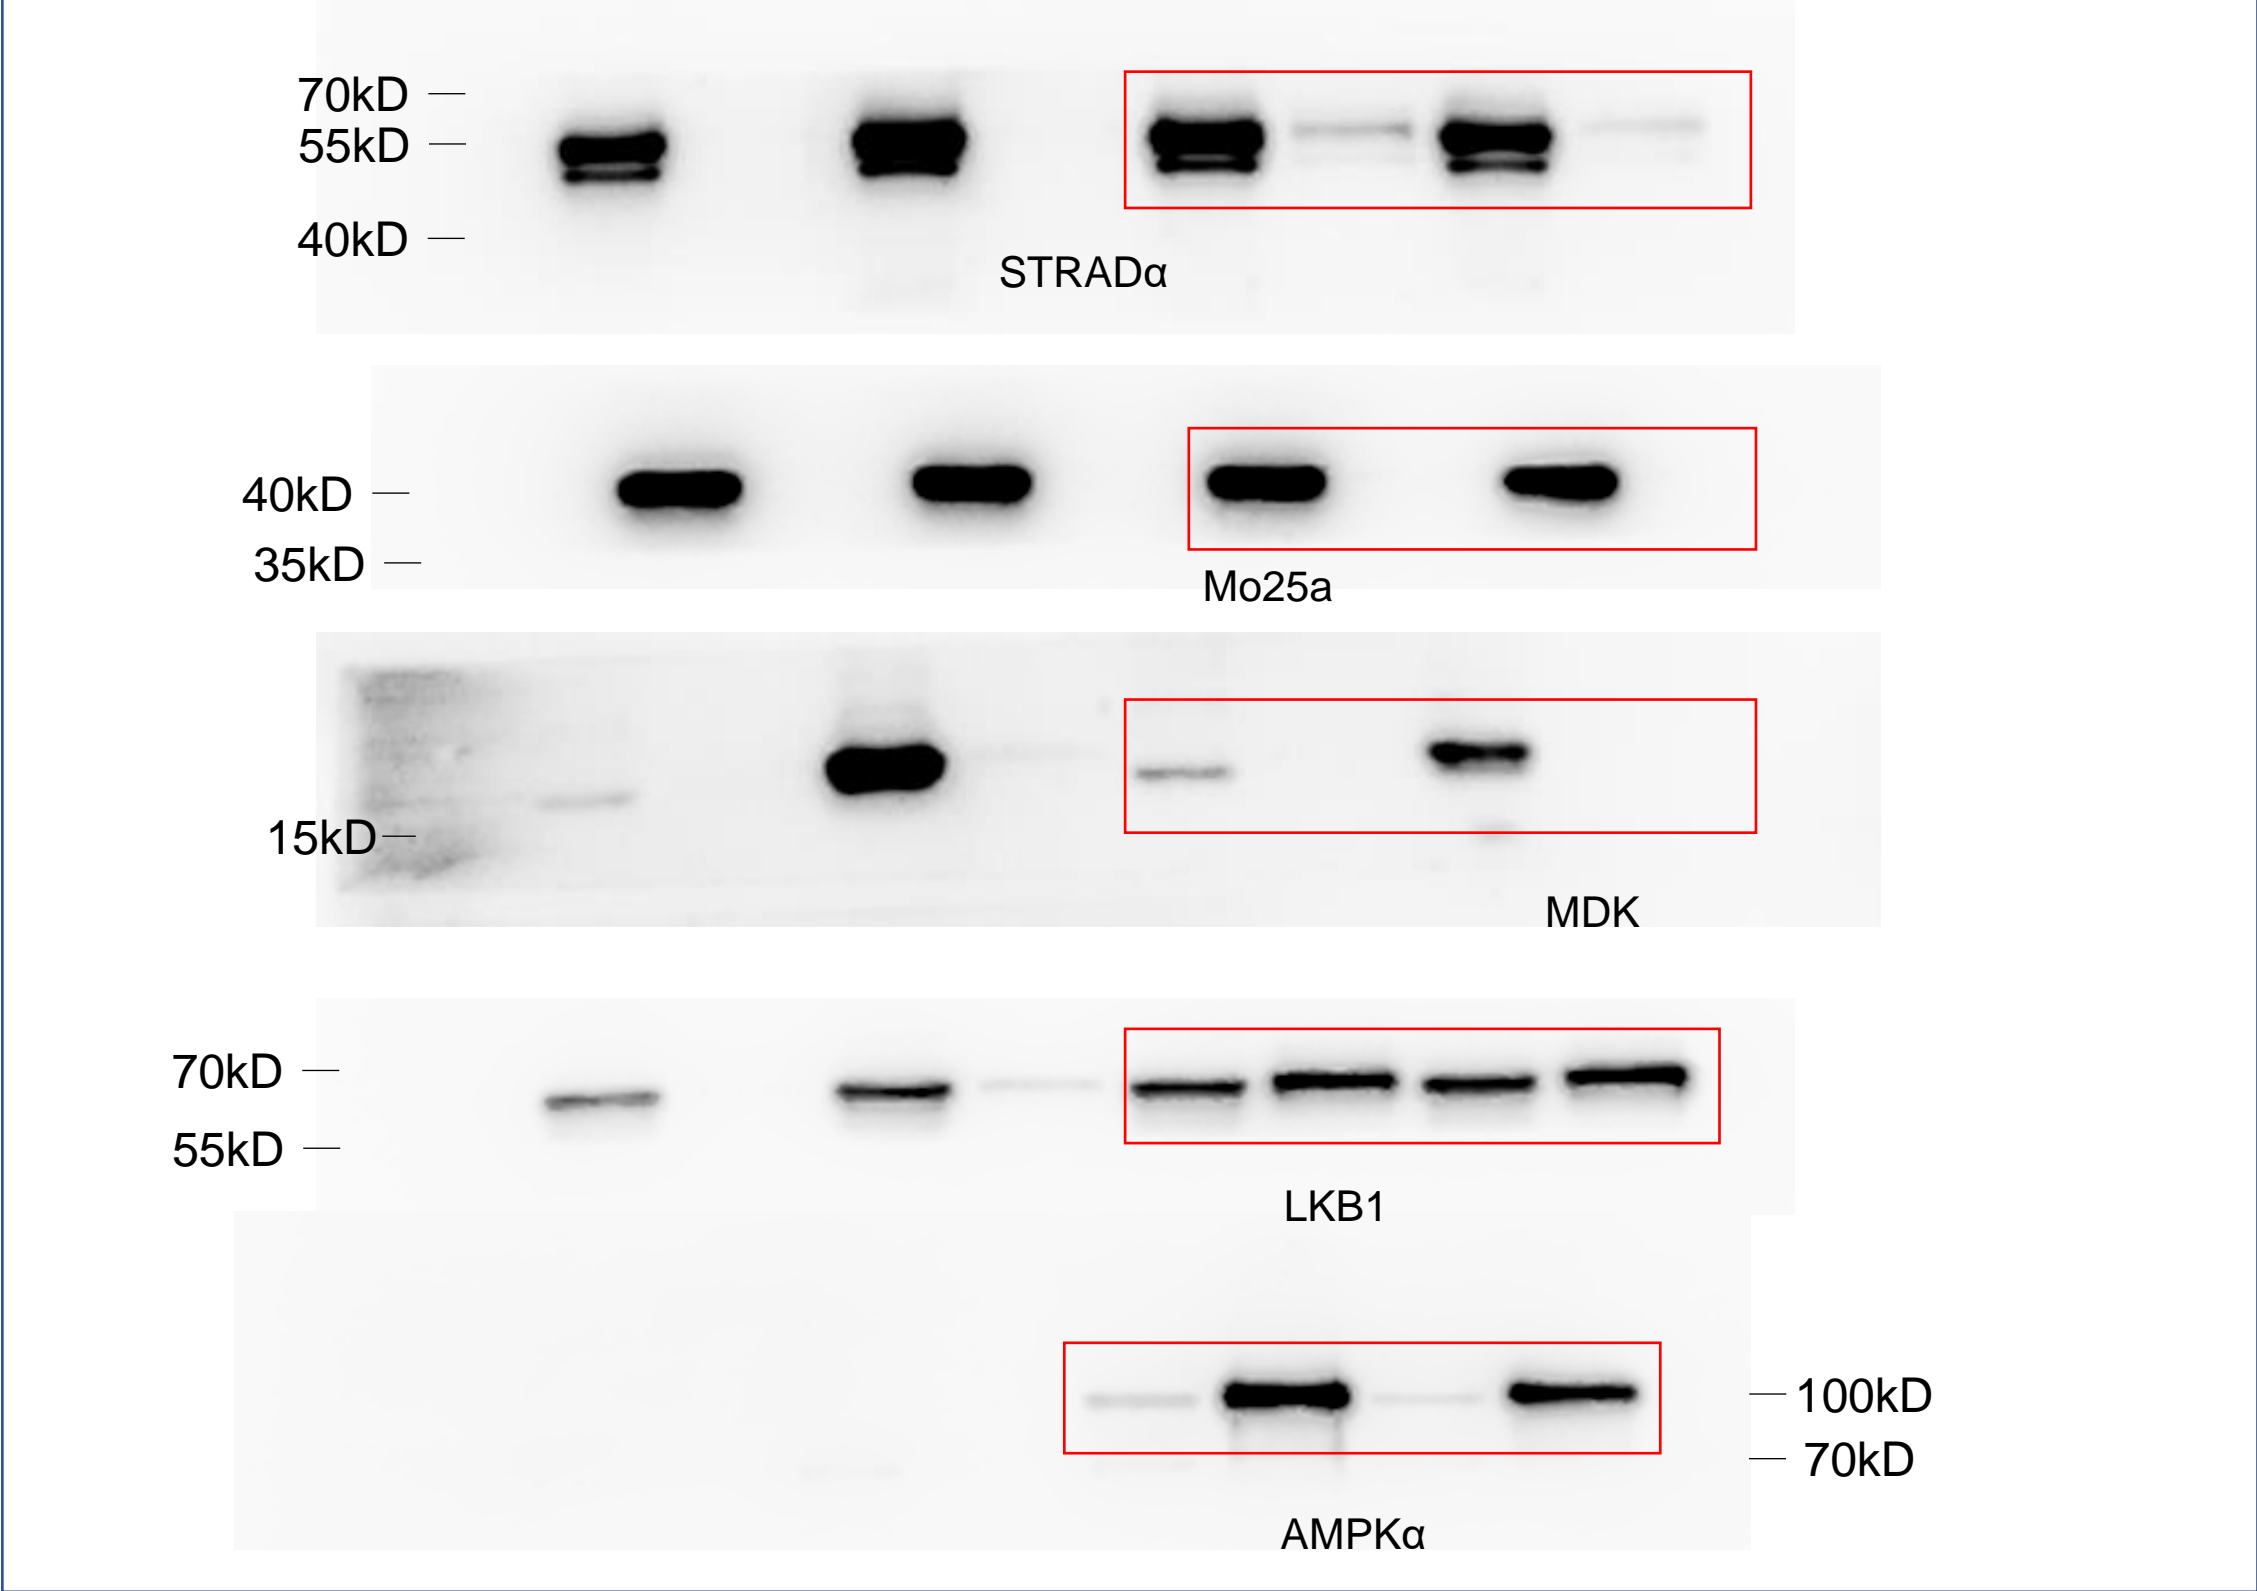

Supplemental Figure 3C

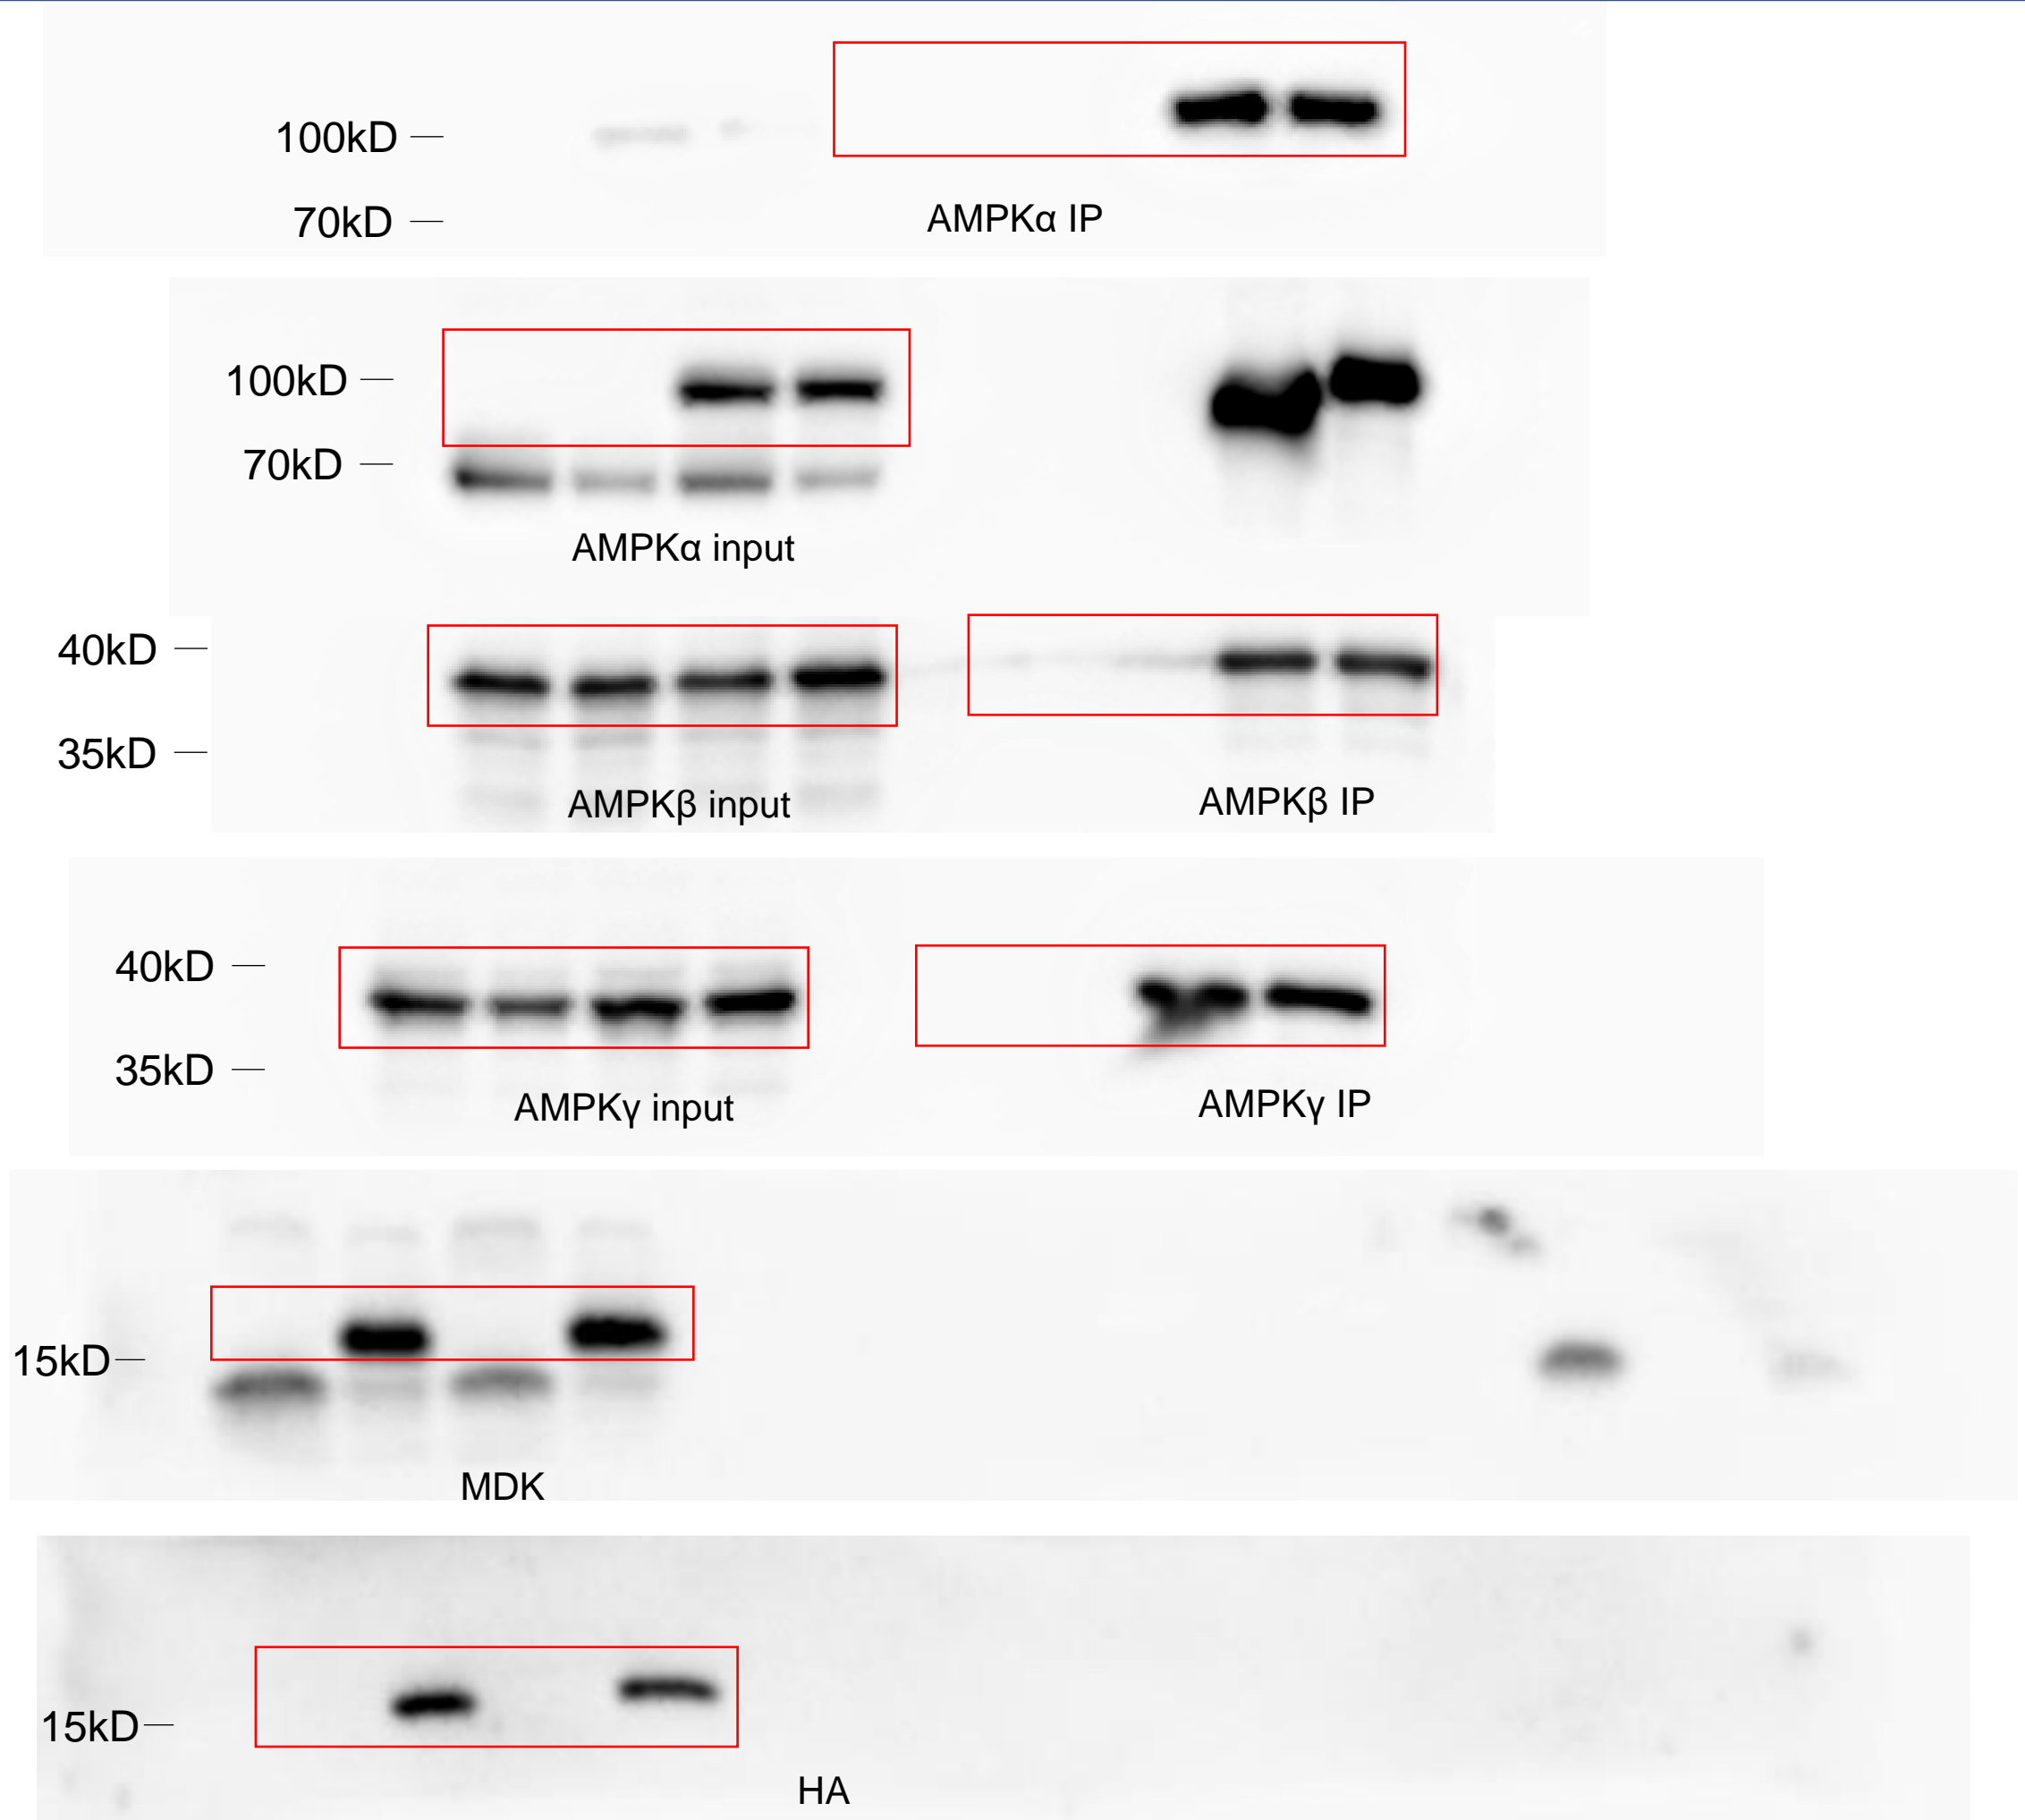

Supplemental Figure 3D

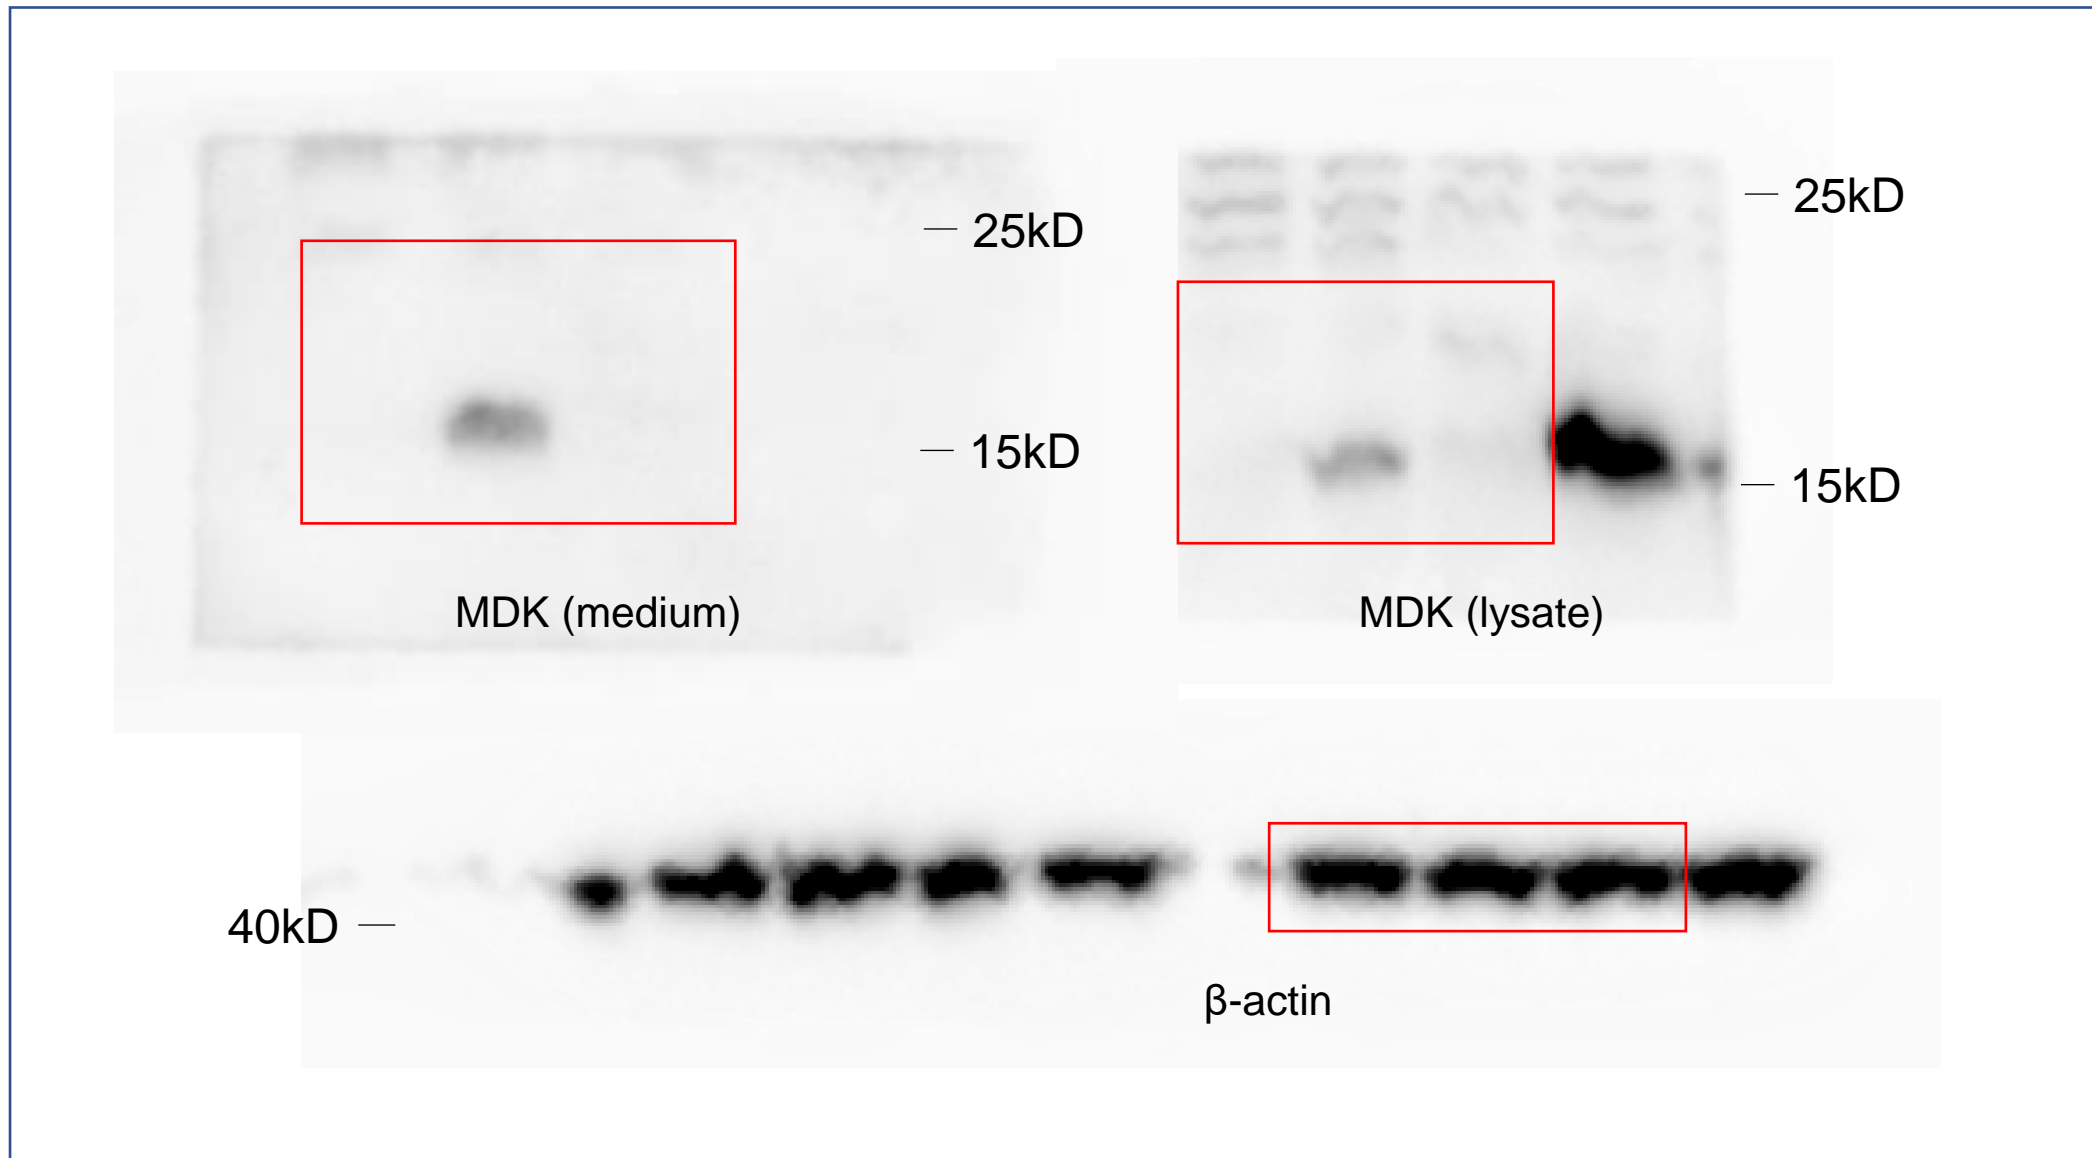

Supplemental Figure 3E

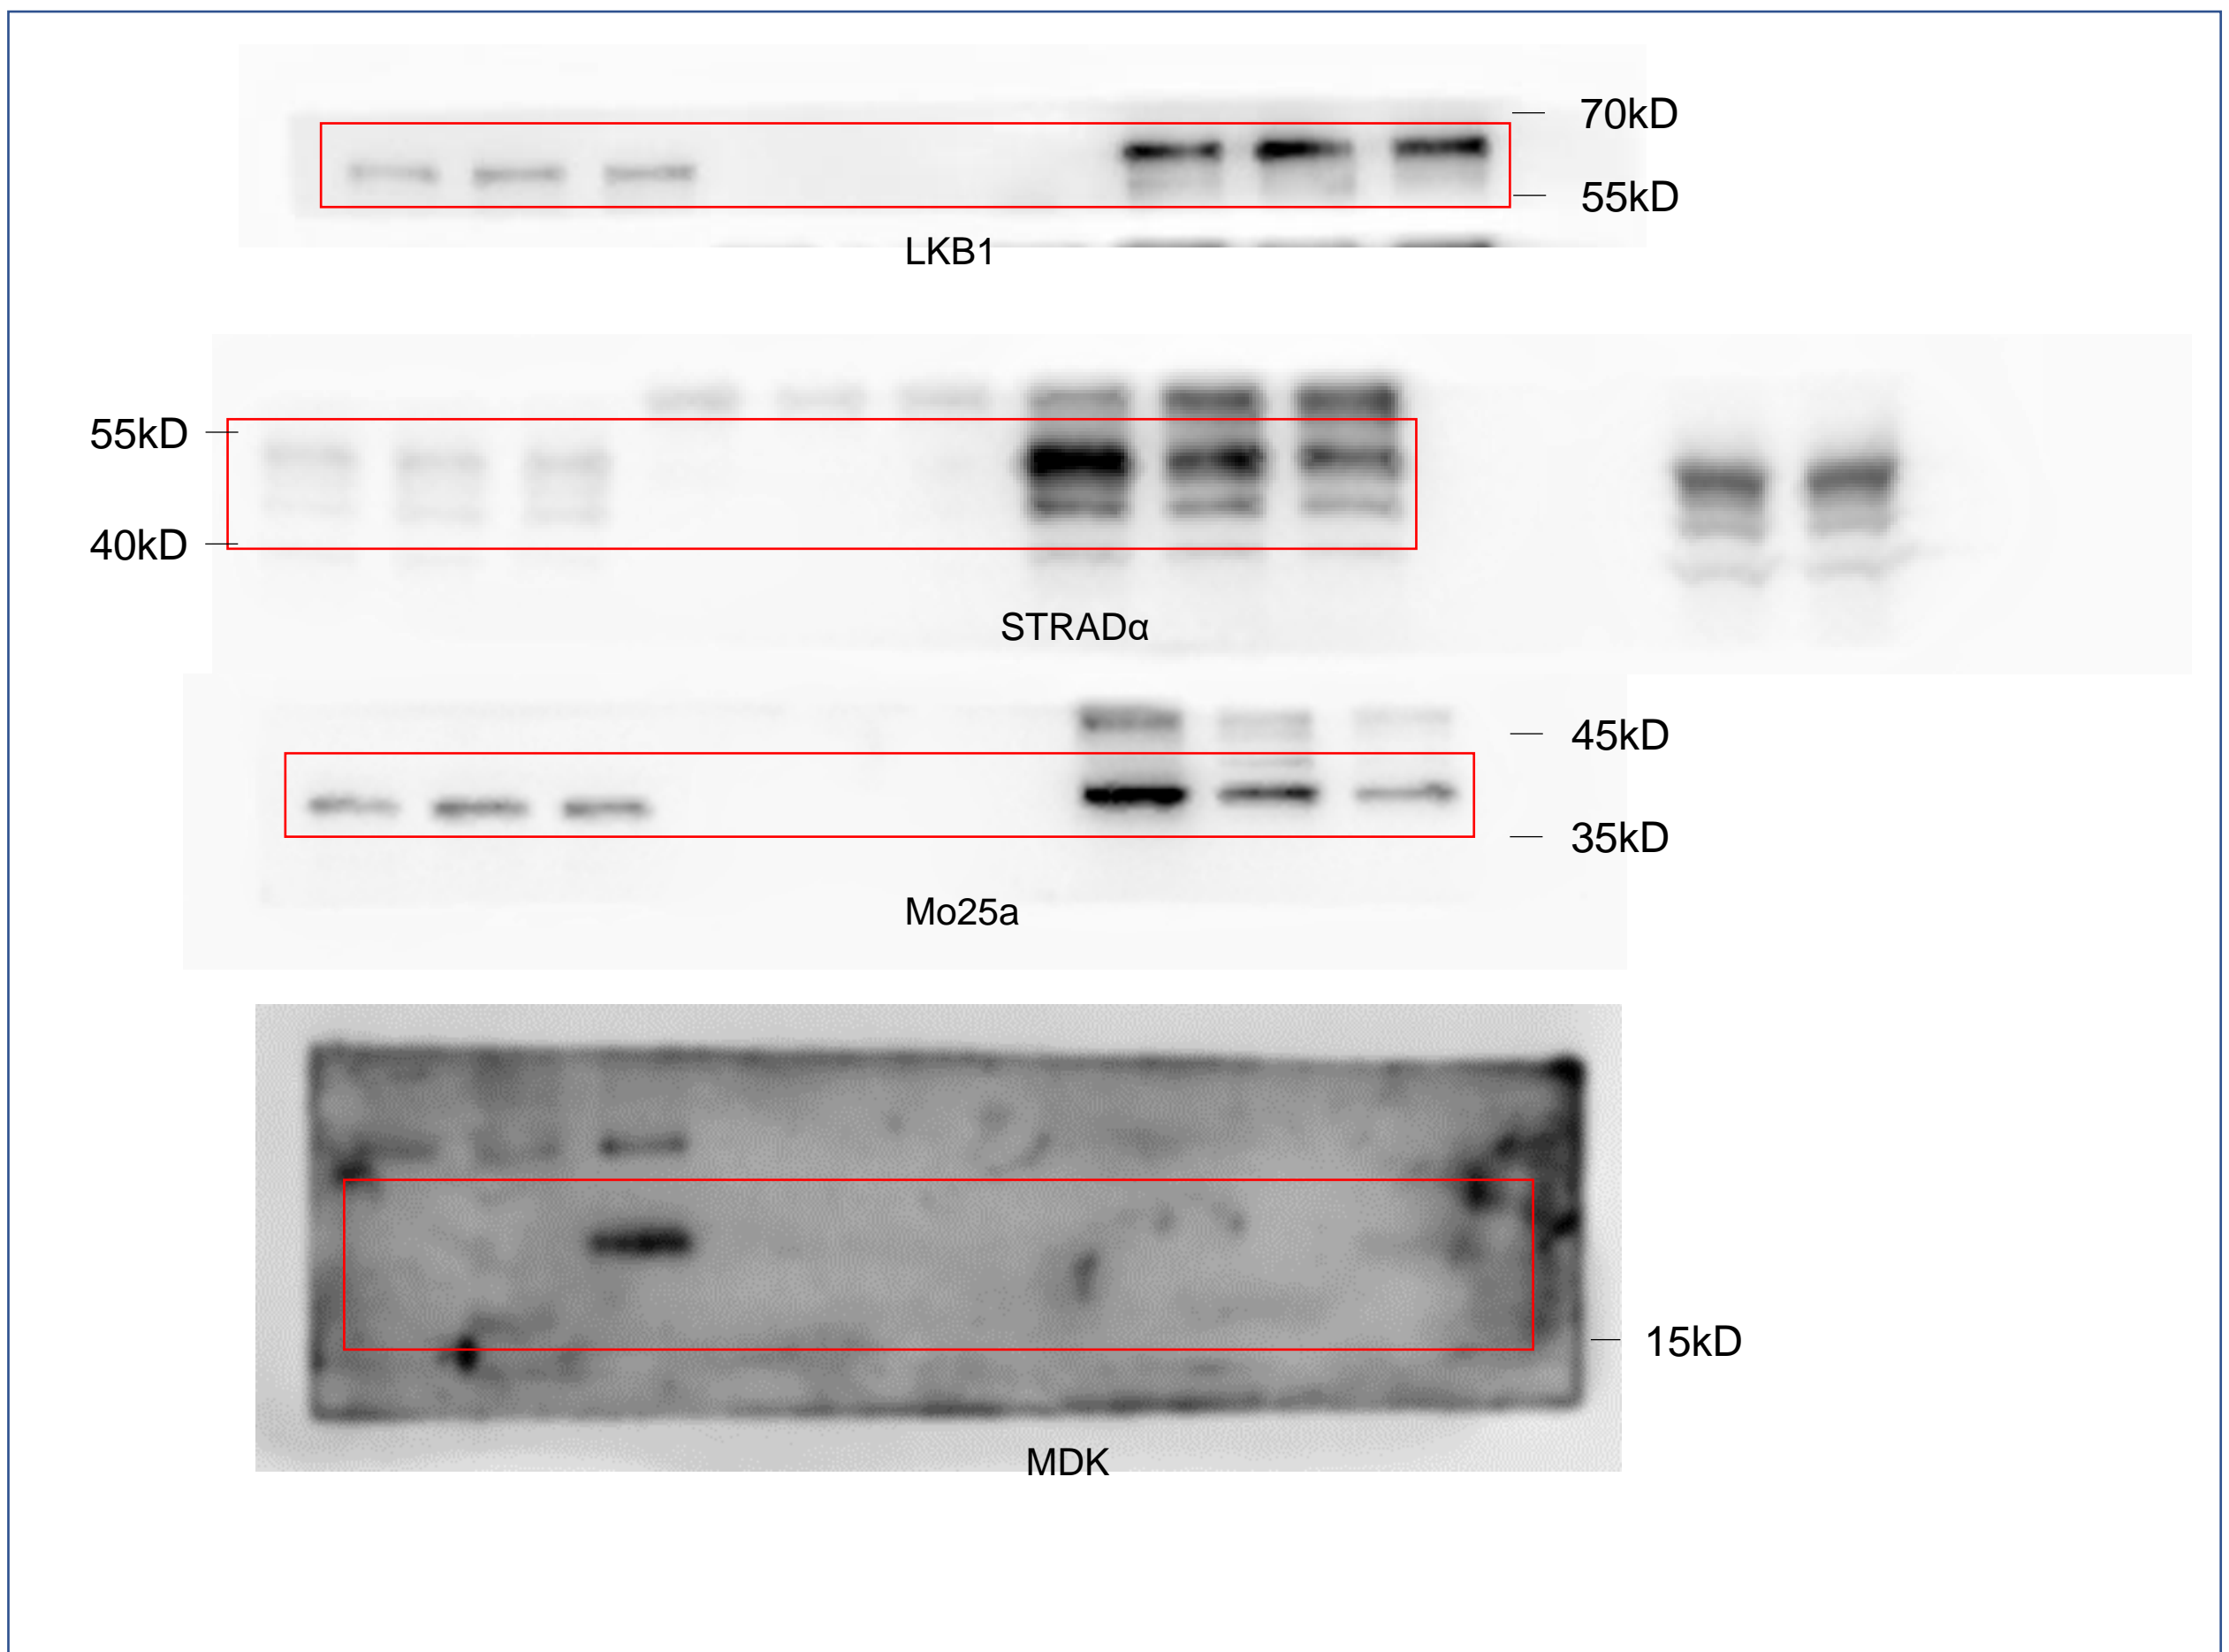



Supplemental Figure 3F

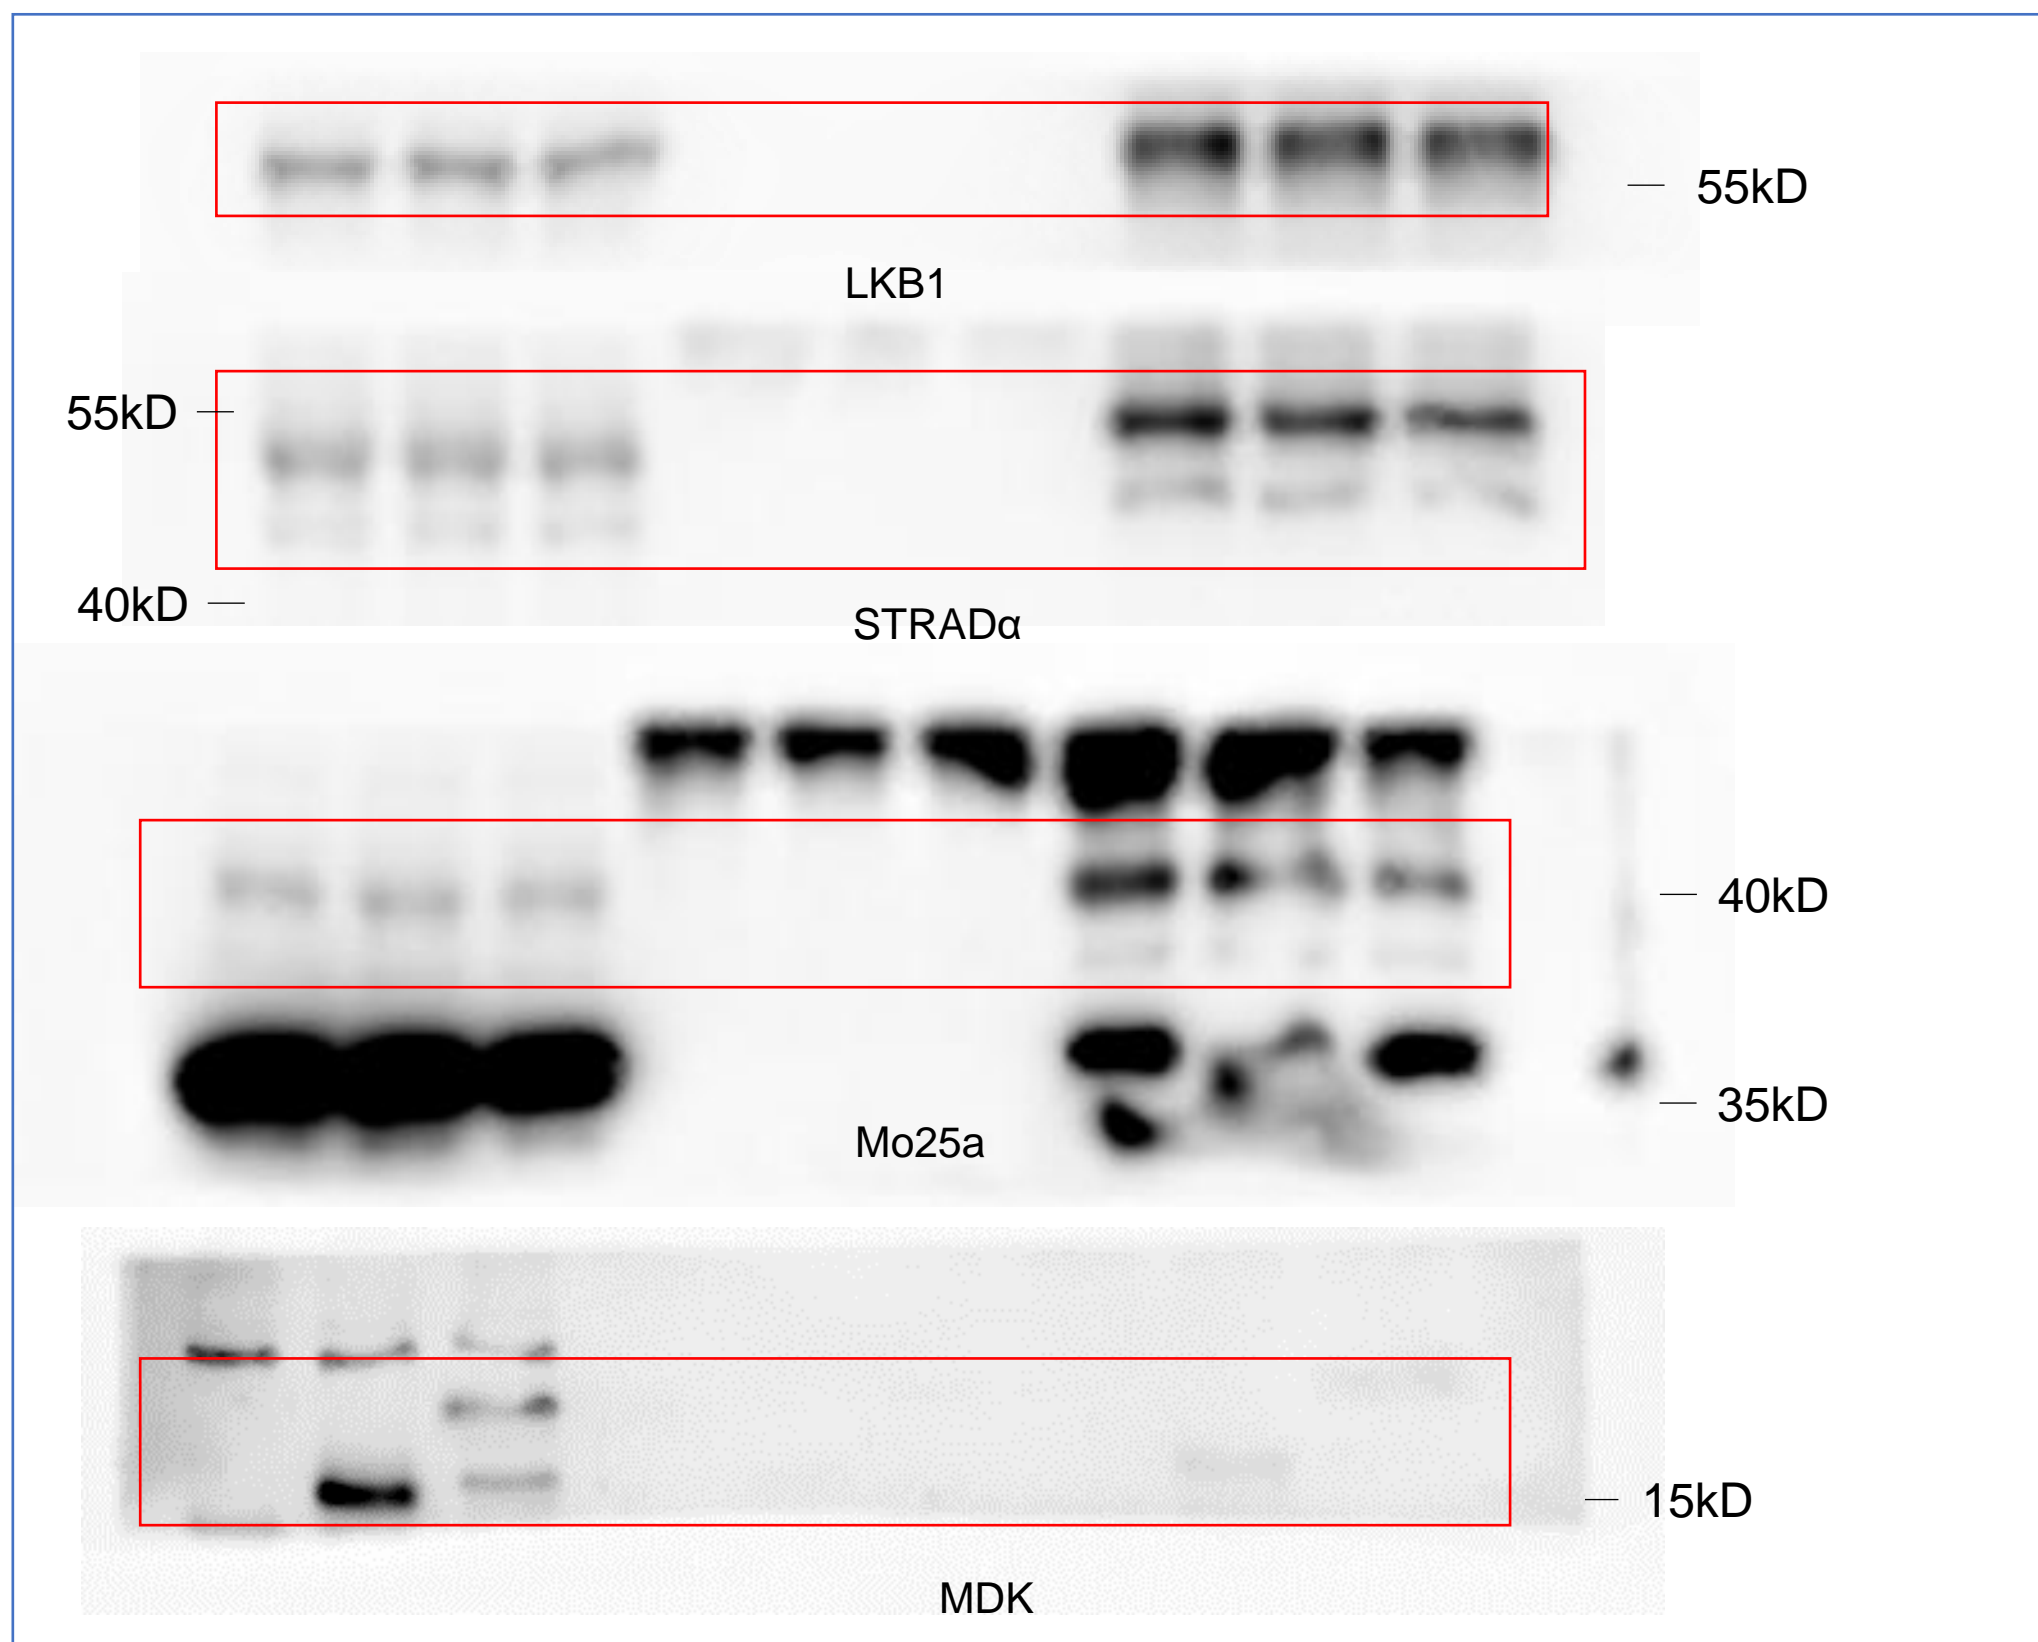

Supplemental Figure 3G

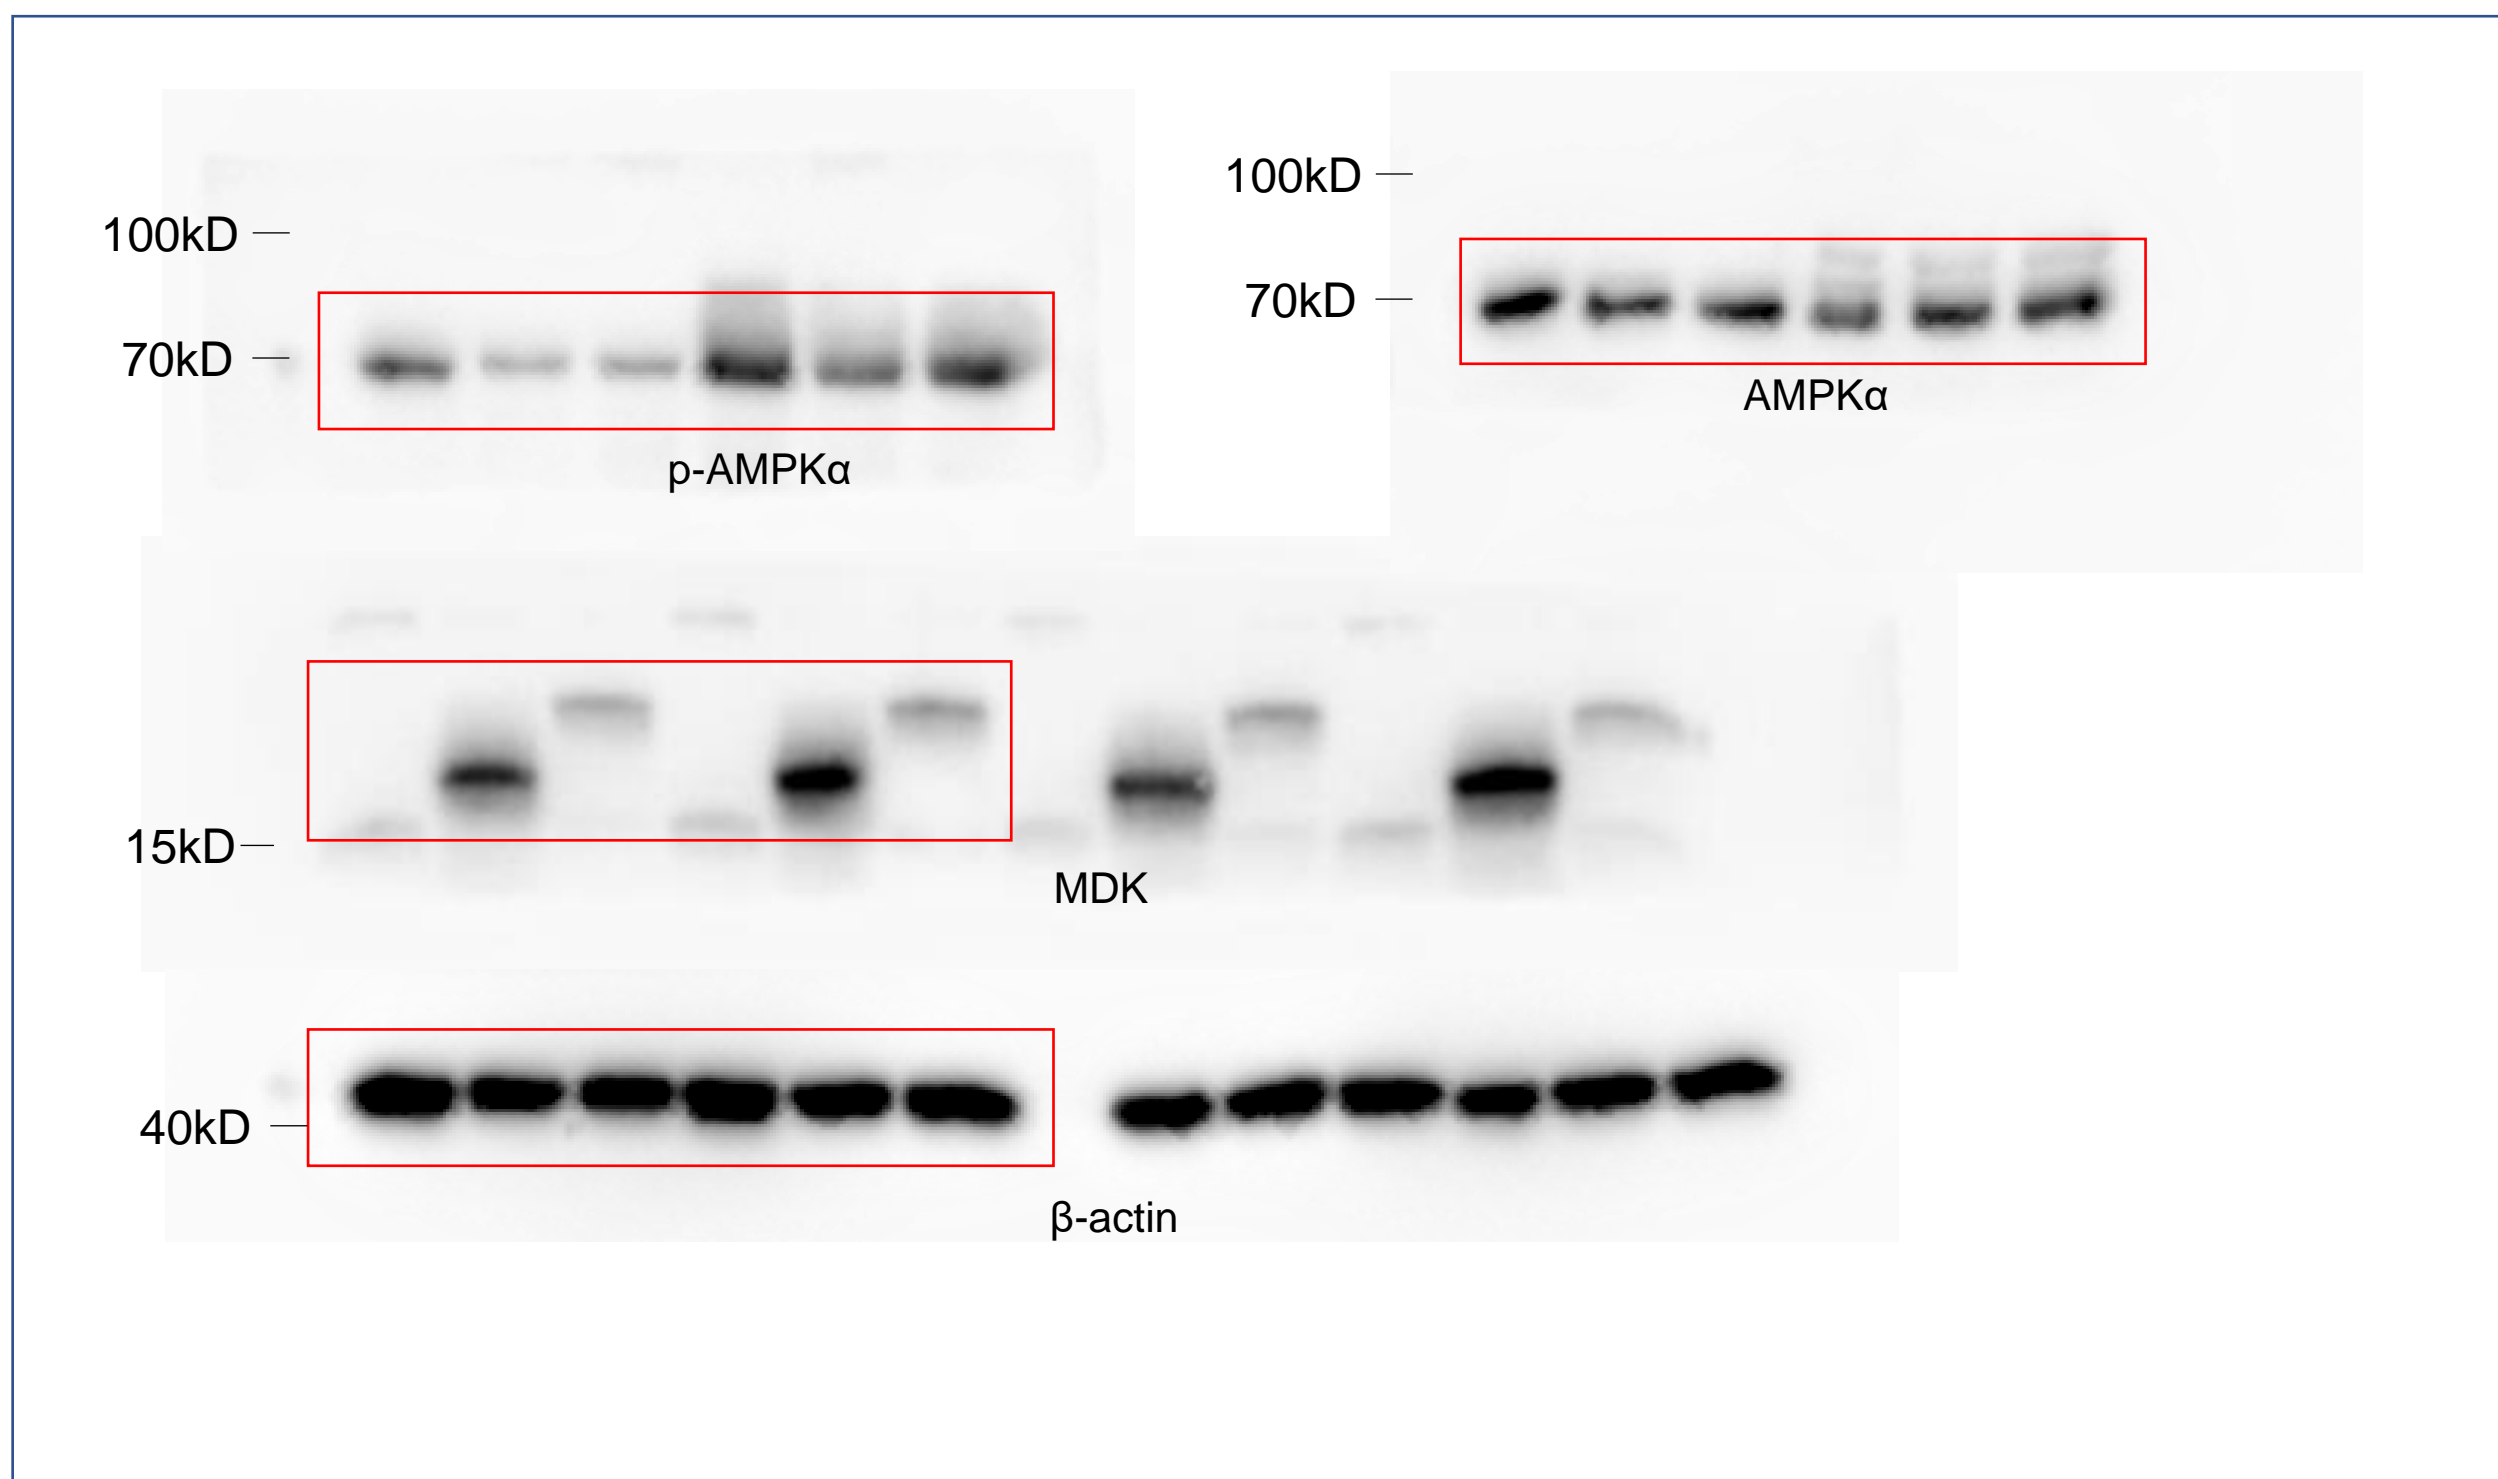

Supplemental Figure 4C

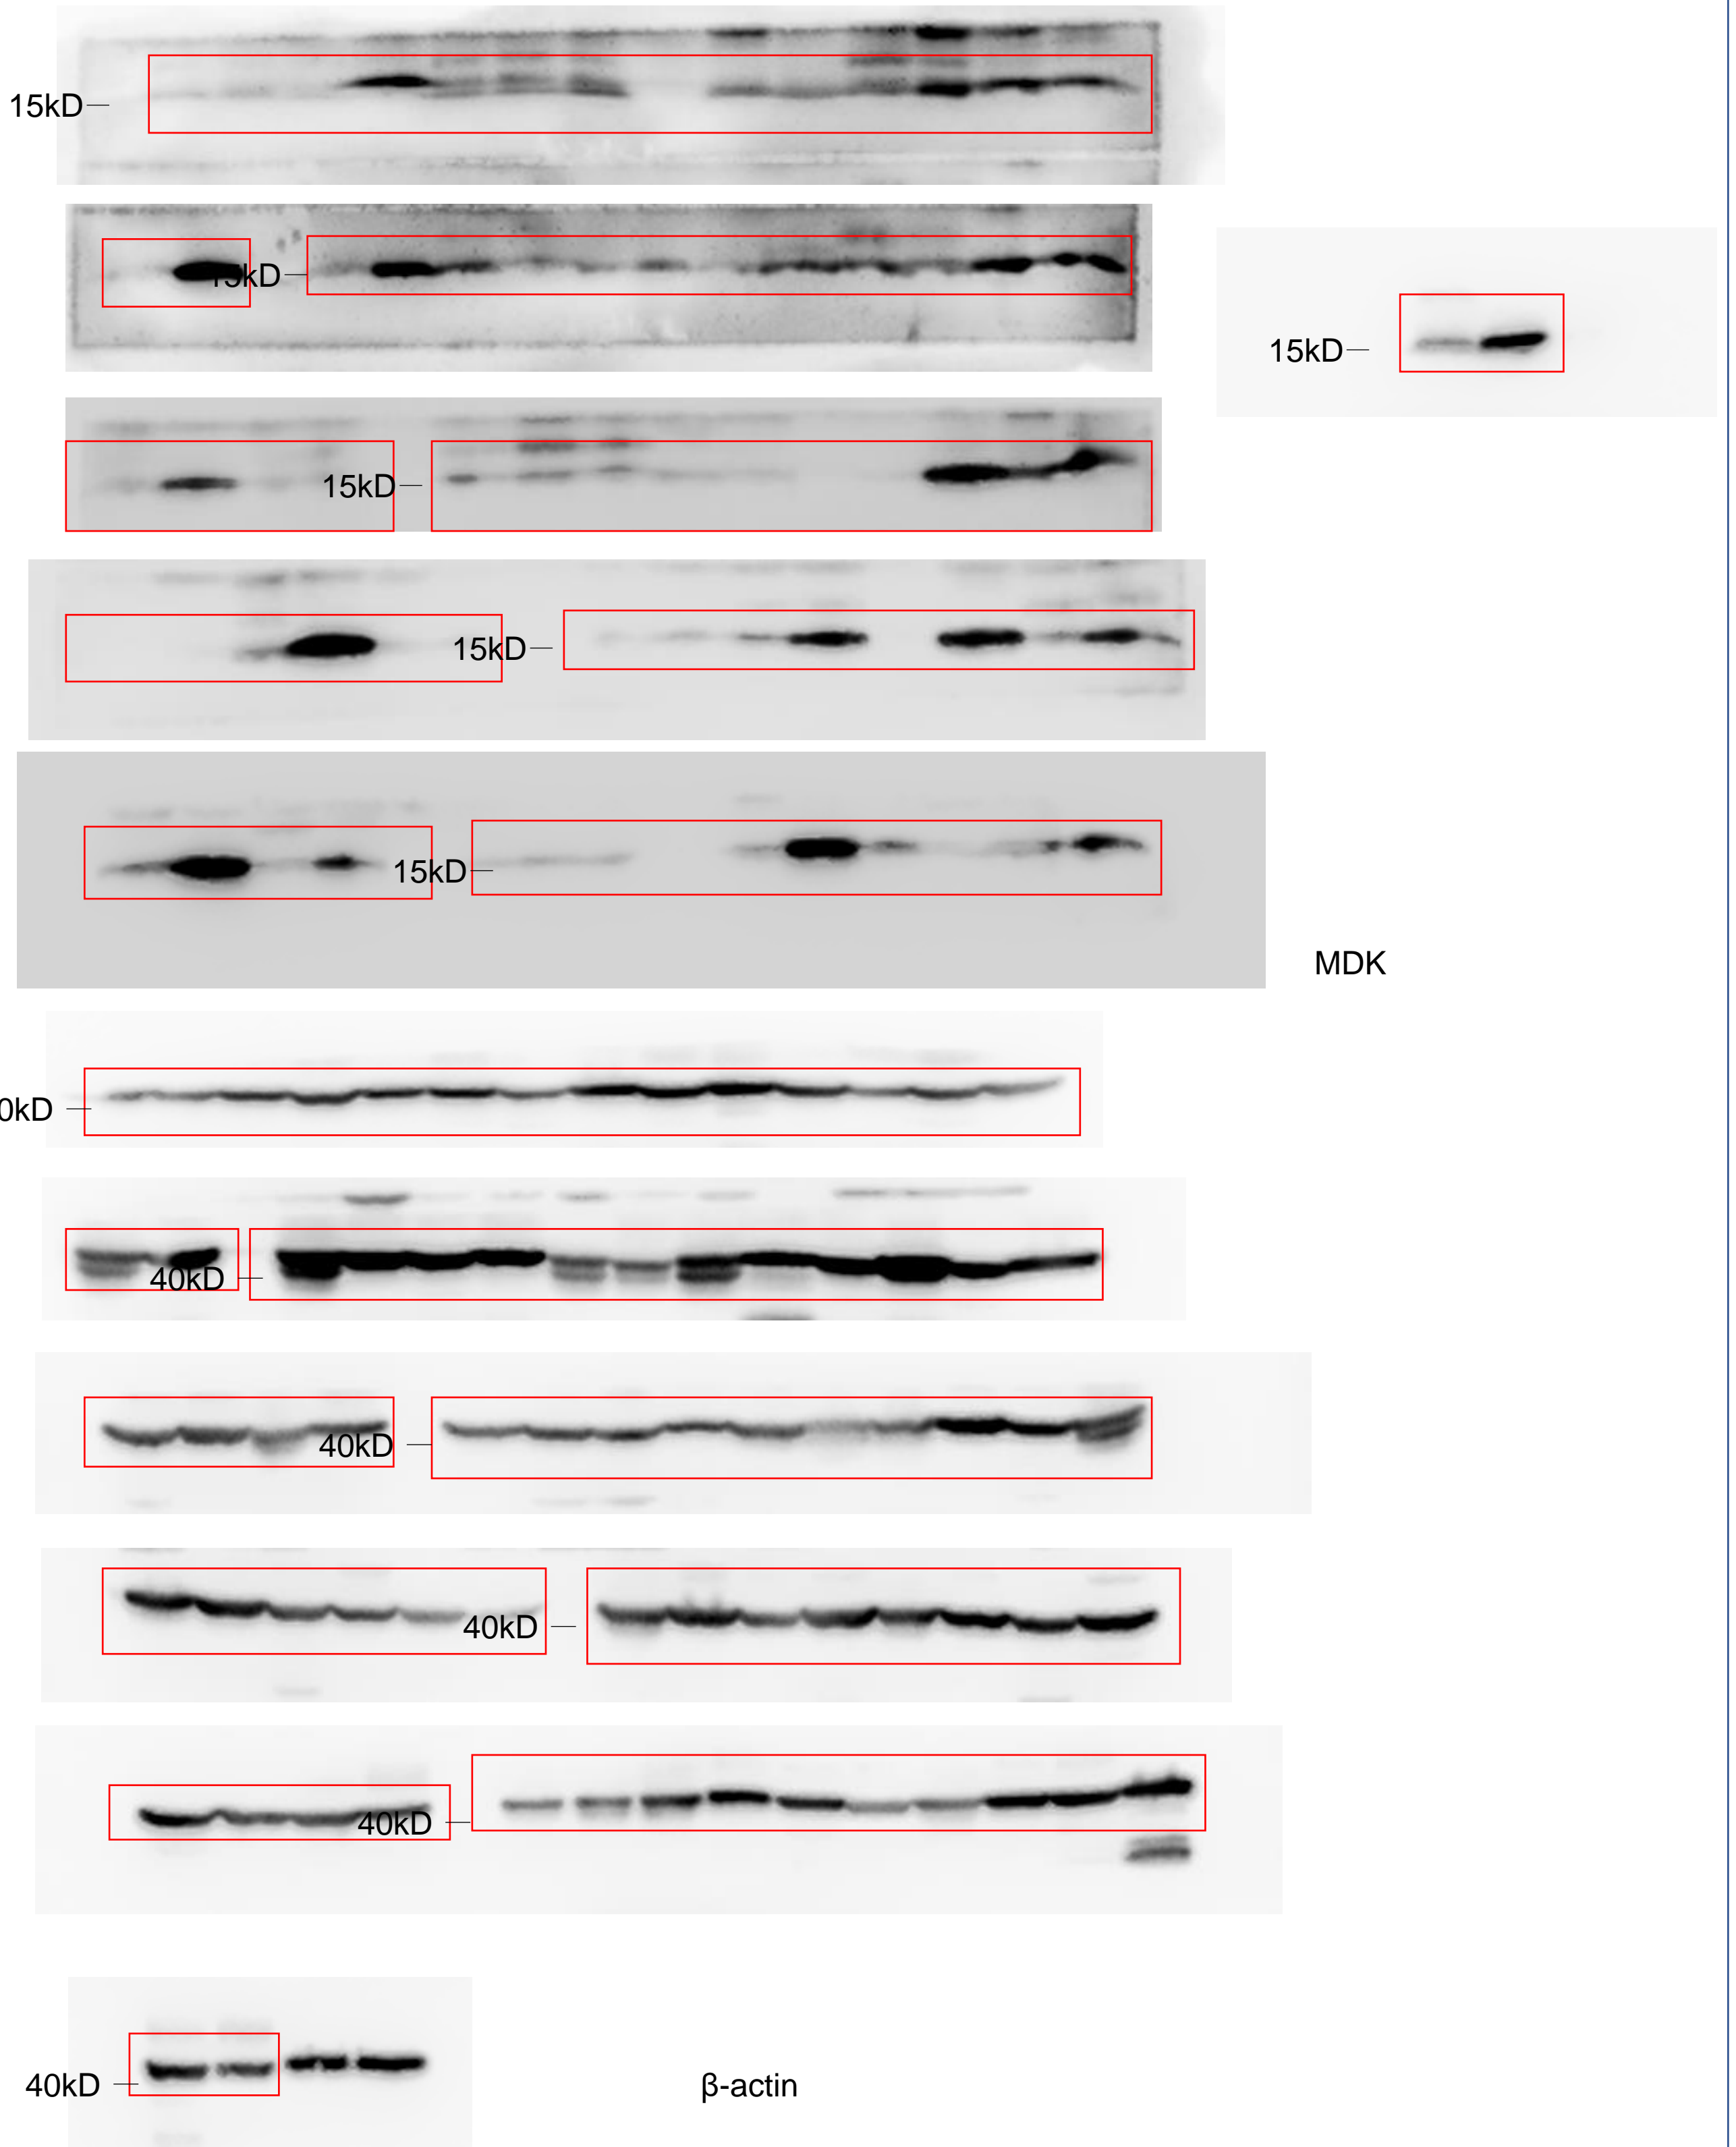

Supplemental Figure 5A

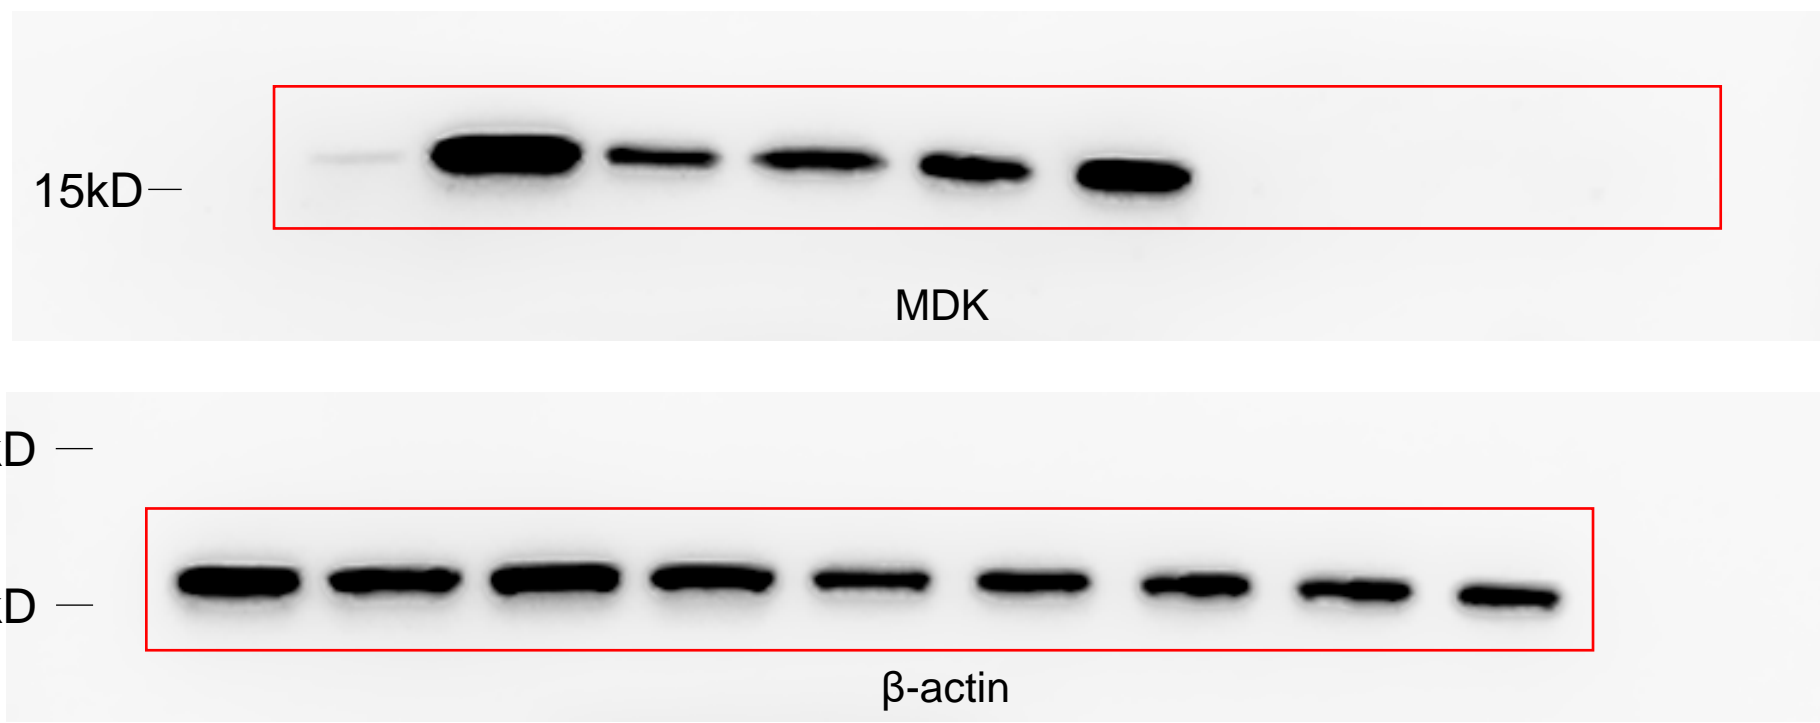

Supplemental Figure 5B

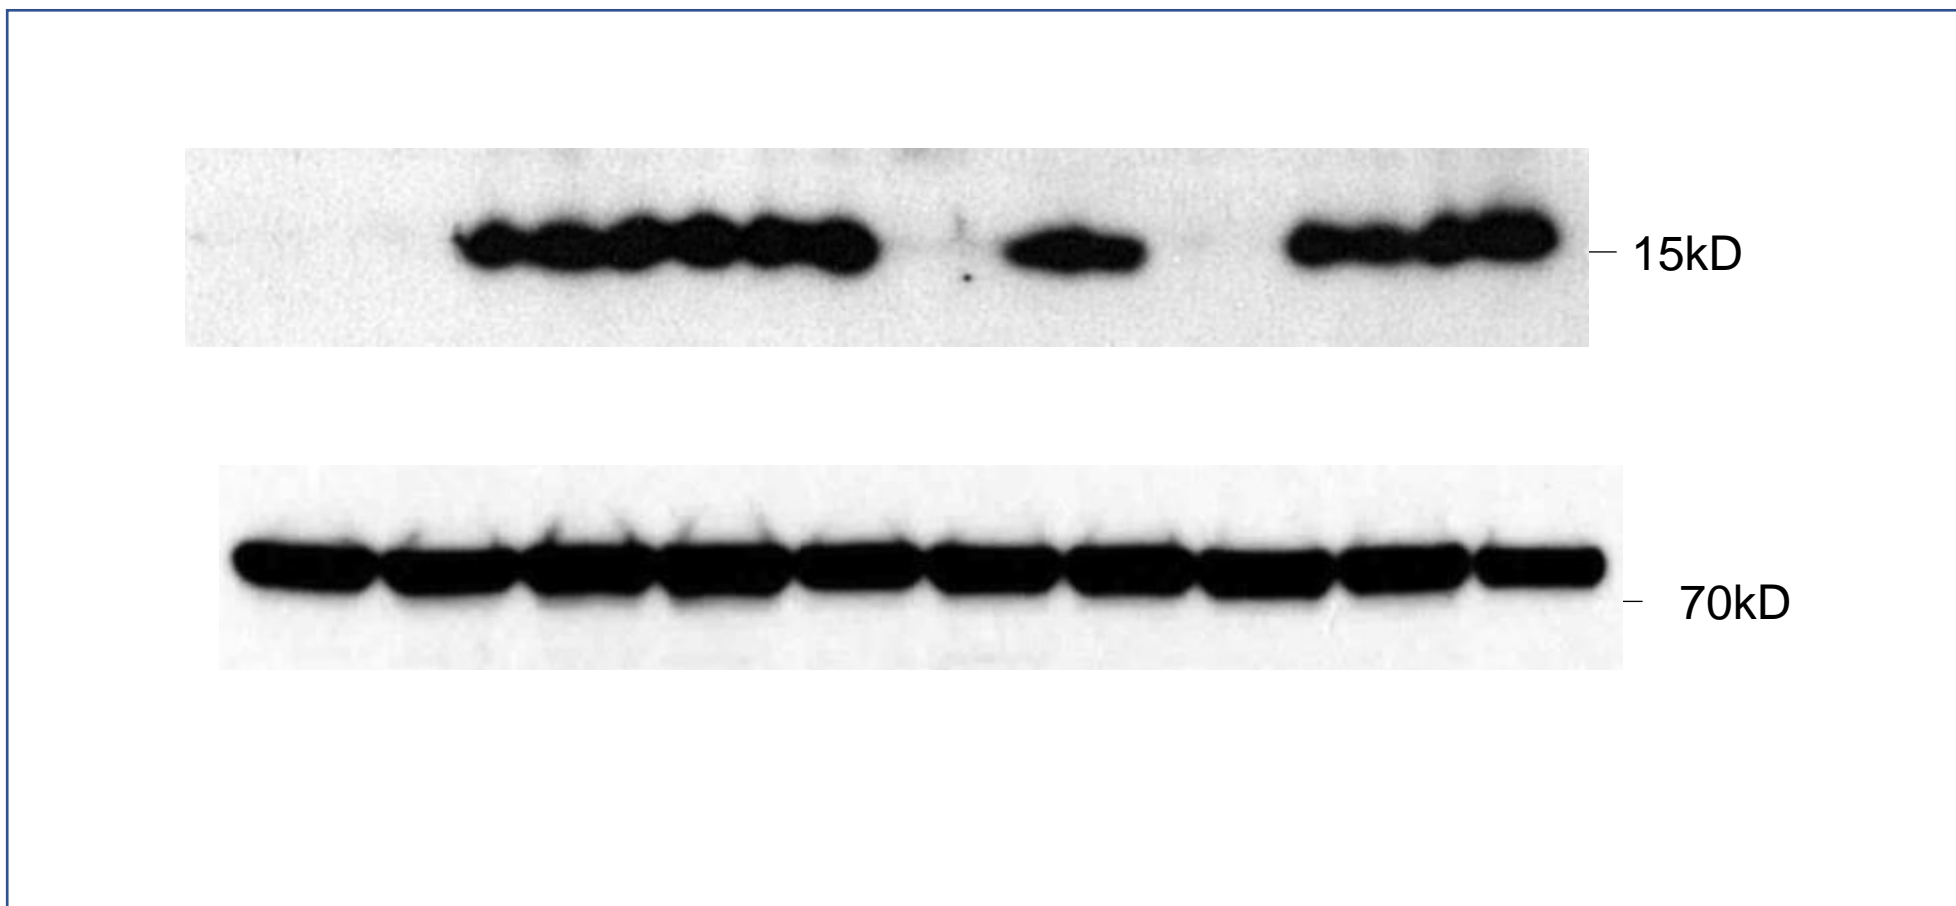

Supplemental Figure 5D

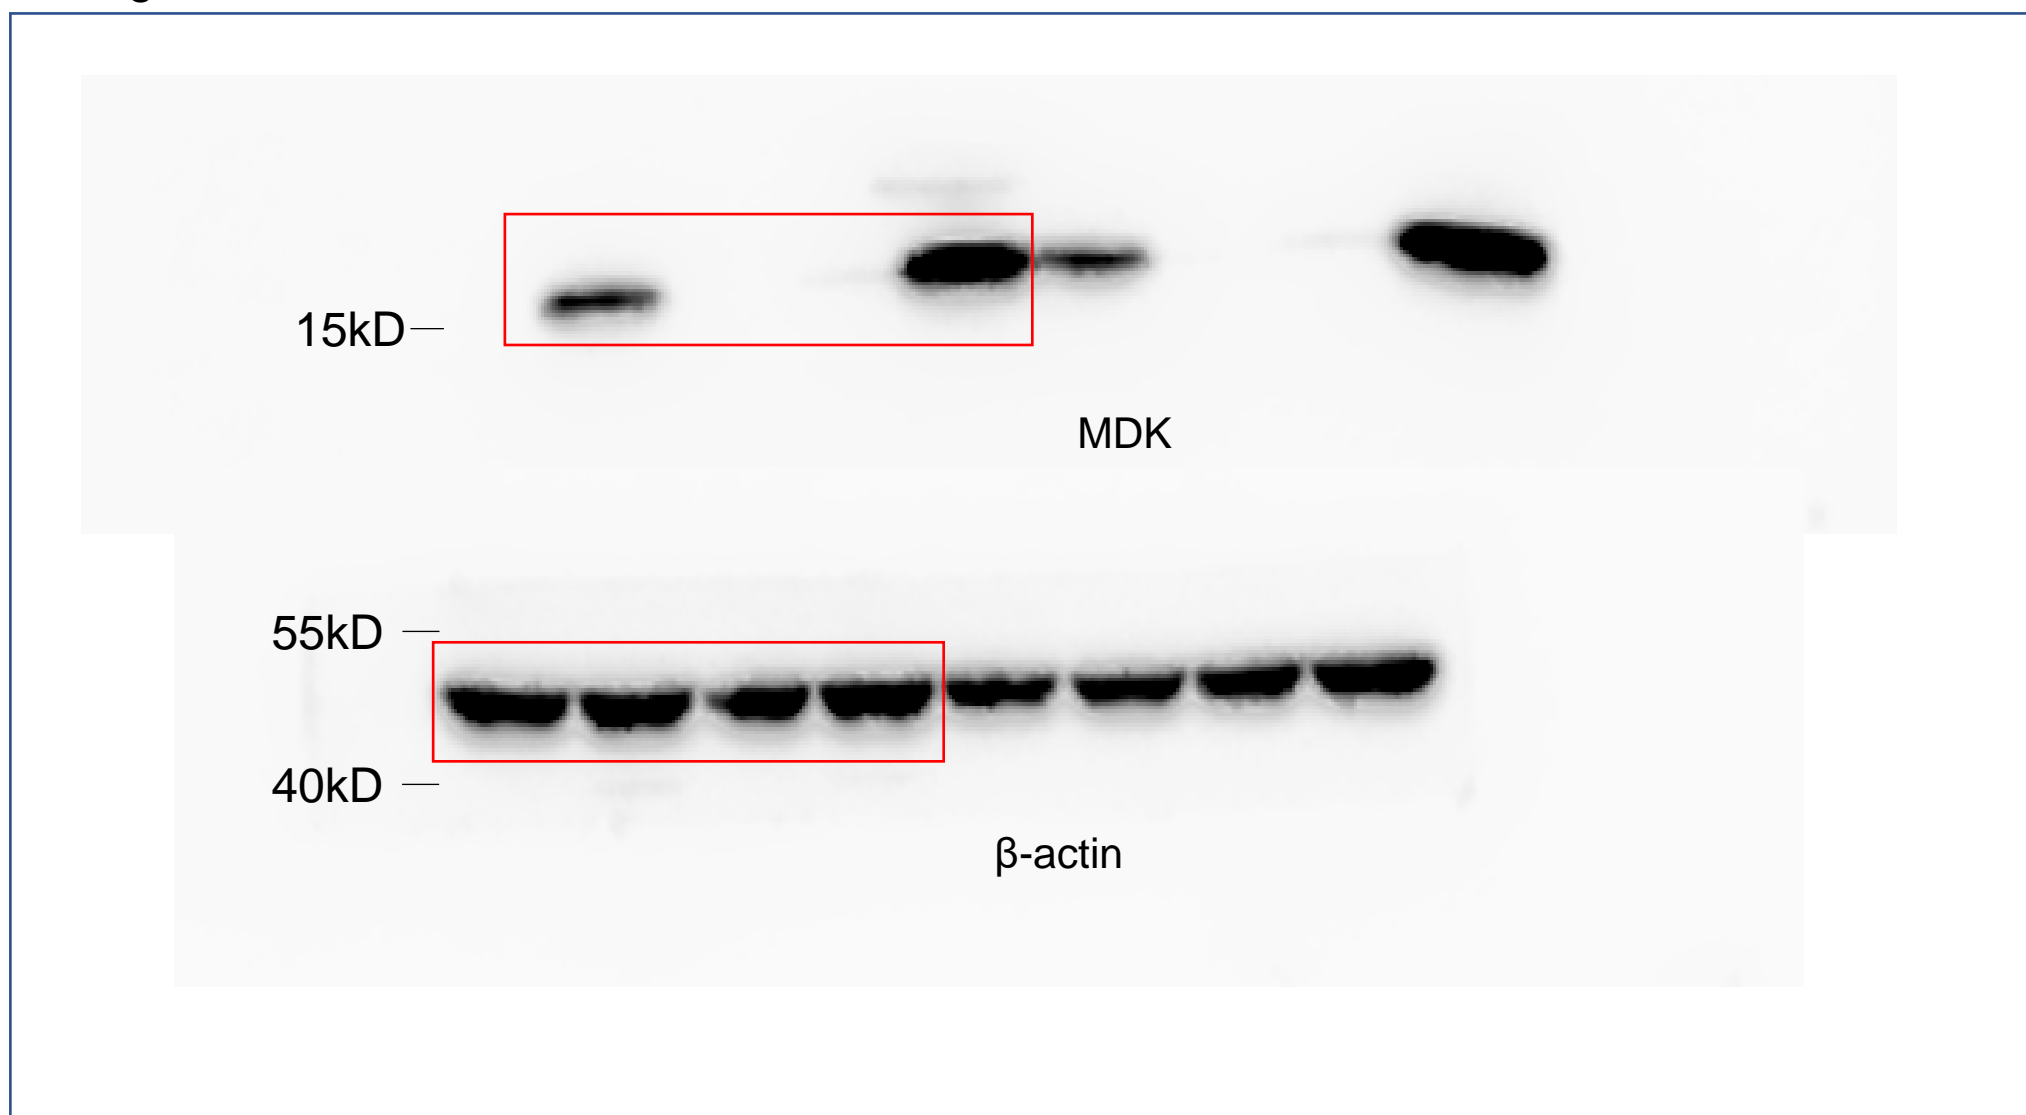

Supplemental Figure 5G

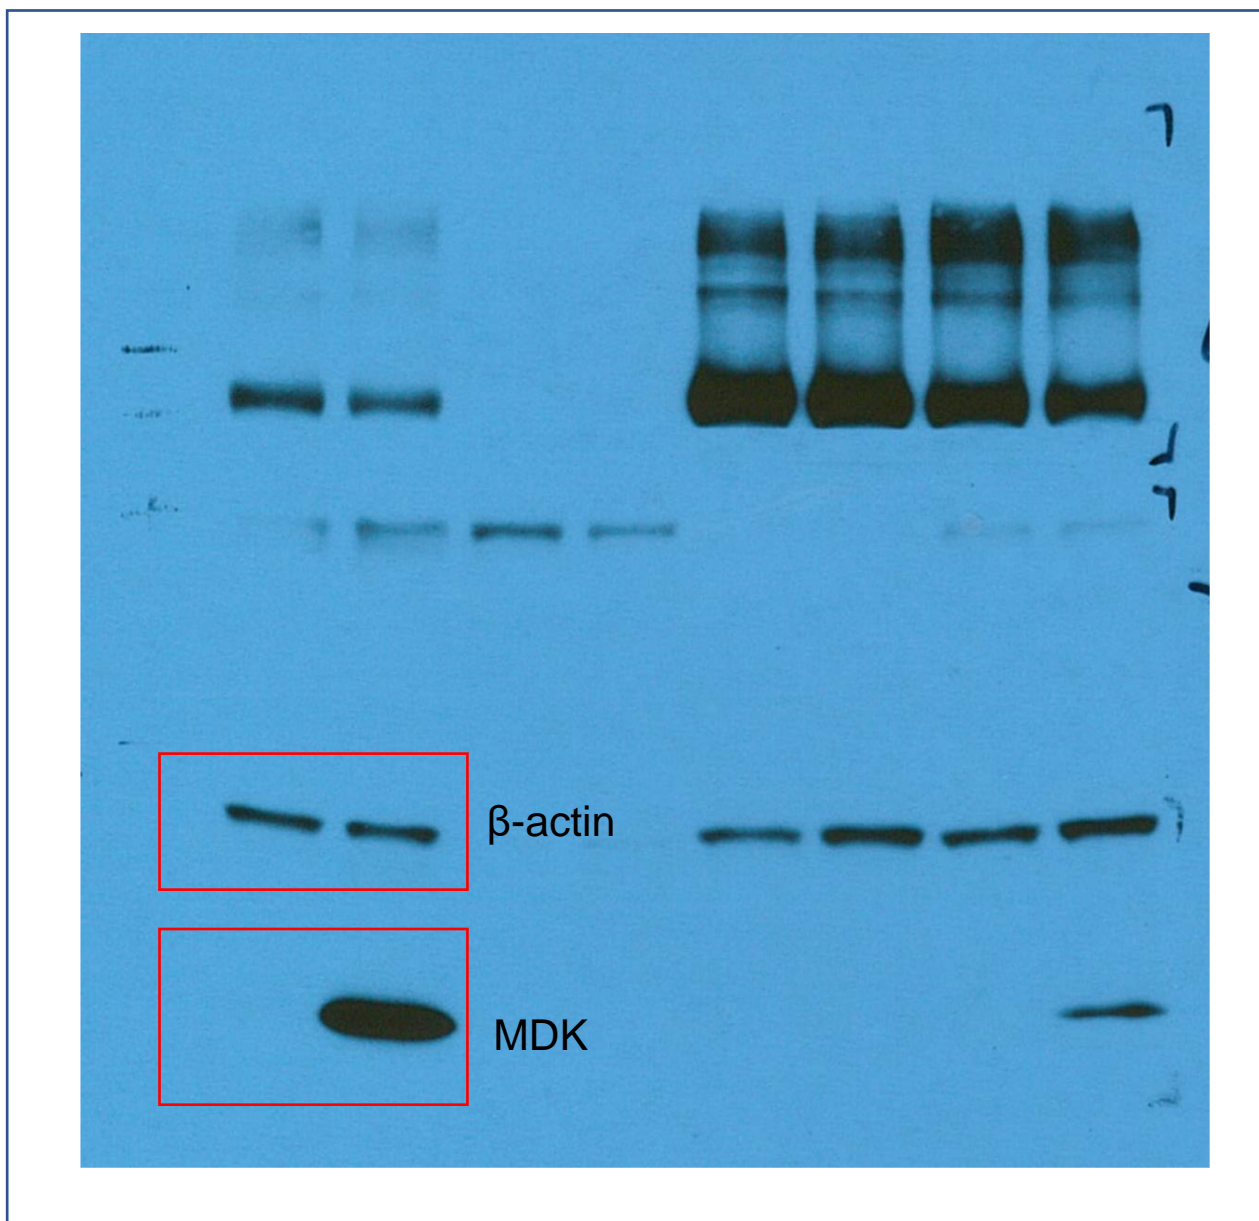

Supplemental Figure 5J

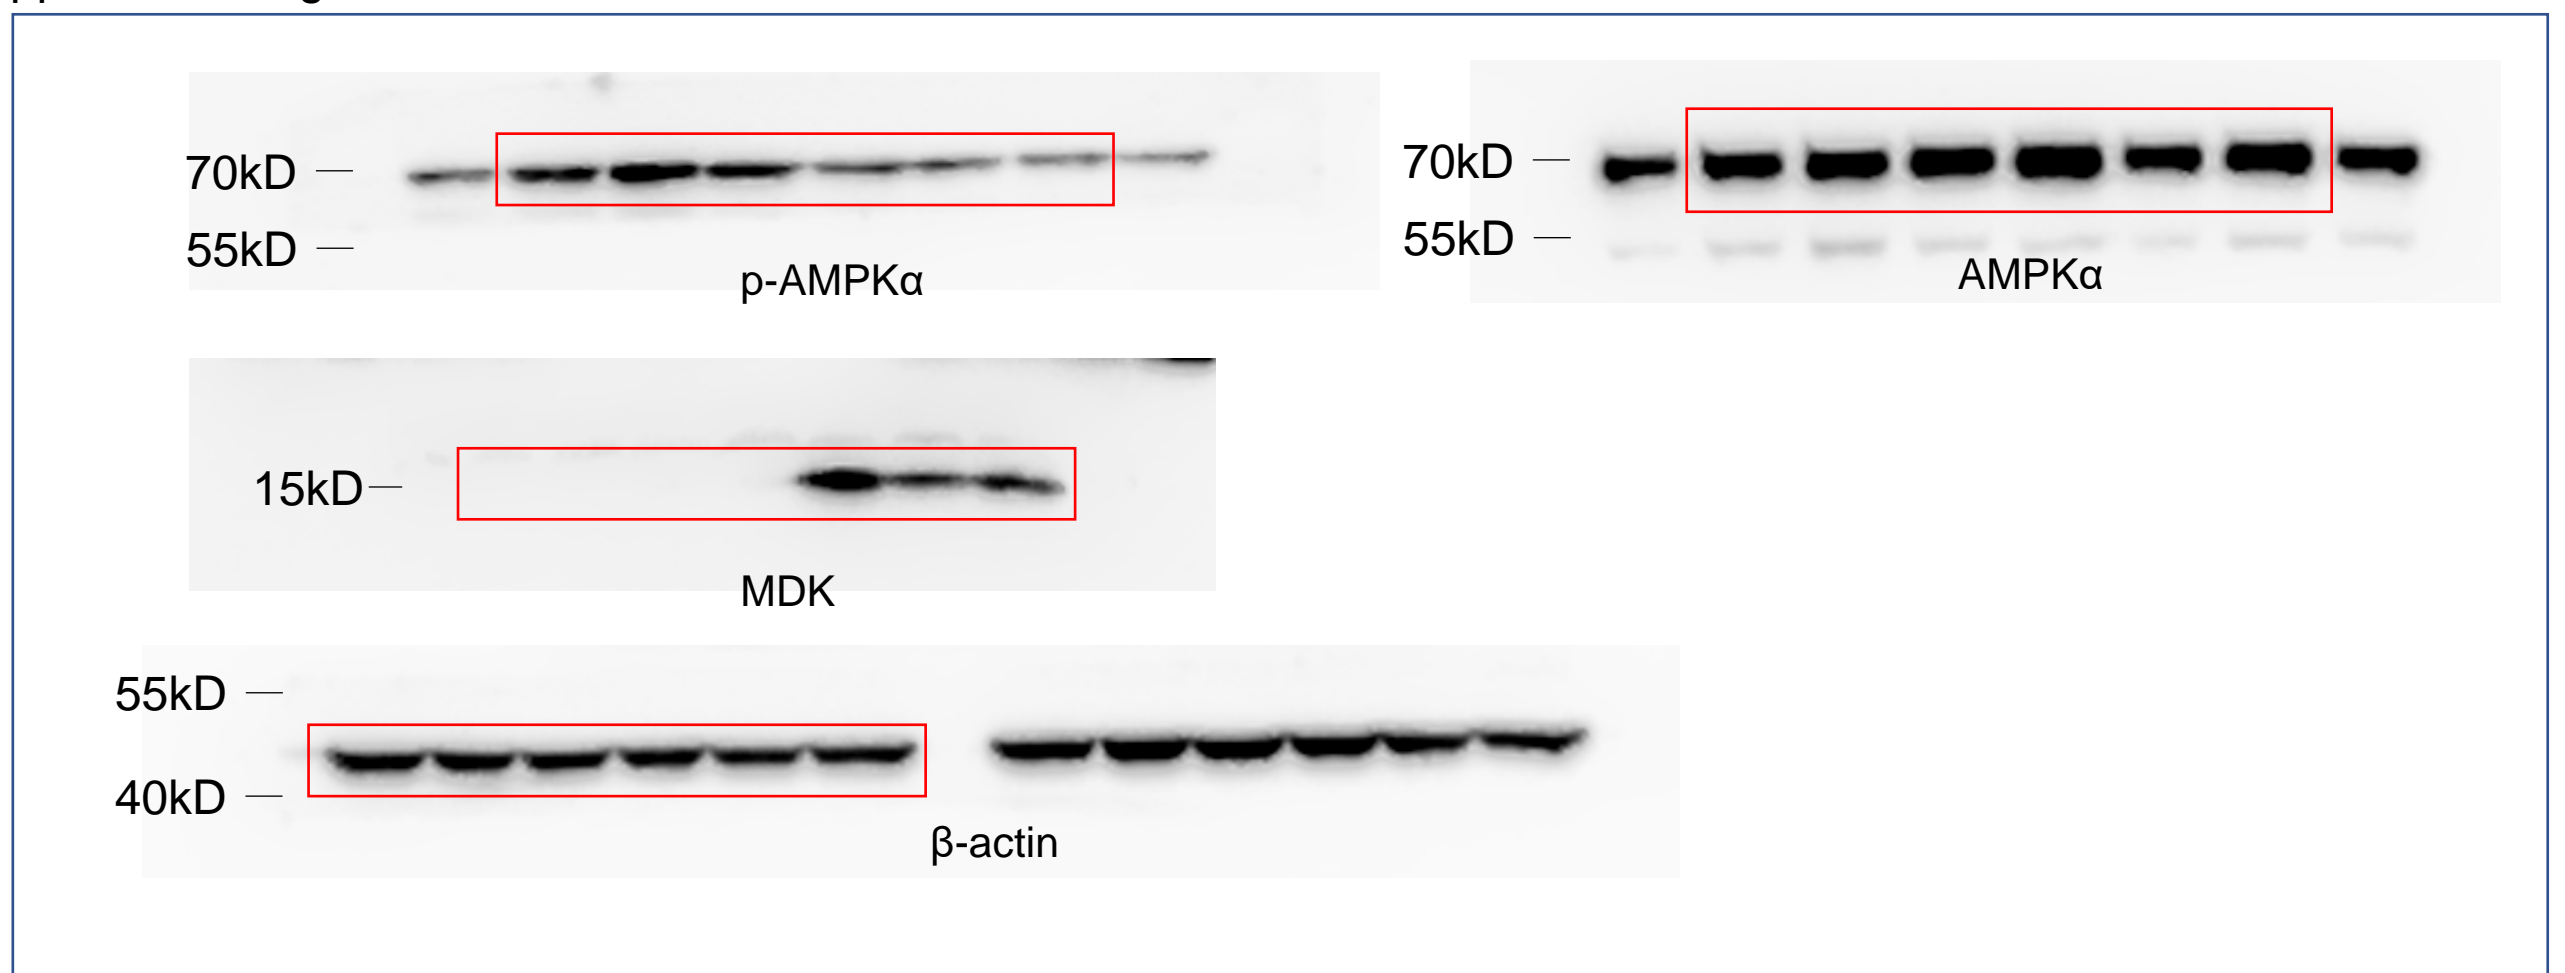

Supplemental Figure 6e

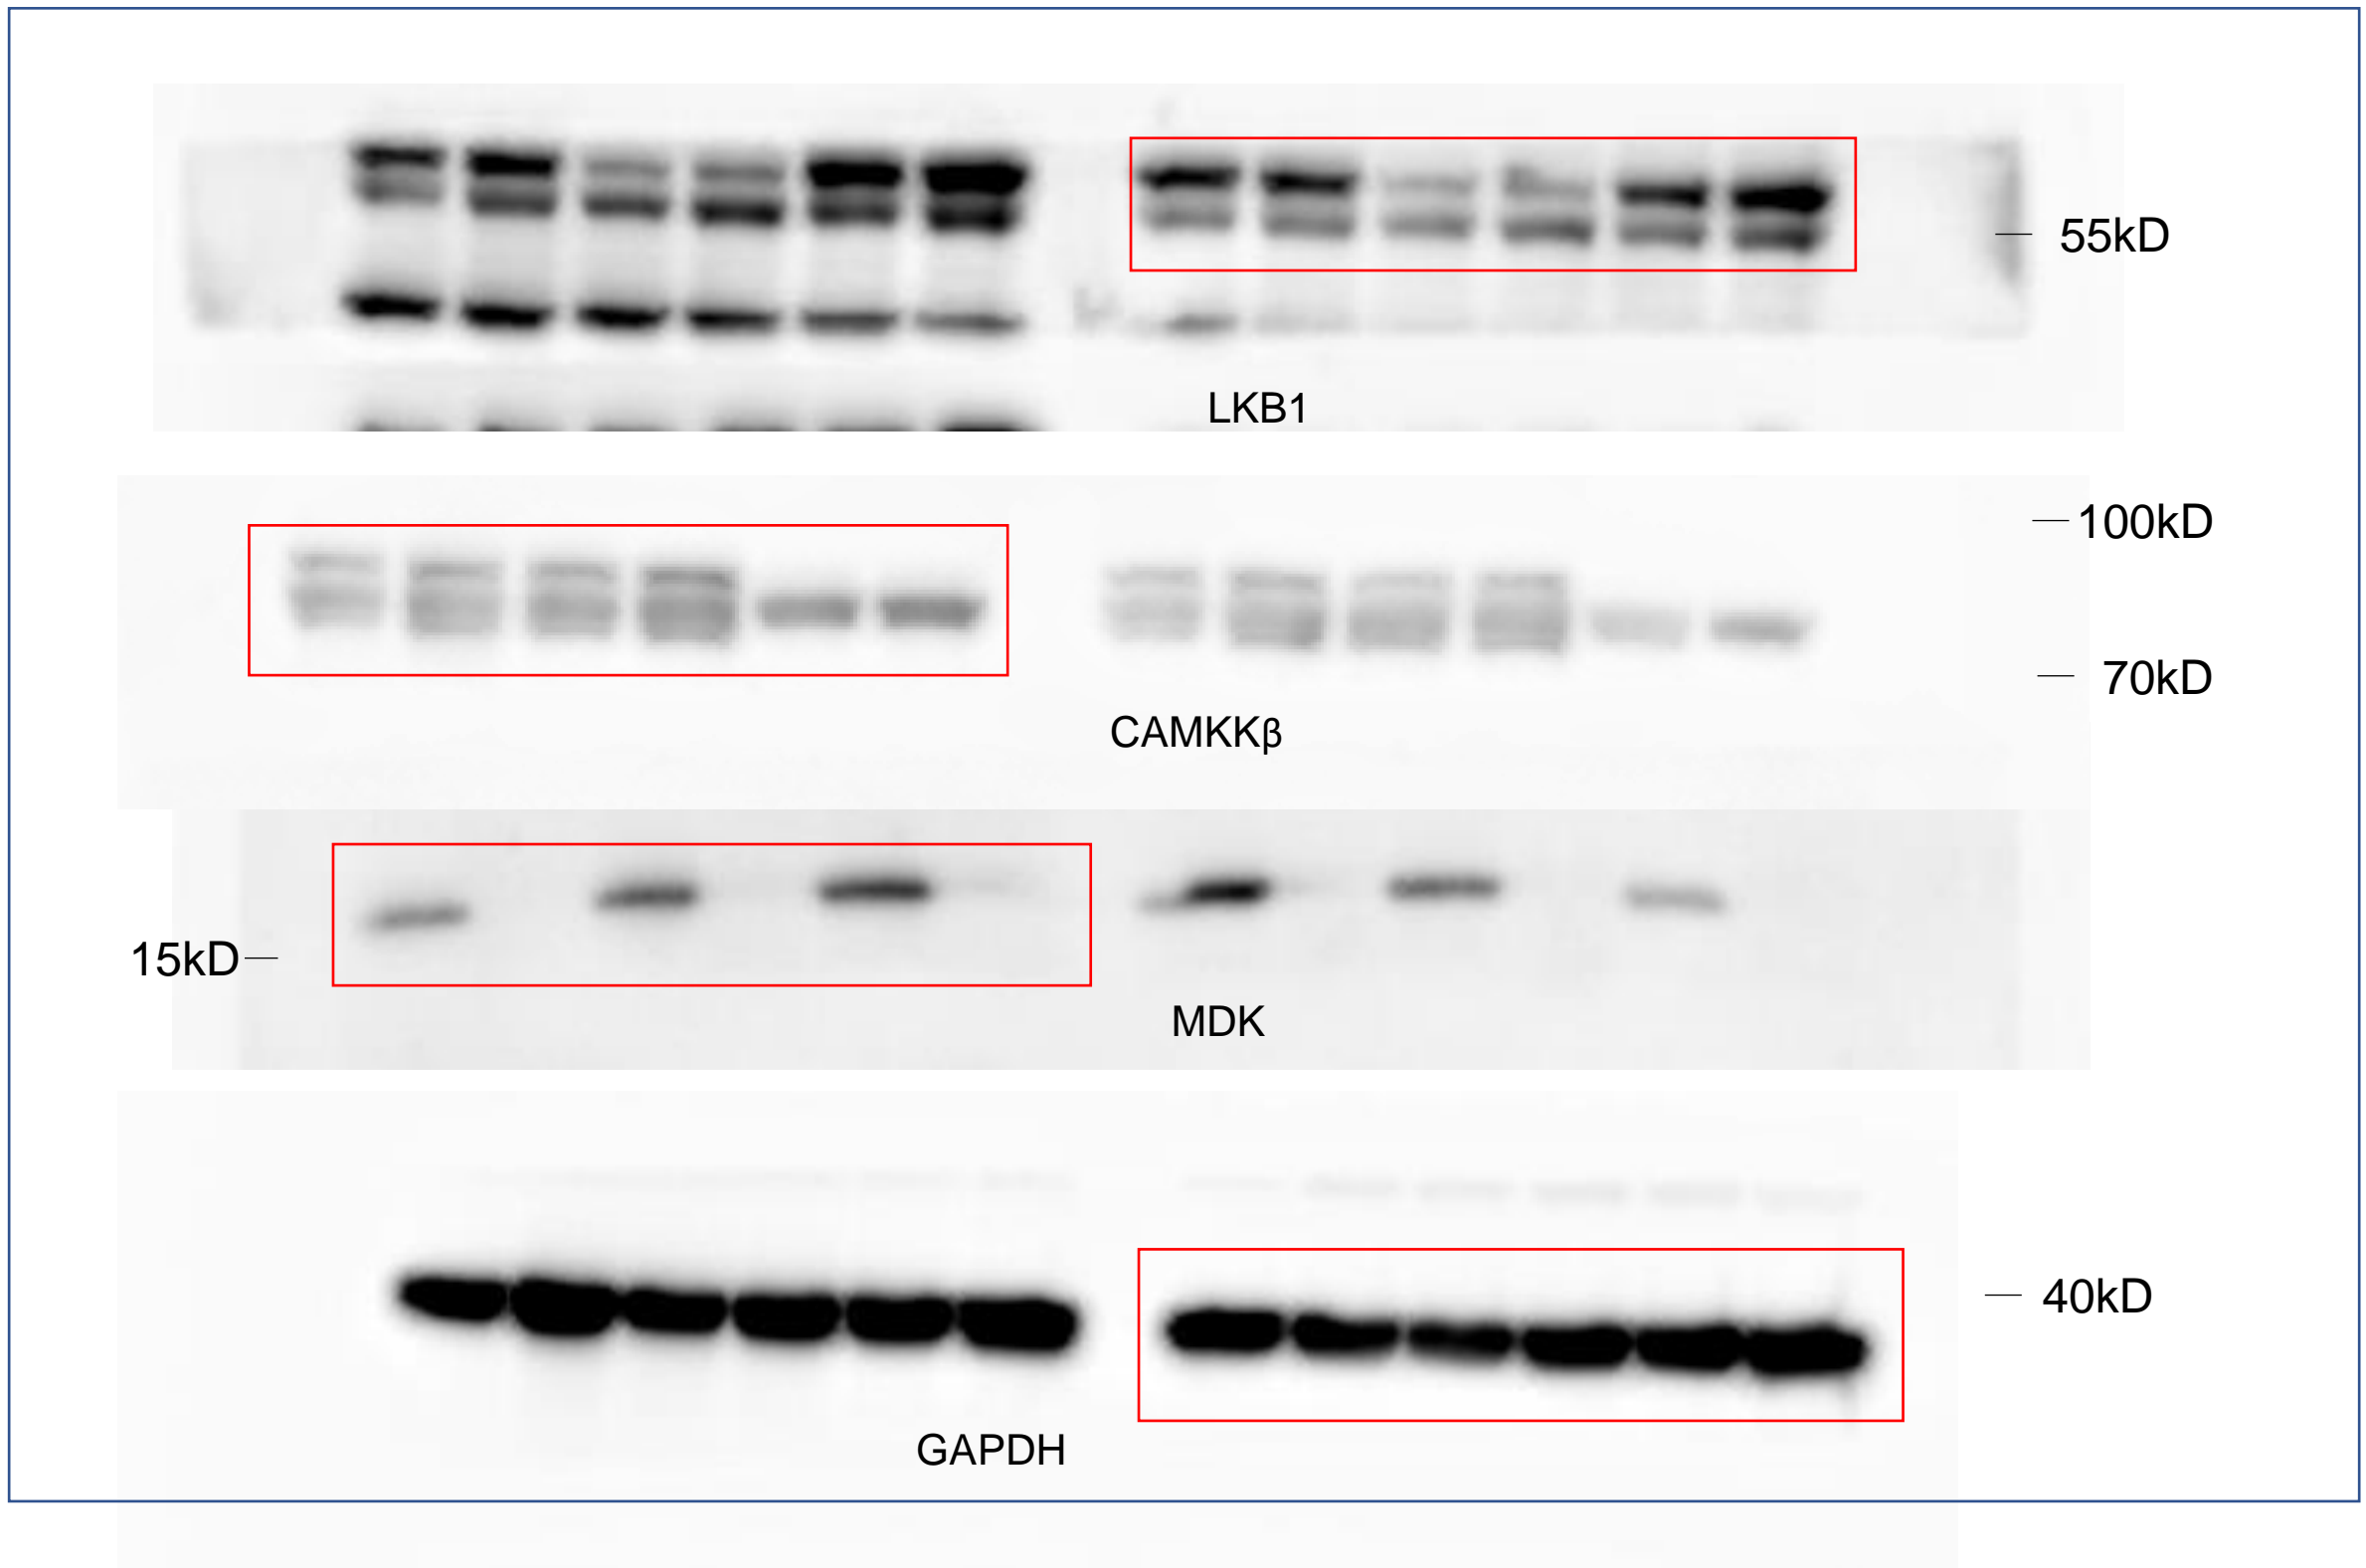

Supplemental Figure 6h

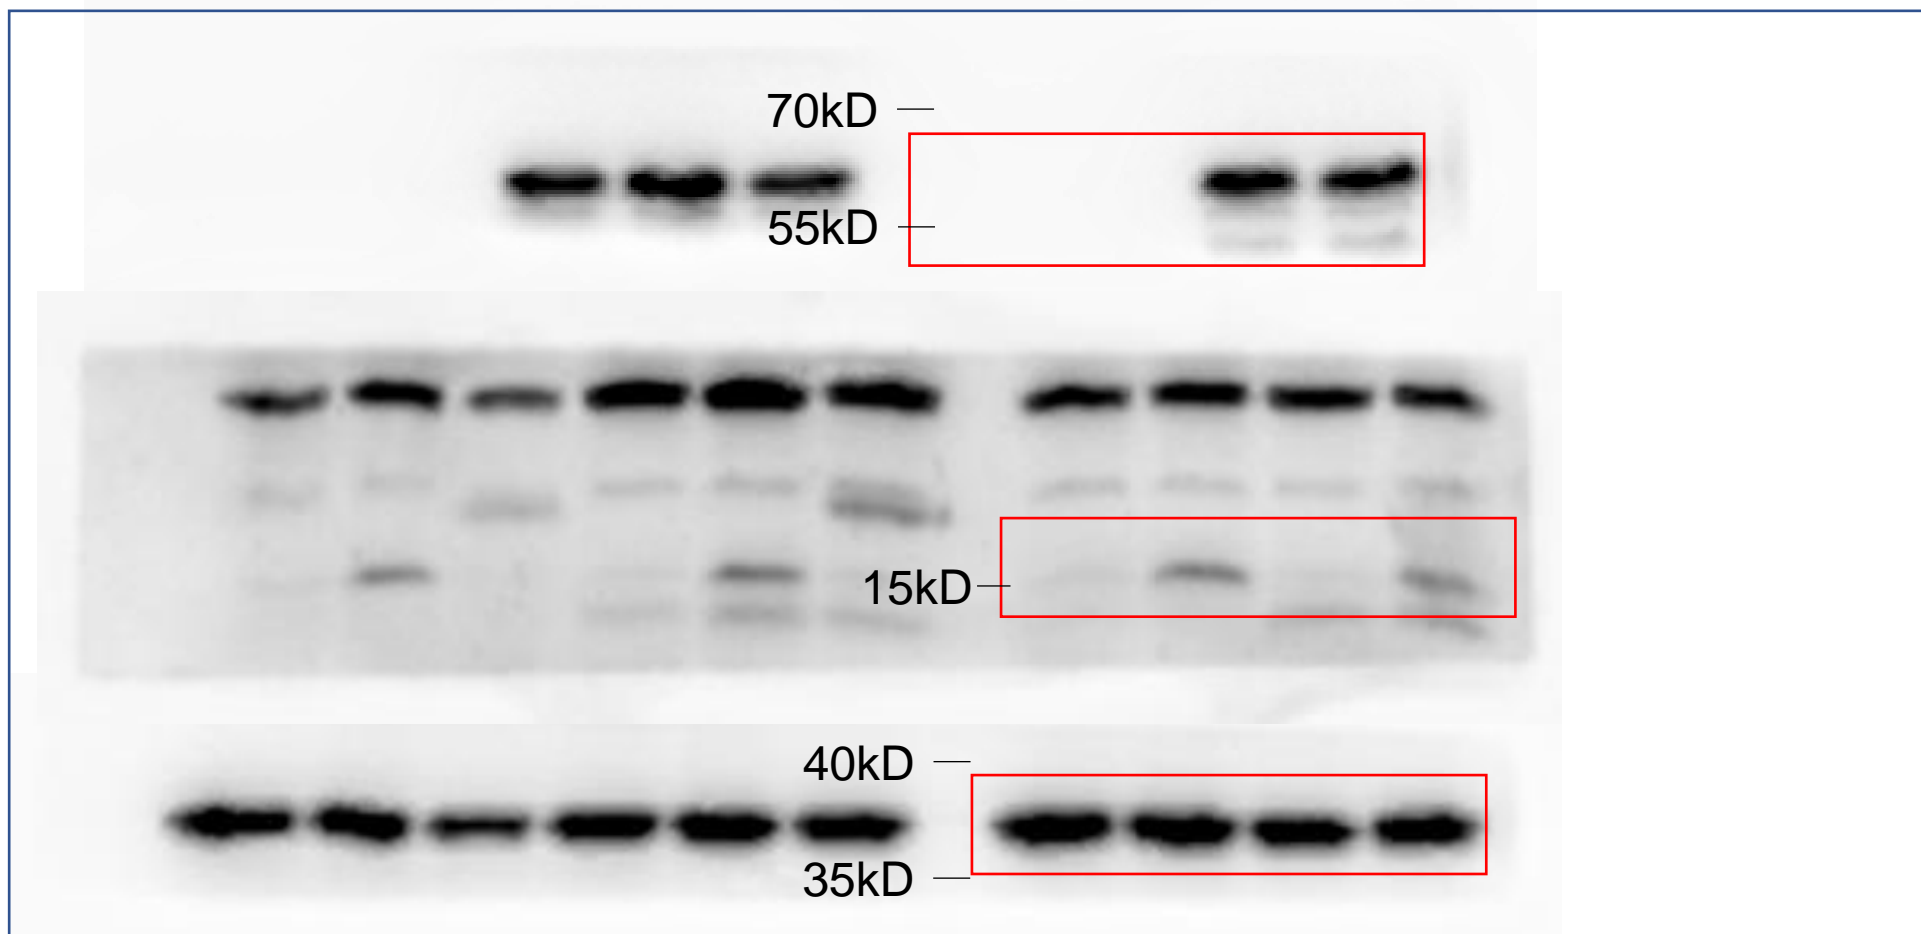

Supplement: 41419_2022_4801_MOESM9_ESM.pdf [file 41419_2022_4801_MOESM9_ESM.pdf]
