# Supplementary material for: Midkine noncanonically suppresses AMPK activation through disrupting the LKB1-STRAD-Mo25 complex
Source: PubMed Central journal article supplement (PMC9054788; doi:10.1038/s41419-022-04801-0), 2022-04-29
Supplement: 41419_2022_4801_MOESM1_ESM.pdf [file 41419_2022_4801_MOESM1_ESM.pdf]

## Supplementary Information

### **Midkine noncanonically suppresses AMPK activation through disrupting the LKB1-STRAD-Mo25 complex**

**Tian Xia<sup>1</sup>, Di Chen<sup>1</sup>, Xiaolong Liu<sup>1</sup>, Huan Qi<sup>1</sup>, Wen Wang<sup>1</sup>, Huan Chen<sup>1,4</sup>, Ting Ling<sup>1,4</sup>, Wuxiyar Otkur<sup>1</sup>, Chen-Song Zhang<sup>2</sup>, Jongchan Kim<sup>3</sup>, Sheng-Cai Lin<sup>2</sup> & Hai-long Piao<sup>1,4,\*</sup>**

<sup>1</sup>CAS Key Laboratory of Separation Science for Analytical Chemistry, Dalian Institute of Chemical Physics, Chinese Academy of Sciences, Dalian 116023, China.

<sup>2</sup>State Key Laboratory for Cellular Stress Biology, School of Life Sciences, Xiamen University, 361102 Fujian, China.

<sup>3</sup>Department of Life Sciences, Sogang University, Seoul 04107, Republic of Korea

<sup>4</sup>University of Chinese Academy of Sciences, Beijing 100049, China.

\*Correspondence: Hai-long Piao, [hpiao@dicp.ac.cn](mailto:hpiao@dicp.ac.cn)

## **Materials and Methods**

### **Cell lines and culture conditions**

The HCC cell lines were purchased from the cell bank of Committee on Type Culture Collection of the Chinese Academy of Sciences (CTCC, Shanghai, China). Immortalized human liver cell THLE-2 and breast cancer cells MCF10A, MCF7, T47D, BT549, MDA-MB-231, MDA-MB-157, MDA-MB-436, MDA-MB-468 were obtained from ATCC (American Type Culture Collection) and cultured under conditions specified by the provider. MHCC-97H MCF7, T47D, BT549 and A549 cell lines were maintained in RPMI 1640 medium (GIBCO, USA). 293T, Huh7, BEL-7402, Hep3B, HepG2, SMMC-7721, HCC-LM3 and MCF10A cells were cultured in DMEM medium (GIBCO, USA). MDA-MB-231, MDA-MB-157, MDA-MB-436, MDA-MB-468 cells were cultured in L15 medium (Gibco, USA). The medium was mixed with 10% FBS (GIBCO, USA) and 1% penicillin/streptomycin (Thermo) before use. THLE-2 cell line was cultured in bronchial epithelial cell growth medium (BEGM, Lonza/Clonetics Corporation, Walkersville) supplemented with 200 ng/ml epidermal growth factor (EGF), 500 ng/ml hydrocortisone, 100 ng/ml cholera toxin, 10 µg/ml insulin, 10% FBS and 1% P/S. All cells were cultured at 37°C with 5% CO<sub>2</sub> in a humidified incubator.

### **Constructs**

For transient transfection, MDK, MDK<sup>Del</sup>, AMPK $\alpha$ 1, AMPK $\beta$ 1, AMPK $\gamma$ 1, LKB1, CAMKK $\beta$ , full length and truncated LKB1 coding sequences were fused with HA, Flag or Myc tag sequence by PCR and then subcloned to pCDNA3.1 vector in appropriate restriction endonuclease sites. Otherwise, these coding sequences were subcloned to the entry vector pDONR201 using Gateway System of Invitrogen company, and then recombined into gateway-compatible destination vectors for the transient expression of native or SFB-tagged proteins.

For the stable expression of proteins and shRNAs in cells, lentivirus packaging system was used. Coding sequences of MDK, MDK<sup>Del</sup>, LKB1 and AMPK $\alpha$ 1 were subcloned to pLoc-RFP vector in appropriate restriction endonuclease sites, or recombined to gateway destination vectors. Lentiviral shRNAs were cloned in pLKO.1 within the

AgeI/EcoRI sites at the 3' end of the human U6 promoter. The targeted sequences were shown in the table above.

### **Transfection and Lentivirus infection**

HEK293T cells were used for transfection and lentivirus packaging. Plasmids and PEI (Polyethylenimine, Polysciences 24765) were mixed at 1:4 ratio (w/w) in Opti-MEM medium (Gibco), and then added to 293T cell medium. Protein expression was tested about 48 hours after transfection.

For lentivirus packaging, the protein or shRNA expressing lentivirus vectors were transfected into 293T cells together with packaging vectors psPAX2 and pVSVG using PEI. Virus containing medium was harvested 48 hours after transfection and filtered with 0.45  $\mu\text{m}$  membrane to remove cell debris, then the virus containing medium was used to culture target cells for 8-24 hours. Puromycin or blasticidine were used to screen positive cells, depending on the lentivirus vector resistant gene.

### **Cell proliferation and cloning formation assay**

For cell proliferation assay, cells (3000 per well) were seeded in 6-well or 12-well plates, then cultured under 37°C and 5% CO<sub>2</sub> condition. At each time point, cells were stained with crystal violet (0.1% w/v, in 10% methanol) for 1 hour at room temperature, then the cells were washed by PBS for 3 times to remove extra crystal violet. Finally, the crystal violet in stained cells was dissolved in 10% acetic acid, and the OD<sub>590</sub> value was measured.

For soft agar colony formation assay, cells (5000 per well) were suspended in medium containing 0.4% agar and overlaid on 0.7% agar in 6-well plates. Extra liquid medium was added on the surface of agar to keep top layer moist. The plates were incubated for 3 weeks in a 37 °C incubator, followed by crystal violet staining for 2 hours. After extra crystal violet was taken off by PBS, pictures of the cell colony were taken and the clone numbers were counted with the help of Image J.

### **Energy stress treatment**

For Western Blot assay, cells were seeded on 60 mm dishes 24 hours before treatment. After the cells adhered to dish bottom, the medium was vacuumed and completely removed by washing with PBS. After PBS was vacuumed, glucose deficient medium

or 2-DG (2-Deoxy-D-Glucose) containing medium was used to culture the cells. At the end of energy stress treatment, the medium was vacuumed, and cells were washed once with PBS. After PBS was removed, the dishes were immediately put in liquid nitrogen, then the cell protein was extracted and test by WB.

For 2-D colony formation assay, cells (500 per well) were seeded in 6-well plates. 24 hours after cell adherent, medium with normal or low concentration of glucose was applied to culture the cells for 2-3 weeks until visible colonies formed. Medium was replaced every 3 days. Finally, the cells were stained with crystal violet (0.1% w/v, in 10% methanol) for 1 hour at room temperature, then the cells were washed by PBS for 3 times to remove extra crystal violet. The colony numbers were counted with the help of Image J.

#### **Midkine conditioned medium treatment**

To obtain MDK conditioned medium, MHCC97H cells that stably expressed ectopic MDK were seeded in 100 mm dishes and cultured until they reached over 90% confluency. Then the cells were further cultured in fresh medium for 24 hours to make sure MDK secretion. Then the MDK containing medium was filtered with 0.22  $\mu\text{m}$  membrane to remove cell debris and used to incubate cells.

#### **Xenograft Studies**

The indicated cells ( $1 \times 10^6$ ) were suspended in 100  $\mu\text{l}$  PBS, and subcutaneously injected into flanks of male nude mice (Balb/c, 4-6 weeks old). Tumor size was measured every 2 or 3 days with a caliper and the tumor volume was determined using the formula:  $(\text{widest diameter} \times \text{smallest diameter}^2)/2$ . The mice were sacrificed at the end of the studies and the tumors were dissected and weighted, followed by keeping in liquid nitrogen for protein extraction.

#### **Clinical specimens**

36 pairs of HCC and normal liver tissue samples were obtained from the first affiliated hospital of Dalian Medical University. All samples were collected with the informed consent of the patients. The experiments were approved by Research ethics committee at the first affiliated hospital of Dalian Medical University. Human HCC Tissue Microarrays were purchased from SHANGHAI OUTDO BIOTECH Company.

### **Immunoblotting assay**

Cells were scraped from plates and lysed in RIPA buffer [50 mM Tris-Cl (PH7.4), 150 mM NaCl, 1 mM EDTA (PH8.0), 0.25% DOC (deoxycholic acid), 10% glycerol, 1% Nonidet P40 and 1% Triton-X100] supplemented with protease inhibitors (Bimake) and phosphatase inhibitors (Bimake). The cell lysates were clarified by centrifugation at 13000 r.p.m. for 15 min at 4 °C. The protein samples from tumors were homogenized with glass beads and then lysed in RIPA buffer with protease/phosphatase inhibitors. The protein concentrations of the lysates were measured using EASY II Protein Quantitative Kit (Transgene). SDS-PAGE was performed for equal amounts of protein per sample, followed by transfer to a PVDF membrane (Millipore). Then the proteins on the PVDF membrane were immunoblotted with indicated antibodies listed in the Extended Method Table.

### **Immunoprecipitation and S-protein pull down**

Cells were scraped from dishes and lysed with NETN buffer [20 mM Tris-Cl (PH8.0), 100 mM NaCl, 1 mM EDTA (PH8.0), 0.5% Nonidet P40] containing protease and phosphatase inhibitors. The cell lysates were clarified by centrifugation at 13000 r.p.m. for 15 min at 4 °C.

For immunoprecipitation, the cell lysate was pre-cleared with normal IgG which had been bound to Protein A/G Agarose (Thermo) or Protein A/G magnetic Beads (Bimake) for 1 hour at room temperature. The pre-cleared cell lysate was then incubated with indicated antibodies which had been bound to Protein A/G Agarose or Protein A/G magnetic Beads for 1 hour at room temperature. After incubating with the cell lysate, the IgG/antibody bound Protein A/G agarose or magnetic beads were washed 4 times with NETN buffer to remove non-specific binding proteins. Then 1 X SDS-PAGE Loading buffer was added to the Protein A/G agarose or magnetic beads. Subsequently Western Blots were performed as described above.

For S-protein pull down, cell lysates were incubated with S-protein agarose (Millipore) at 4 °C for 4 hours. Then the agarose was washed 4 times with NETN, followed by adding 1 X SDS-PAGE Loading buffer and being tested by Western Blot.

### **RNA isolation and Q-RT-PCR**

RNA of cell samples was isolated with RNAiso Plus reagent (TaKaRa). The concentrations of RNA were determined with NanoDrop (Thermo). Reverse transcription PCR was performed using PrimeScript™ RT Master Mix (TaKaRa) to obtain cDNA as template for Q-RT-PCR. Q-RT-PCR was performed using StepOnePlus and the DNA double-strand-specific reagent SYBR-Green I for detection (Roche) in the CFX-96 instrument (Bio-Rad). Primers for Midkine transcript detection were as followed:

F: 5'-GACCATCCGCGTCACCA-3'

R: 5'-TCCAGGCTTGGCGTCTAGTC-3'

### **Immunohistochemistry**

The samples were fixed with 4% PFA, and embedded with paraffin. Standard IHC staining procedures were performed according to the instructions of IHC Kit. MDK (1:50) and p-AMPK $\alpha$  Thr172 (1:100) were used as the primary antibodies. EDTA and Citrate solution were used for antigen retrieval depend on antibody instruction. H-score was used to assess the staining intensity.

### **Cell invasion and migration ability assay**

Cell invasion ability test was performed using Transwell plate coated with Matrigel (BD) according to the manufacture's instructions. Briefly, after serum starvation overnight, cells ( $2 \times 10^5$  per well) were seeded in Transwell Matrigel plate and incubated for 30 hours. Finally, the invasive cells were visualized by crystal violet staining. Photograph of the invaded cells were taken by microscope and analyzed by Image J.

Wound healing assay was used to test cell migration abilities. Cells ( $1 \times 10^6$  per well) were seeded in 6-well plates. After the cells reached approximate 98% confluency, they were cultured in serum free medium containing Mitomycin ( $4 \mu\text{g/ml}$ ) for 6 hours to postpone cell proliferation. Next, the cells were scratched with a sterile  $10 \mu\text{l}$  pipette tip and incubated in fresh serum-free media after the cell debris was removed by PBS. The width of gap was photographed and measured at the indicated time points with Image J.

### **Statistical analysis**

Data representative of two or more independent experiments. Statistical analysis was

performed using Student's *t*-test (unpaired, two-tailed) to compare two groups of independent samples, and a difference with P value <0.05 was considered statistically significant. Bars and error represent mean  $\pm$  standard deviations (SD) of replicate measurements. All of the relative protein expression was normalized by ImageJ (1.51j8). The survival curve was achieved using Kaplan Meier estimator. The correlation analysis between MDK and p-AMPK $\alpha$  was performed with Pearson Correlation Coefficient. The detailed methods for TCGA data analysis and pathway enrichment were presented in the Computational analysis part below.

### **Computational analysis**

**TCGA and HPM data:** The normalized RNA-seq data together with clinical survival information in TCGA (1) were downloaded by the TCGAbiolinks R package (2). The expression matrix for each cancer type was further transformed by the voom algorithm in the limma R package (3). The human proteome map (HPM) (4) protein level expression data were downloaded from <http://www.humanproteomemap.org/download.php>.

**Survival analysis:** For a single gene, patients were separated into two groups with expressions higher or lower than the median expression of the gene, then we utilized the log-rank test to compare the overall survival time between groups, and survival curves were created based on Kaplan Meier estimator. For two items (*MDK* and *PRKAA1* or AMPK), patients were separated into four groups according to the expressions of two items-“HH” group: both items are high, “HL” group: the first one was high, while the other was low, “LH” group: the first one was low while the other was high, “LL” group: both were low. To determine whether the inverse correlations between MDK and AMPK can cooperatively impact the prognosis, we utilized the log-rank test to compare the overall survival time between “HL” and “LH” groups, and survival curves were created based on Kaplan Meier estimator.

**Pathway enrichment analysis:** Initially, we calculated the Pearson correlation coefficients between MDK and all other genes according to their mRNA expression levels in the RNA-seq datasets. The genes with absolute values of Pearson correlation coefficients larger than threshold were considered as MDK correlated genes. Then, we

utilized Fisher-Exact to examine the overlap significance between MDK correlated genes and pathway genes. Furthermore, to obtain a genome-wide perspective of MDK impacts on pathways, we also ranked all the genes in the RNA-seq data based on the Pearson correlation coefficients and utilized the ranked genome-wide gene list as the input of the GSEA software (5), and performed GSEA-based pathway enrichment. Pathway genes were obtained from Kyoto Encyclopedia of Genes and Genomes (KEGG) (6), <https://www.kegg.jp/>.

**Disease enrichment analysis:** We calculated the Pearson correlation coefficients between MDK and all other proteins according to their protein expression levels in the HPM dataset. The proteins with absolute values of Pearson correlation coefficients larger than threshold were considered as MDK correlated. Then, we utilized Fisher-Exact to examine the overlap significance between MDK correlated proteins and pathway genes. Disease genes were obtained from Online Mendelian Inheritance in Man (OMIM) (7), <https://omim.org/>.

**AMPK activity estimation:** The AMPK activity was derived by performing principal component analysis on the gene expression data of 33 AMPK downstream genes (e.g., ACADL, ACADM, ACOX1, ACSL1, etc.), and the first principal component was used to quantify the activity of AMPK (8).

## Reference

1. Cancer Genome Atlas Research N, Weinstein JN, Collisson EA, Mills GB, Shaw KR, Ozenberger BA, et al. The Cancer Genome Atlas Pan-Cancer analysis project. *Nature genetics*. 2013;45(10):1113-20.
2. Colaprico A, Silva TC, Olsen C, Garofano L, Cava C, Garolini D, et al. TCGAAbiolinks: an R/Bioconductor package for integrative analysis of TCGA data. *Nucleic Acids Res*. 2016;44(8):e71.
3. Law CW, Chen Y, Shi W, Smyth GK. voom: Precision weights unlock linear model analysis tools for RNA-seq read counts. *Genome Biol*. 2014;15(2):R29.
4. Kim MS, Pinto SM, Getnet D, Nirujogi RS, Manda SS, Chaerkady R, et al. A draft map of the human proteome. *Nature*. 2014;509(7502):575-81.
5. Subramanian A, Tamayo P, Mootha VK, Mukherjee S, Ebert BL, Gillette MA, et al. Gene set enrichment analysis: a knowledge-based approach for interpreting genome-wide expression profiles. *Proc Natl Acad Sci U S A*. 2005;102(43):15545-50.
6. Kanehisa M, Furumichi M, Tanabe M, Sato Y, Morishima K. KEGG: new perspectives on genomes, pathways, diseases and drugs. *Nucleic Acids Res*. 2017;45(D1):D353-D61.
7. Hamosh A, Scott AF, Amberger JS, Bocchini CA, McKusick VA. Online Mendelian Inheritance in Man



(OMIM), a knowledgebase of human genes and genetic disorders. *Nucleic Acids Res.* 2005;33(Database issue):D514-7.

8. Yu L, Lu M, Jia D, Ma J, Ben-Jacob E, Levine H, et al. Modeling the Genetic Regulation of Cancer Metabolism: Interplay between Glycolysis and Oxidative Phosphorylation. *Cancer research.* 2017;77(7):1564-74.

## Supplementary Figures

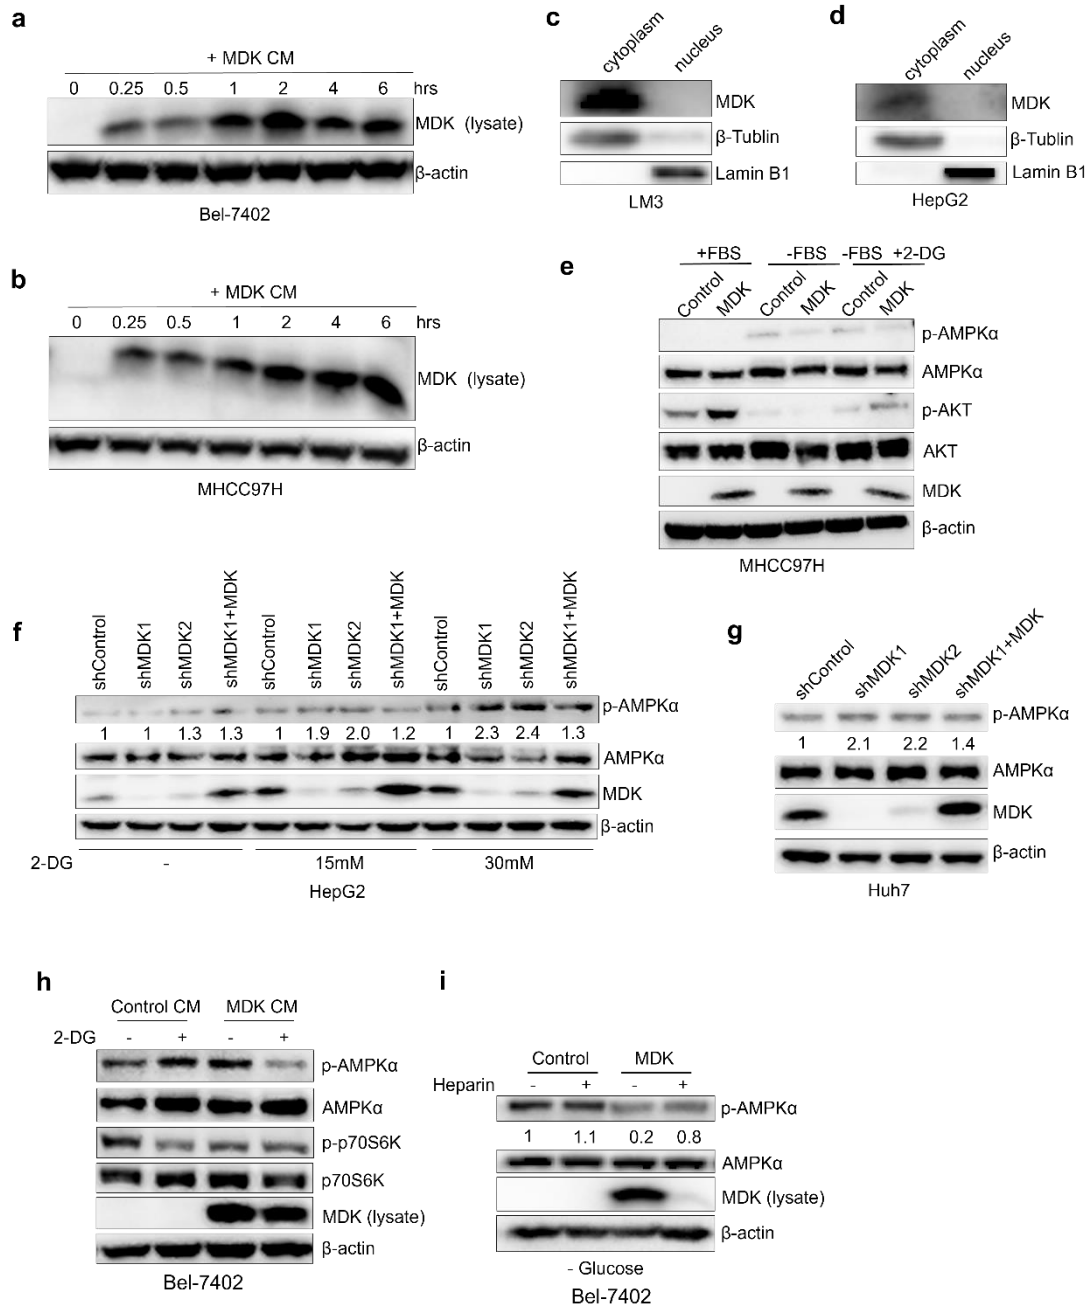

### Supplementary Figure 1 | Midkine suppresses AMPK activation in an intracellular localization-dependent manner

**a and b.** Western blotting of MDK and  $\beta$ -actin in Bel-7402 (a) and MHCC97H (b) cells at different time points during CM treatment. CM from MDK-overexpressing MHCC97H cells.

**c and d.** Immunoblotting demonstrates the MDK distribution in the cytoplasm and

nuclear of of HCCLM3 (c) and HepG2 (d) cells.

**e.** Immunoblotting shows that MDK suppresses p-AMPK $\alpha$  phosphorylation in MHCC97H cells treated with FBS deprivation and combined with 10 mM 2DG for 2 hours.

**f.** MDK knocked-down HepG2 cells with two independent MDK shRNAs and the reconstituted MDK-knockdown cells , accompanied with the control cells were treated with different concentrations of 2DG (0 mM, 15 mM and 30 mM) treatment, the cell lysate was subjected to western blotting.

**g.** MDK expression ia negatively correlated to p-AMPK $\alpha$  Thr172 level in the Huh7 cells transduced with two independent MDK shRNAs and the reconstituted MDK-knockdown cells.

**h.** Immunoblotting of the Bel-7402 cells being subjected to a combination treatment with or without MDK CM and 10 mM 2-DG for 2 hours.

**i.** MDK overexpressing Bel-7402 cells and control cells was treated with or without heparin treatment under glucose starvation conditions for 2 hours, then western blotting was performed to detect the indicated proteins.

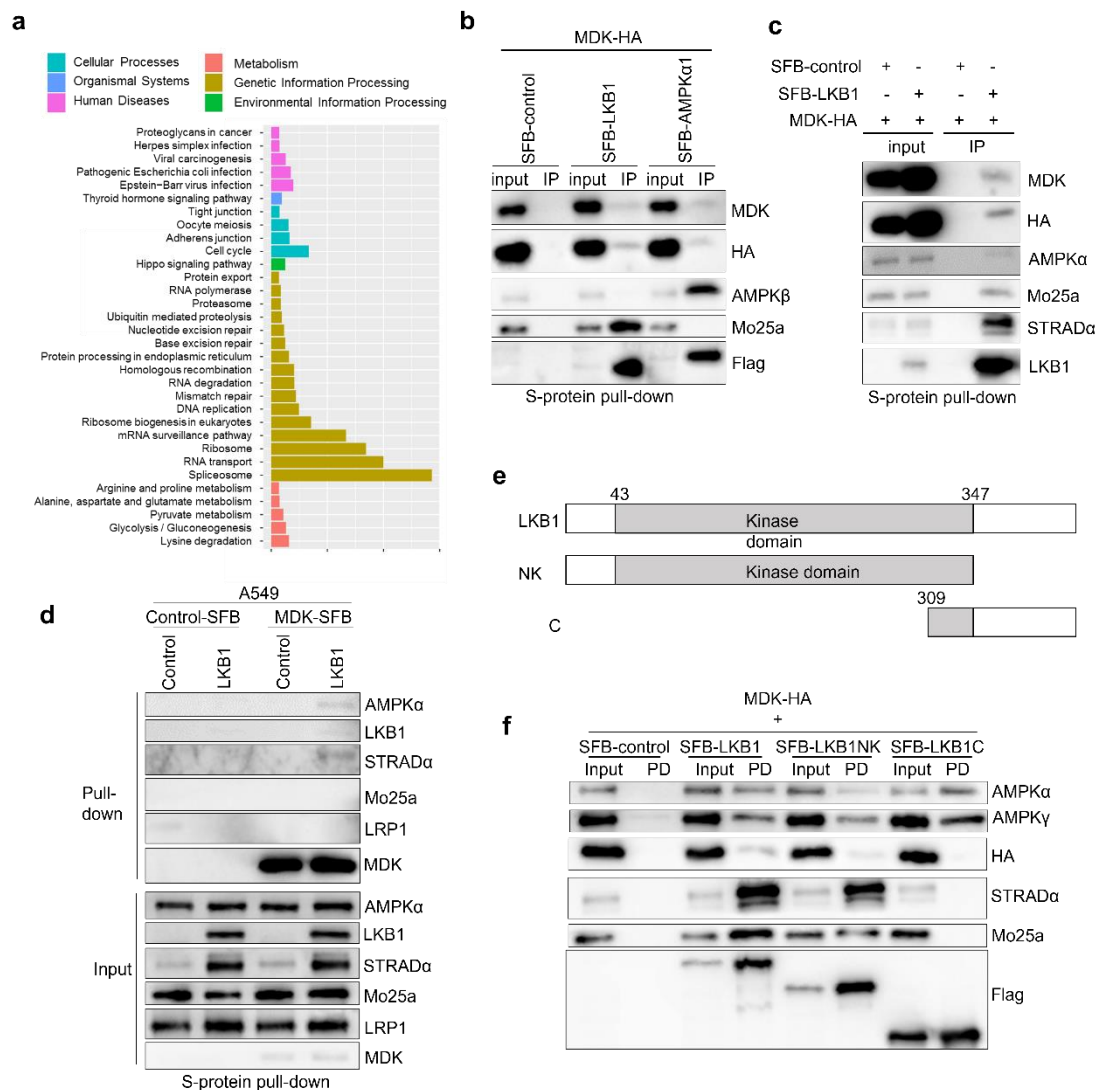

## Supplementary Figure 2 | Midkine associates with AMPK subunits and its upstream regulating factors

**a.** Pathway enrichment of MDK-interacting proteins. The bar length is proportional to  $-\log_{10}(P)$  (Fisher-Exact test). Different colors represent different pathway categories.

**b and c.** MDK associates with LKB1 and AMPK subunits. The indicated constructs were expressed in HEK293T cells for 24 hours, and the cell lysates were subjected to pull-down assays with S protein beads.

**d.** MDK from A549 cells transduced with LKB1 was pulled down with S protein beads and the control cells and subjected to Western blot analysis with antibodies against AMPK $\alpha$ , LKB1, Mo25a, STRAD $\alpha$ , LRP1 and MDK.

**e and f.** HEK293T cells were cotransfected with MDK-HA and SFB-tagged full-length

LKB1 or the LKB1-NK fragment or LKB1-C fragment, purified with S protein beads and subjected to Western blot analysis with antibodies against AMPK $\alpha$ , AMPK $\gamma$ , HA, STRAD $\alpha$ , Mo25a and FLAG.

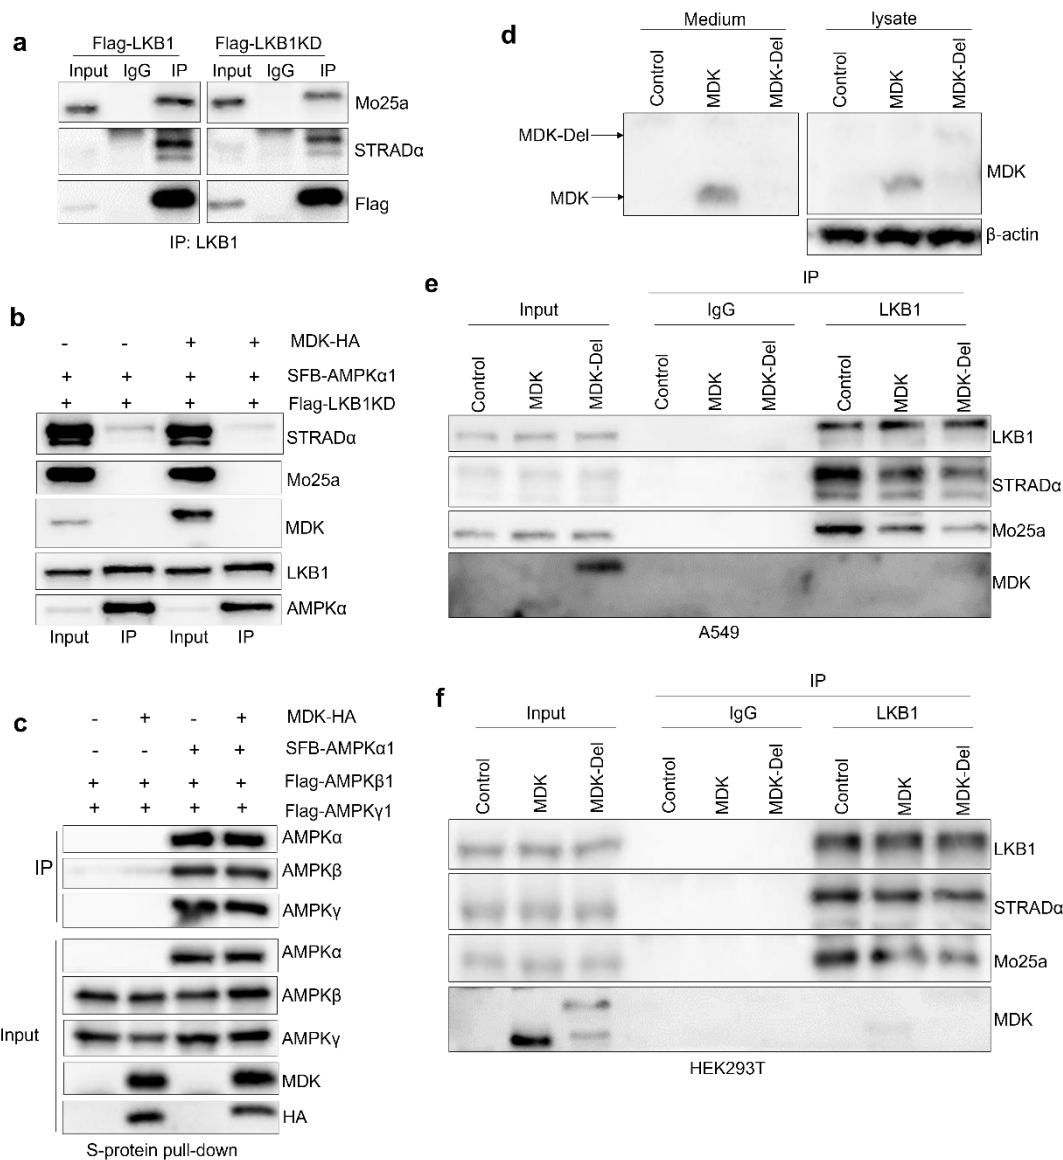

### Supplementary Figure 3 | Midkine depolymerized LKB1-STRAD-Mo25 complex

**a.** HEK293T cells were transfected with FLAG-tagged LKB1 or FLAG-tagged LKB1-KD and coimmunoprecipitated with primary LKB1 or IgG antibodies and then subjected to Western blot analysis with antibodies against STRAD $\alpha$ , Mo25a, and FLAG.

**b.** HEK293T cells were cotransfected with FLAG-tagged LKB1-KD and SFB-tagged AMPK $\alpha$ 1 with or without MDK-HA and coimmunoprecipitated with FLAG primary antibody and the subjected to Western blot analysis with antibodies against STRAD $\alpha$ , Mo25a, MDK, LKB1 and AMPK $\alpha$ .

**c.** MDK associates with AMPK subunits through AMPK $\alpha$ . The indicated constructs

were expressed in HEK293T cells for 24 hours, and the cell lysates were subjected to pull-down assays with S protein beads.

**d.** MDK and MDK-Del were expressed in HEK293T cells, and the expression of MDK in cell lysate and medium was tested by Western Blot.

**e and f.** MDK and MDK-Del were expressed in A549 (e) and HEK293T (f) cells, coimmunoprecipitation was performed using LKB1 primary antibody. The interactions between LKB1 with MDK, STRAD and Mo25 were tested by Western Blot.

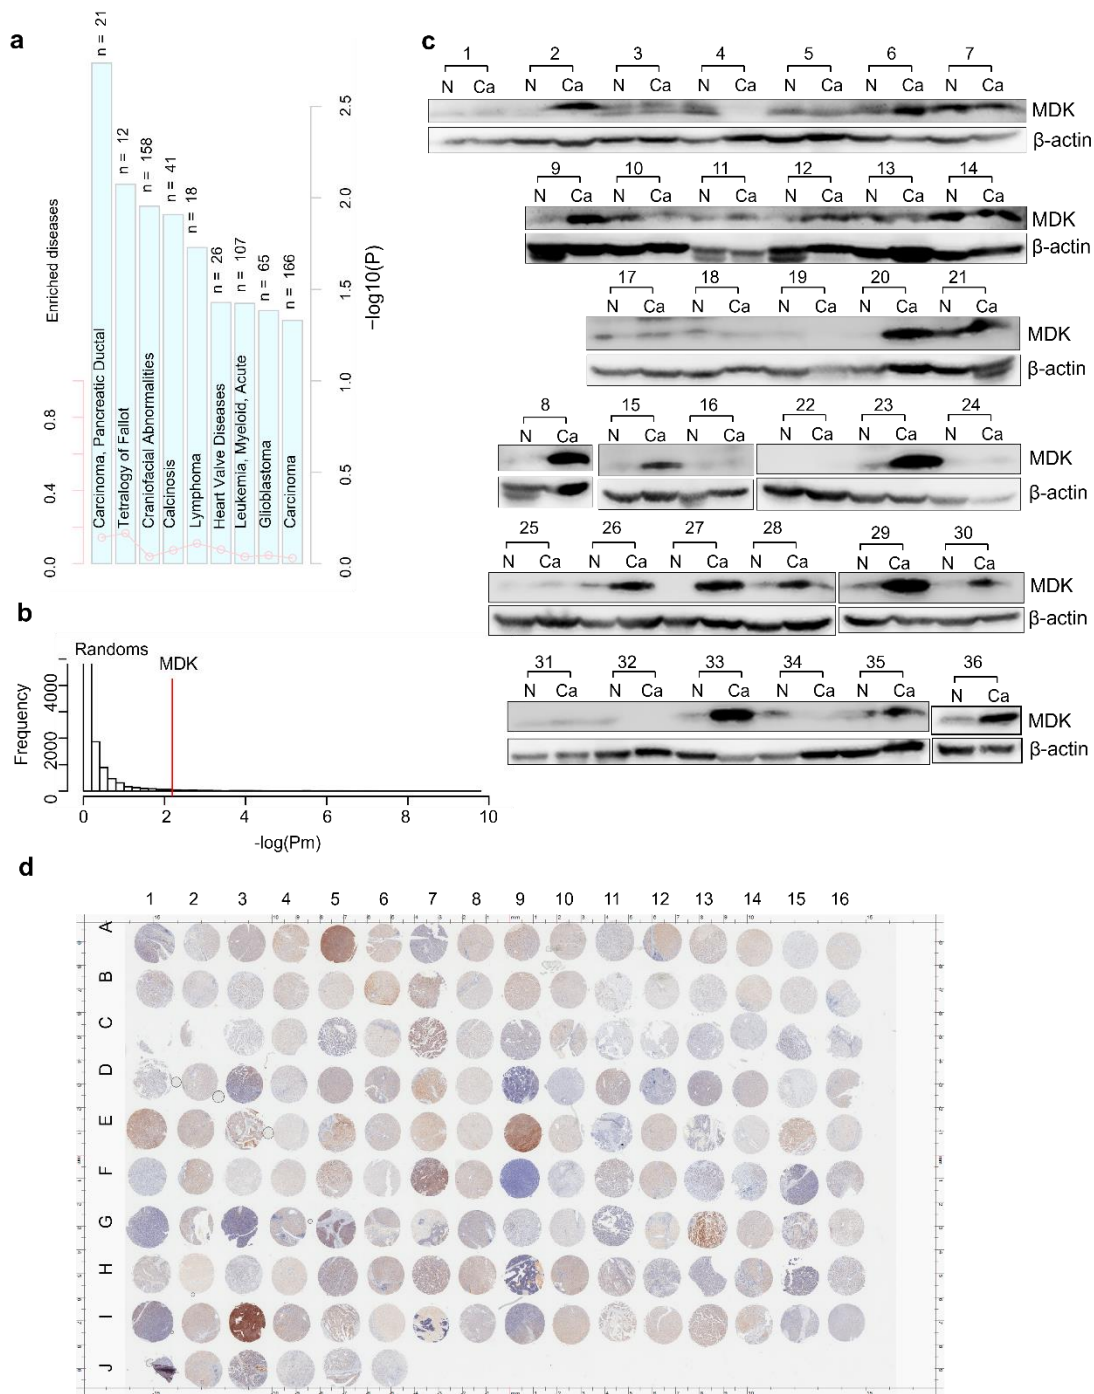

### Supplementary Figure 4 | Midkine expression is upregulated in cancer

**a.** Enrichment of MDK-correlated proteins in diseases. The MDK-correlated proteins were identified based on the human proteome map (HPM) protein expression dataset (Spearman correlation test, absolute value of correlation coefficient > 0.6). The overlap of the MDK-correlated proteins and disease genes was assessed by Fisher's exact test; the bar length is proportional to the corresponding  $-\log_{10}(P)$ ; and the point position



indicates the ratio of overlapping genes to disease genes.

**b.** A bar plot showing the distribution of the maximum P-value ( $P_m$ ) of 10000 randomly selected genes considering the gene expression differences in the tumor and normal tissues of eight cancer types. The  $P_m$  is transformed by  $-\log_{10}$ . The red line annotates the corresponding results for MDK.

**c.** The expression of MDK in 36 pairs of matched adjacent nontumor (NT) and cancer (Ca) tissues was detected by Western blot analysis.

**d.** Immunohistochemical staining shows the MDK expression status in 75 pairs of paraffin-embedded adjacent nontumor and cancer tissues.

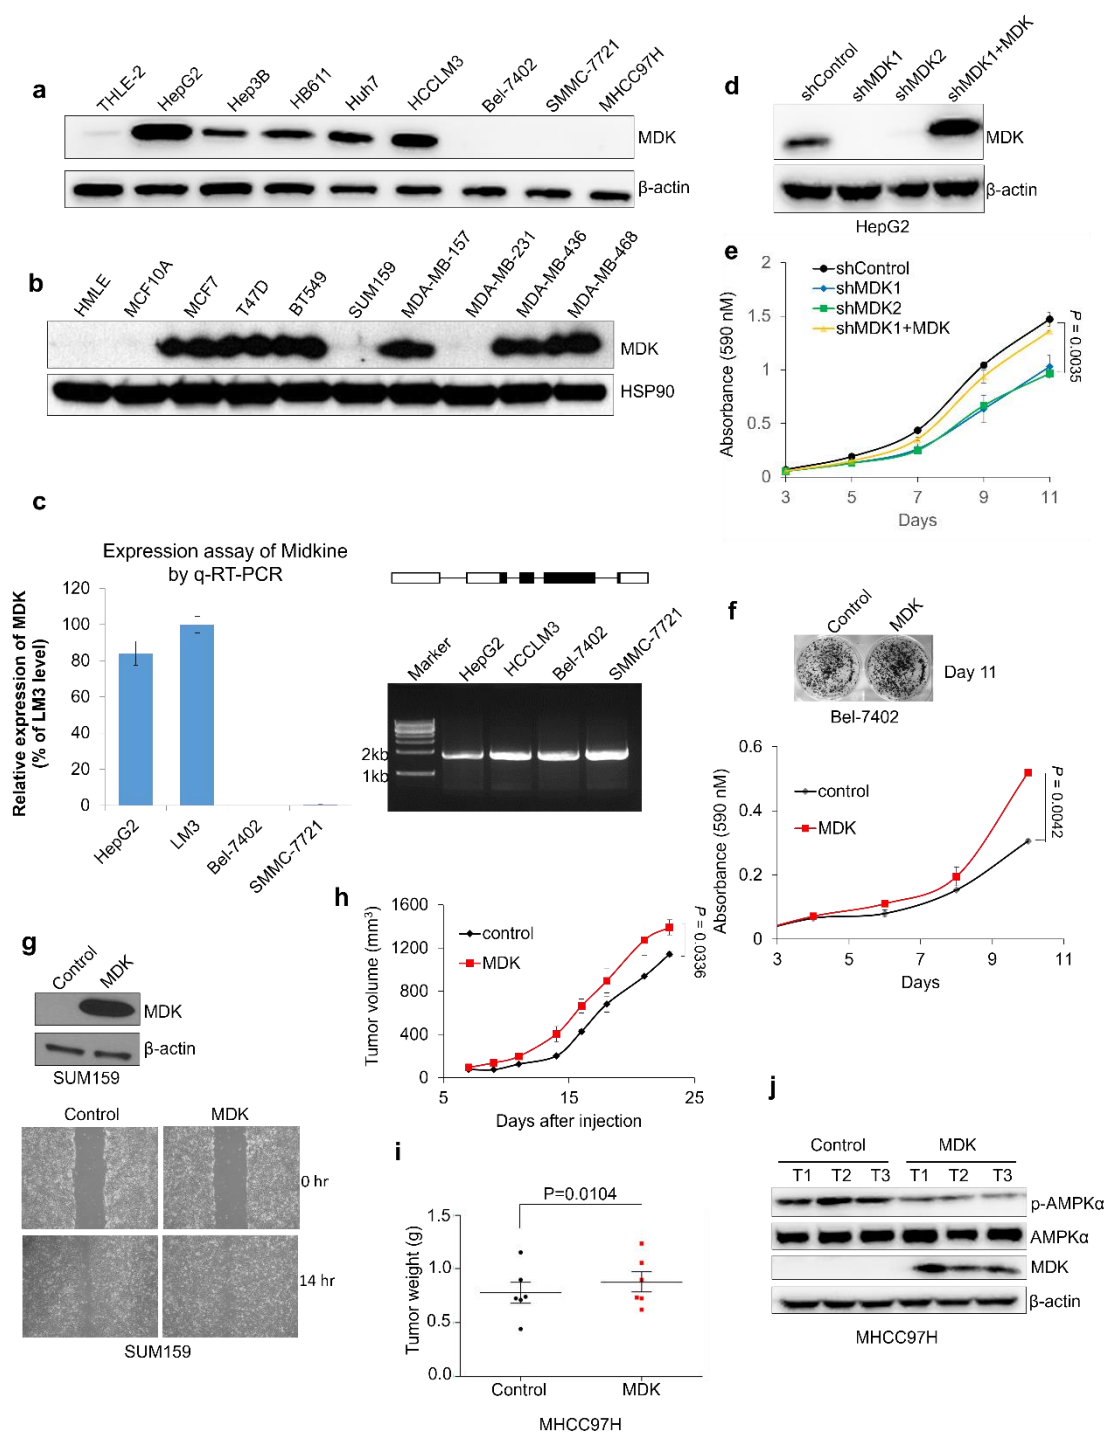

### Supplementary Figure 5 | Midkine promotes cancer cell proliferation, invasion and tumorigenesis

**a and b.** Western blotting of MDK and  $\beta$ -actin in the THLE2 and HCC cell lines (A) and HMLE and breast cancer cell lines (B).

**c.** qRT-PCR of *MDK* expression in HepG2, HCCLM3, Bel-7402 and SMMC-7721 cells (left panel). Structure of the MDK genomic DNA region (white boxes indicate

UTR, black boxes indicate ORF and black line indicate intron), and agarose gel image of PCR amplified MDK genomic DNA in HepG2, HCCLM3, Bel-7402 and SMMC-7721 cells (right panel).

**d and e.** Western blot analysis of MDK and  $\beta$ -actin in the HepG2 cells transduced with two independent MDK shRNAs and restored MDK in the MDK-knockdown cells (D), and cell growth curves of the HepG2 cells transduced with two independent MDK shRNAs and restored MDK in the MDK-knockdown cells (E).

**f.** Representative images and cell growth curve in Bel-7402 cells stably expressing MDK.

**g.** Western blot analysis of MDK and  $\beta$ -actin in the restored MDK-expressing SUM159 cells and representative images of the wound healing migration of the MDK-overexpressing SUM159 cells. Bar=2 mm.

**h and i.** Tumor growth curve (h) and weight (i) after mice were subcutaneously injected with MHCC97H cells transduced the MDK and the control cells.

**j.** Western blotting of p-AMPK $\alpha$ , AMPK $\alpha$ , MDK, and  $\beta$ -actin in tumors derived from the MHCC97H cells overexpressing MDK.

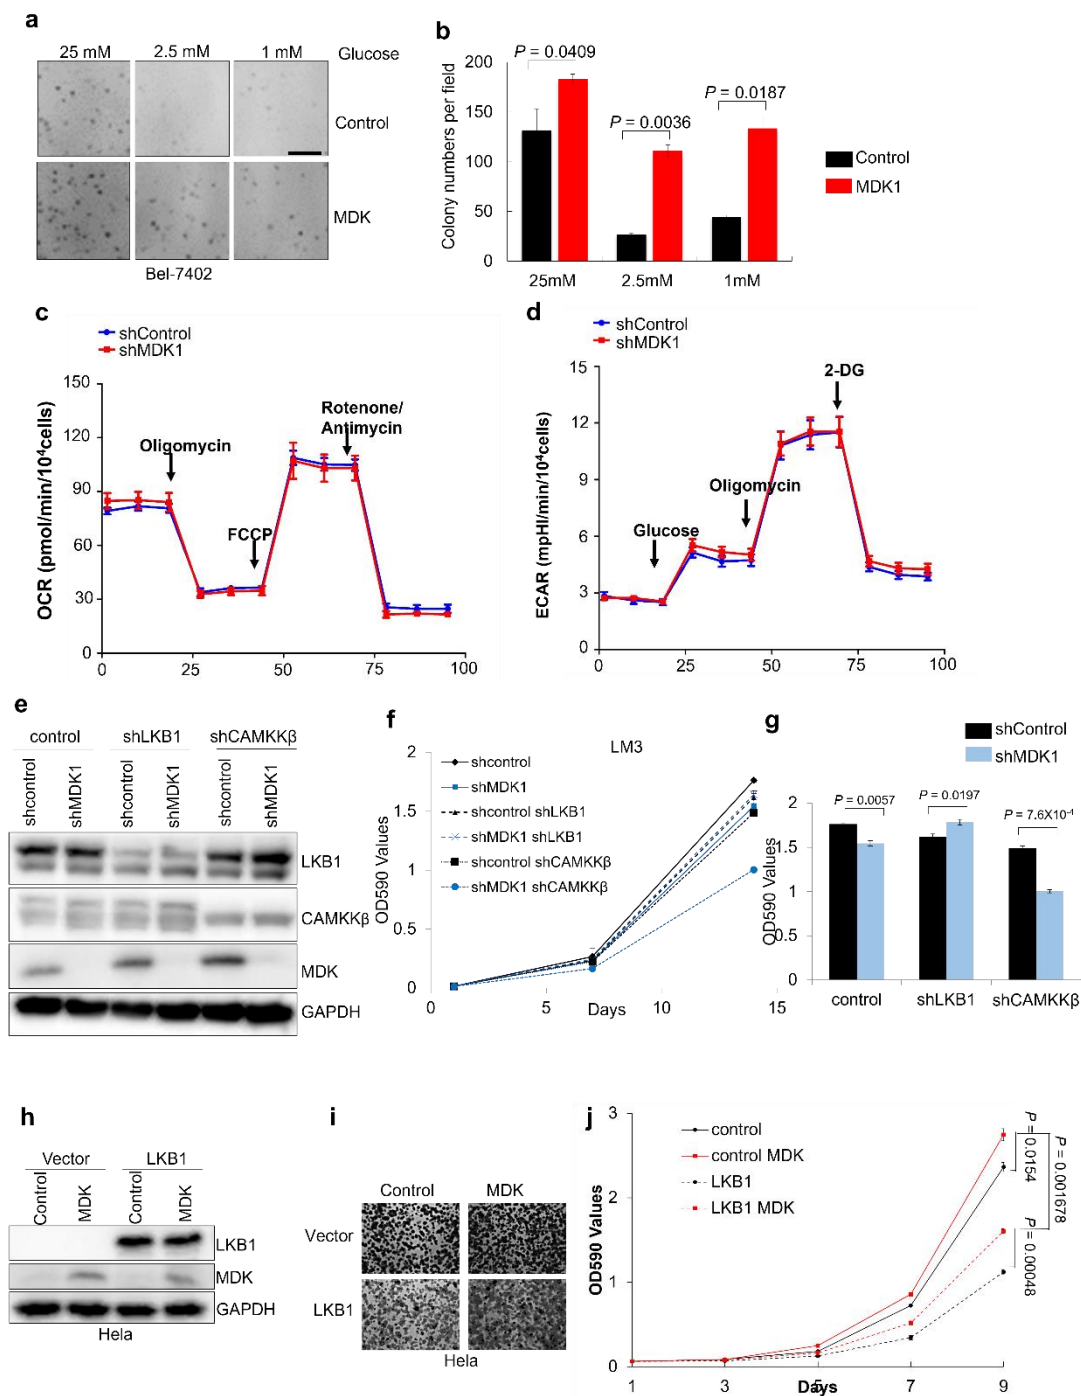

**Supplementary Figure 6 | Midkine promotes cancer progression by negatively regulating AMPK signaling**

**a and b.** Colony forming assay of the Bel-7402 cells transduced with MDK and the control cells treated with different concentrations of glucose. Images (a) and quantification (b) of colony formation.  $n=3$  wells per group. Scale bar, 200  $\mu\text{m}$ .

**c.** Cellular respiration measured as the basal and maximal oxygen consumption rates

(OCRs) in HCCLM3 cells transduced with MDK shRNA or control shRNA during sequential treatment with oligomycin (O), carbonyl cyanide p-trifluoromethoxyphenylhydrazone (FCCP) (F), and antimycin/rotenone (A/R). Bar chart indicates basal and maximal OCRs after FCCP injection;  $n = 3$  wells per group.

**d.** ECARs were measured during sequential injection of oligomycin (O) and 2-deoxyglucose (2-DG) in the HCCLM3 cells transduced with MDK shRNA or control shRNA. Bar chart shows basal ECAR;  $n = 3$  wells per group.

**e.** Western blotting of MDK, LKB1, CAMKK $\beta$  and GAPDH from HCCLM3 cells transduced with MDK shRNA alone or in combination with LKB1 shRNA or CAMKK $\beta$  shRNA.

**f and g.** Cell growth curve (f) and relative cell proliferation (g) of seeded HCCLM3 cells transduced with MDK shRNA alone or in combination with LKB1 shRNA or CAMKK $\beta$  shRNA.

**h-j.** LKB1 and MDK were stably expressed alone or simultaneously in HeLa cells, and western blotting were performed to test the expression of MDK, LKB1 and GAPDH (h), the cells were seeded on 6-well plates to test cell proliferation by cell growth curve (i-j).

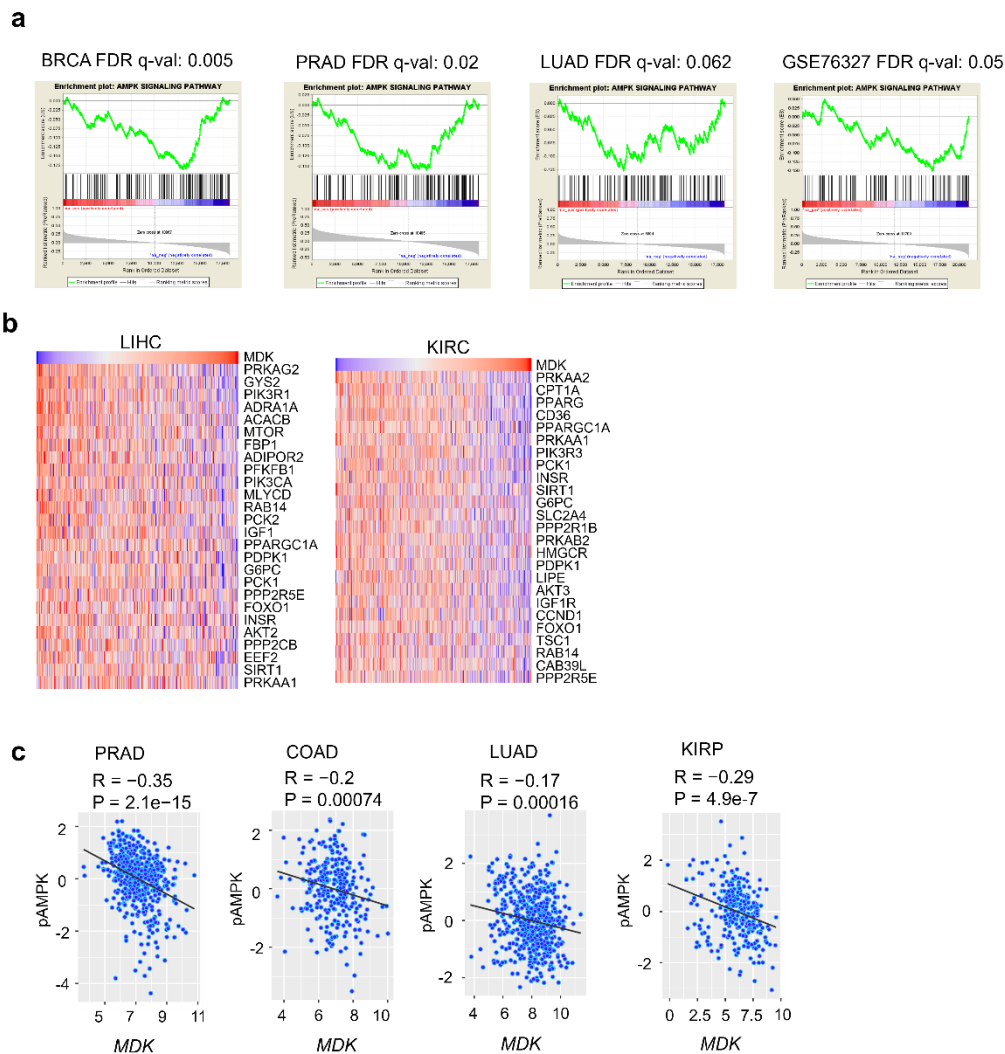

## Supplementary Figure 7 | Midkine promotes cancer progression by negatively regulating AMPK signaling

**a.** GSEA results showing the negative correlations between MDK and the AMPK signaling pathway based on three TCGA cohorts (BRCA, PRAD and LUAD) and one GEO dataset (GSE76327).

**b.** Heat maps showing the top 25 MDK-correlated AMPK signaling pathway genes in the TCGA LIHC and KIRC RNA-seq datasets.

**c.** Scatter plots showing the inverse correlation of MDK with AMPK activity in the TCGA LUAD, PRAD, COAD and KIRC datasets (LUAD n=515, PRAD n=497, COAD n=286, KIRC n=290). Statistical significance was determined by the Pearson correlation test. R: Pearson correlation coefficient.

**Supplementary Table 1**

| Characteristics     | N  | MDK |    | $\chi^2$ | P     |
|---------------------|----|-----|----|----------|-------|
|                     |    | +   | -  |          |       |
| Gender              |    |     |    |          |       |
| Male                | 12 | 6   | 6  | 2.017    | 0.156 |
| Female              | 62 | 44  | 18 |          |       |
| Ages (years)        |    |     |    |          |       |
| ≤60                 | 41 | 26  | 15 | 0.724    | 0.395 |
| >60                 | 33 | 24  | 9  |          |       |
| HBV/HCV             |    |     |    |          |       |
| Negative            | 11 | 5   | 6  | 1.820    | 0.177 |
| Positive            | 63 | 45  | 18 |          |       |
| AFP (ng/ml)         |    |     |    |          |       |
| ≤20                 | 29 | 22  | 7  | 1.497    | 0.221 |
| >20                 | 45 | 28  | 17 |          |       |
| Liver cirrhosis     |    |     |    |          |       |
| No                  | 22 | 12  | 10 | 2.423    | 0.120 |
| Yes                 | 52 | 38  | 14 |          |       |
| Tumor encapsulation |    |     |    |          |       |
| None                | 18 | 14  | 4  | 1.132    | 0.287 |
| Complete            | 56 | 36  | 20 |          |       |
| Tumor number        |    |     |    |          |       |
| Single              | 61 | 41  | 20 | 0.000    | 1.000 |
| Mutiple             | 13 | 9   | 4  |          |       |
| Tumor Size          |    |     |    |          |       |
| ≤5                  | 41 | 24  | 17 | 3.422    | 0.064 |
| >5                  | 33 | 26  | 7  |          |       |
| Differentiation     |    |     |    |          |       |
| Poor-moderate       | 37 | 29  | 8  | 3.947    | 0.047 |
| Well                | 37 | 21  | 16 |          |       |
| TNM stage           |    |     |    |          |       |
| I+II                | 52 | 31  | 21 | 5.047    | 0.025 |
| III+IV              | 22 | 19  | 3  |          |       |
| BCLC stage          |    |     |    |          |       |
| A                   | 44 | 26  | 18 | 3.559    | 0.059 |
| B+C                 | 30 | 24  | 6  |          |       |

| REAGENT or RESOURCE              | RESOURCE                  | IDENTIFIER                              |
|----------------------------------|---------------------------|-----------------------------------------|
| <b>Antibodies</b>                |                           |                                         |
| Rabbit anti-p-AMPK $\alpha$ T172 | Cell Signaling Technology | Cat# 2535; RRID: AB_331250              |
| Rabbit anti-AMPK $\alpha$        | Cell Signaling Technology | Cat# 5831s; RRID: AB_10622186           |
| Rabbit anti-ACC                  | Cell Signaling Technology | Cat# 3662S;RRID: AB_2219400             |
| Rabbit anti-p-ACC S79            | Cell Signaling Technology | Cat# 3661S; RRID: AB_330337             |
| Rabbit anti-p-Akt S473           | Cell Signaling Technology | Cat# 4060s; RRID: AB_2315049            |
| Rabbit anti-Akt                  | Cell Signaling Technology | Cat# 4691s; RRID: AB_915783             |
| Rabbit anti-p-S6K T389           | Cell Signaling Technology | Cat# 9234s; RRID: AB_2269803            |
| Rabbit anti-S6K                  | Cell Signaling Technology | Cat# 2708s; RRID: AB_390722             |
| Rabbit anti-p-LKB1 S428          | Cell Signaling Technology | Cat# 3482s; RRID: AB_2198321            |
| Normal Rabbit IgG                | Cell Signaling Technology | Cat# 2729s; RRID: AB_1031062            |
| Rabbit anti-STRAD $\alpha$       | Abcam                     | Cat# ab192879;                          |
| Rabbit anti-Mo25a                | Abcam                     | Cat# ab51132; RRID: AB_868561           |
| Mouse anti-LKB1                  | Abcam                     | Cat# ab15095; RRID: AB_301641           |
| Normal mouse IgG                 | Santa Cruz Biotechnology  | Cat# sc-2025; RRID: AB_737182           |
| Mouse-anti-CAMKK $\beta$         | Santa Cruz Biotechnology  | Cat# sc-sc271674; RRID: AB_10708844     |
| Mouse anti-midkine               | Santa Cruz Biotechnology  | Cat# SC-46701; RRID: AB_627949          |
| Mouse anti-FLAG Tag              | Sigma                     | Cat# F1804; RRID: AB_262044             |
| Mouse anti-GAPDH                 | Proteintech               | Cat# 60004-1-Ig; RRID: AB_2107436       |
| Rabbit anti-LKB1                 | Proteintech               | Cat# 10746-1-AP; RRID: AB_2271311       |
| Mouse anti-MYC Tag               | Proteintech               | Cat# 60003-2-Ig; RRID: AB_2734122       |
| Mouse anti-HA Tag                | Proteintech               | Cat# 66006-1-Ig; RRID: AB_2857911       |
| Rabbit anti-STRAD $\beta$        | Proteintech               | Cat# 10688-1AP; RRID: AB_2197715        |
| Rabbit anti-AMPK $\beta$ 1       | Proteintech               | Cat# 10308-1-AP; RRID: AB_513239        |
| Rabbit anti-AMPK $\gamma$ 1      | Proteintech               | Cat# 10290-1-AP; RRID: AB_2268781       |
| Mouse anti- $\beta$ -actin       | Proteintech               | Cat# 66009-1-Ig; RRID: AB_268793810746- |
| Rabbit anti-AMPK $\alpha$ 1      | Proteintech               | Cat# 10929-2-AP; RRID:                  |



|                              |             |                                               |       |
|------------------------------|-------------|-----------------------------------------------|-------|
| Rabbit anti- AMPK $\alpha$ 2 | Proteintech | AB_2169568<br>Cat# 18167-1-AP;<br>AB_10695046 | RRID: |
|------------------------------|-------------|-----------------------------------------------|-------|

### Chemicals and Reagents

|                                     |                          |                |
|-------------------------------------|--------------------------|----------------|
| DMEM                                | Gibco                    | Cat# 11995065  |
| DMEM no glucose and sodium pyruvate | Gibco                    | Cat# 11966-026 |
| RPMI 1640                           | Gibco                    | Cat# A1049101  |
| RPMI 1640 no glucose                | Gibco                    | Cat# 11879020  |
| Trypsin                             | Yeasen                   | Cat# 40127ES60 |
| Penicillin-Streptomycin             | Yeasen                   | Cat# 60162ES76 |
| Opti-MEM                            | Thermo Fisher Scientific | Cat# 31985070  |
| FBS                                 | Gibco                    | Cat# 10099-141 |
| Matrigel Matrix                     | BioCoat                  | Cat# 356234    |
| Heparin sodium                      | Selleck                  | Cat# S1346     |
| Protein A/G Magnetic Beads          | Bimake                   | Cat# B23201    |
| S-Protein agarose                   | Millipore, USA           | Cat# 69704     |
| HpaI                                | Thermo Fisher Scientific | Cat# FD1034    |
| EcoRI                               | Thermo Fisher Scientific | Cat# FD0274    |
| NotI                                | Thermo Fisher Scientific | Cat# FD0596    |
| NheI                                | Thermo Fisher Scientific | Cat# FD0974    |
| KpnI                                | Thermo Fisher Scientific | Cat# FD0524    |
| XhoI                                | Thermo Fisher Scientific | Cat# FD0694    |
| PstI                                | Thermo Fisher Scientific | Cat# FD0614    |
| T4 DNA ligase                       | Thermo Fisher Scientific | Cat# EL0011    |
| BP CLONASE II ENZYME MIX            | Thermo Fisher Scientific | Cat# 11789020  |
| LR CLONASE II ENZYME MIX            | Thermo Fisher Scientific | Cat# 11791020  |
| Blasticidin                         | InvivoGen                | Cat# ant-bl-1  |
| Puromycin                           | InvivoGen                | Cat# ant-pr-1  |
| BCA protein assay kit               | TIANGEN BIOTECH          | Cat# PA115     |
| PEI                                 | Polysciences             | Cat# 24765     |
| 2-Deoxy-D-Glucose                   | Sigma                    | Cat# D8375     |
| Protease inhibitor Cocktail         | Bimake                   | Cat# 14002     |
| Phosphatase inhibitor               | Bimake                   | Cat#15002      |

Cocktail

### Biological Samples

Human HCC Tissue Shanghai Outdo Biotech LivH150CS03  
Microarrays Company

### Deposited Data

HCC expression data TCGA [www.cbioportal.org](http://www.cbioportal.org)

### Organisms/Strains

BALB/C nude mice Beijing Vital River N/A  
Laboratory Animal  
Technology Co., Ltd  
(Beijing, China)

### Recombinant DNA

pLKO.1-bsh-shRNA

AMPK $\alpha$ 1-shRNA Sigma-Aldrich TRCN0000199831

CCGGGTGACCTCAC

TTGACTCTTCTCTCGA

GAGAAGAGTCAAGTG

AGGTCACCTTTTTTG

LKB1-shRNA Sigma-Aldrich TRCN0000000409

CCGGGATCCTCAAGA

AGAAGAAGTTCTCGA

GAACTTCTTCTTCTTG

AGGATCTTTTT

CAMKK $\beta$ -shRNA Sigma-Aldrich TRCN0000002299

CCGGGTGAAGACCATG

ATACGTAAACTCGAGTT

TACGTATCATGGTCTTCA

CTTTTT

Midkine-shRNA1 In house plenti

TGATTAAAGCTAAC

GAGCA

Midkine-shRNA2 In house plenti

TTCTTAGTAATGGA

ATTGT

SFB-AMPK $\alpha$ 1 This paper N/A

pCDNA-Flag-AMPK $\beta$ 1 This paper N/A

pCDNA-Flag-AMPK $\gamma$ 1 This paper N/A

SFB-LKB1 This paper N/A

|                   |            |     |
|-------------------|------------|-----|
| SFB-LKB1NK        | This paper | N/A |
| SFB-LKB1KC        | This paper | N/A |
| pCDNA-Flag-LKB1   | This paper | N/A |
| pCDNA-Flag-LKB1KD | This paper | N/A |
| pCDNA-Flag-LKB1NK | This paper | N/A |
| pCDNA-Flag-LKB1KC | This paper | N/A |
| SFB-CAMKK $\beta$ | This paper | N/A |
| MDK-SFB           | This paper | N/A |
| pCDNA-MDKHA       | This paper | N/A |
| pLoc-MDKHA        | This paper | N/A |
| pLoc-MDKMyc       | This paper | N/A |

### Cell lines

|           |                       |                   |
|-----------|-----------------------|-------------------|
| MHCC97H   | CTCC, Shanghai, China |                   |
| HUH7      | CTCC, Shanghai, China | SCSP-528          |
| BEL-7402  | CTCC, Shanghai, China | TCHu182/ SCSP-526 |
| Hep3B     | CTCC, Shanghai, China | TCHu 10           |
| HepG2     | CTCC, Shanghai, China | SCSP-5045         |
| SMMC-7721 | CTCC, Shanghai, China | SCSP-510          |
| HEK293T   | CTCC, Shanghai, China | TCHu 52           |
| HCC-LM3   |                       | GNHu44            |
| HB611     |                       | N/A               |
| THLE-2    | ATCC                  | N/A               |
| A549      | ATCC                  | N/A               |

### Software and Algorithms

|                                     |                 |                                                                                                                   |
|-------------------------------------|-----------------|-------------------------------------------------------------------------------------------------------------------|
| Image J                             | N/A             | <a href="https://imagej.nih.gov/ij/">https://imagej.nih.gov/ij/</a>                                               |
| Gene Set Enrichment Analysis (GSEA) | Broad Institute | <a href="http://software.broadinstitute.org/gsea/index.jsp">http://software.broadinstitute.org/gsea/index.jsp</a> |
| SPSS 21.0                           | IBM             | N/A                                                                                                               |
| GEPIA                               | N/A             | <a href="http://gepia.cancer-pku.cn/">http://gepia.cancer-pku.cn/</a>                                             |
| CCLE                                | N/A             | <a href="https://portals.broadinstitute.org/ccle">https://portals.broadinstitute.org/ccle</a>                     |
| METABOANALYST                       | N/A             | <a href="https://www.metaboanalyst.ca/">https://www.metaboanalyst.ca/</a>                                         |
| R2                                  | N/A             | <a href="https://hgserver1.amc.nl/cgi-bin/r2/main.cgi">https://hgserver1.amc.nl/cgi-bin/r2/main.cgi</a>           |

---
